# Supplementary material for: The Phylogenetic Relationships of Tiaronthophagus n.gen. (Coleoptera, Scarabaeidae, Onthophagini) Evaluated by Phenotypic Characters
Source: MDPI journal article supplement (doi:10.3390/insects10030064), 2019-03-01

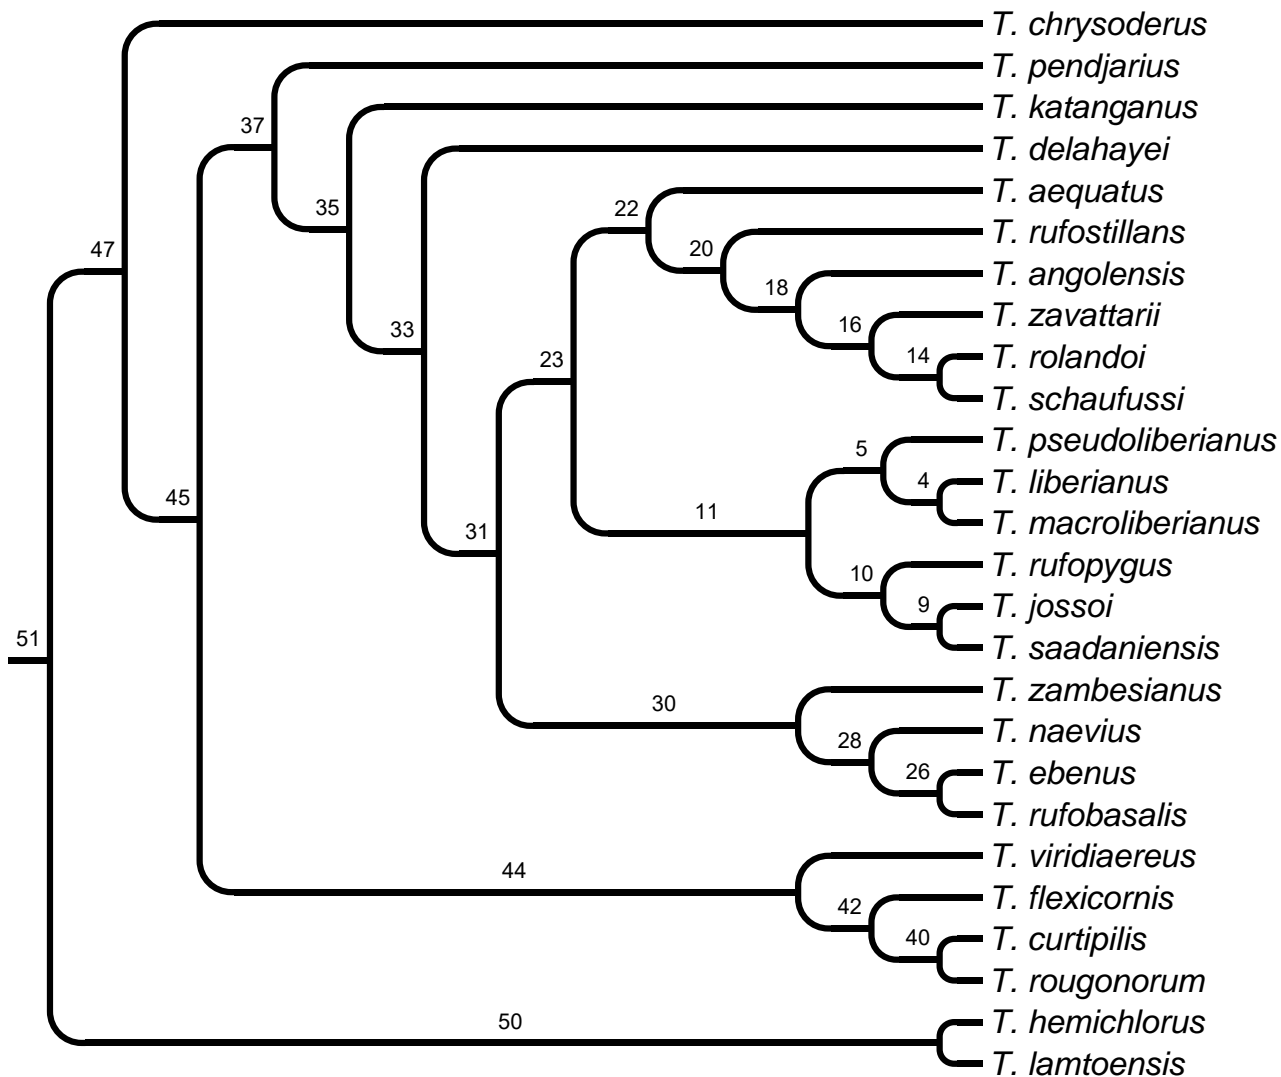

# OR reconstruction

|                           |                        |
|---------------------------|------------------------|
| node_1 [pseudoliberianus] | node_27 [naevius]      |
| node_2 [liberianus]       | node_28                |
| node_3 [macroliberianus]  | node_29 [zambesianus]  |
| node_4                    | node_30                |
| node_5                    | node_31                |
| node_6 [rufopygus]        | node_32 [delahayei]    |
| node_7 [jossoi]           | node_33                |
| node_8 [saadaniensis]     | node_34 [katanganus]   |
| node_9                    | node_35                |
| node_10                   | node_36 [pendjarius]   |
| node_11                   | node_37                |
| node_12 [schaufussi]      | node_38 [rougonorum]   |
| node_13 [rolandoi]        | node_39 [curtipilis]   |
| node_14                   | node_40                |
| node_15 [zavattarii]      | node_41 [flexicornis]  |
| node_16                   | node_42                |
| node_17 [angolensis]      | node_43 [viridiaereus] |
| node_18                   | node_44                |
| node_19 [rufostillans]    | node_45                |
| node_20                   | node_46 [chrysoderus]  |
| node_21 [aequatus]        | node_47                |
| node_22                   | node_48 [lamtoensis]   |
| node_23                   | node_49 [hemichlorus]  |
| node_24 [rufobasalis]     | node_50                |
| node_25 [ebenus]          | node_51                |
| node_26                   |                        |

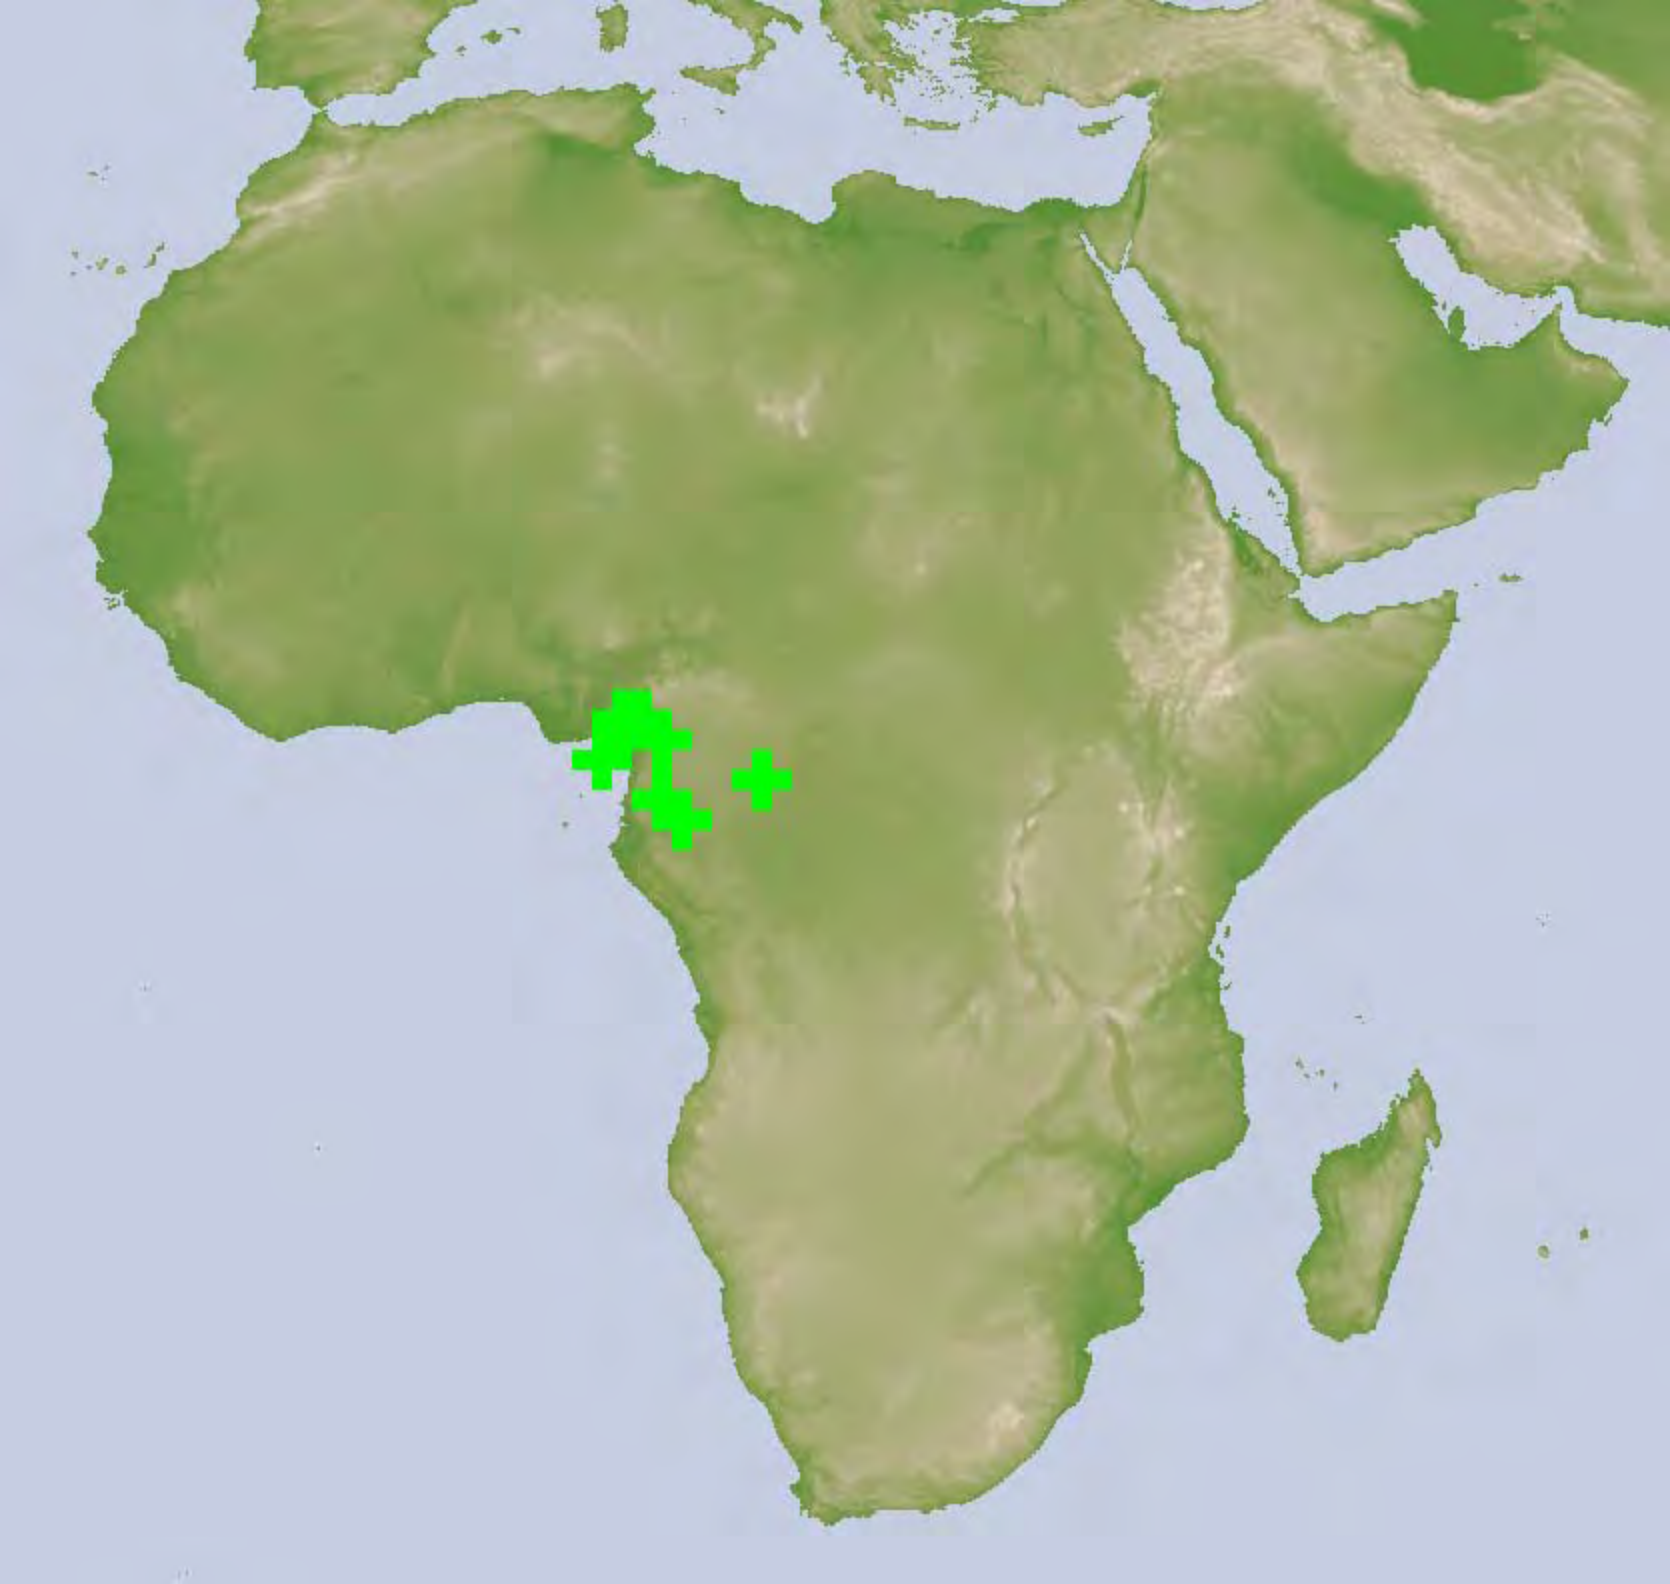

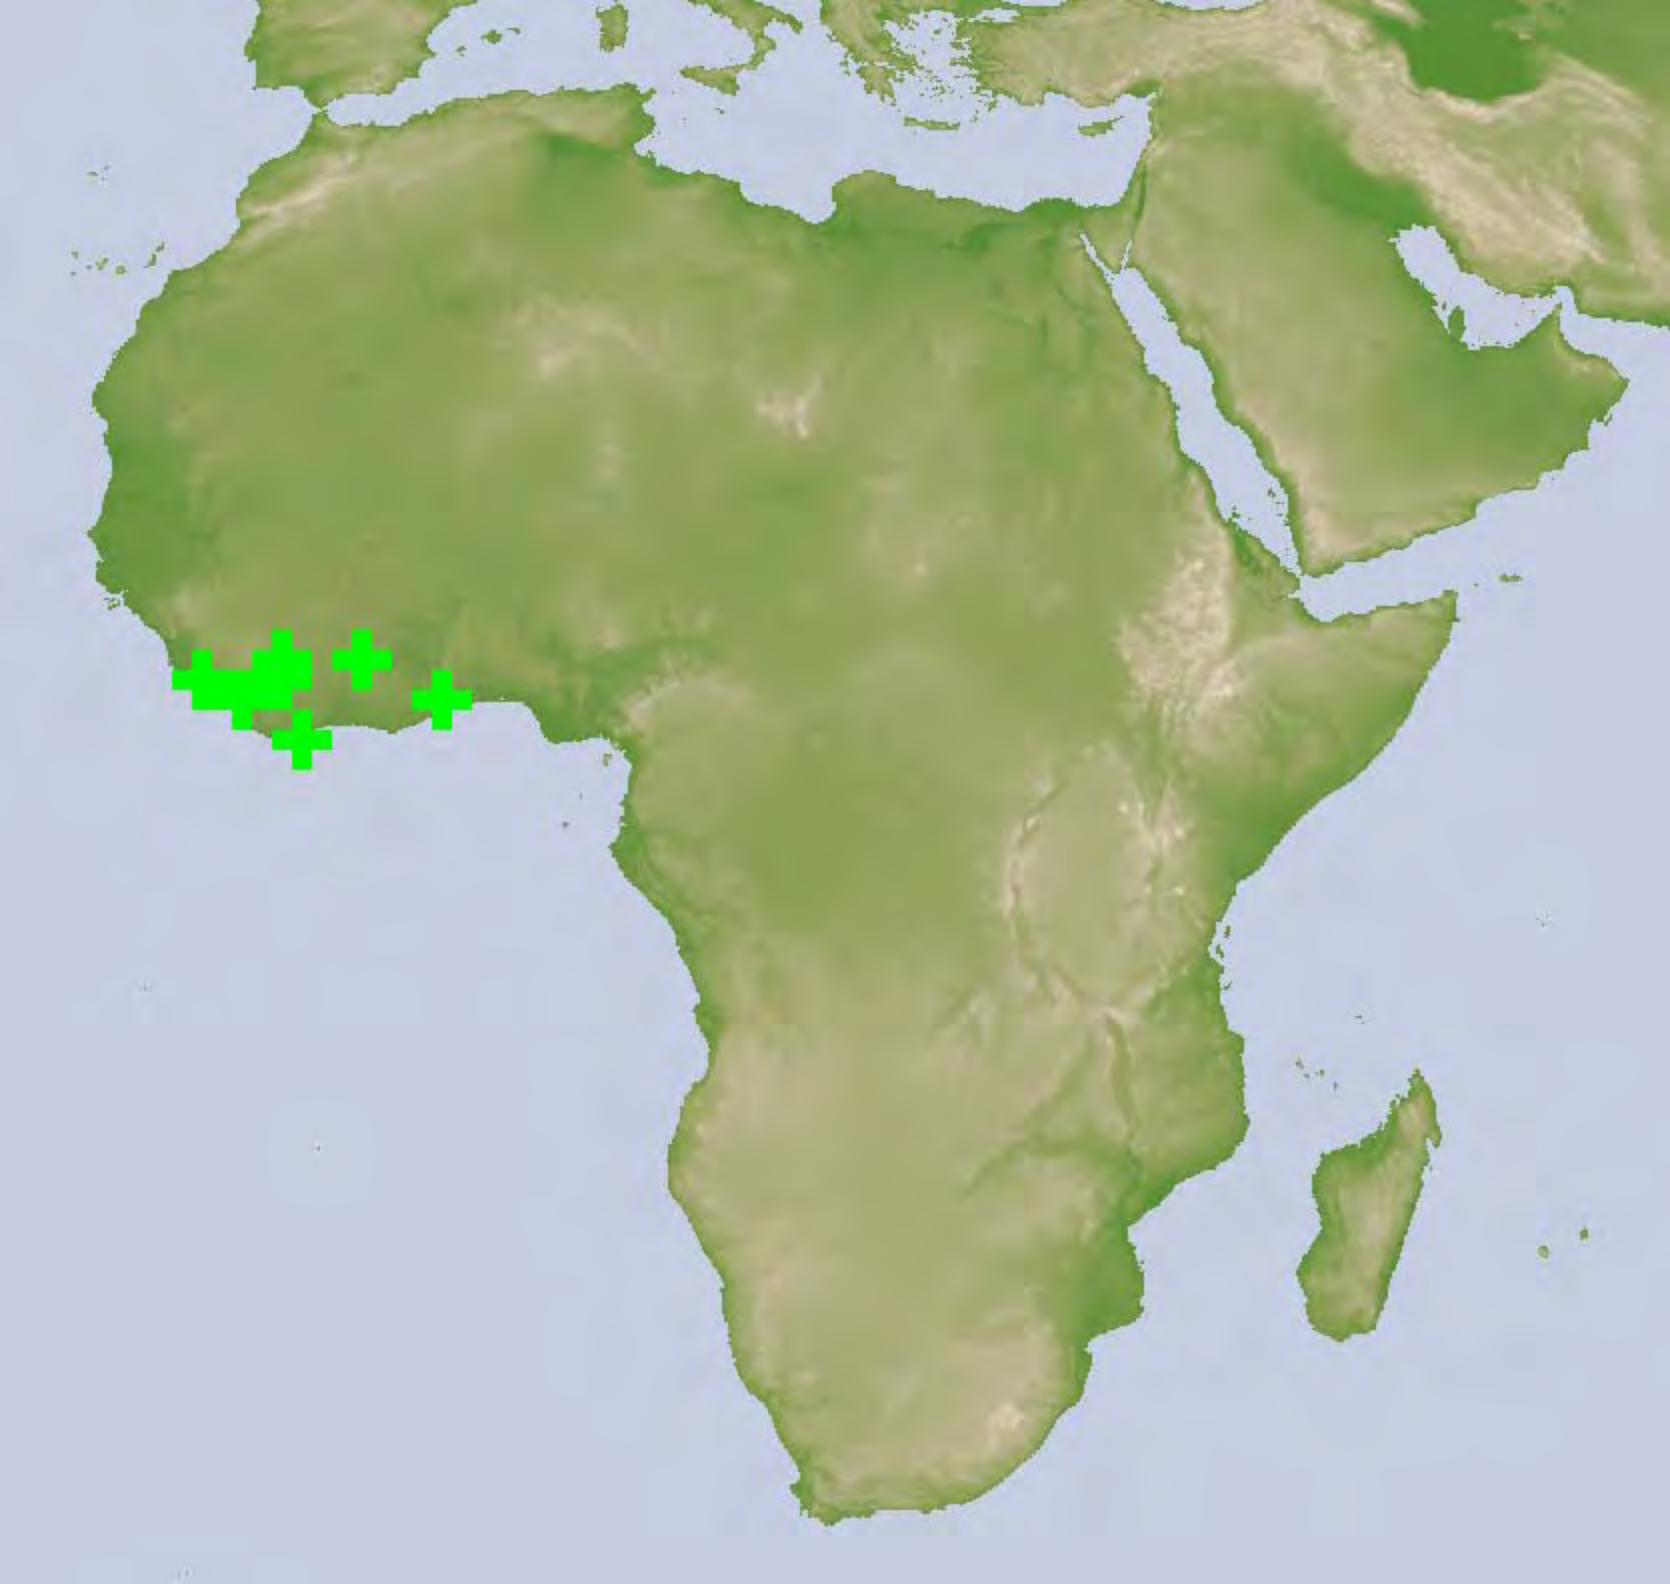

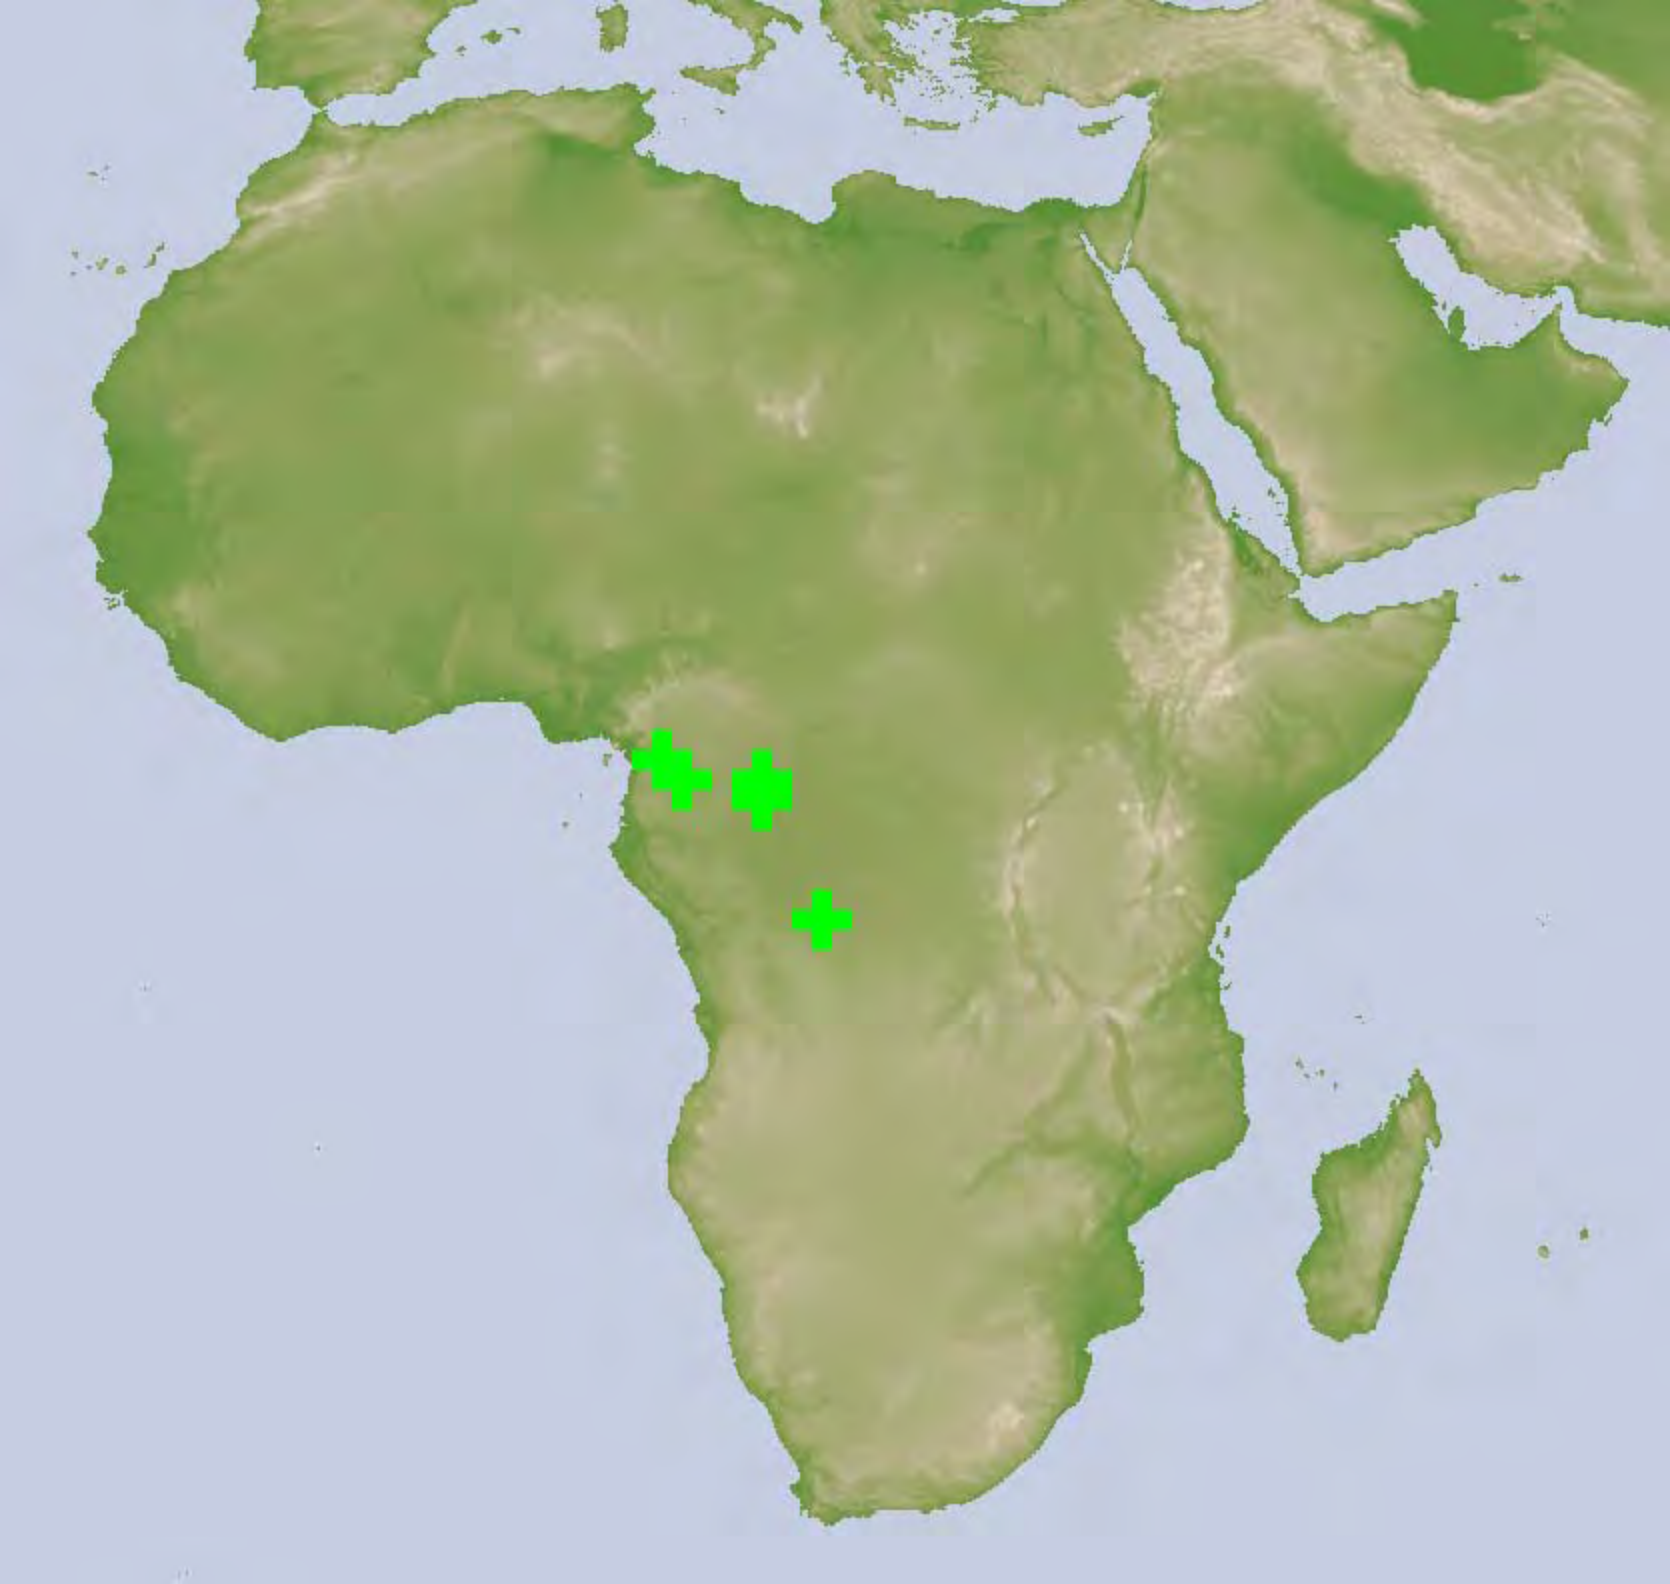



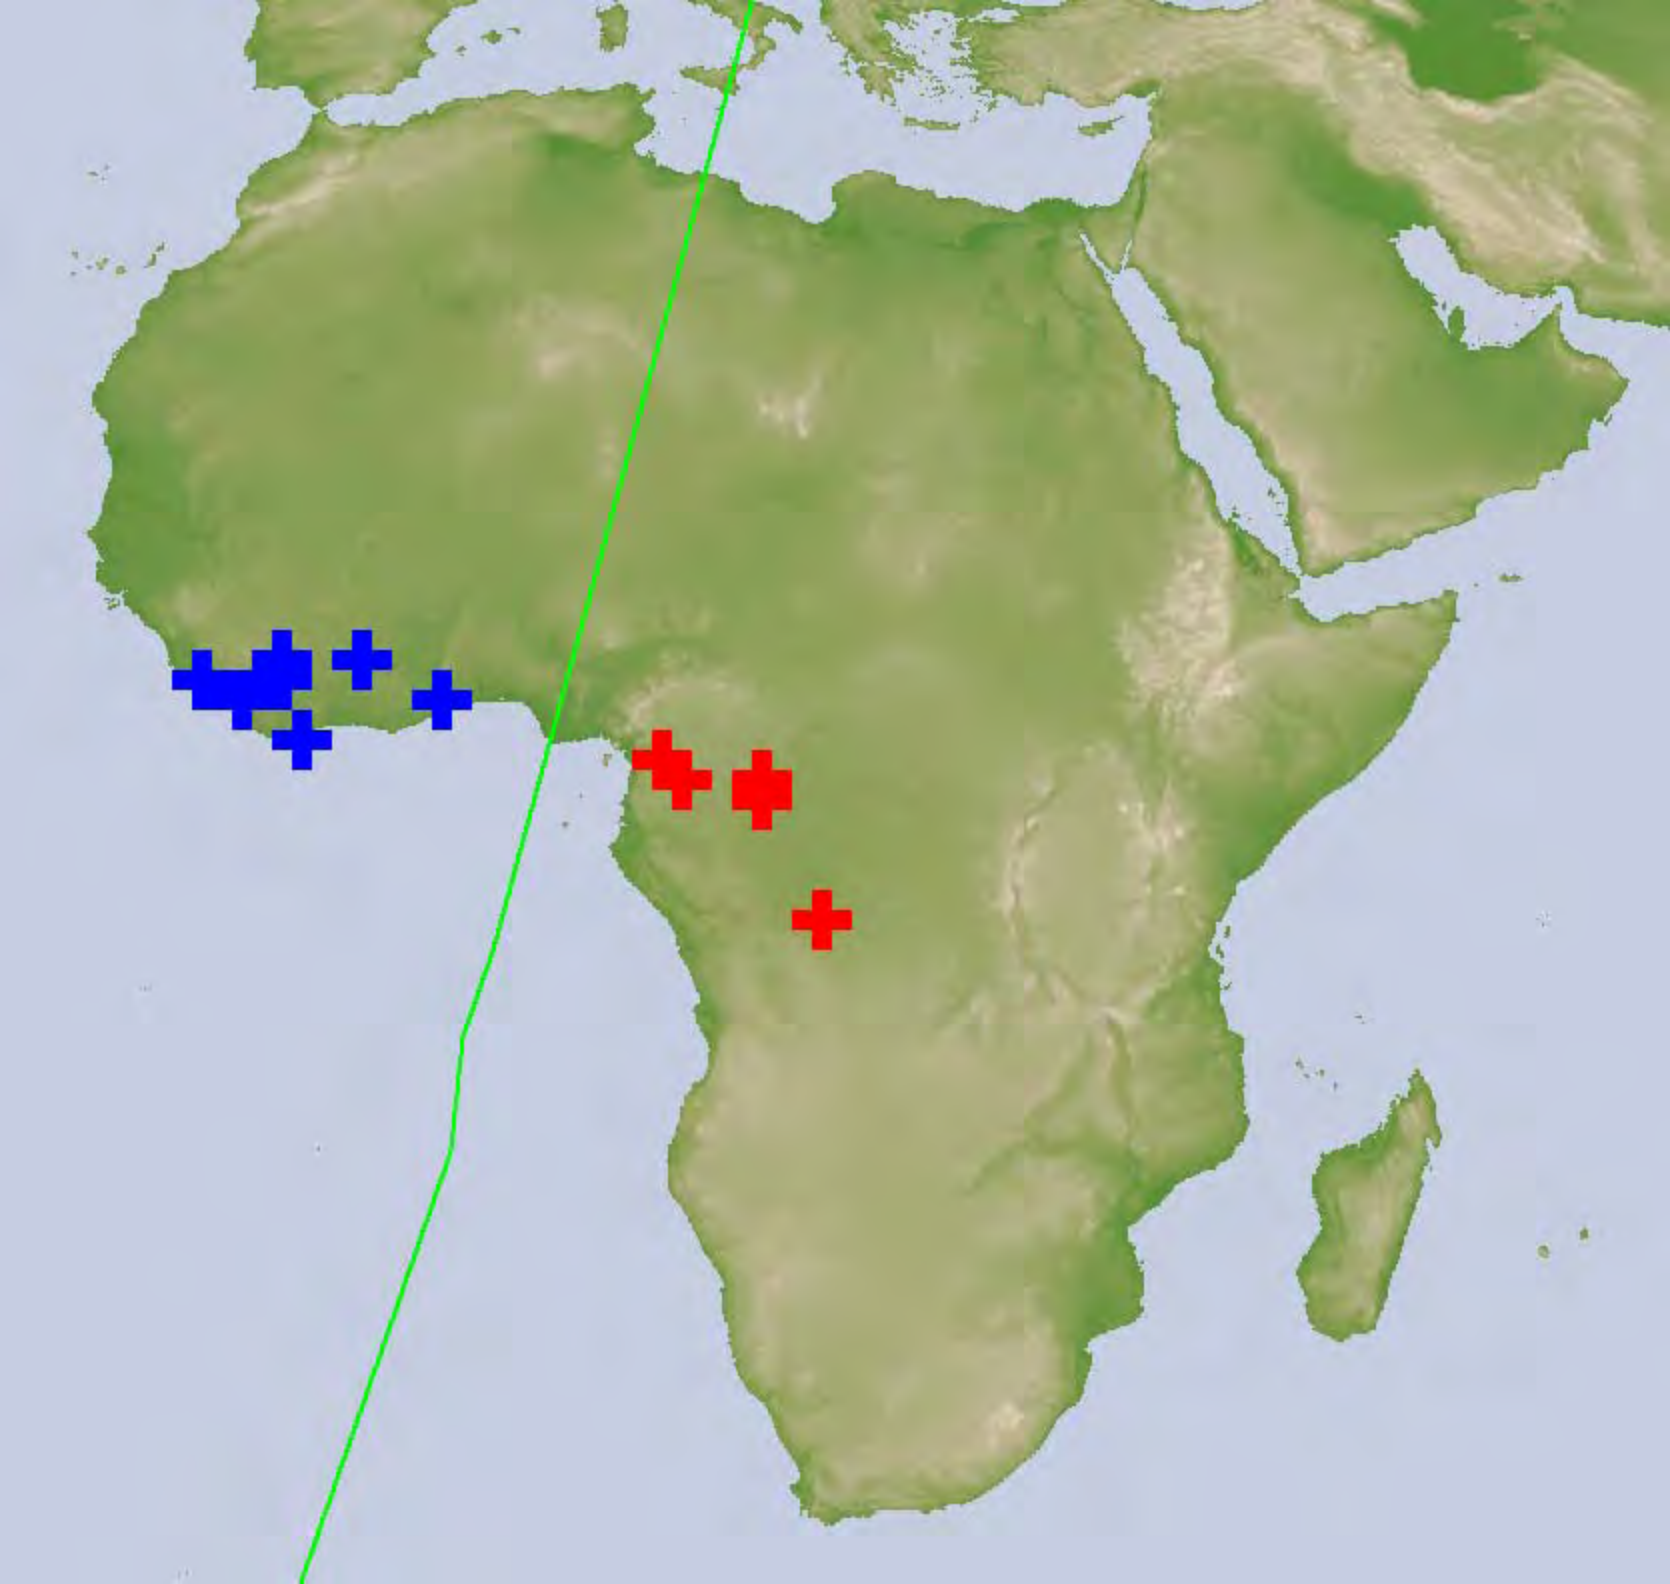

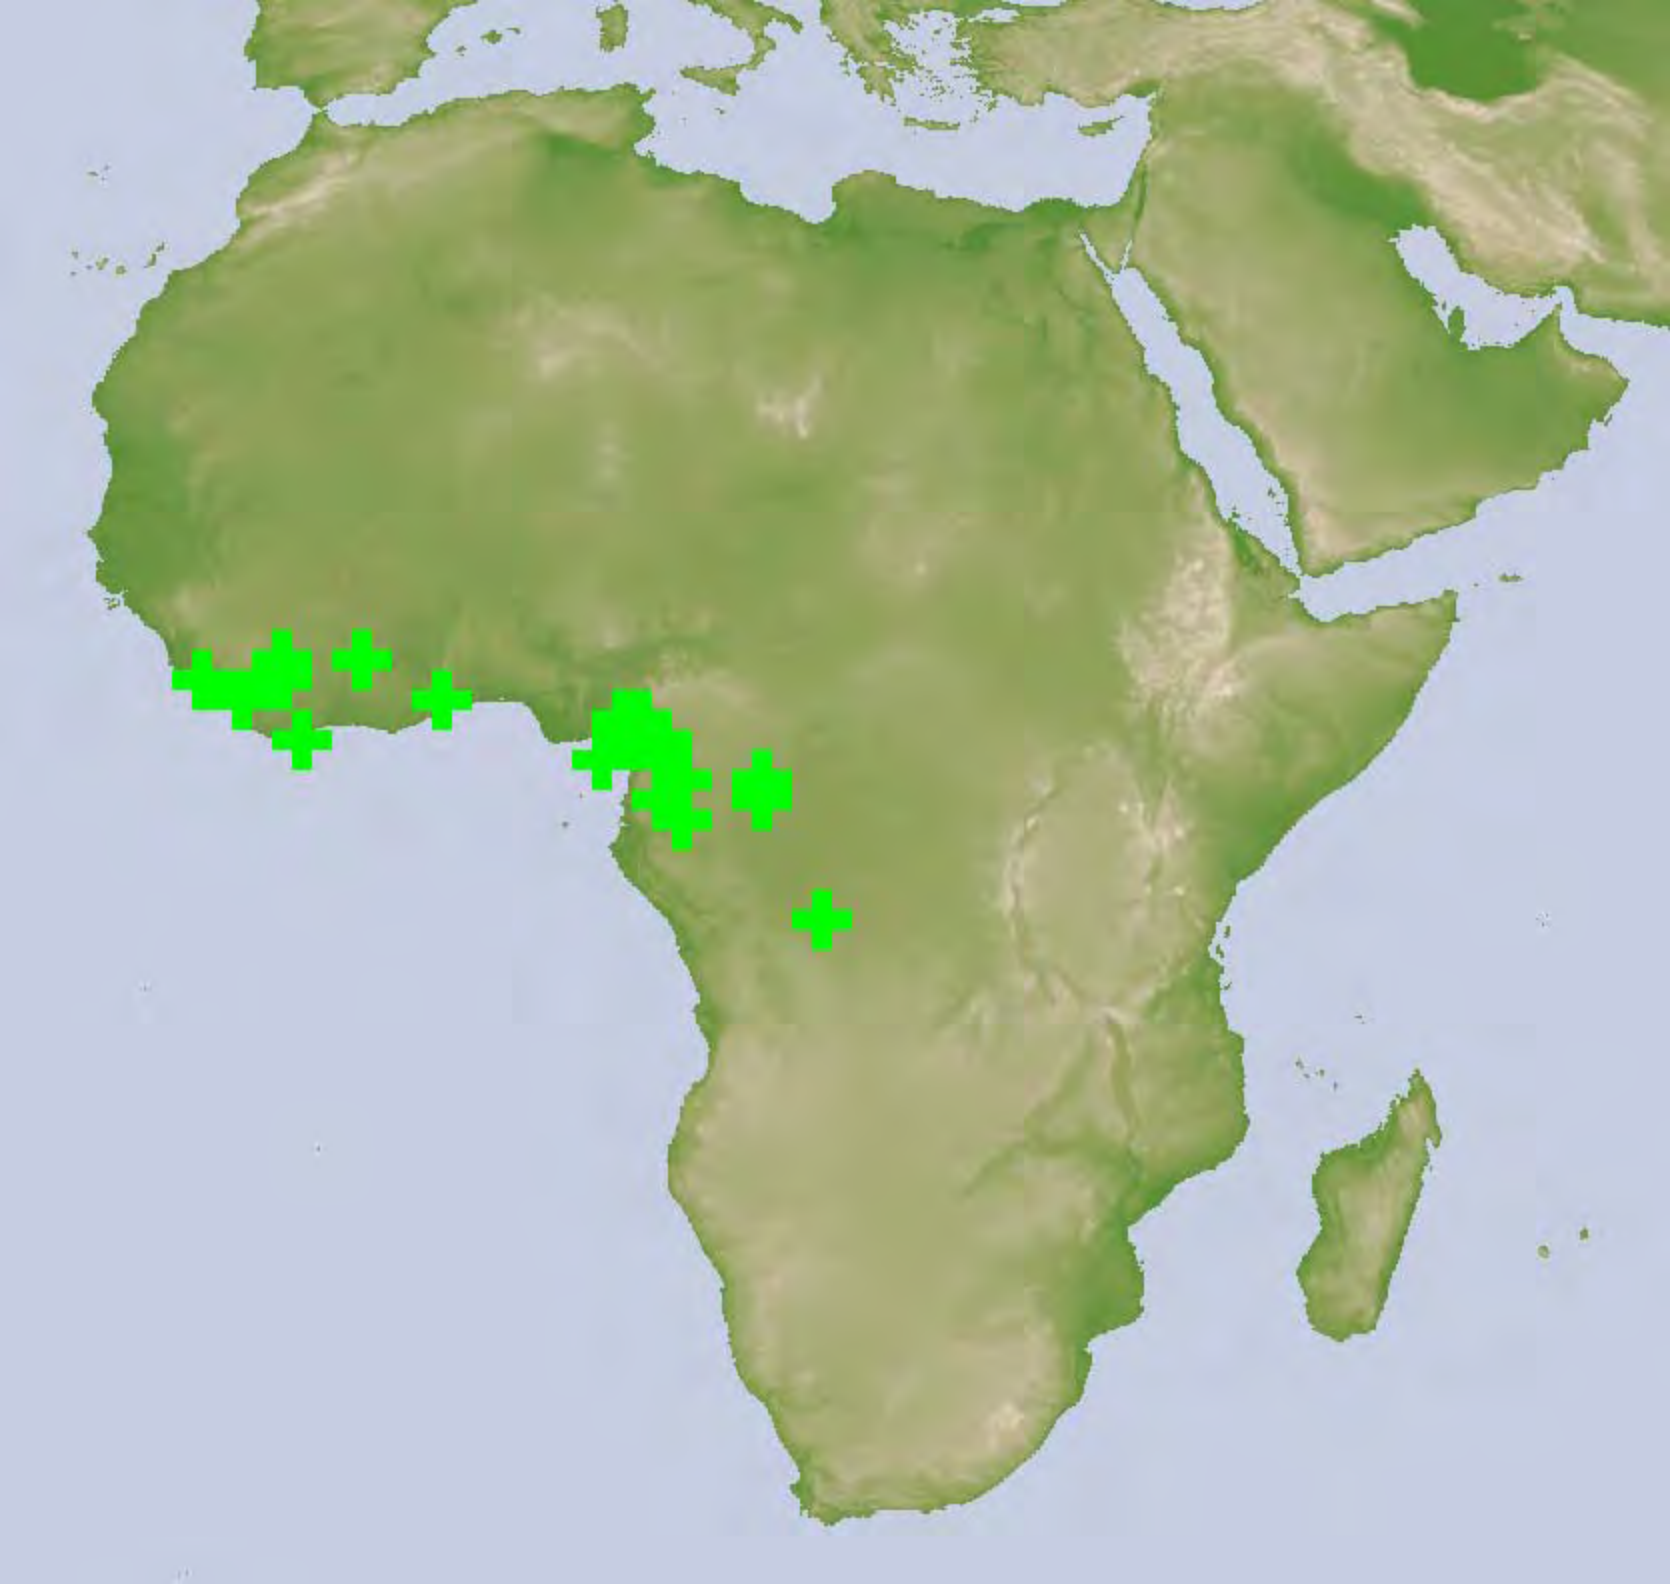

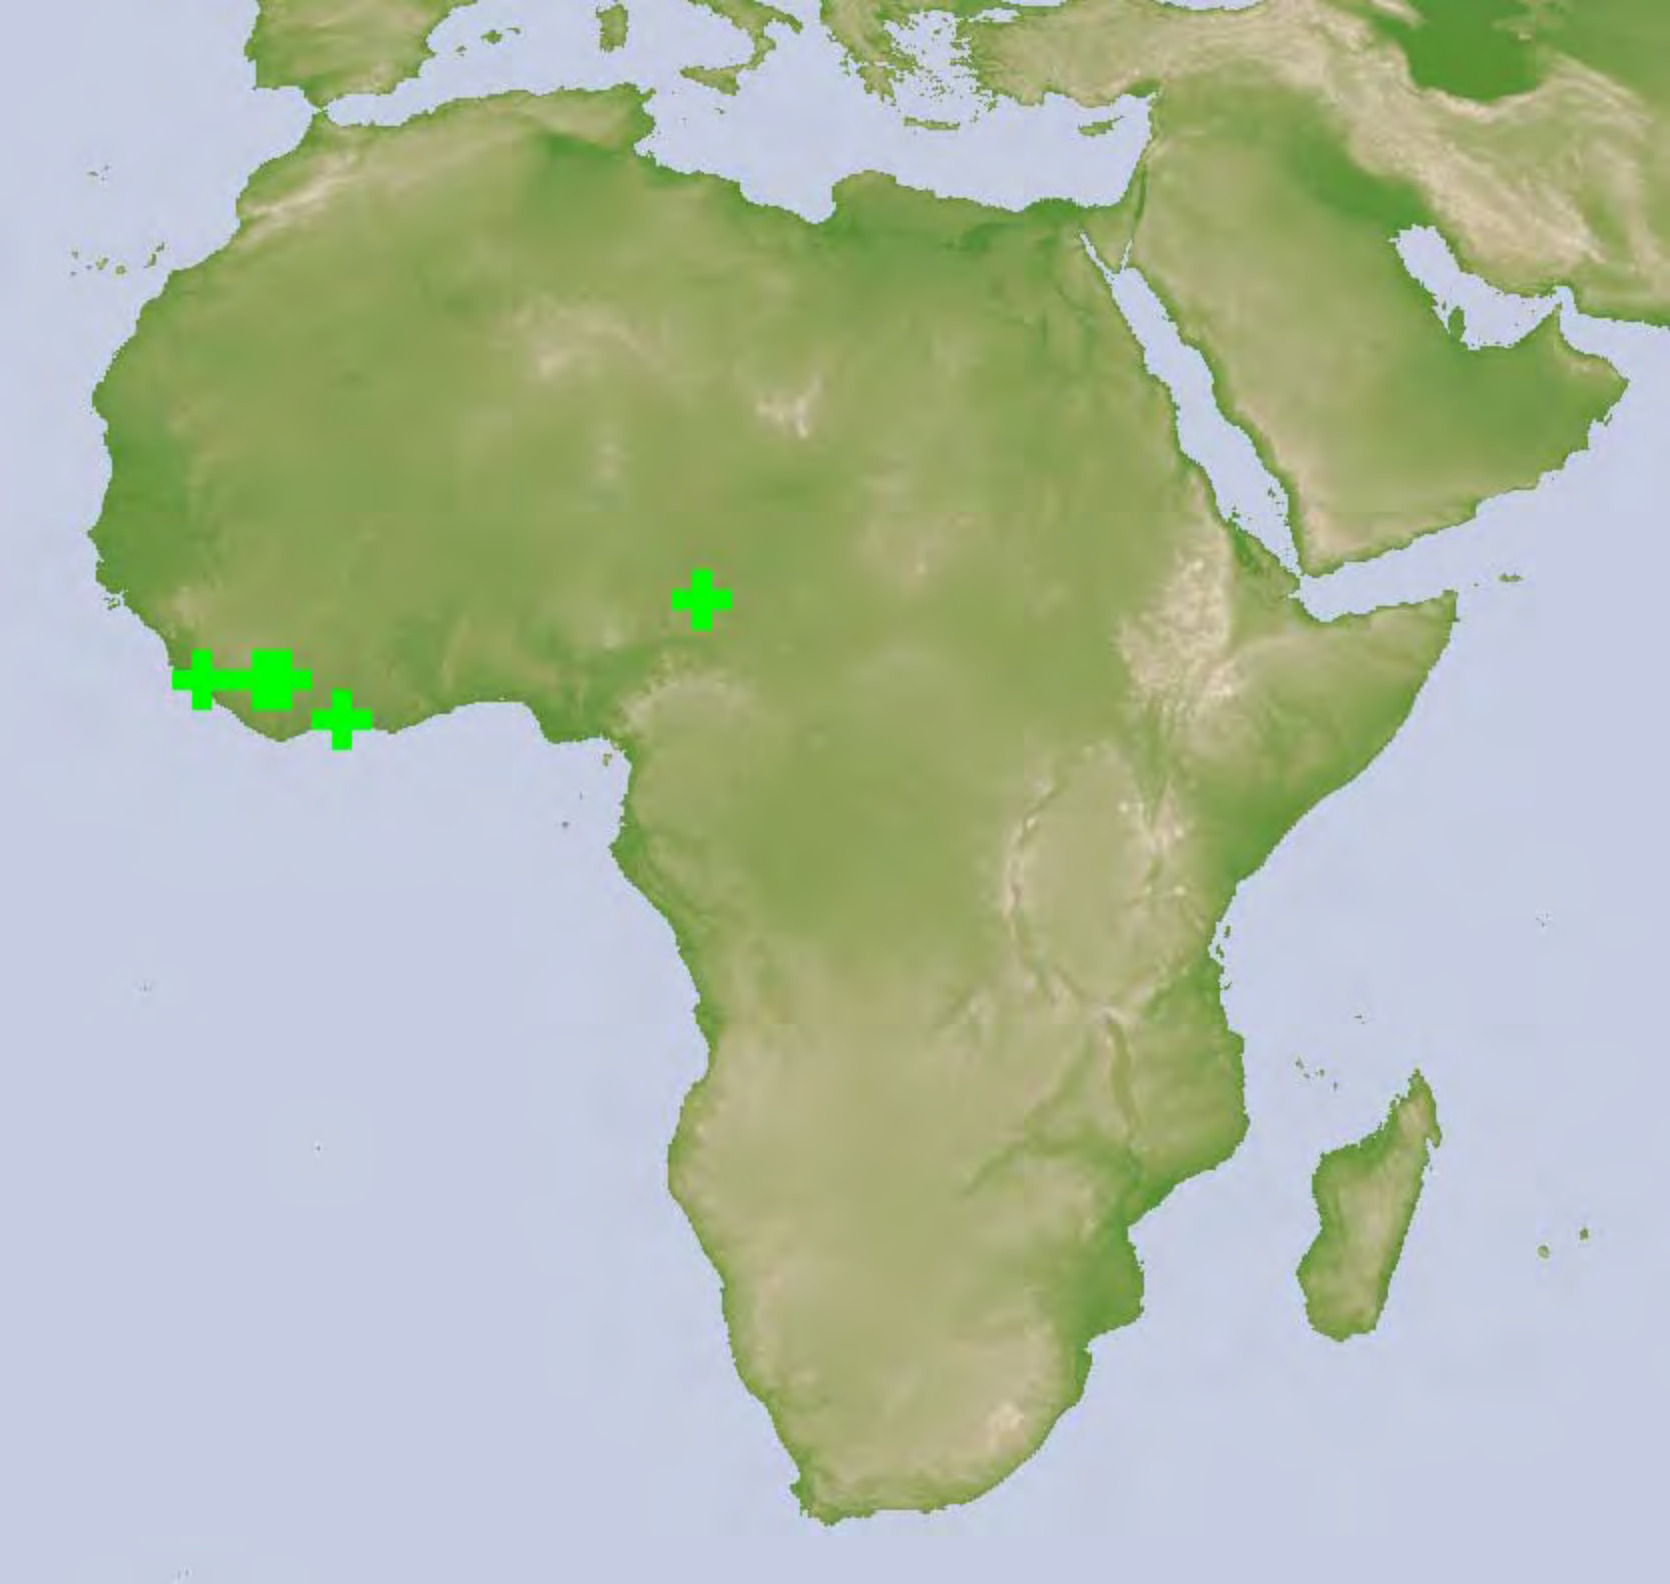



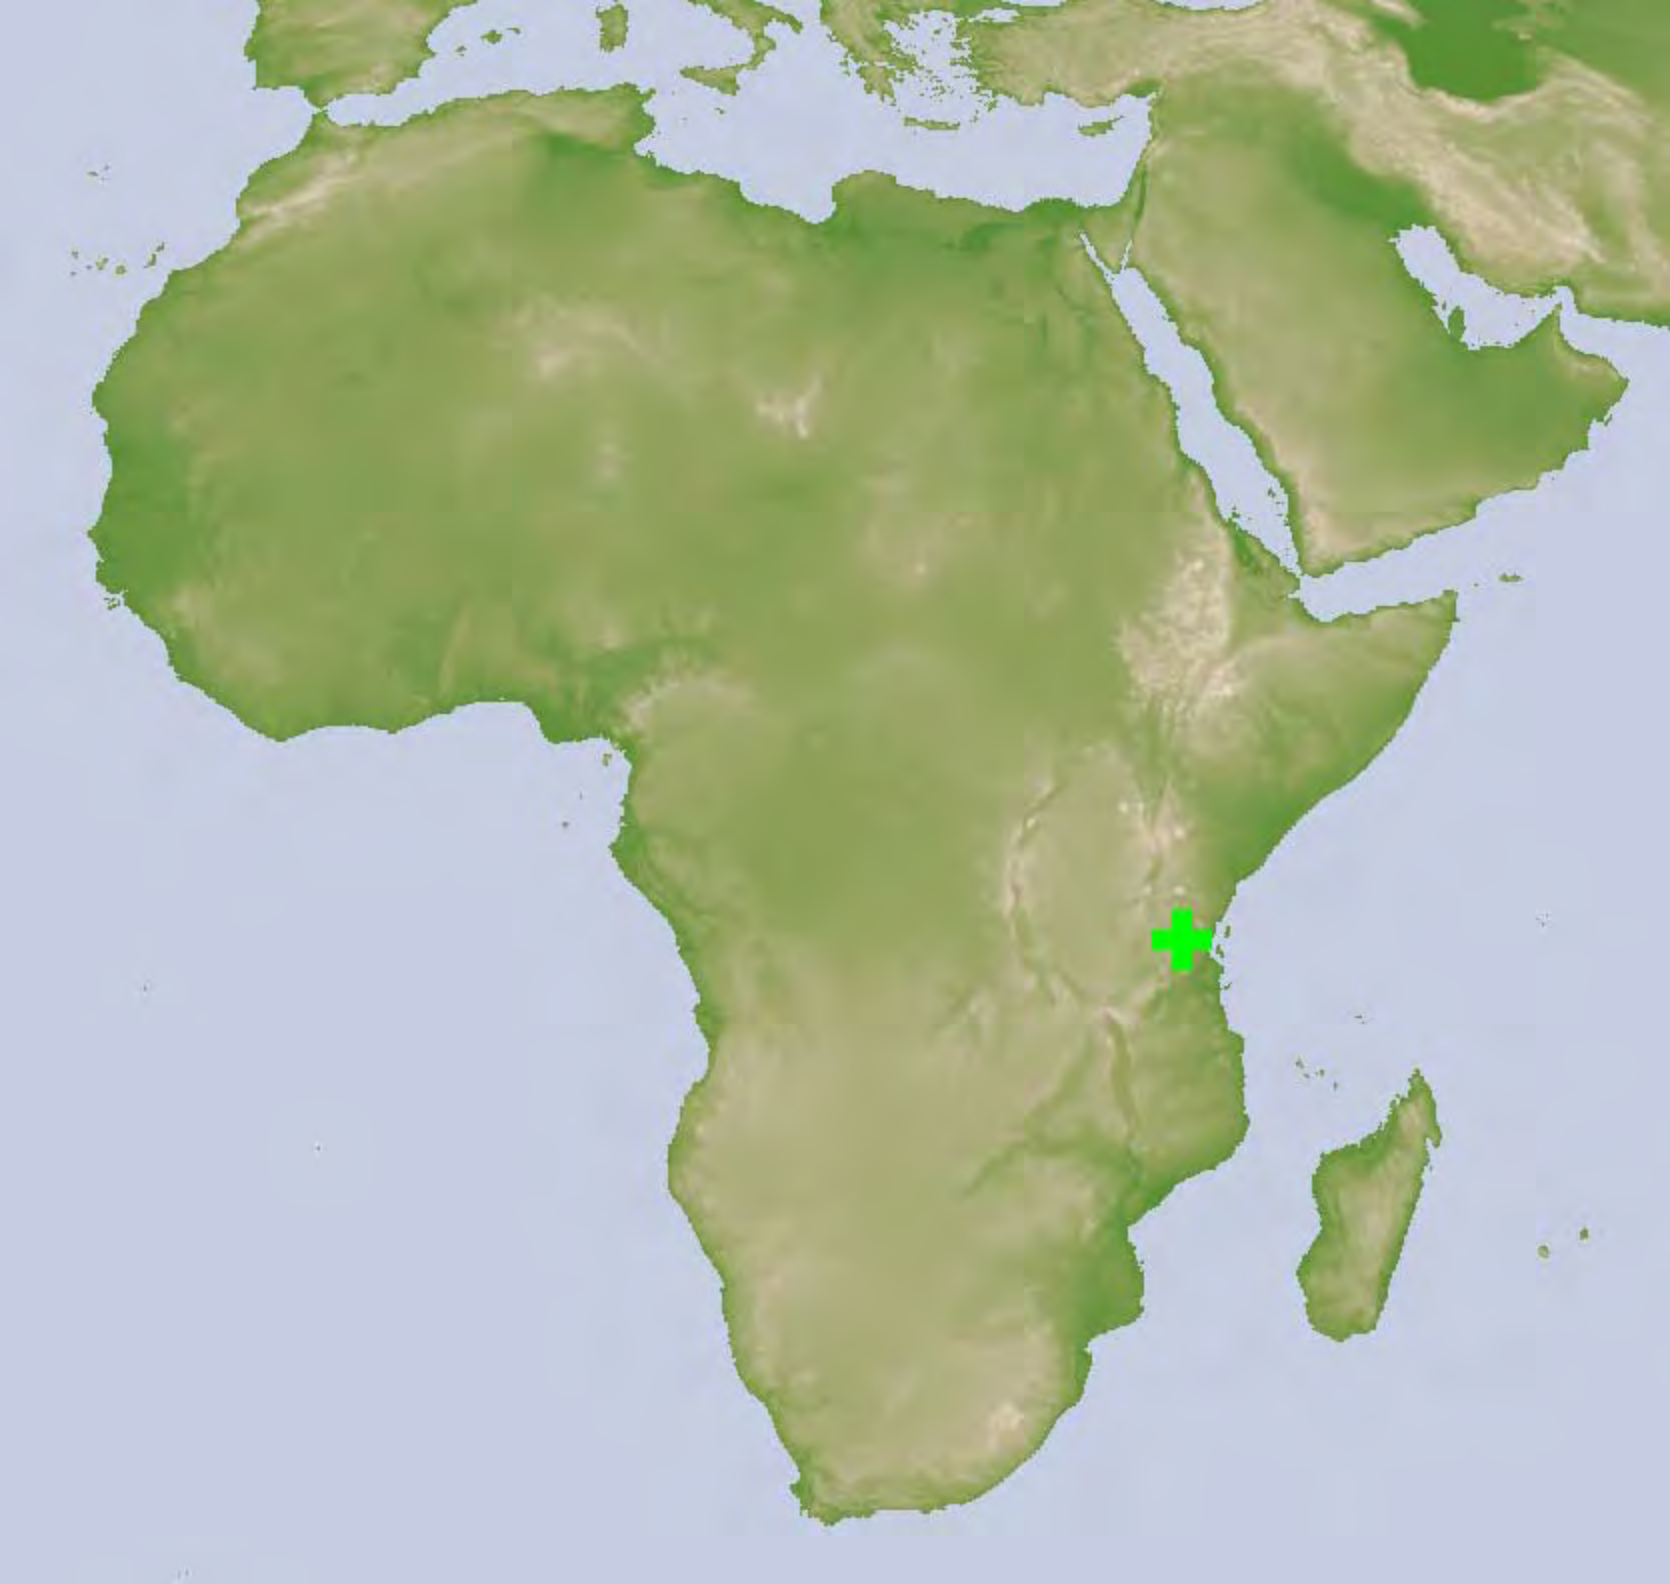

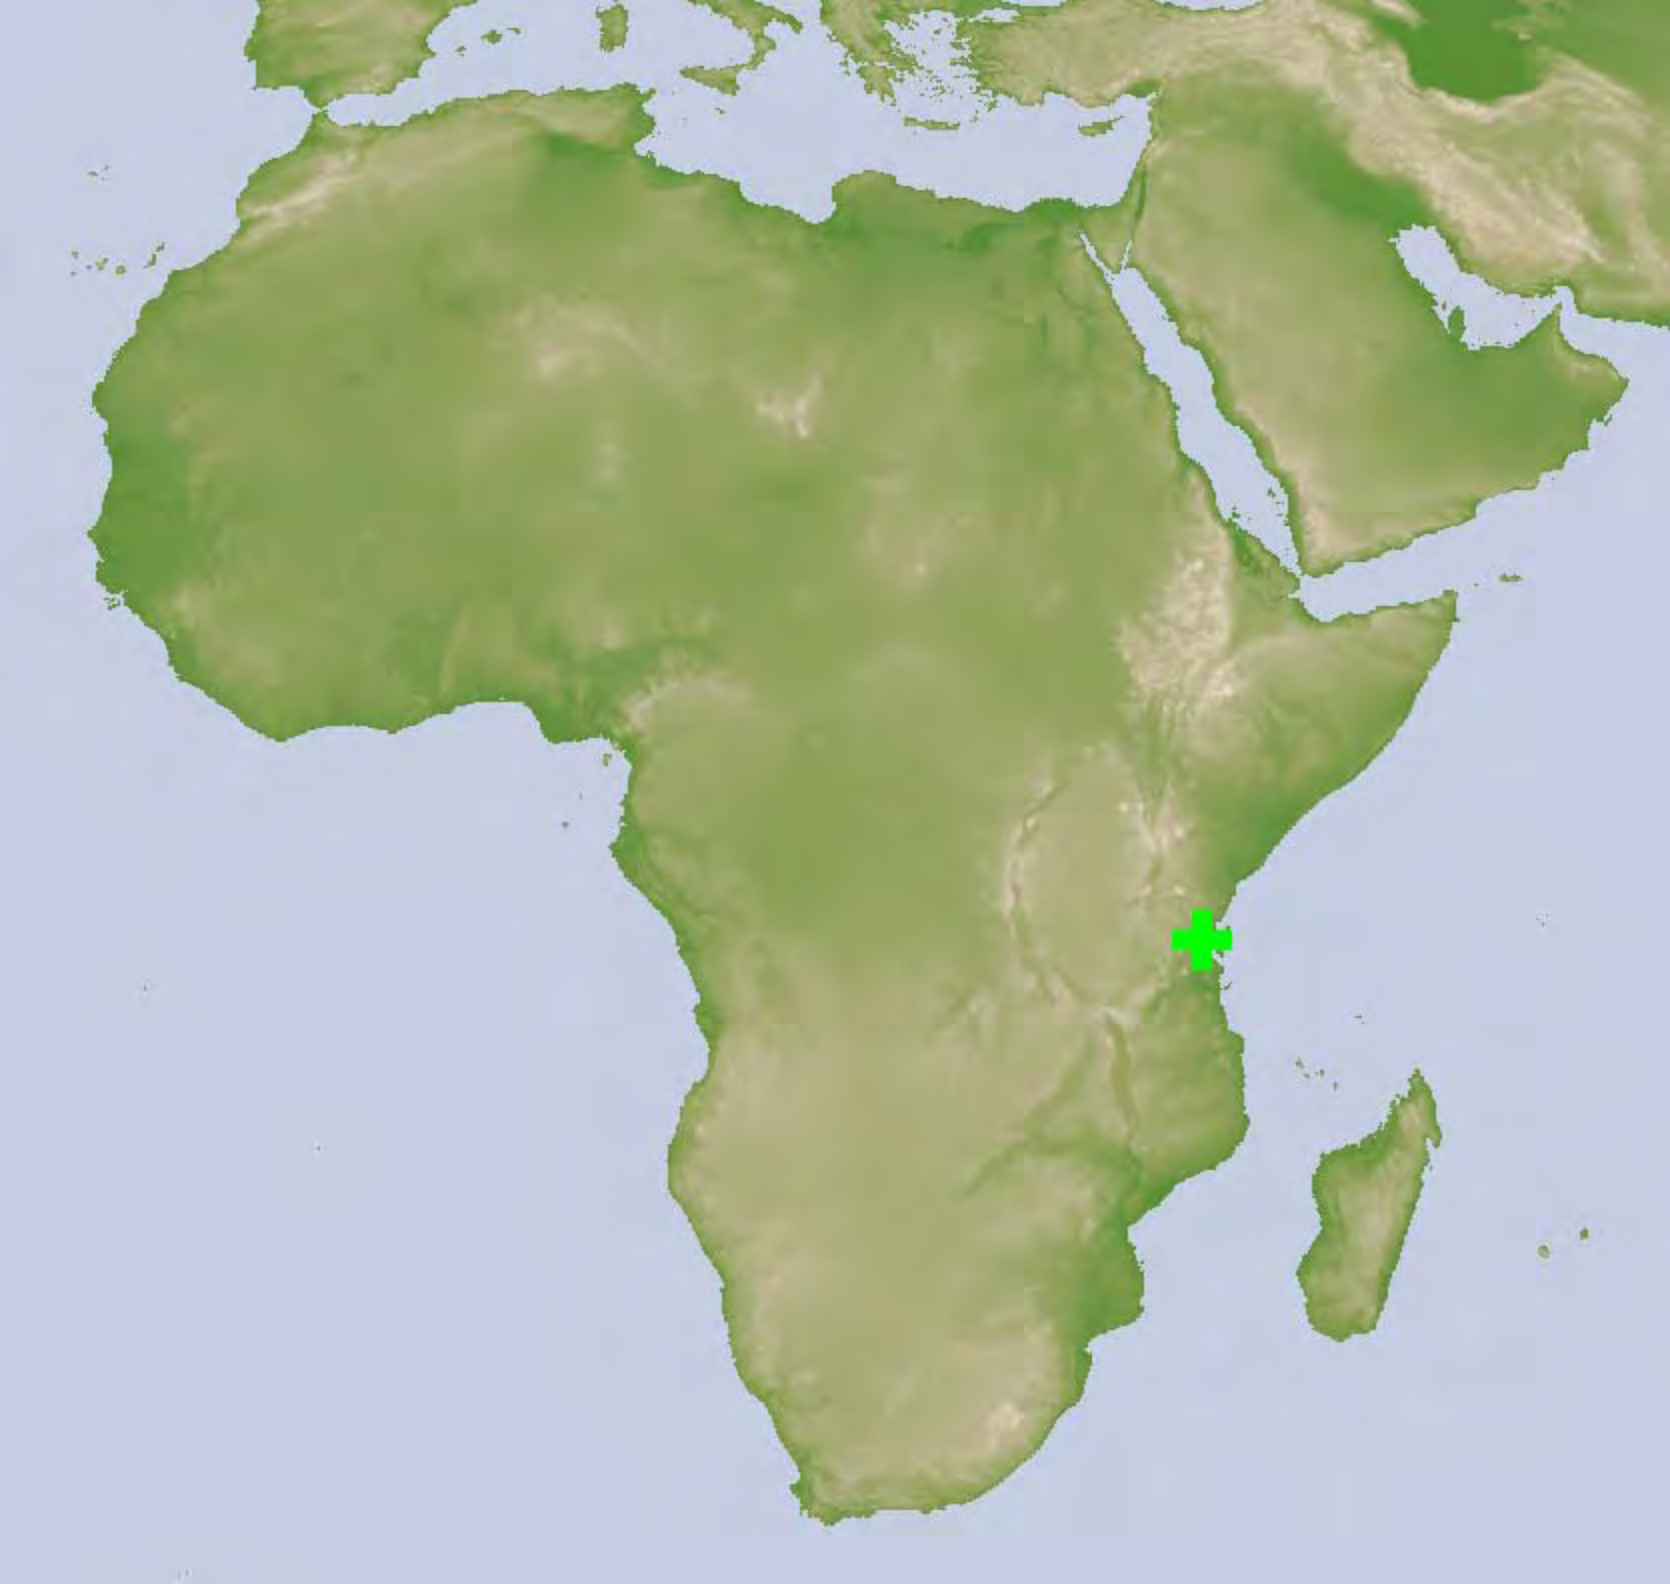

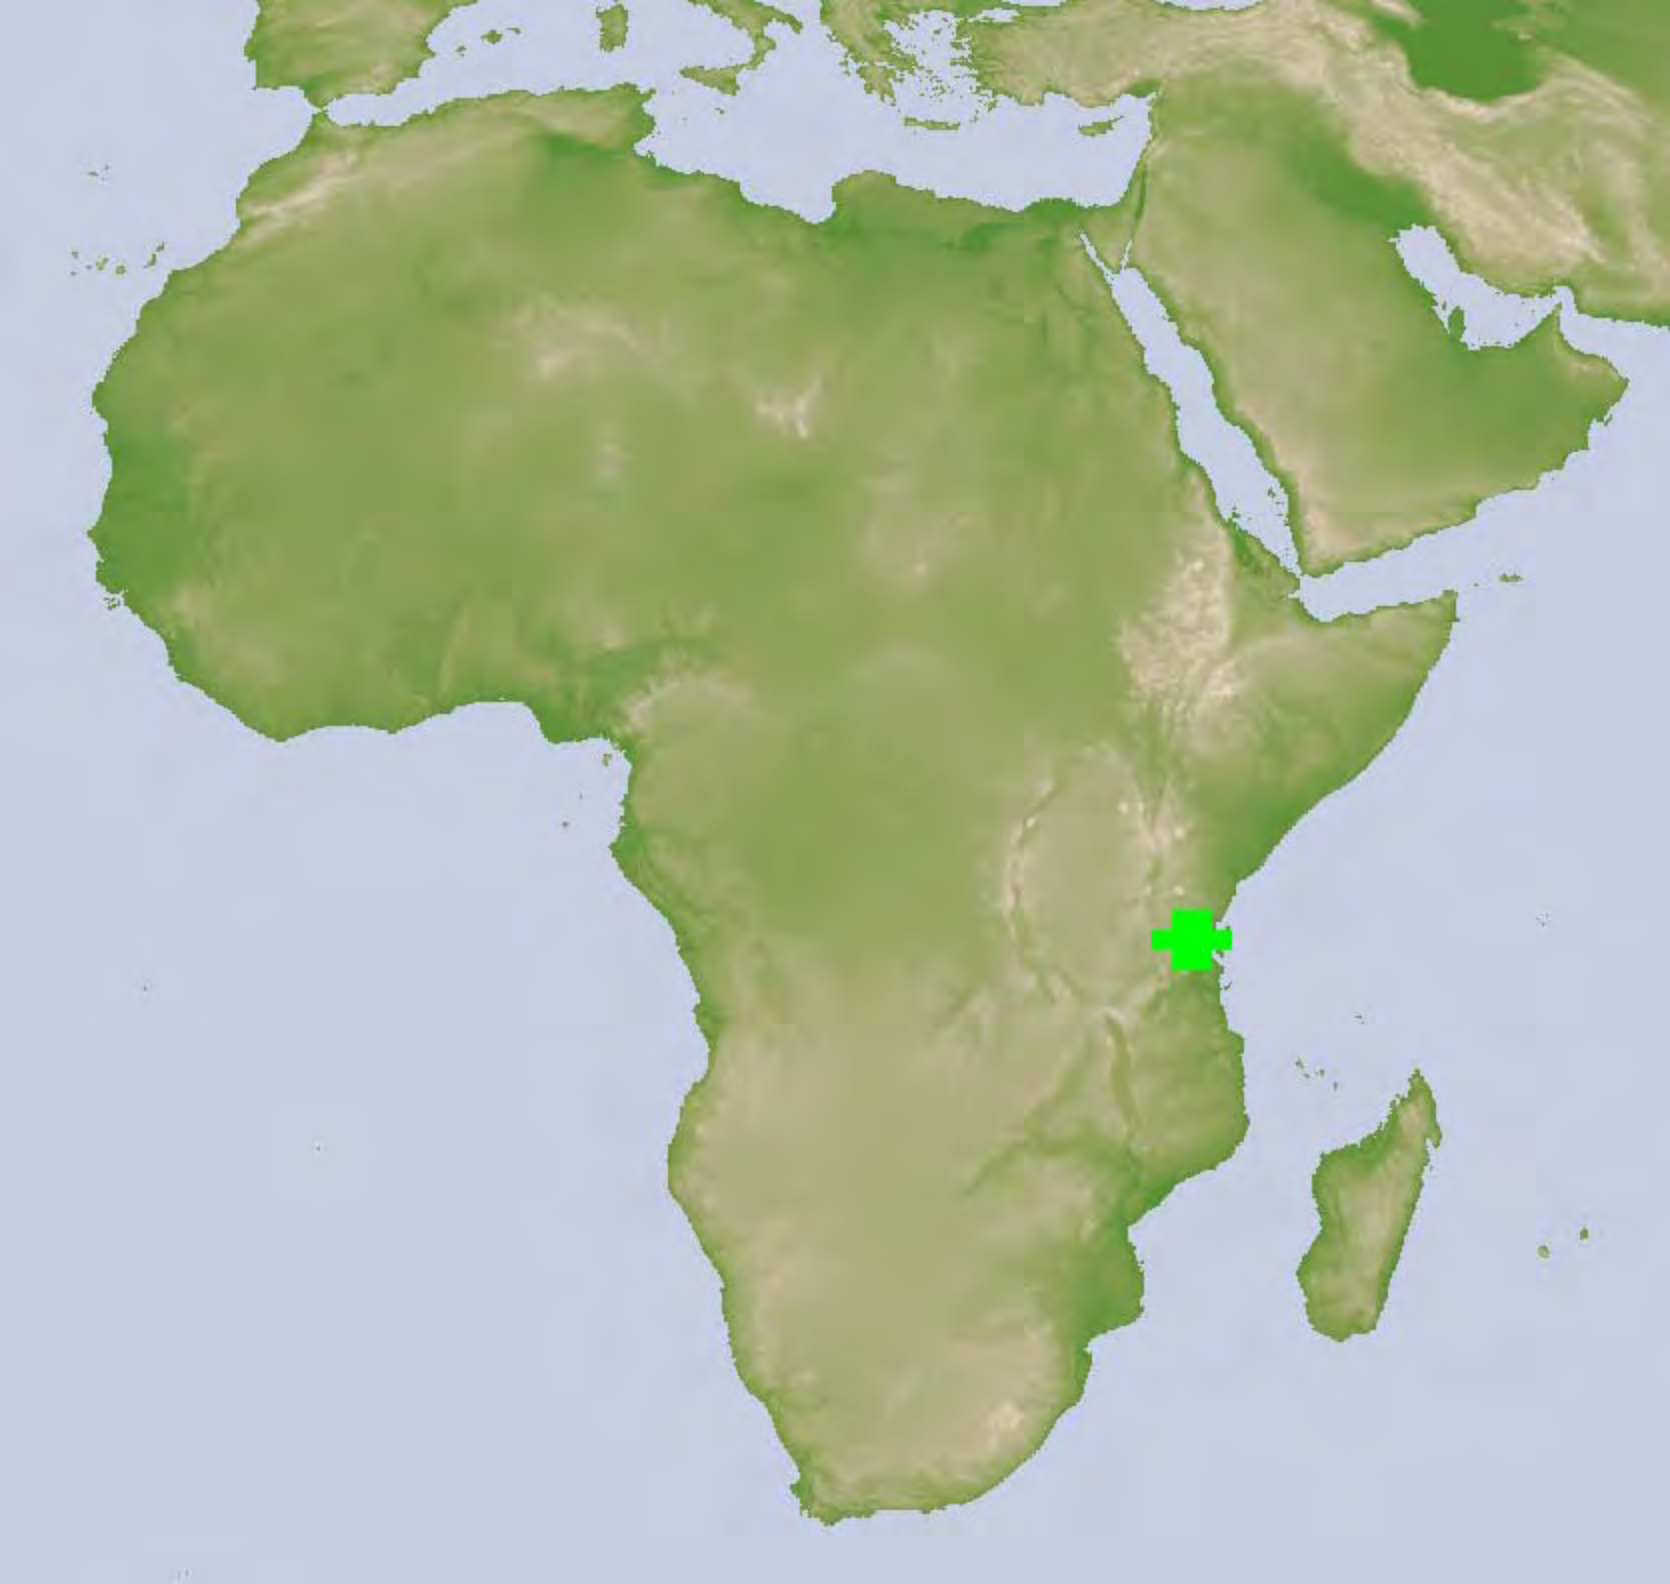

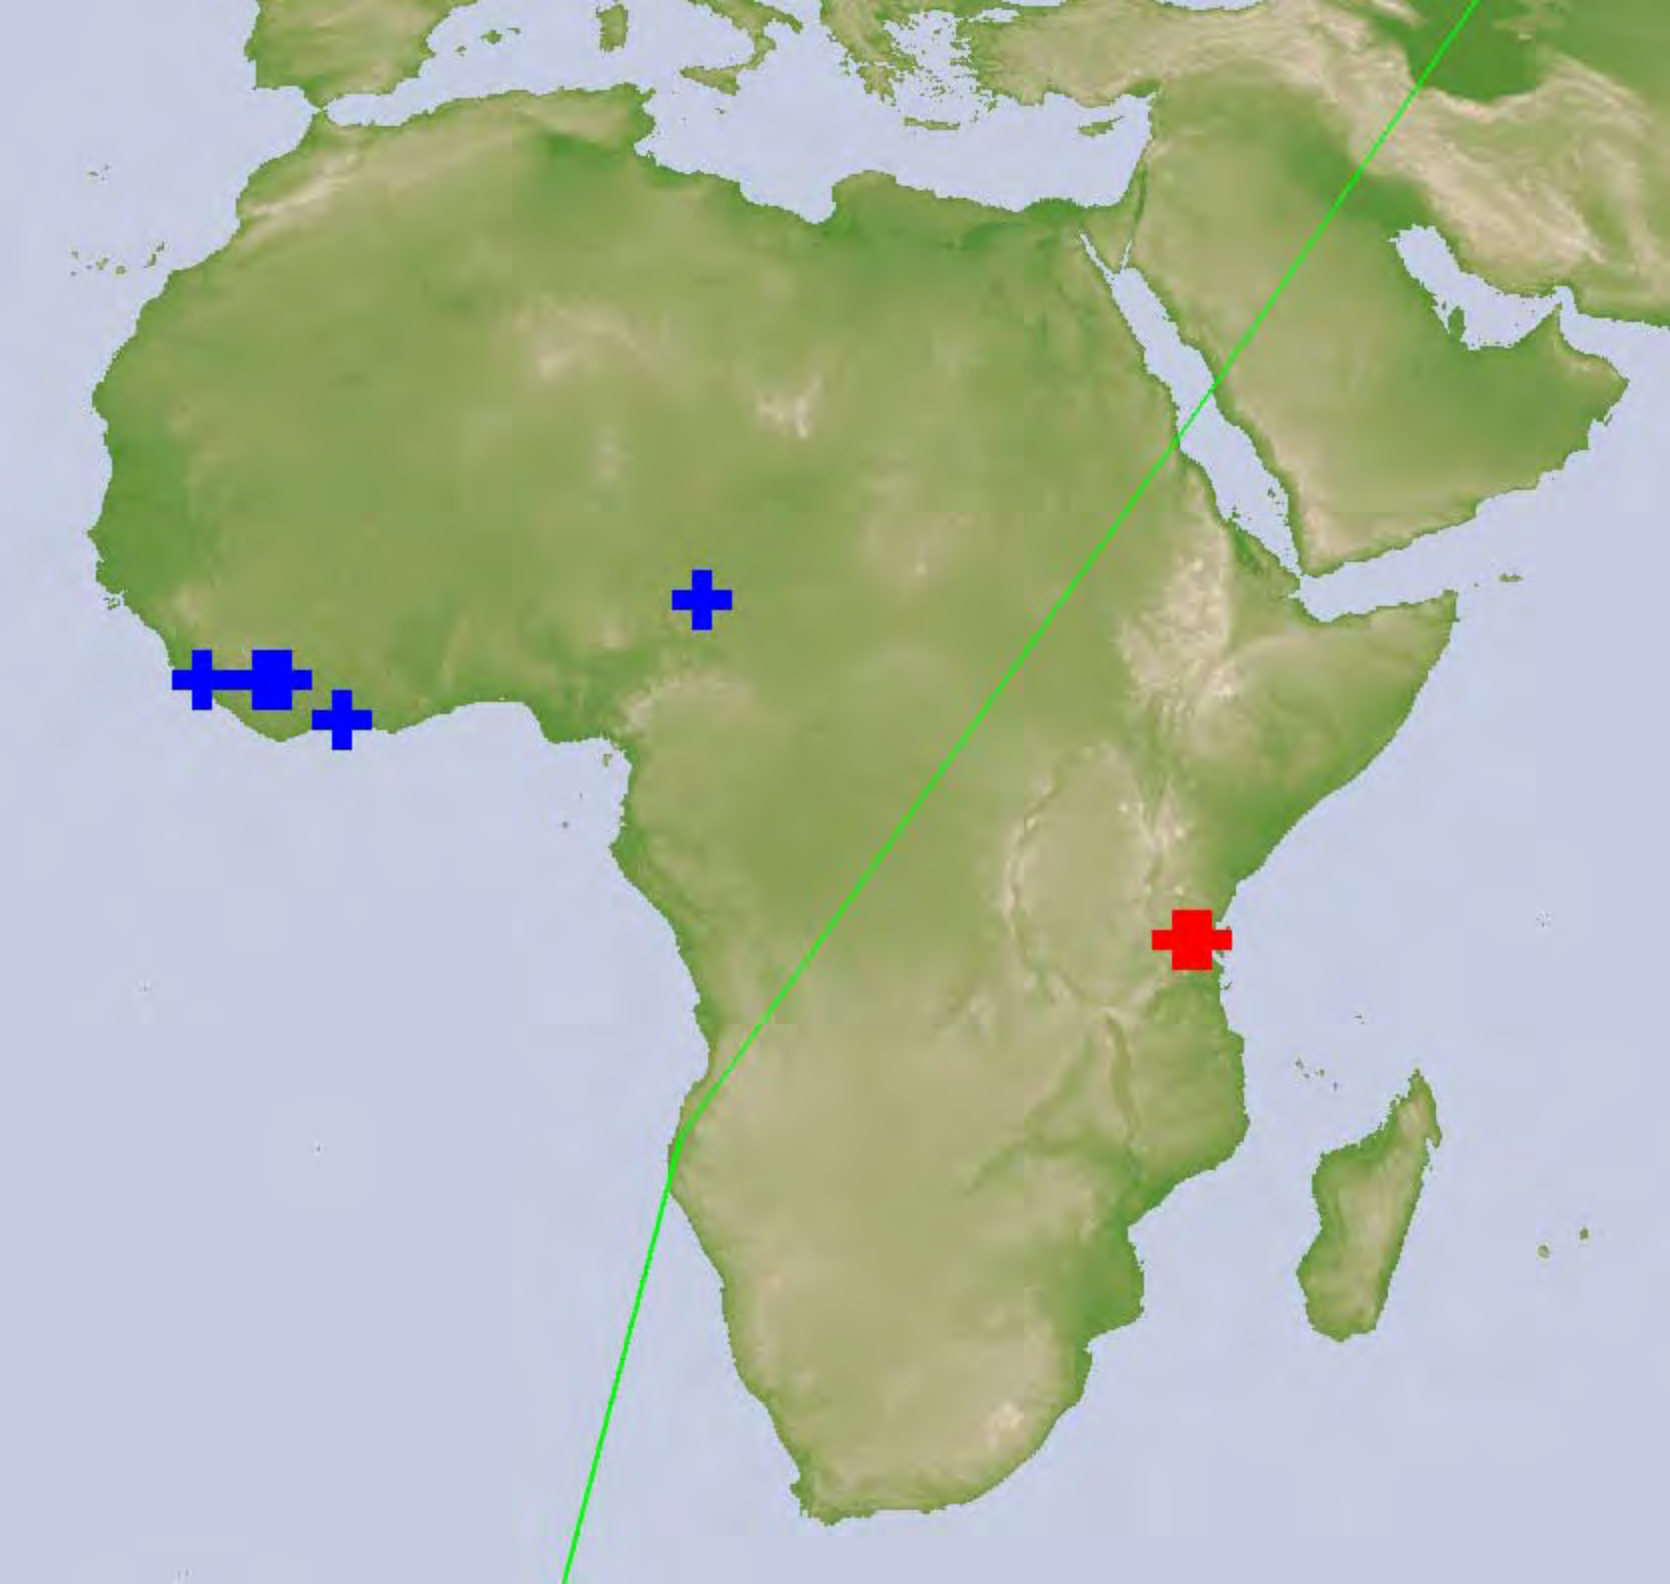



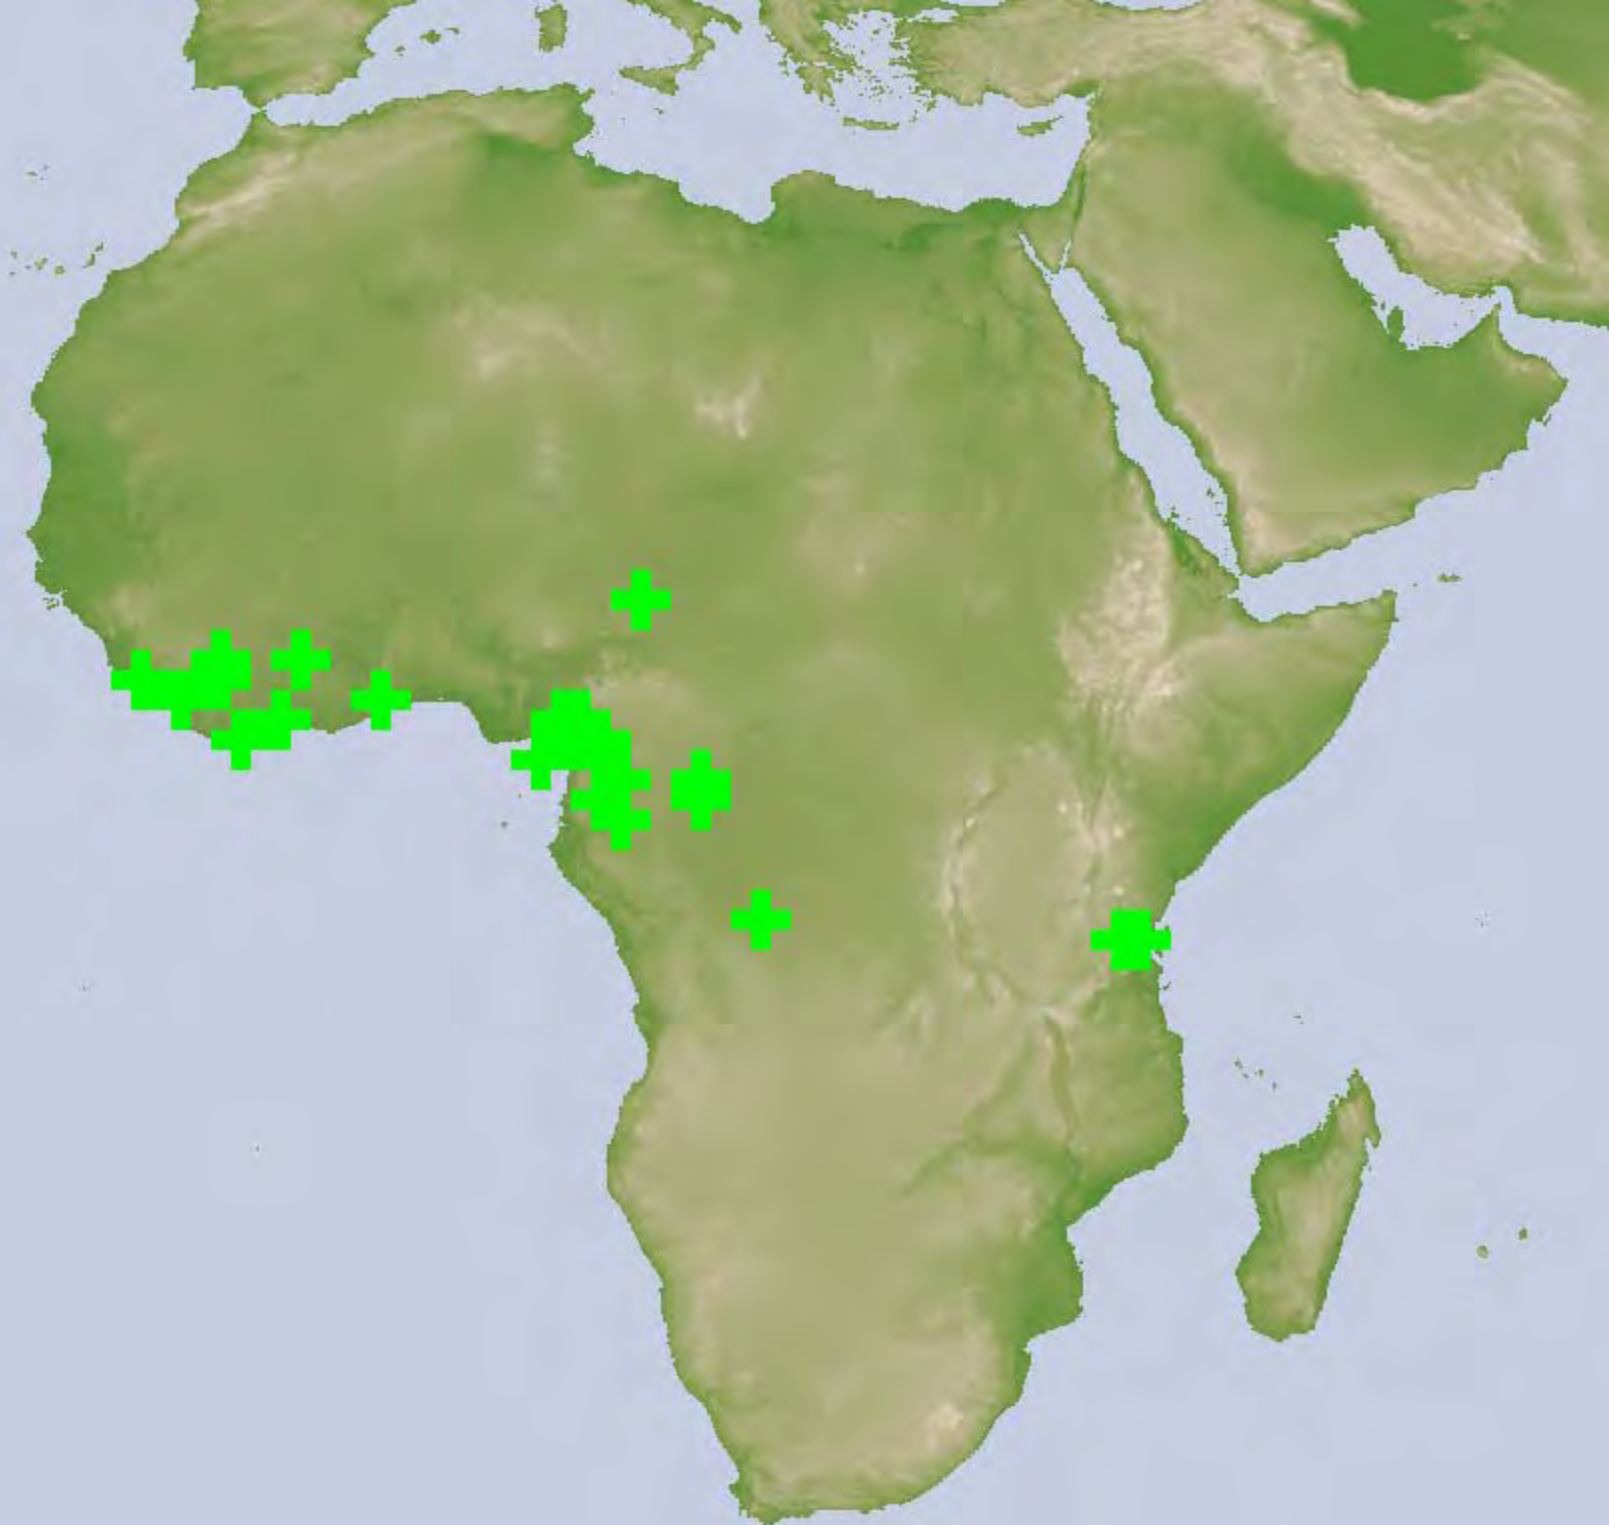



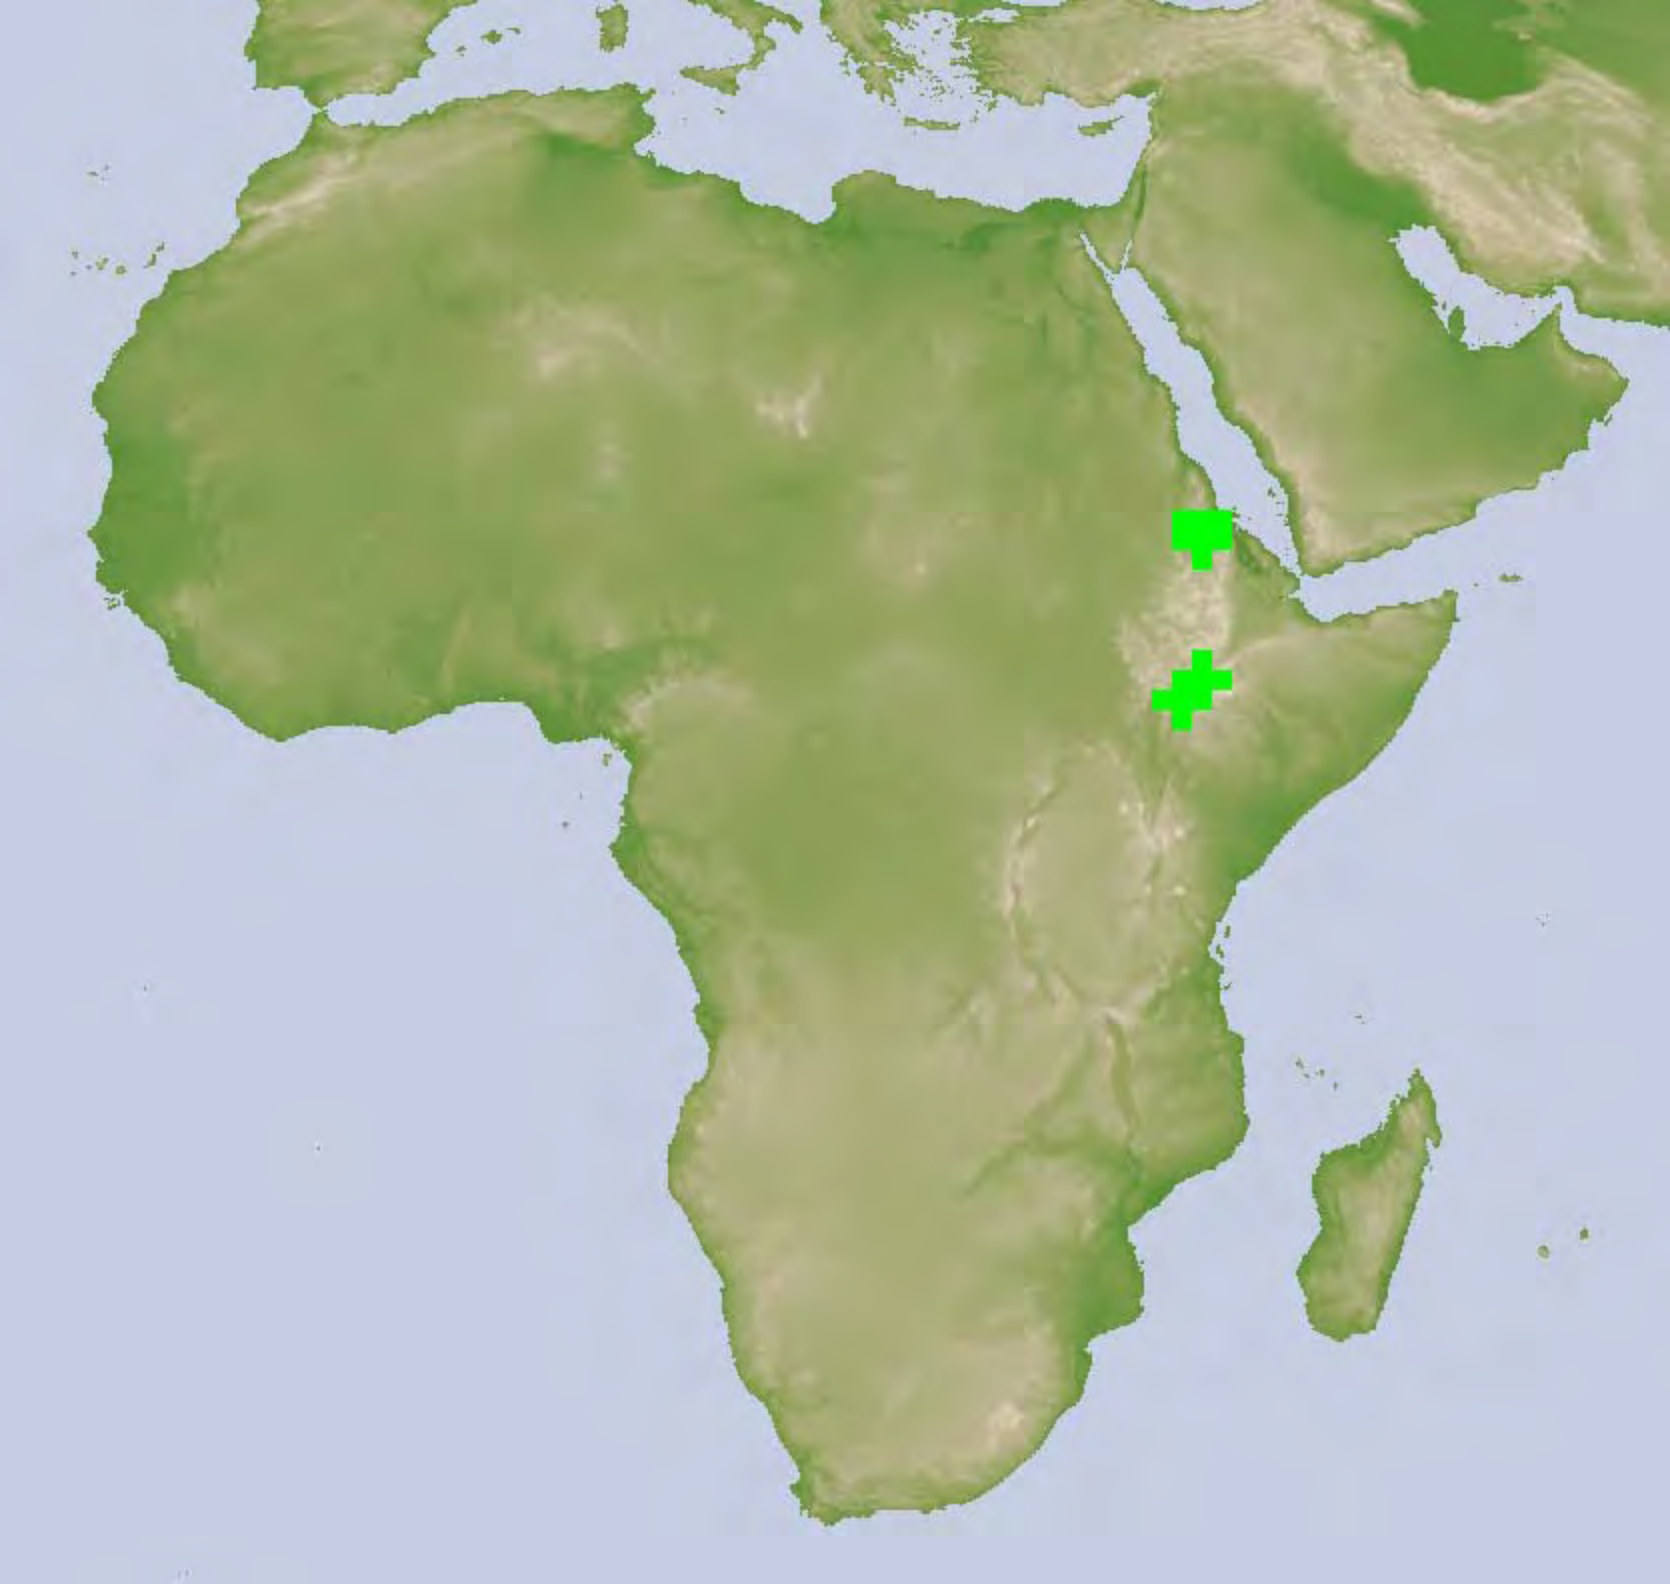

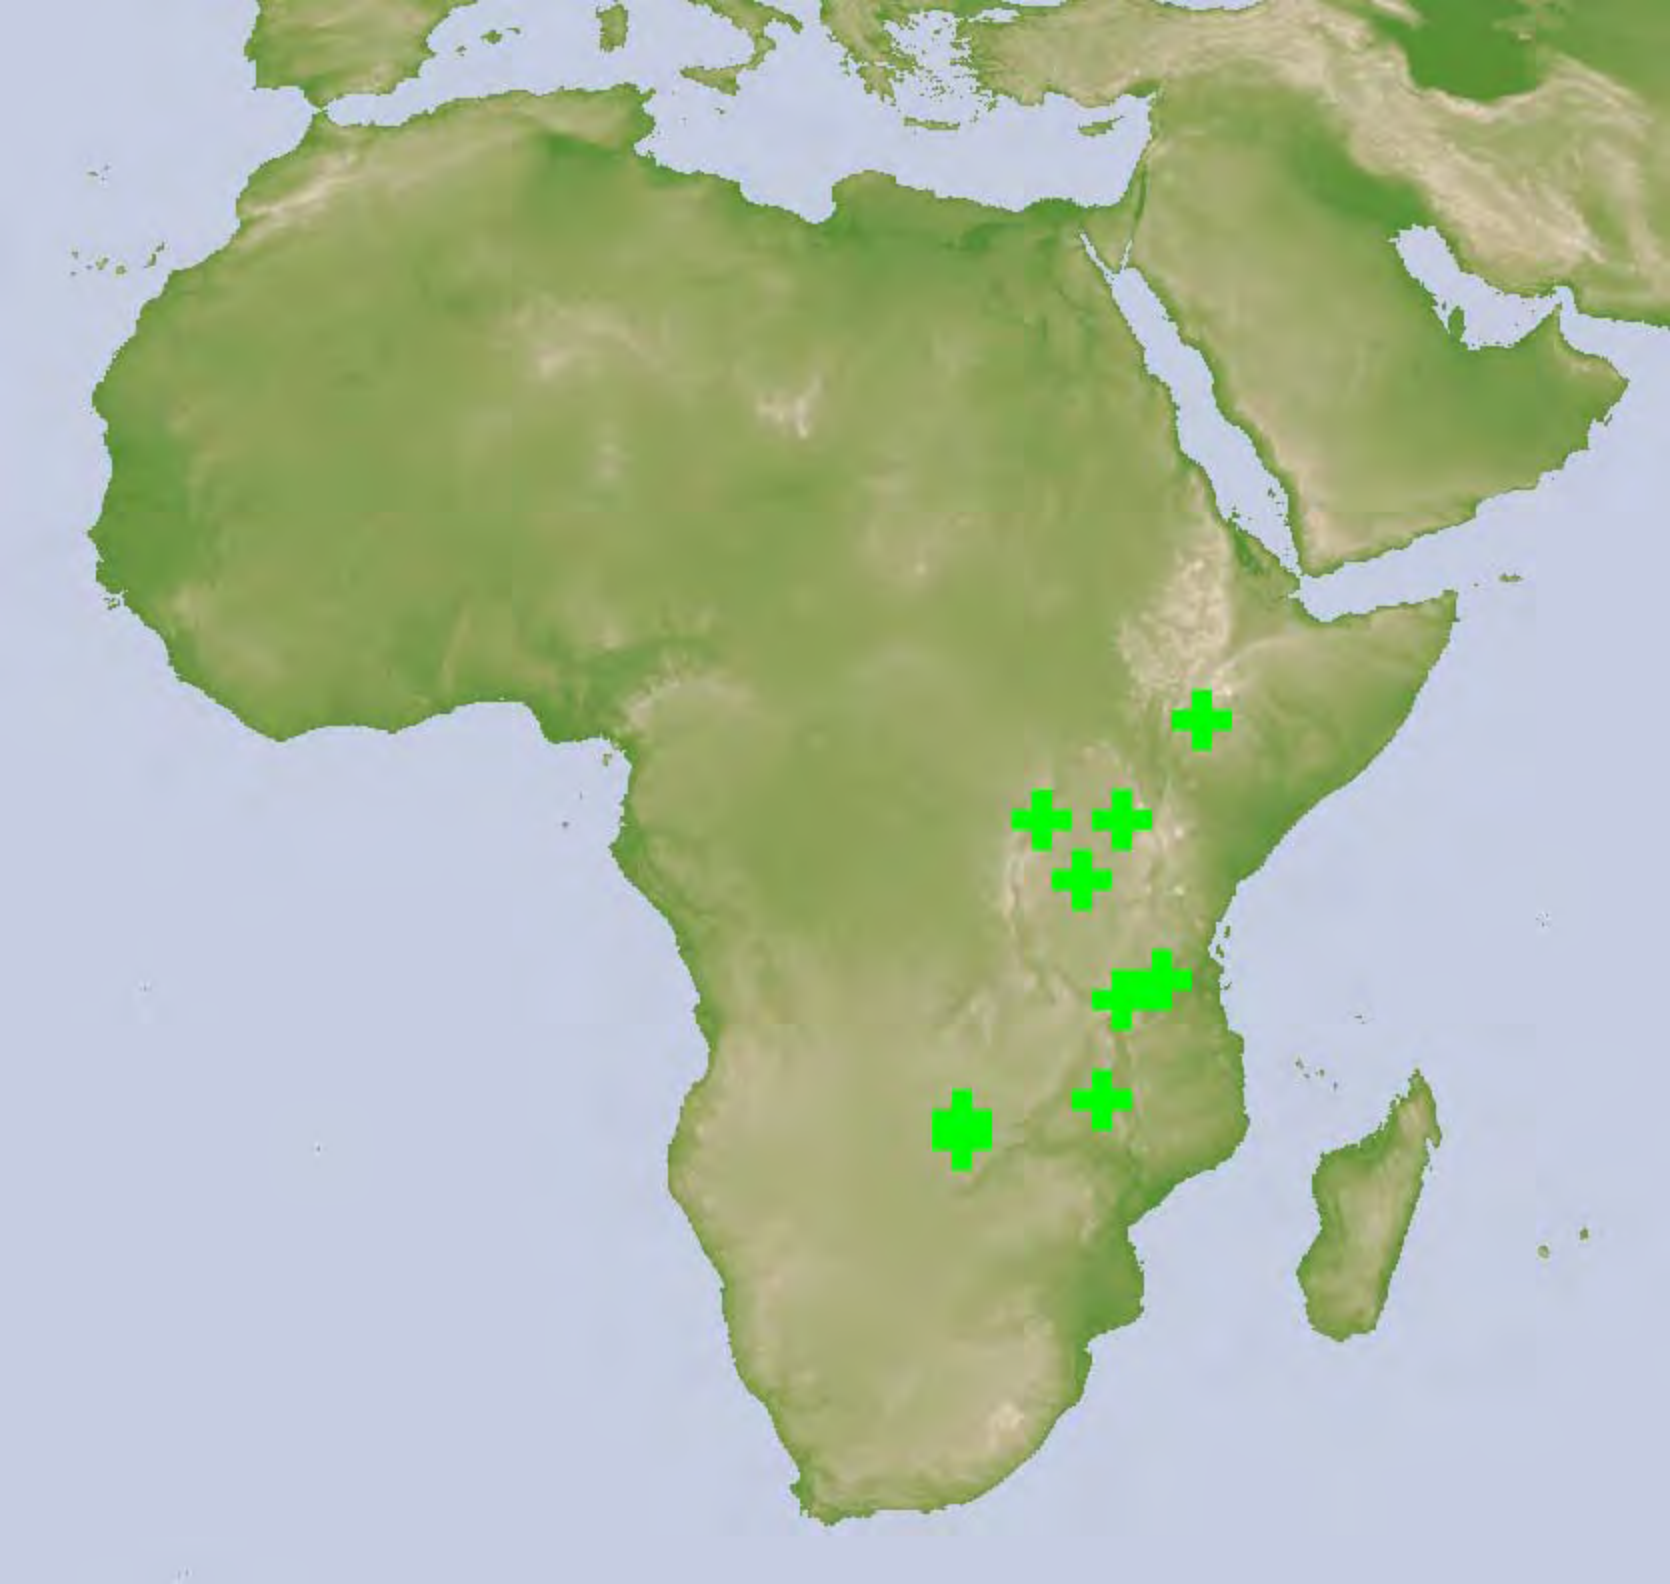

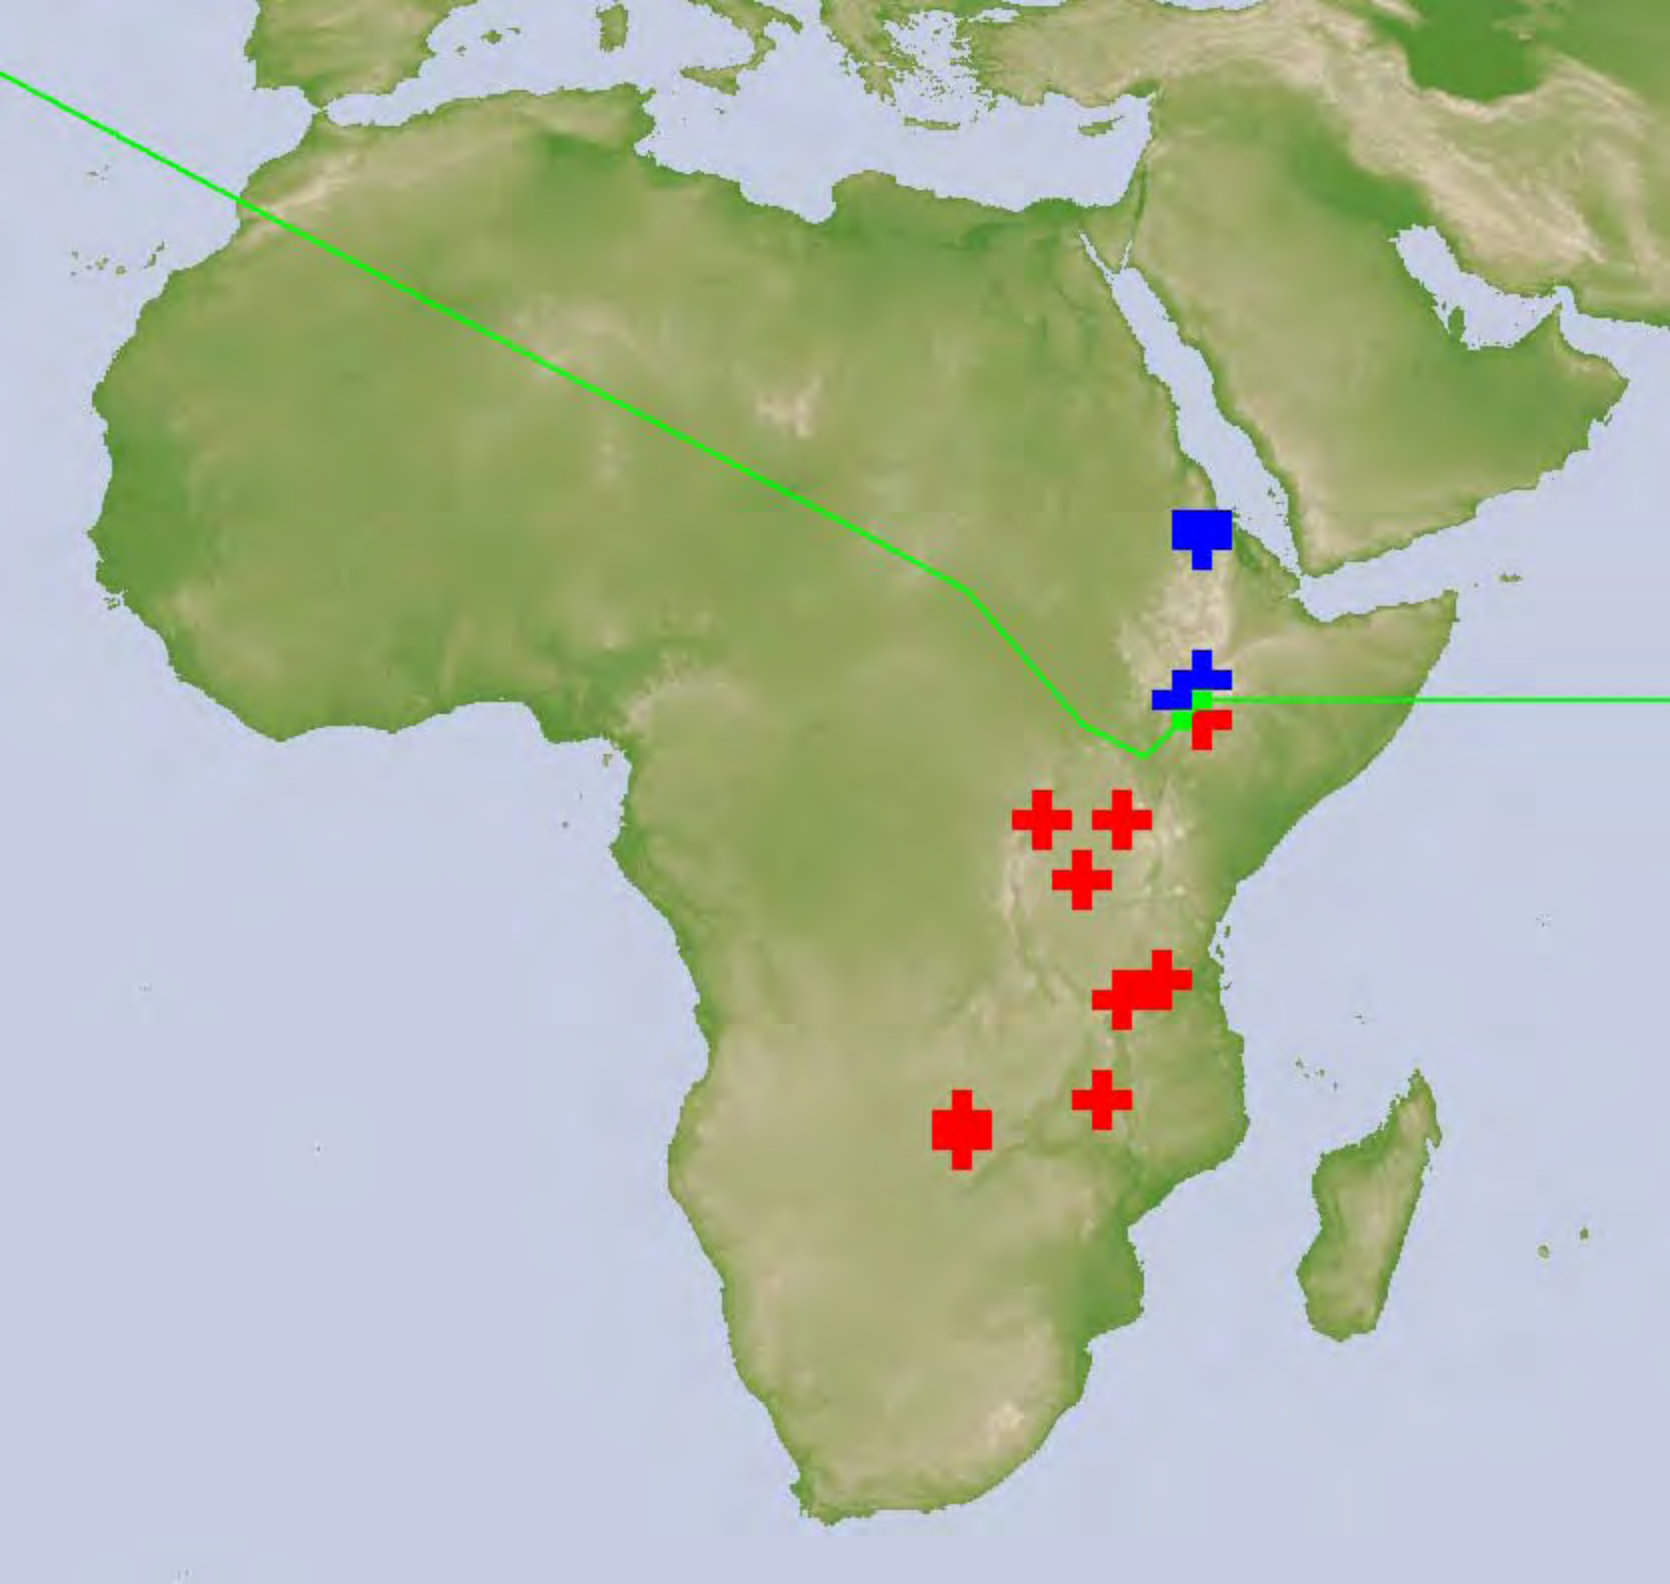

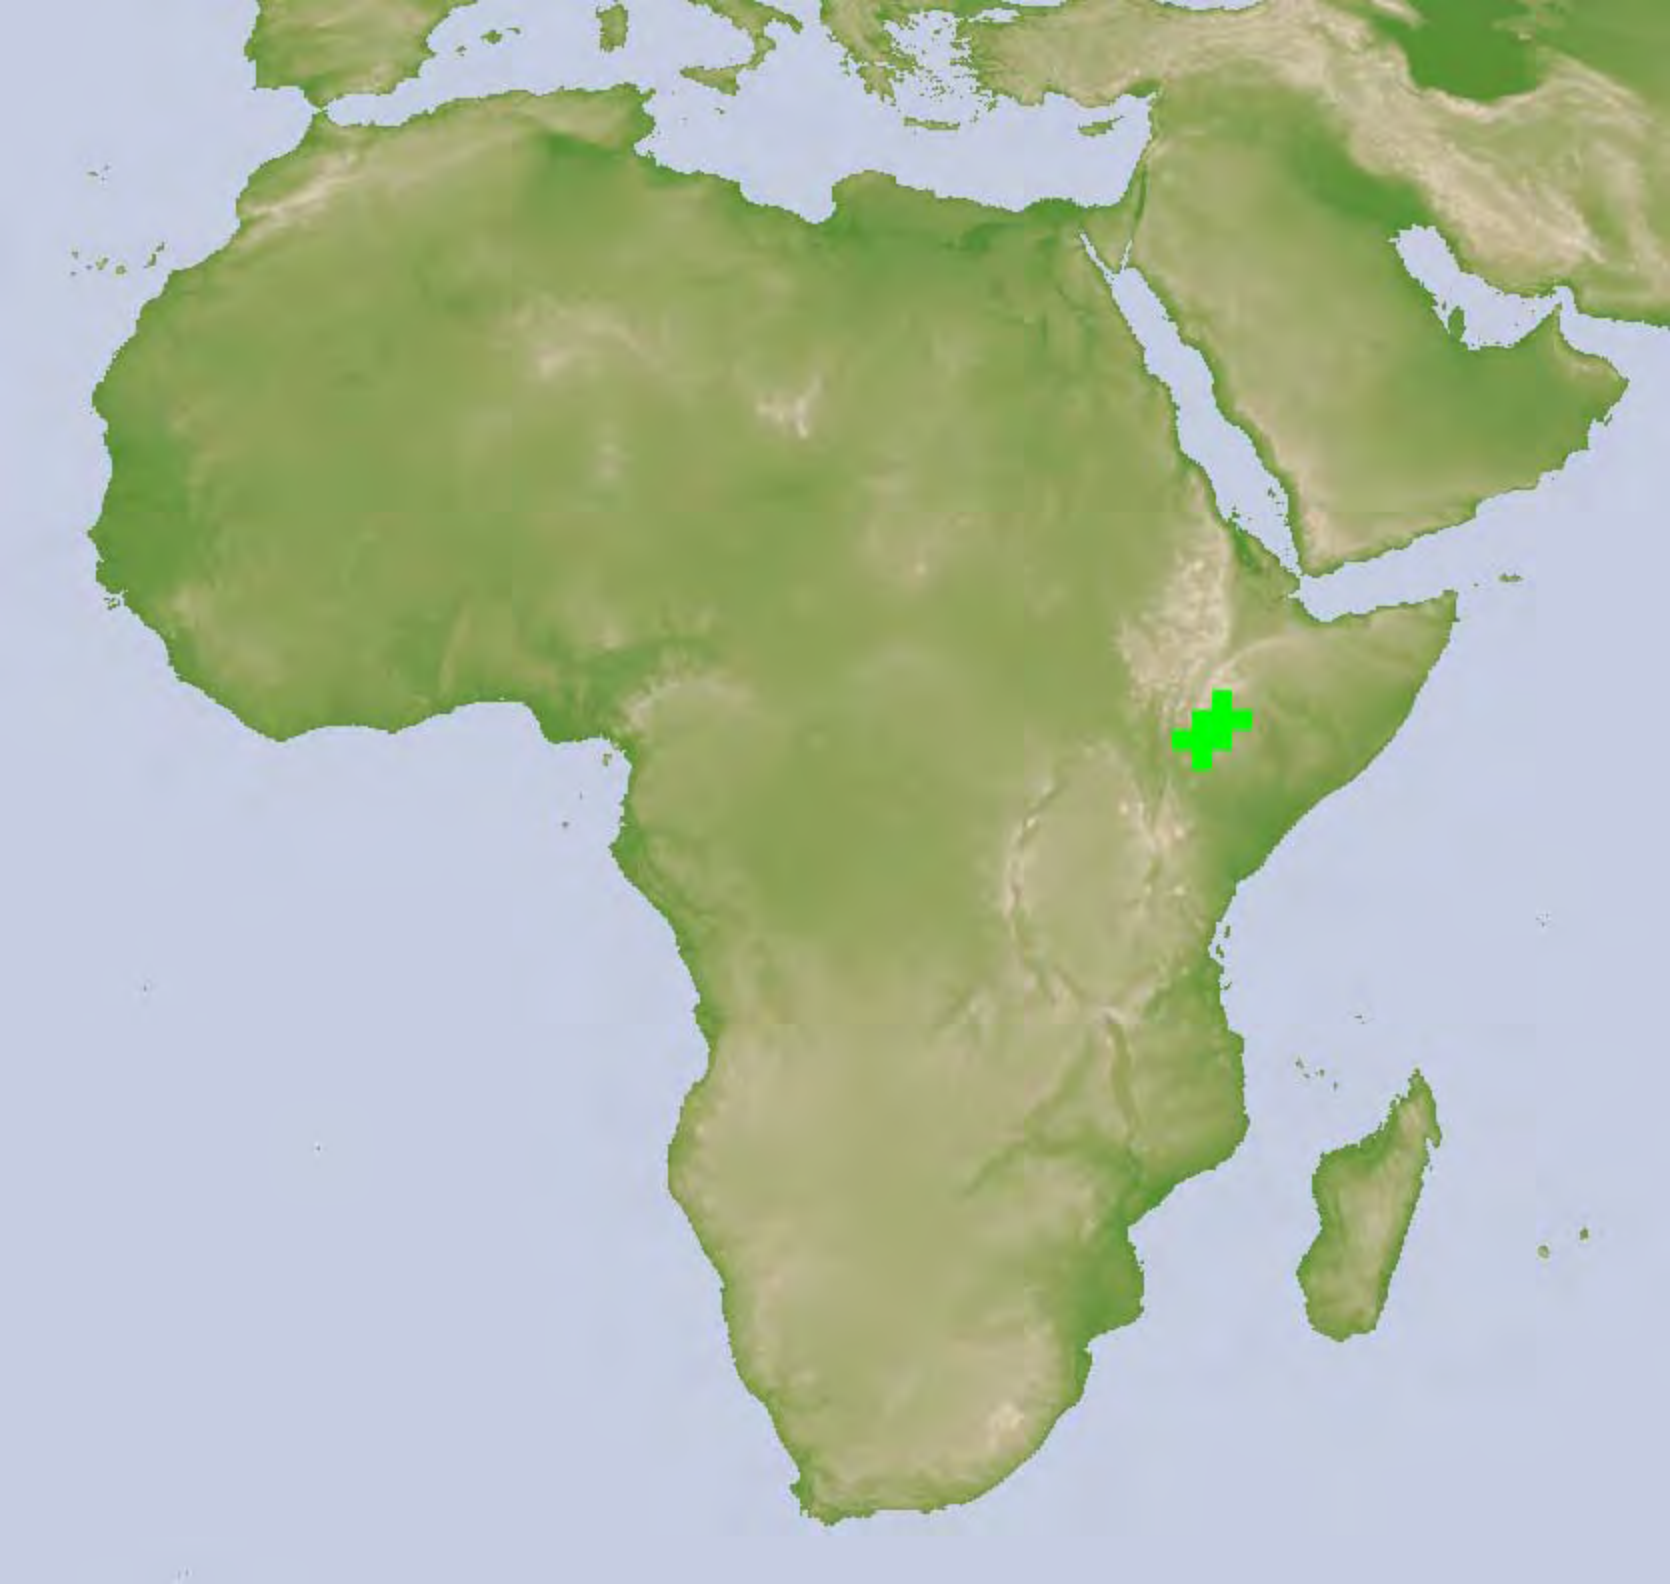



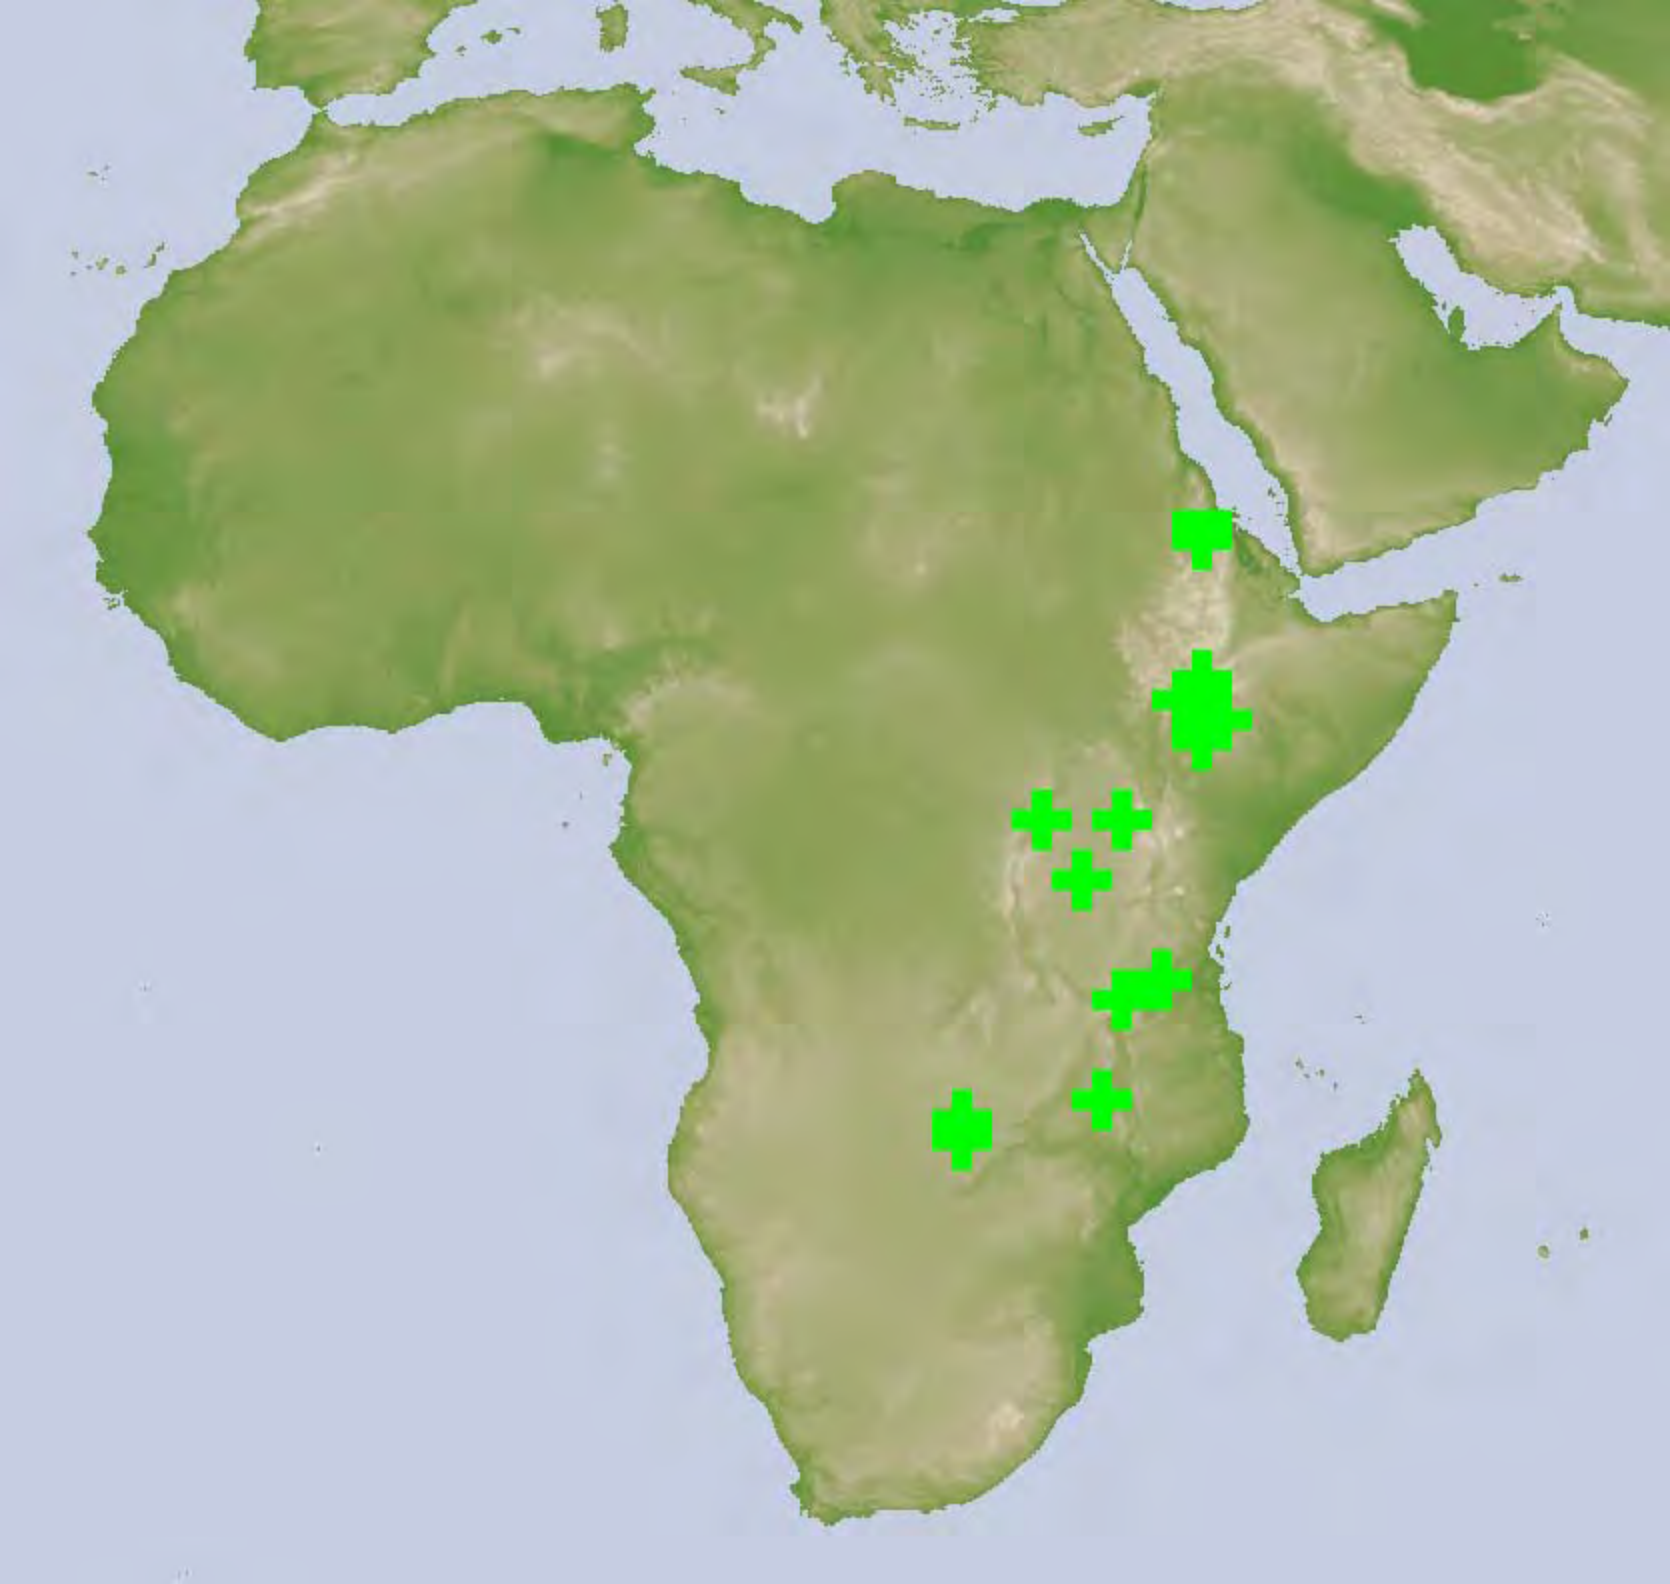



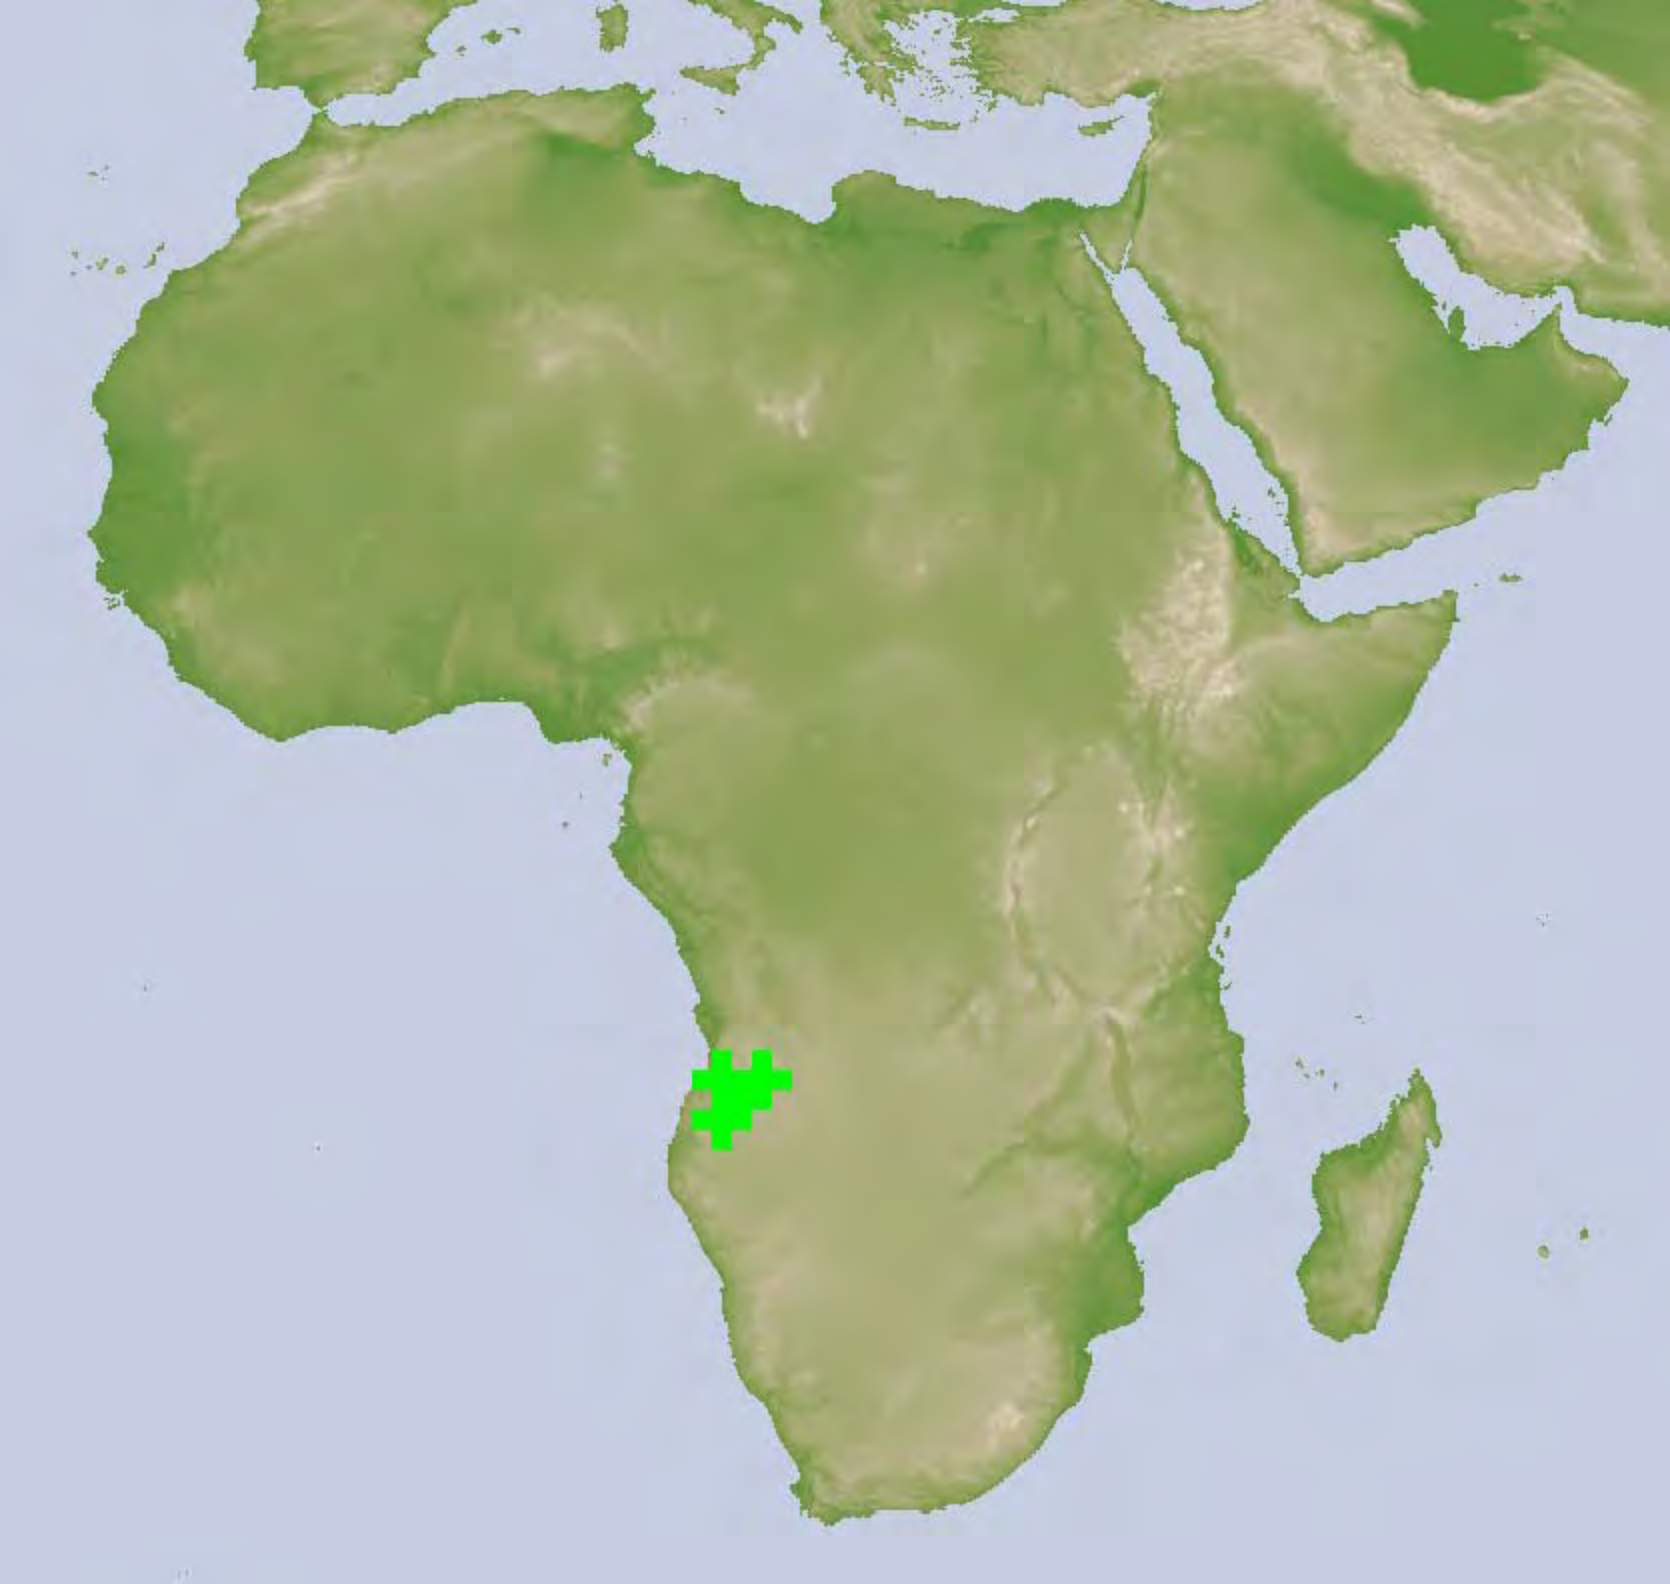

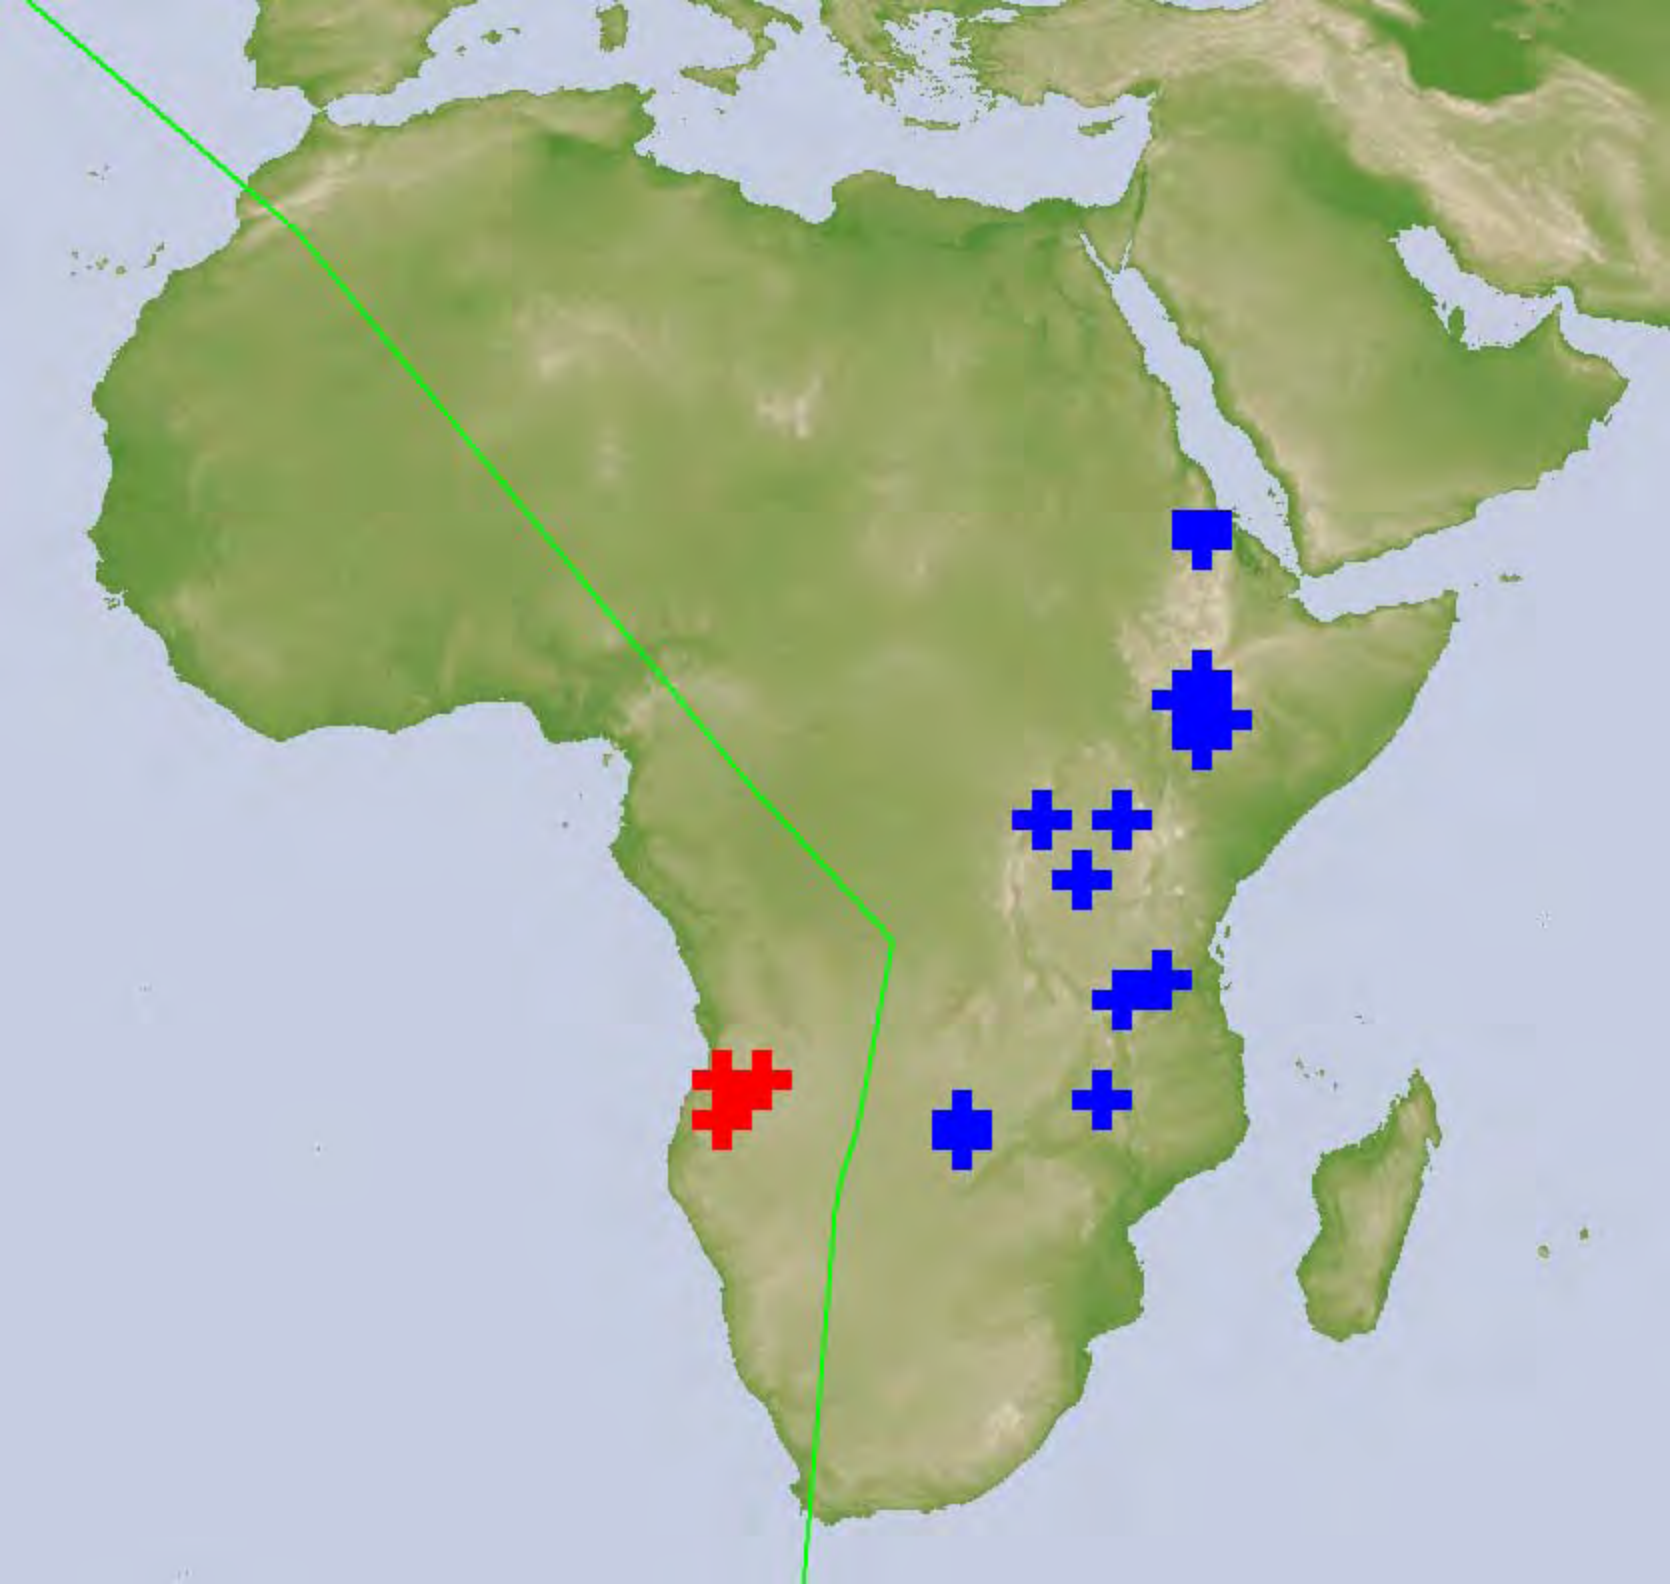

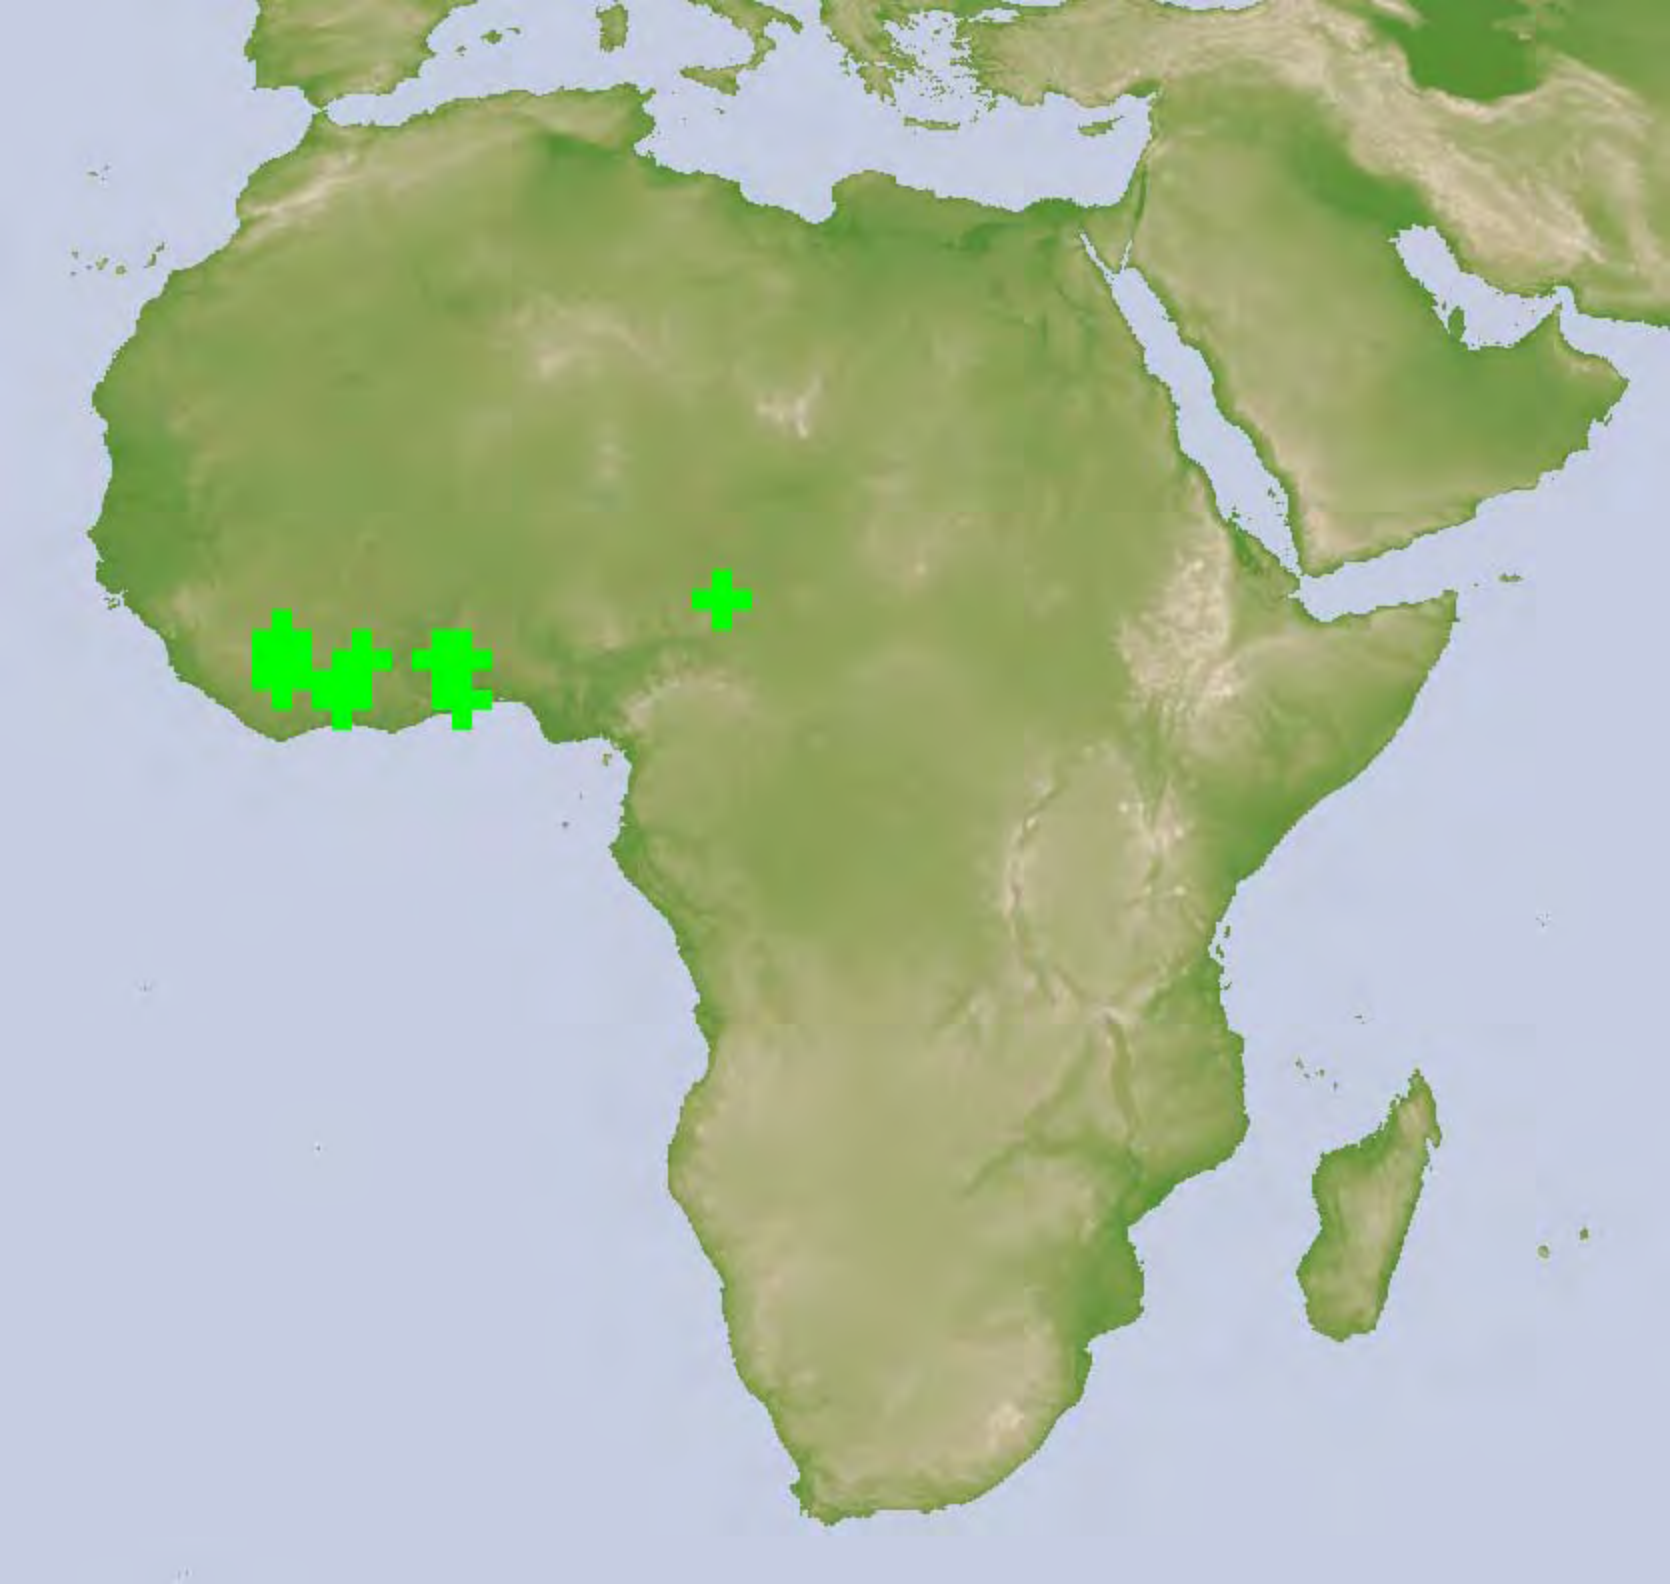



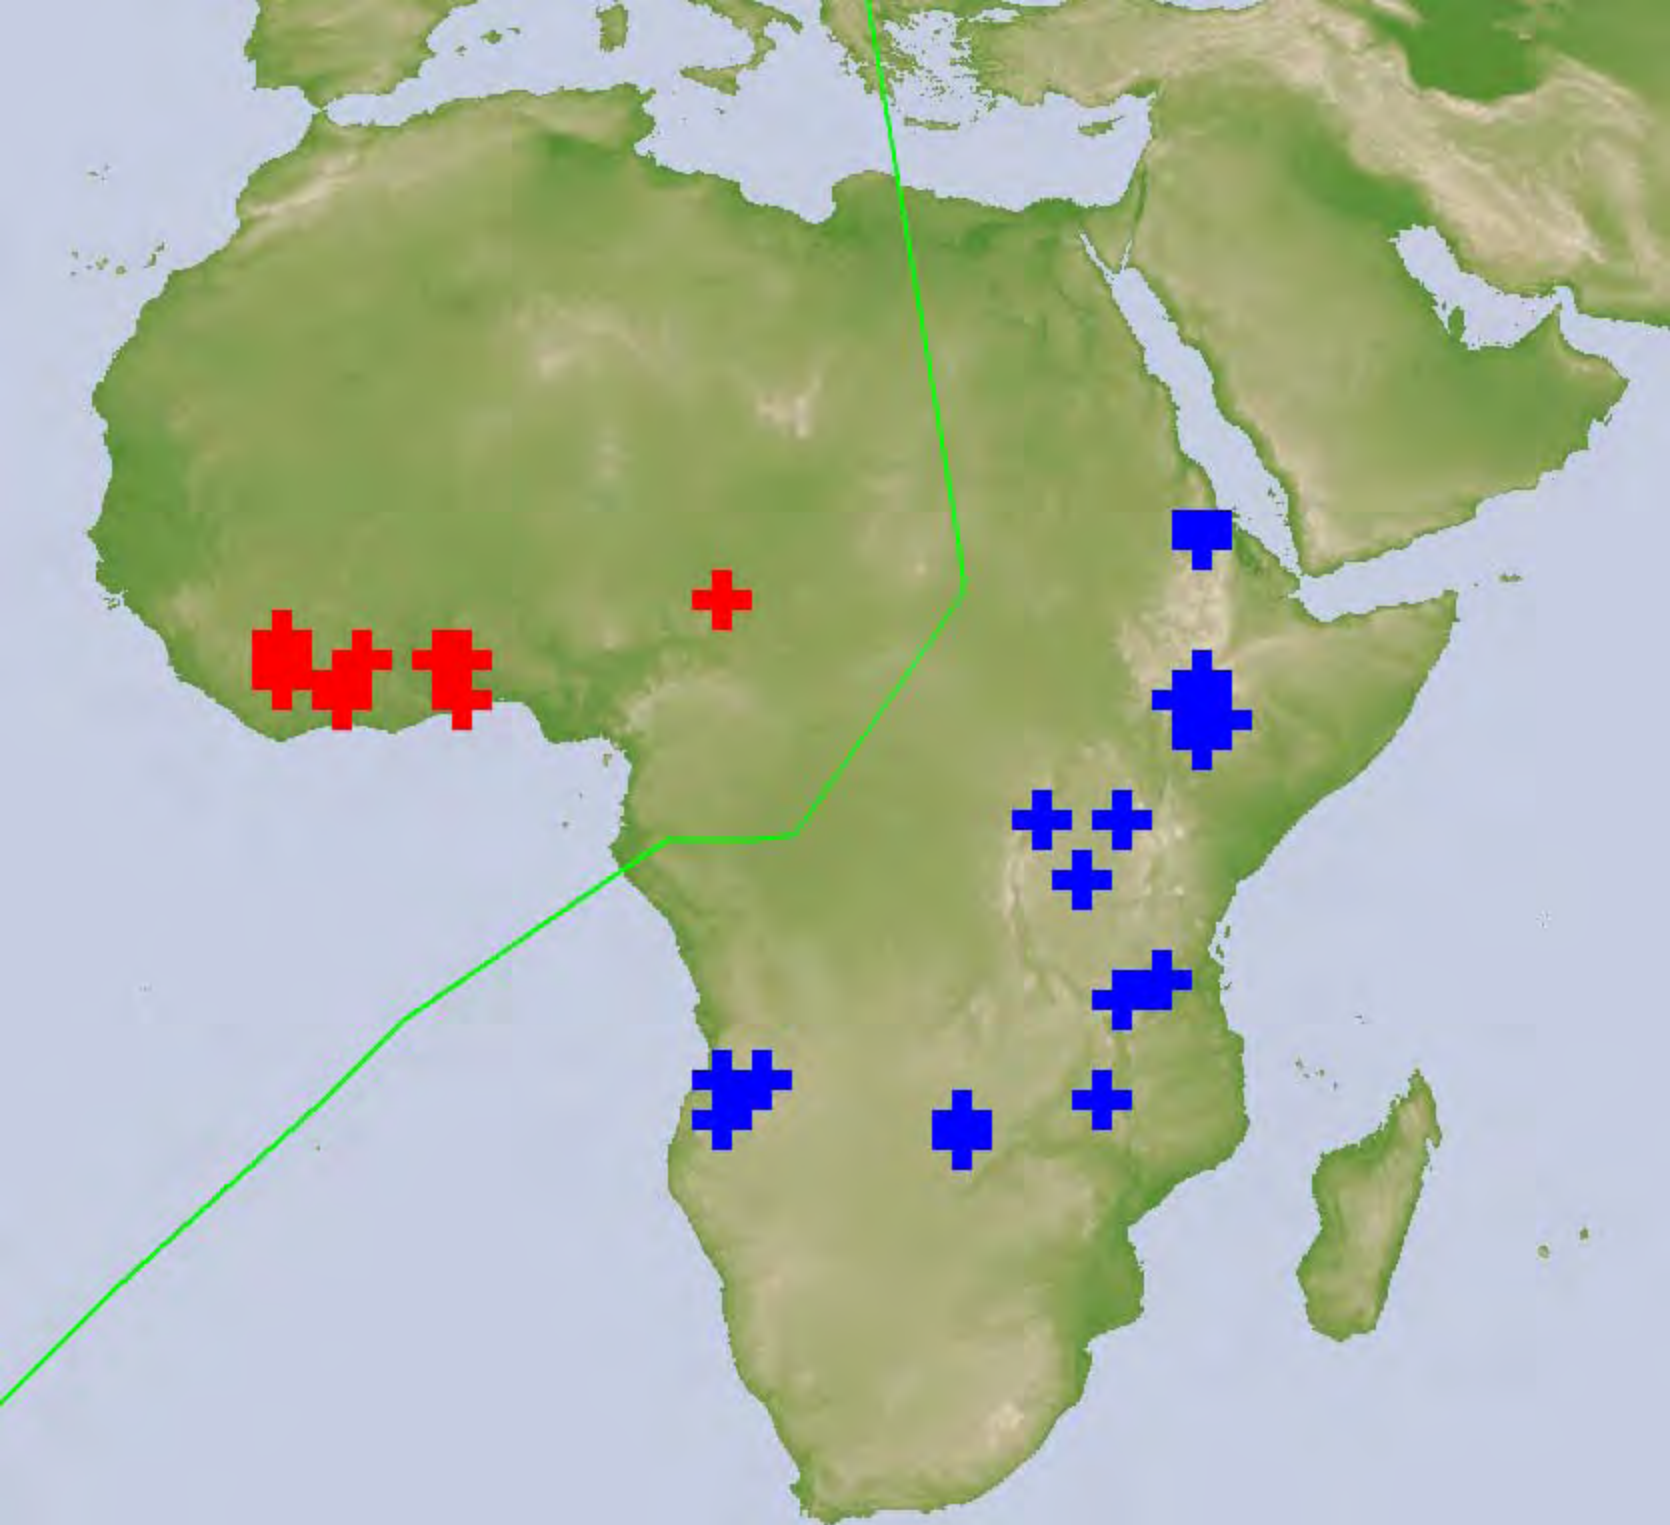

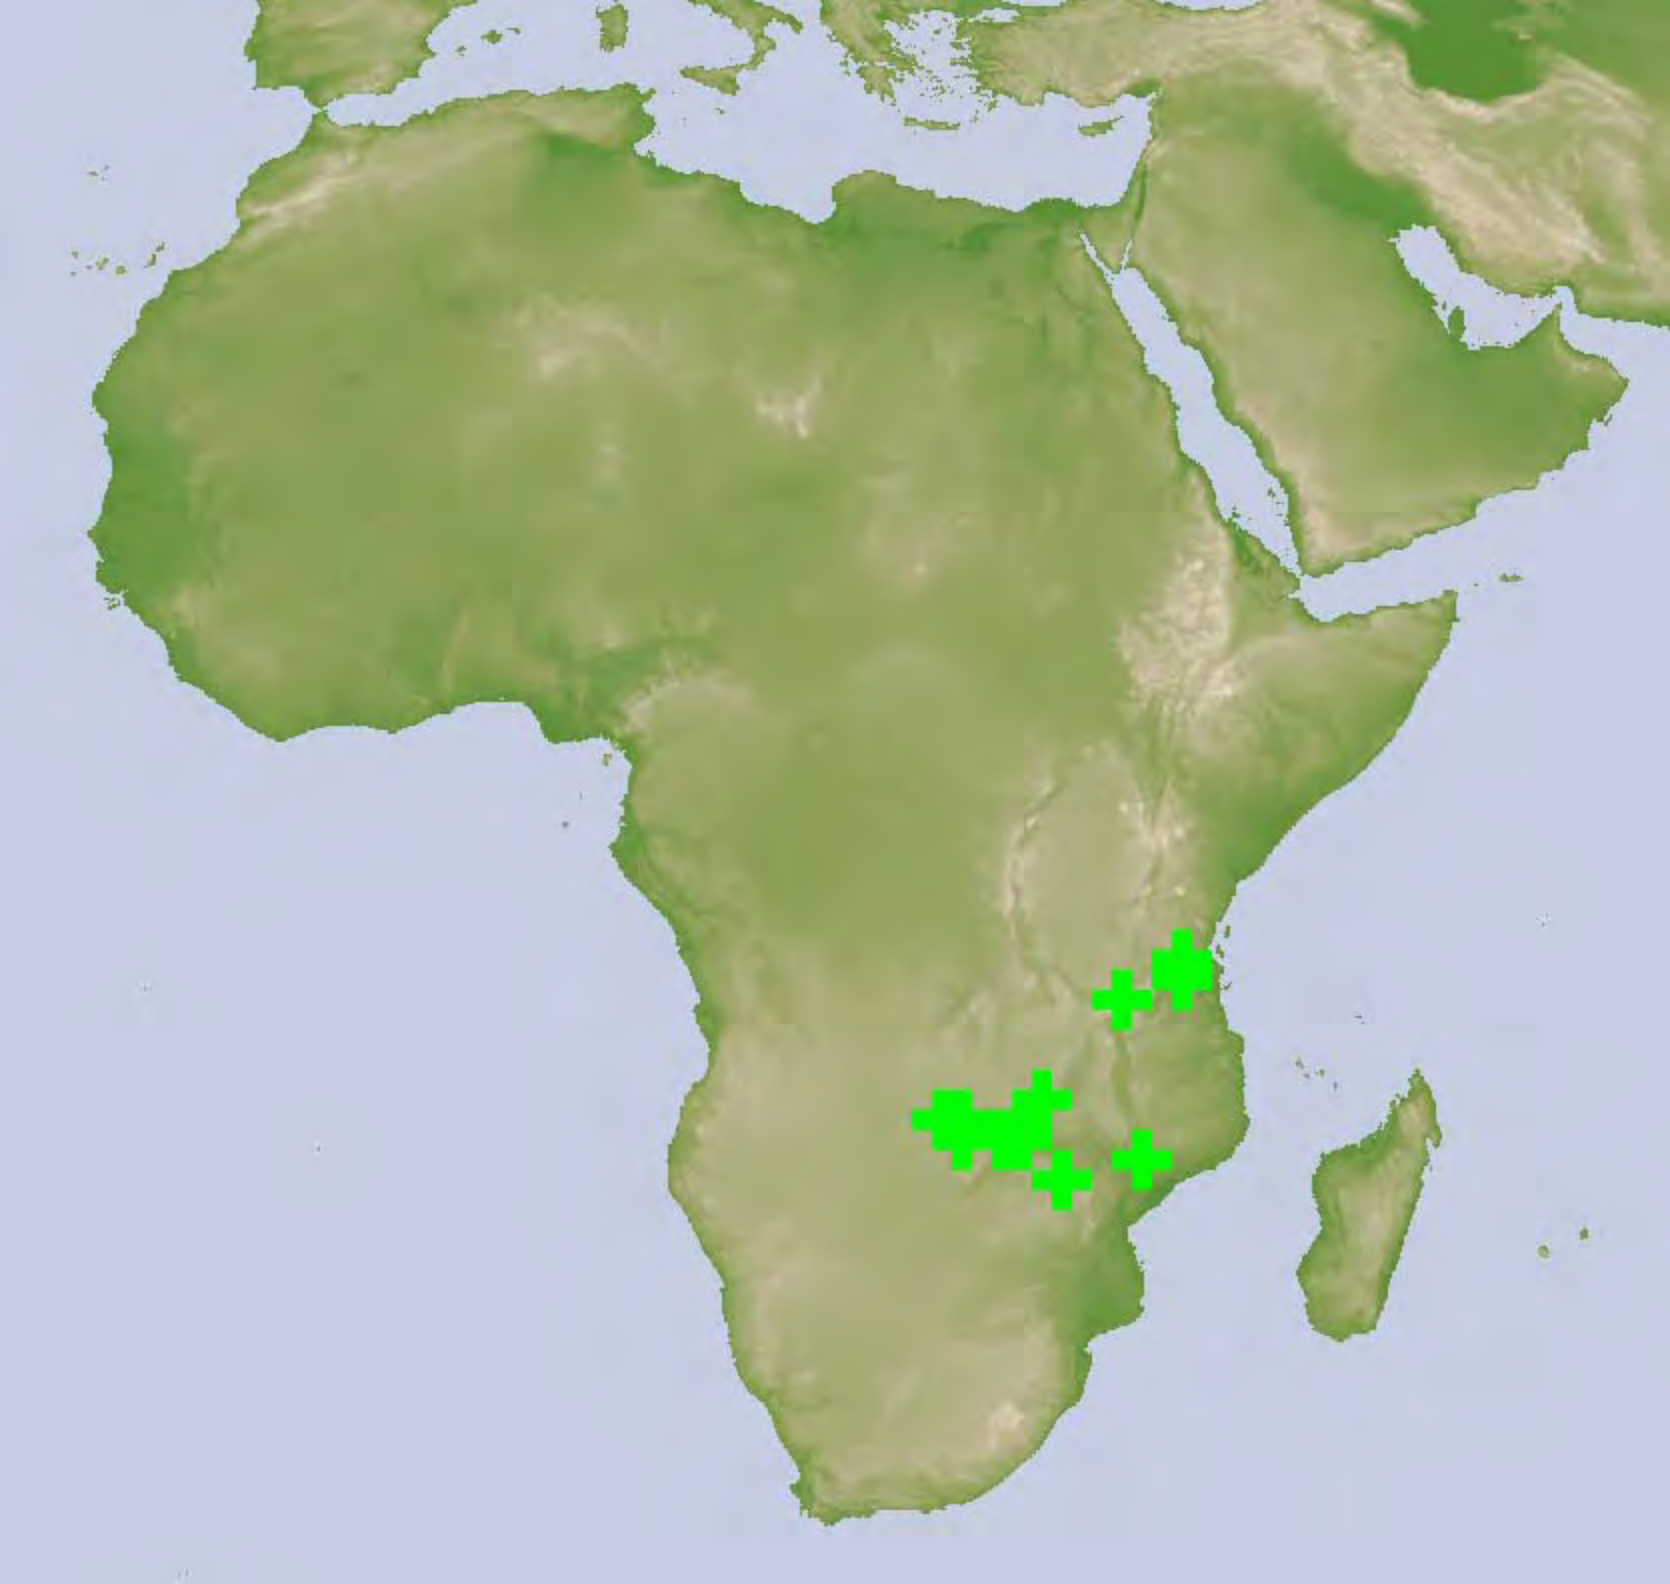



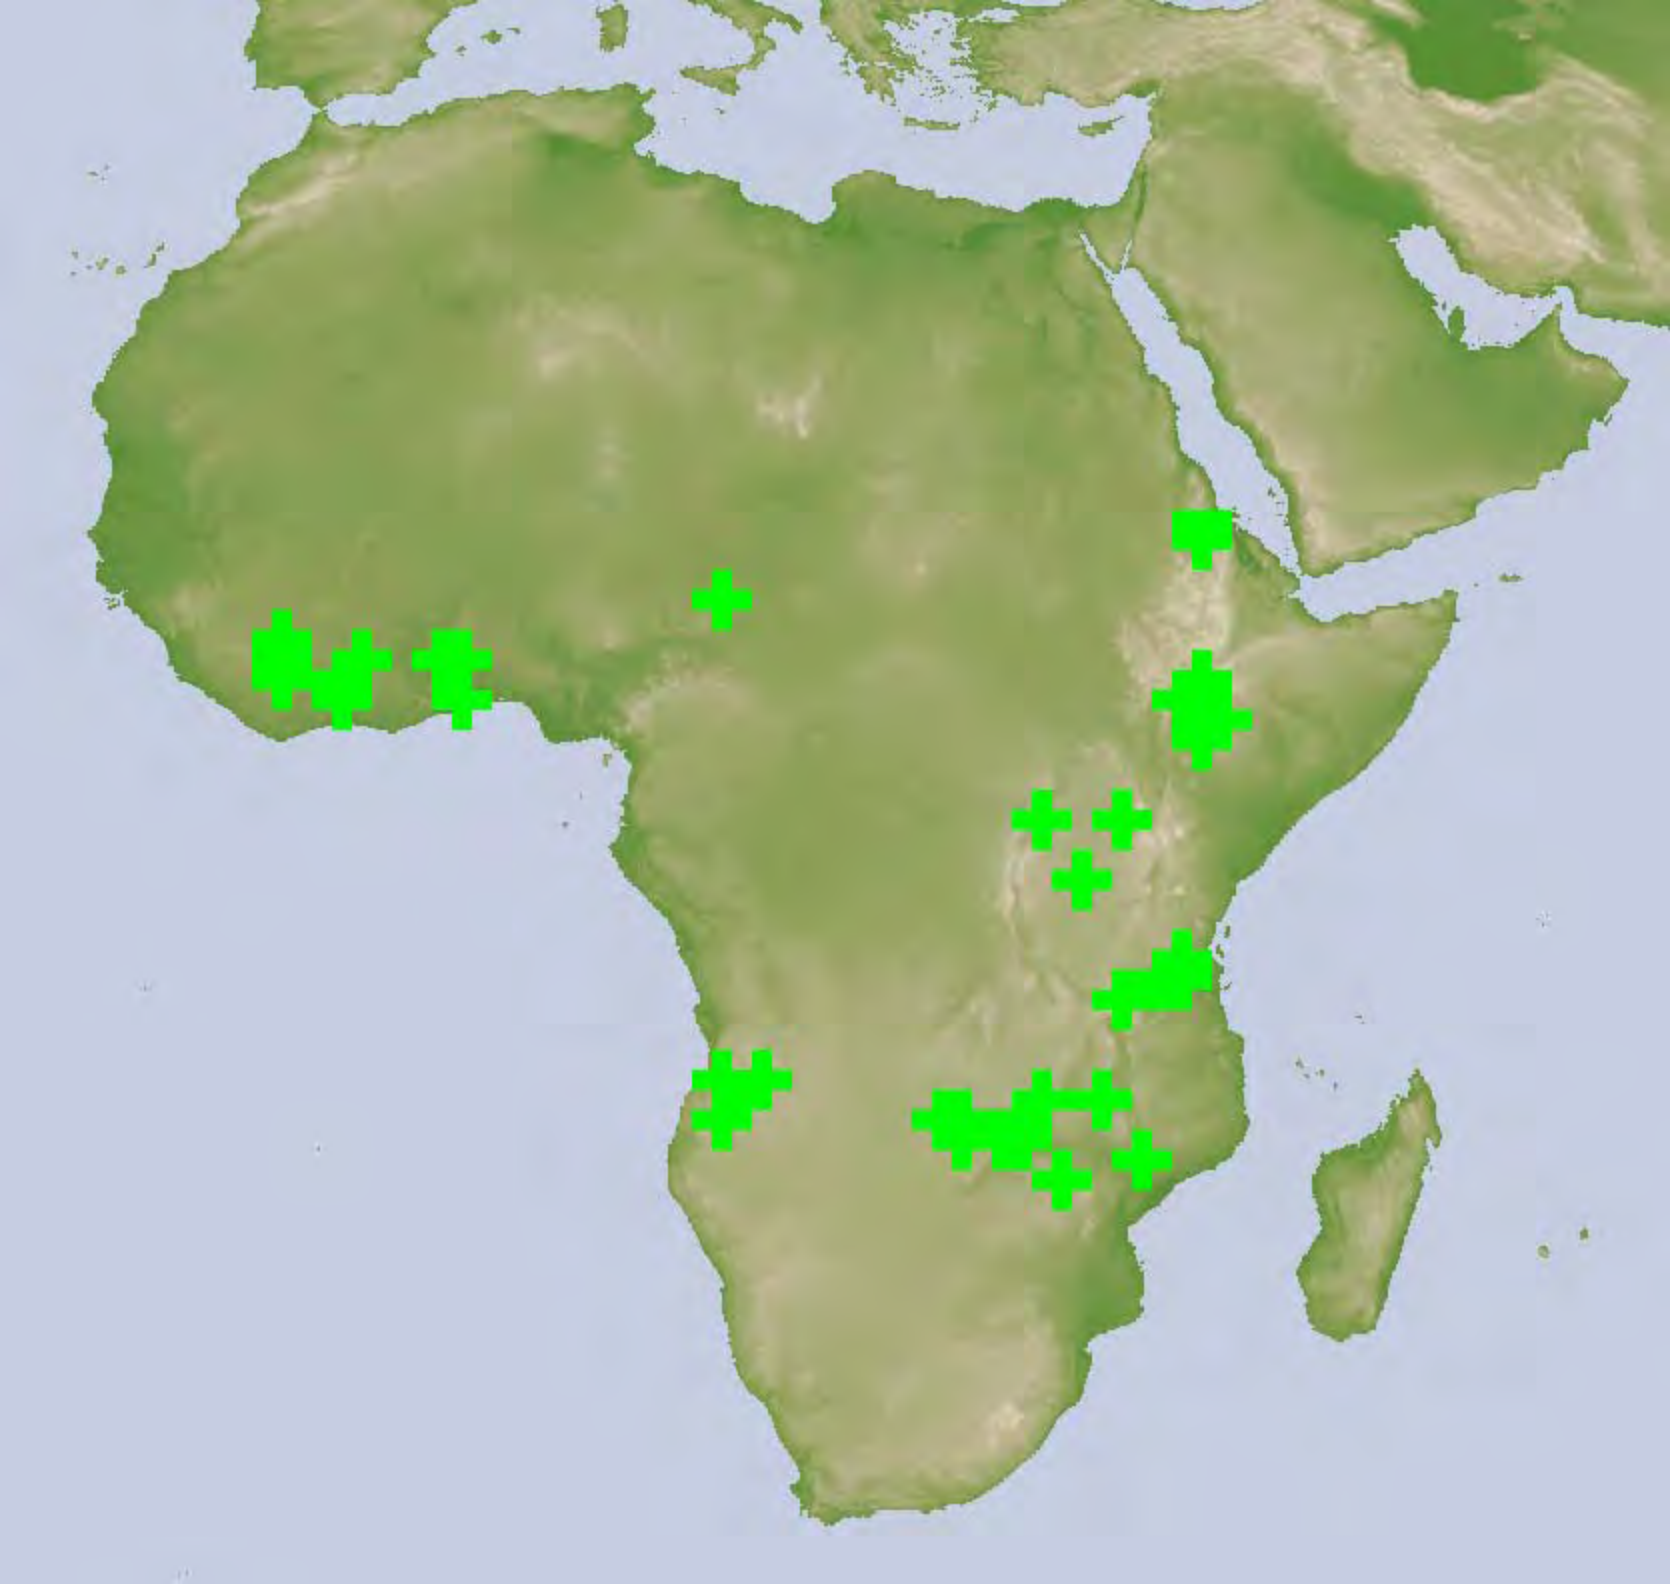

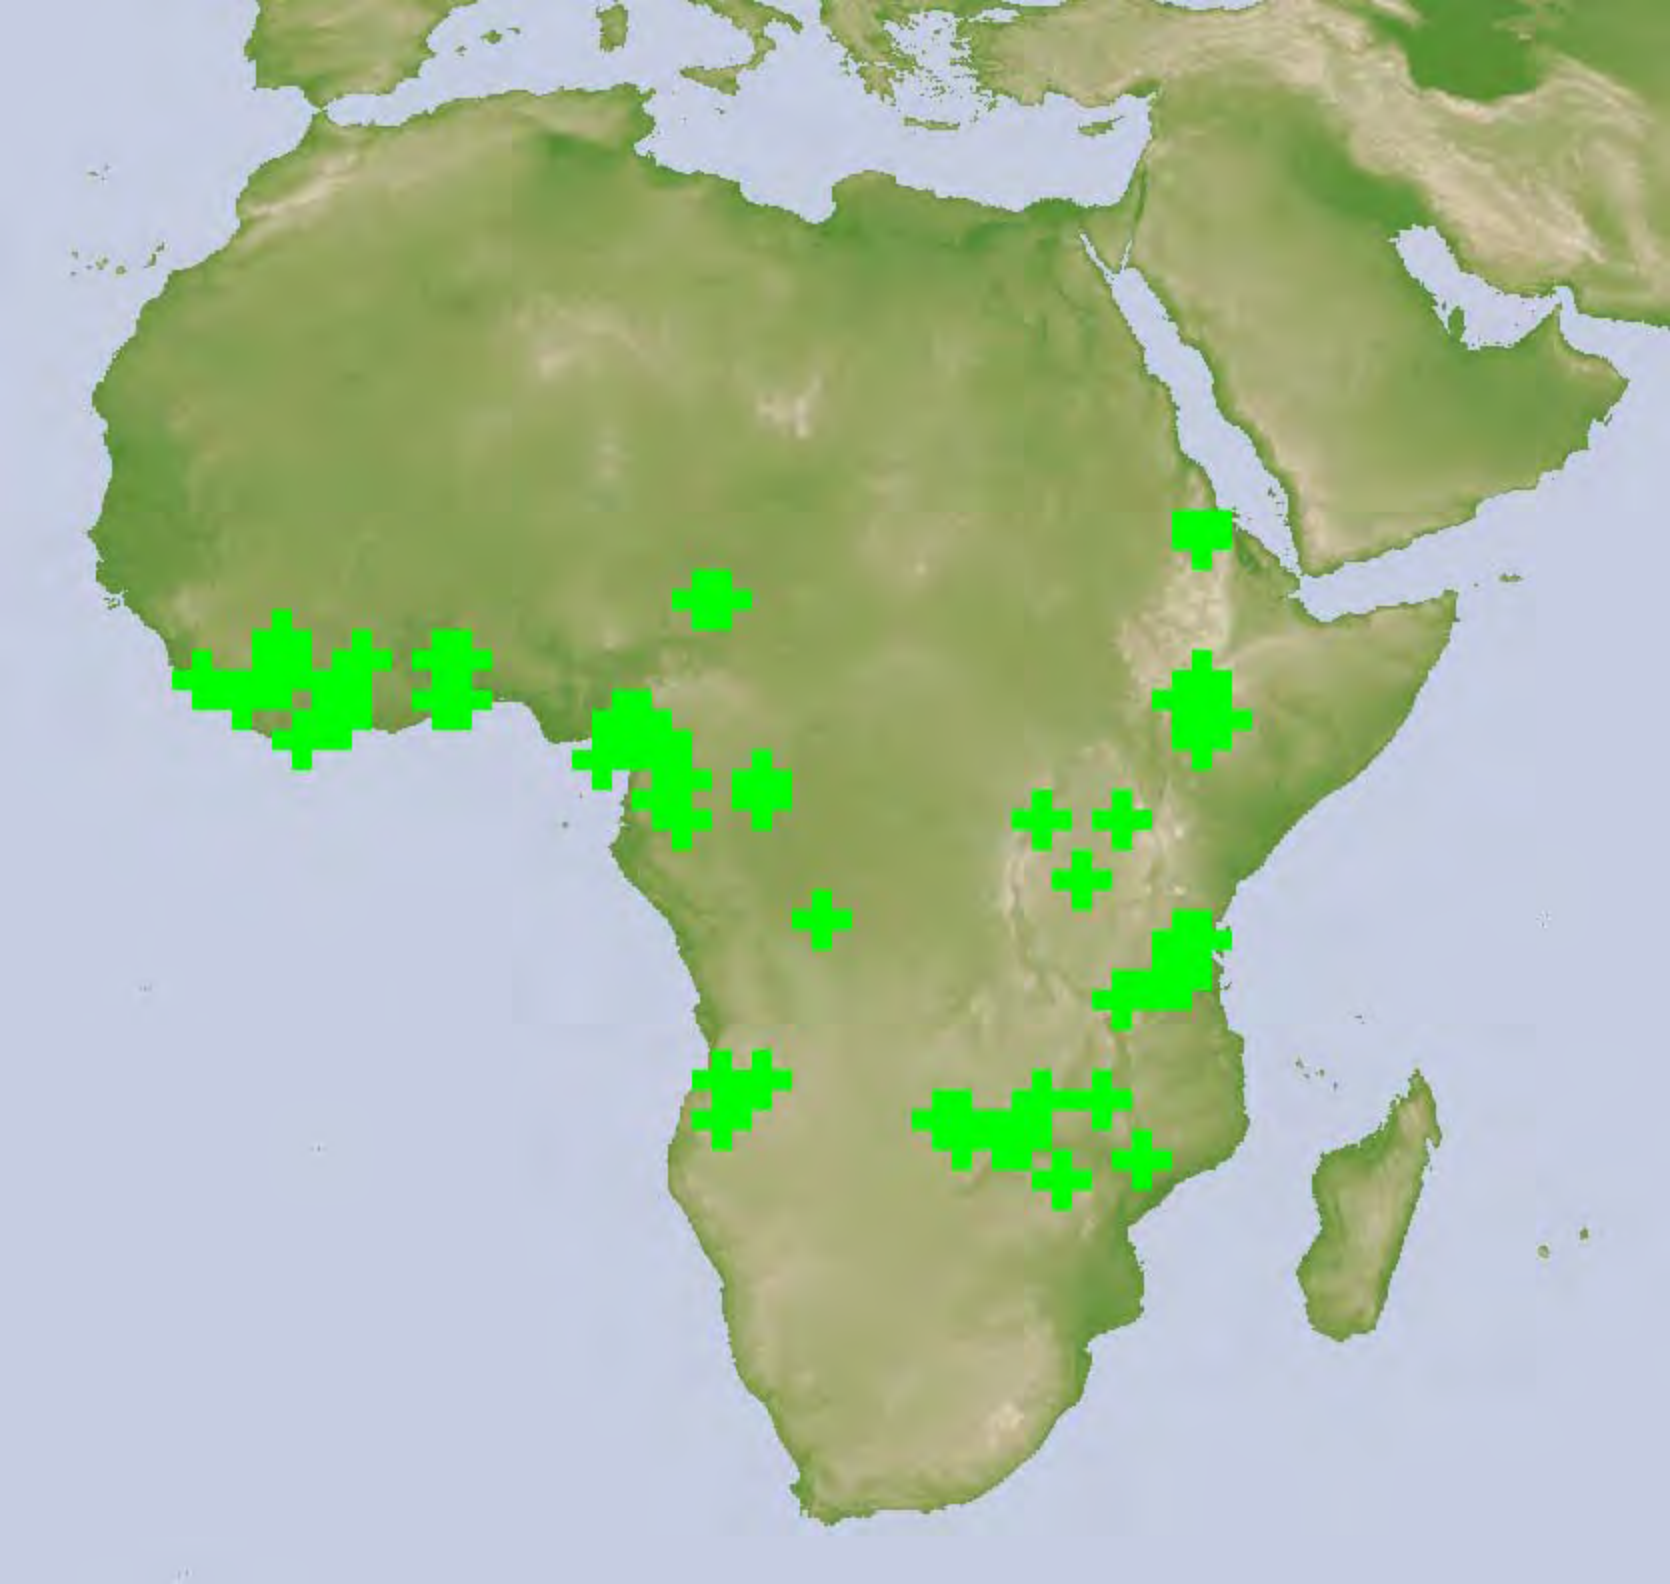

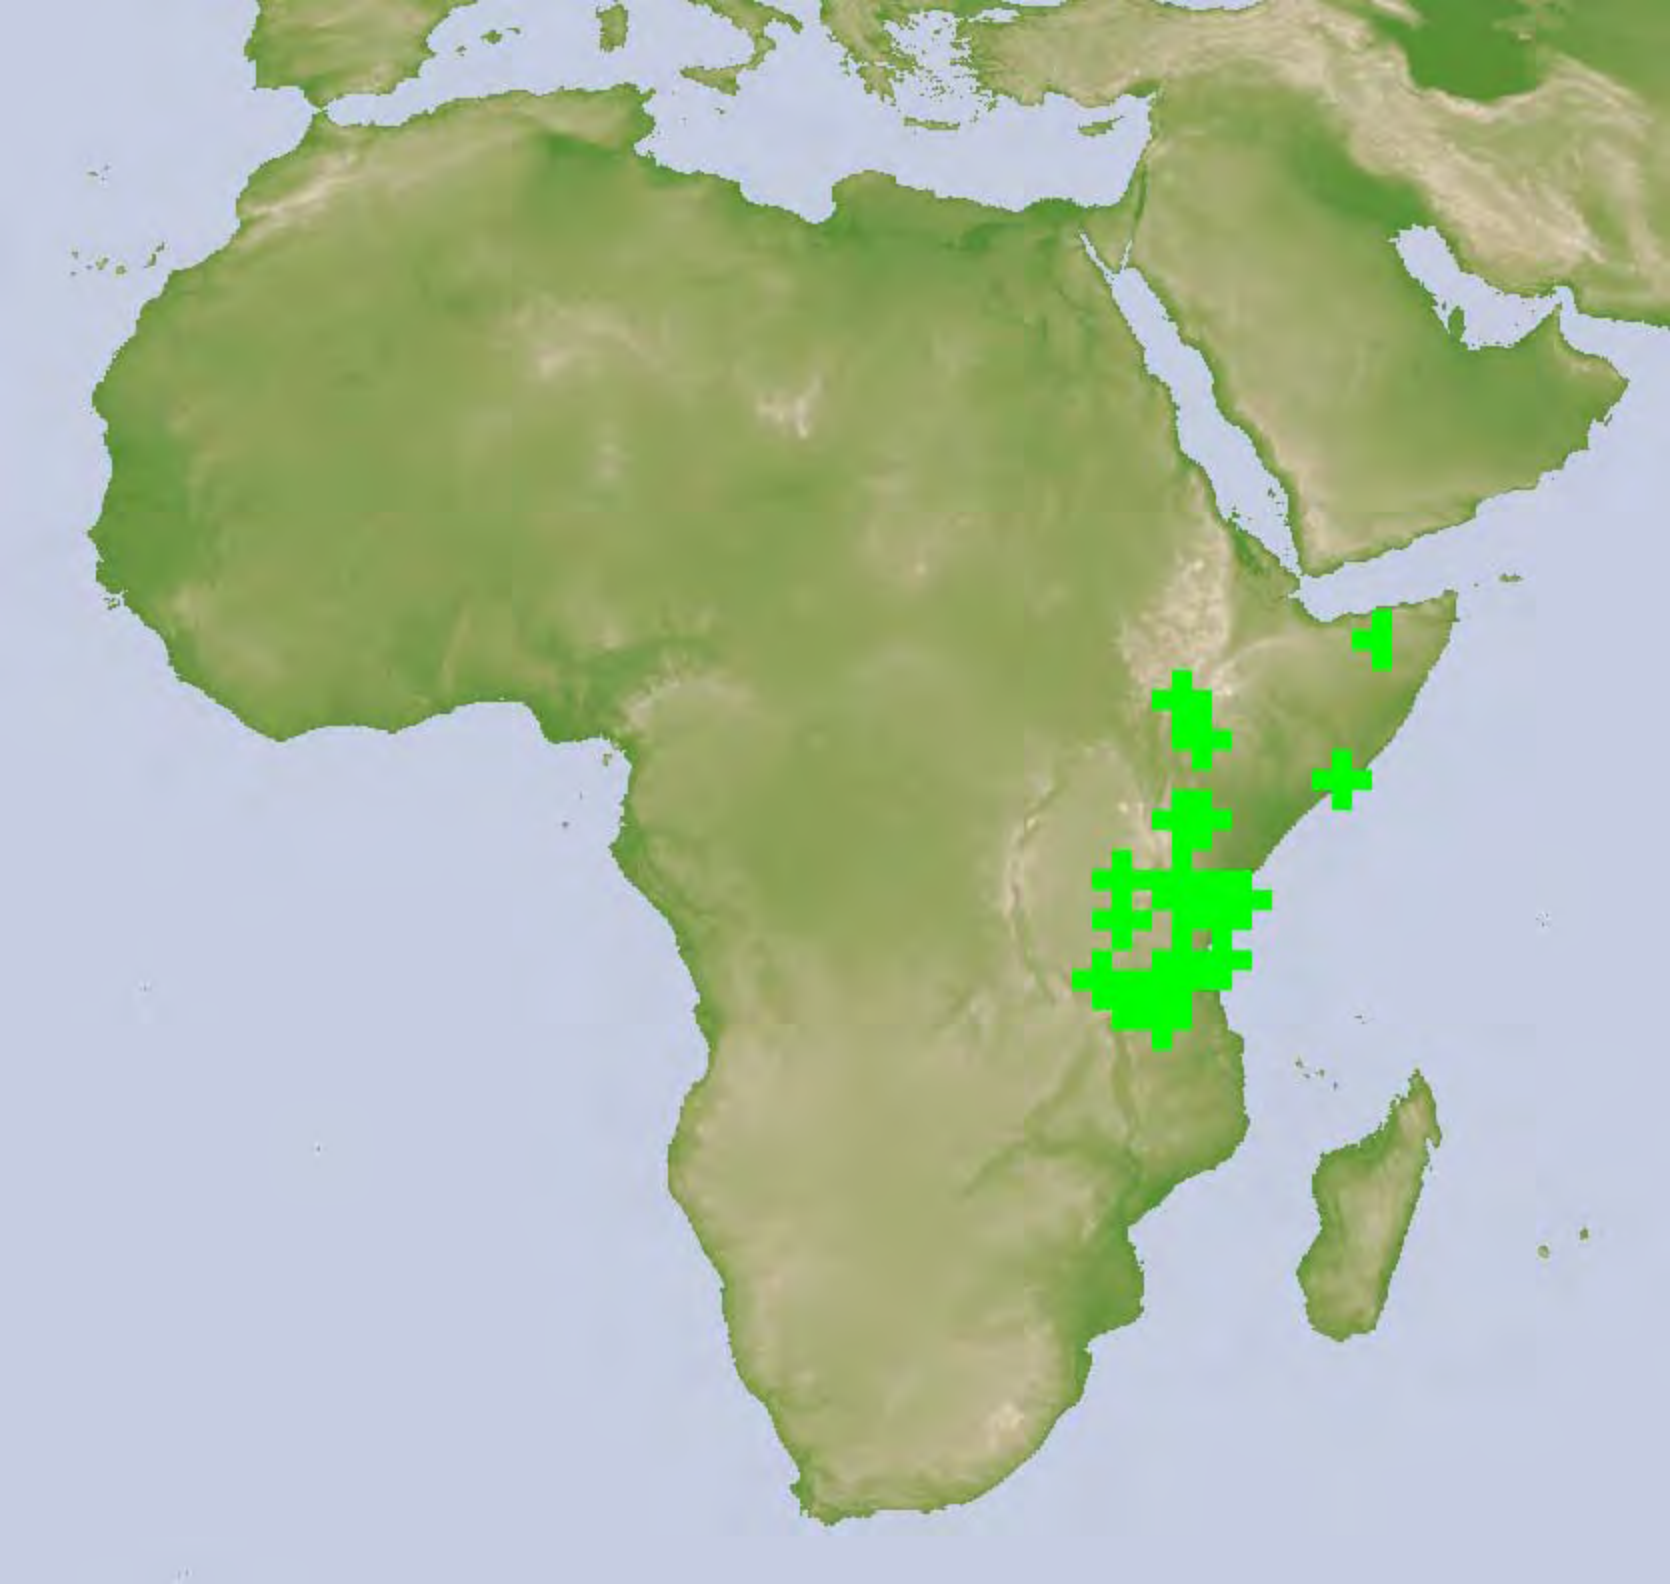



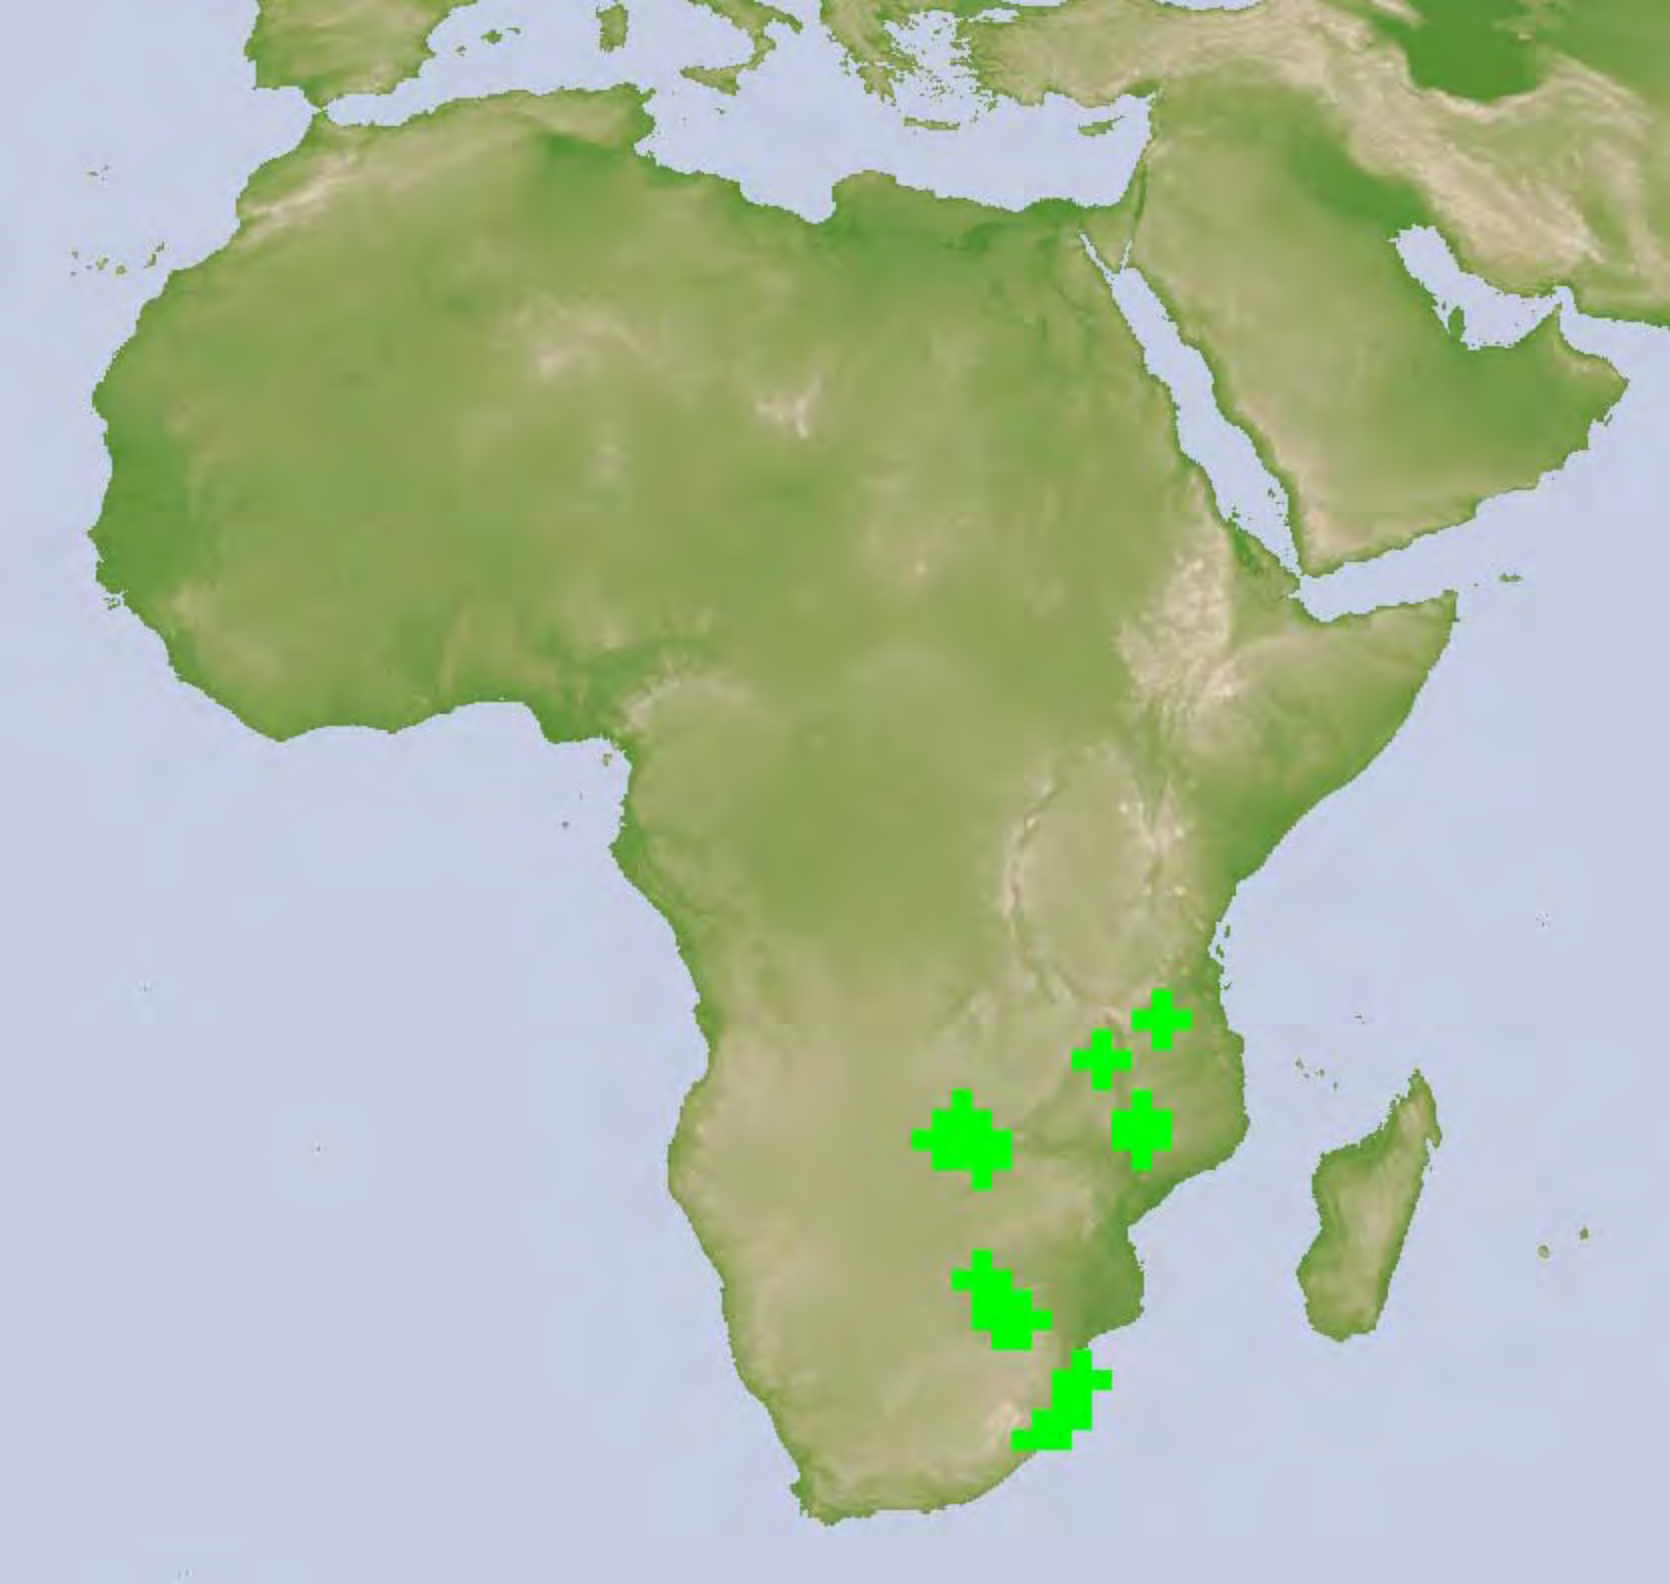

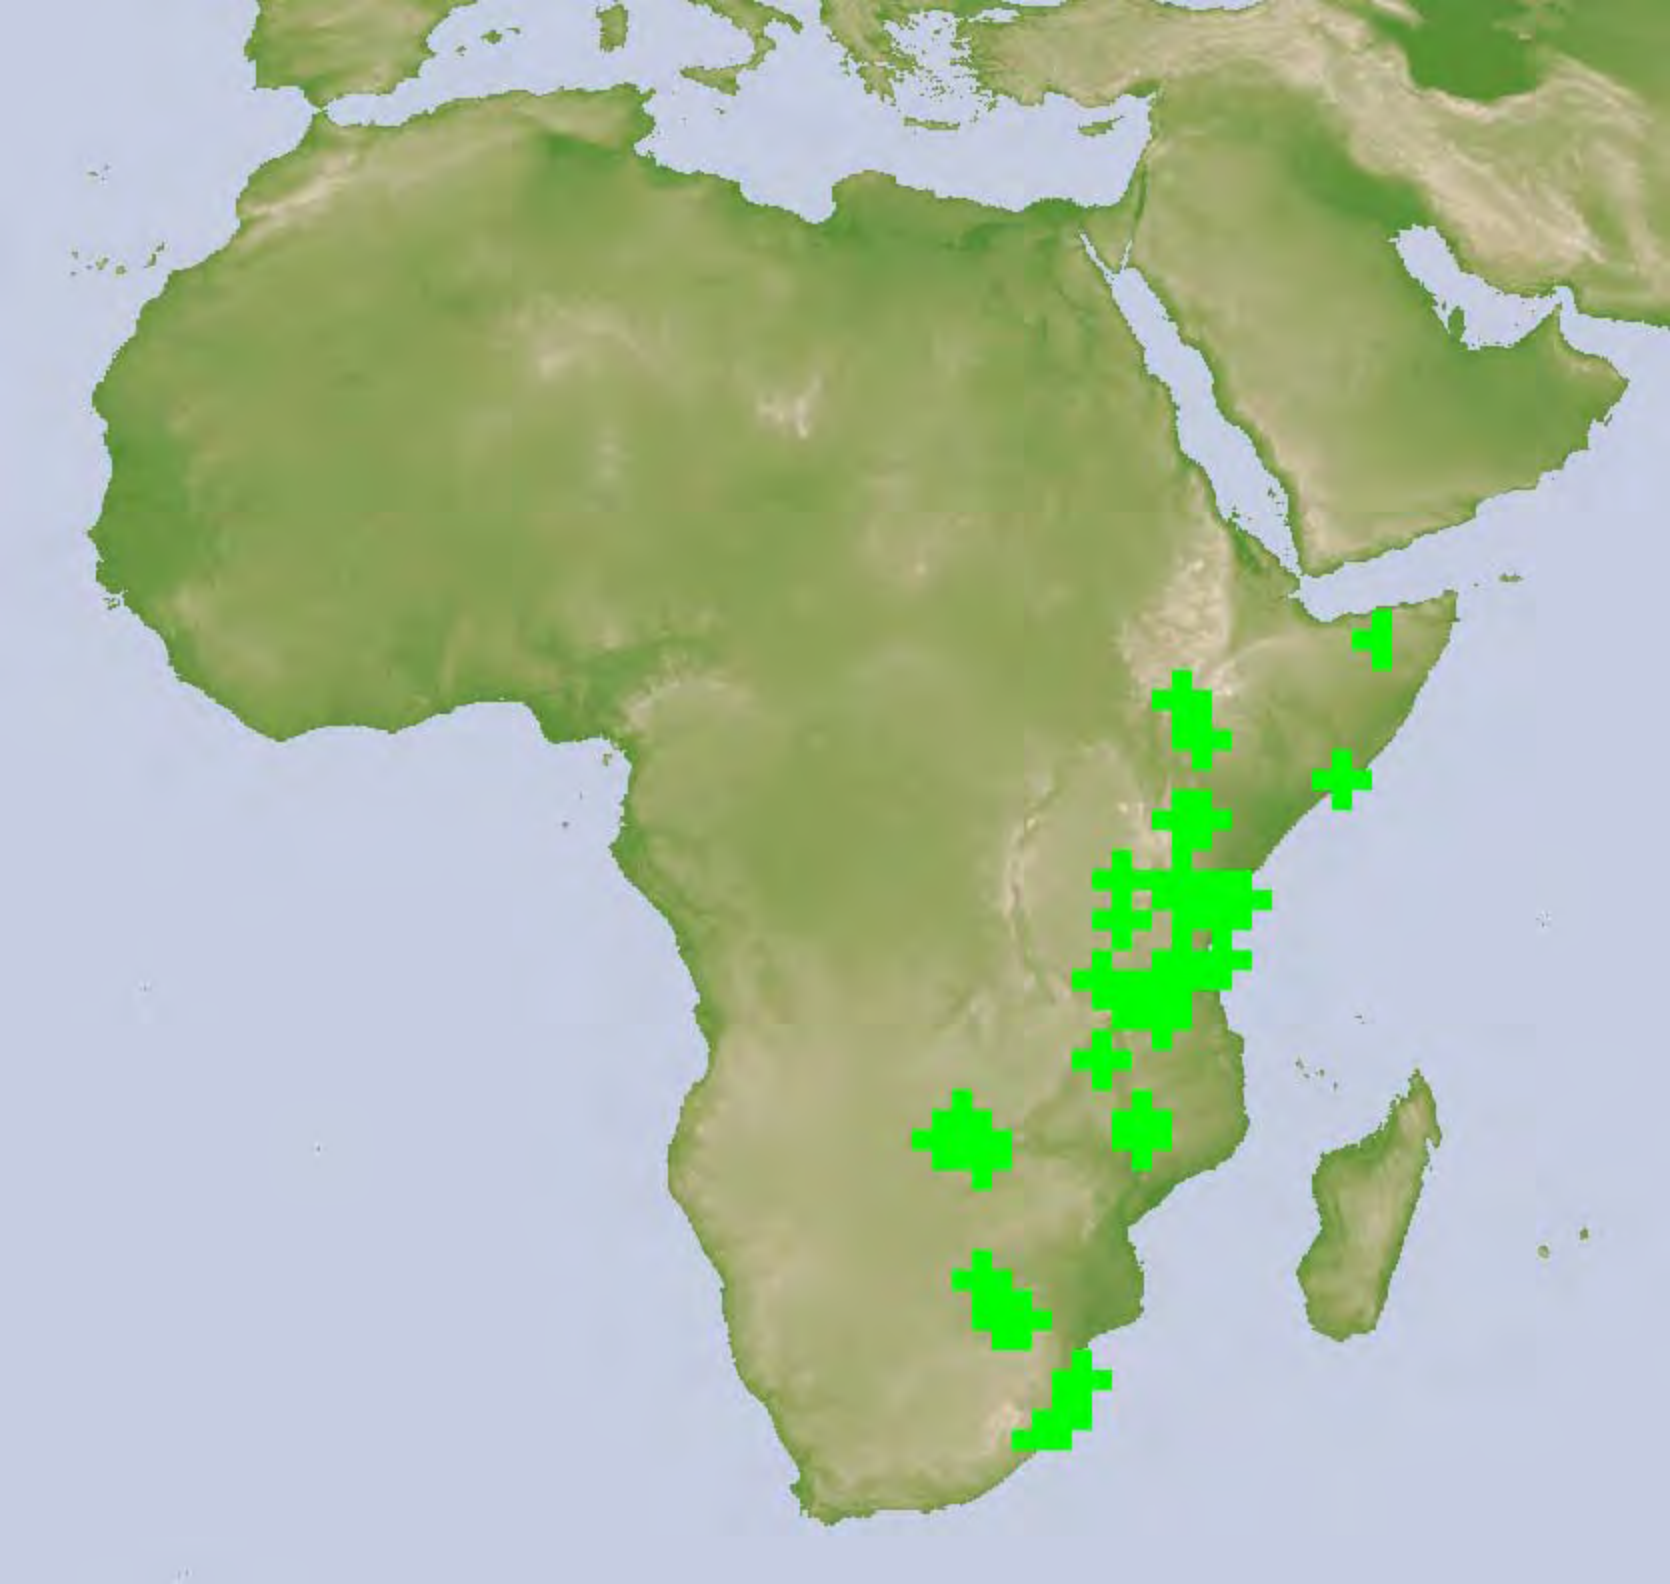



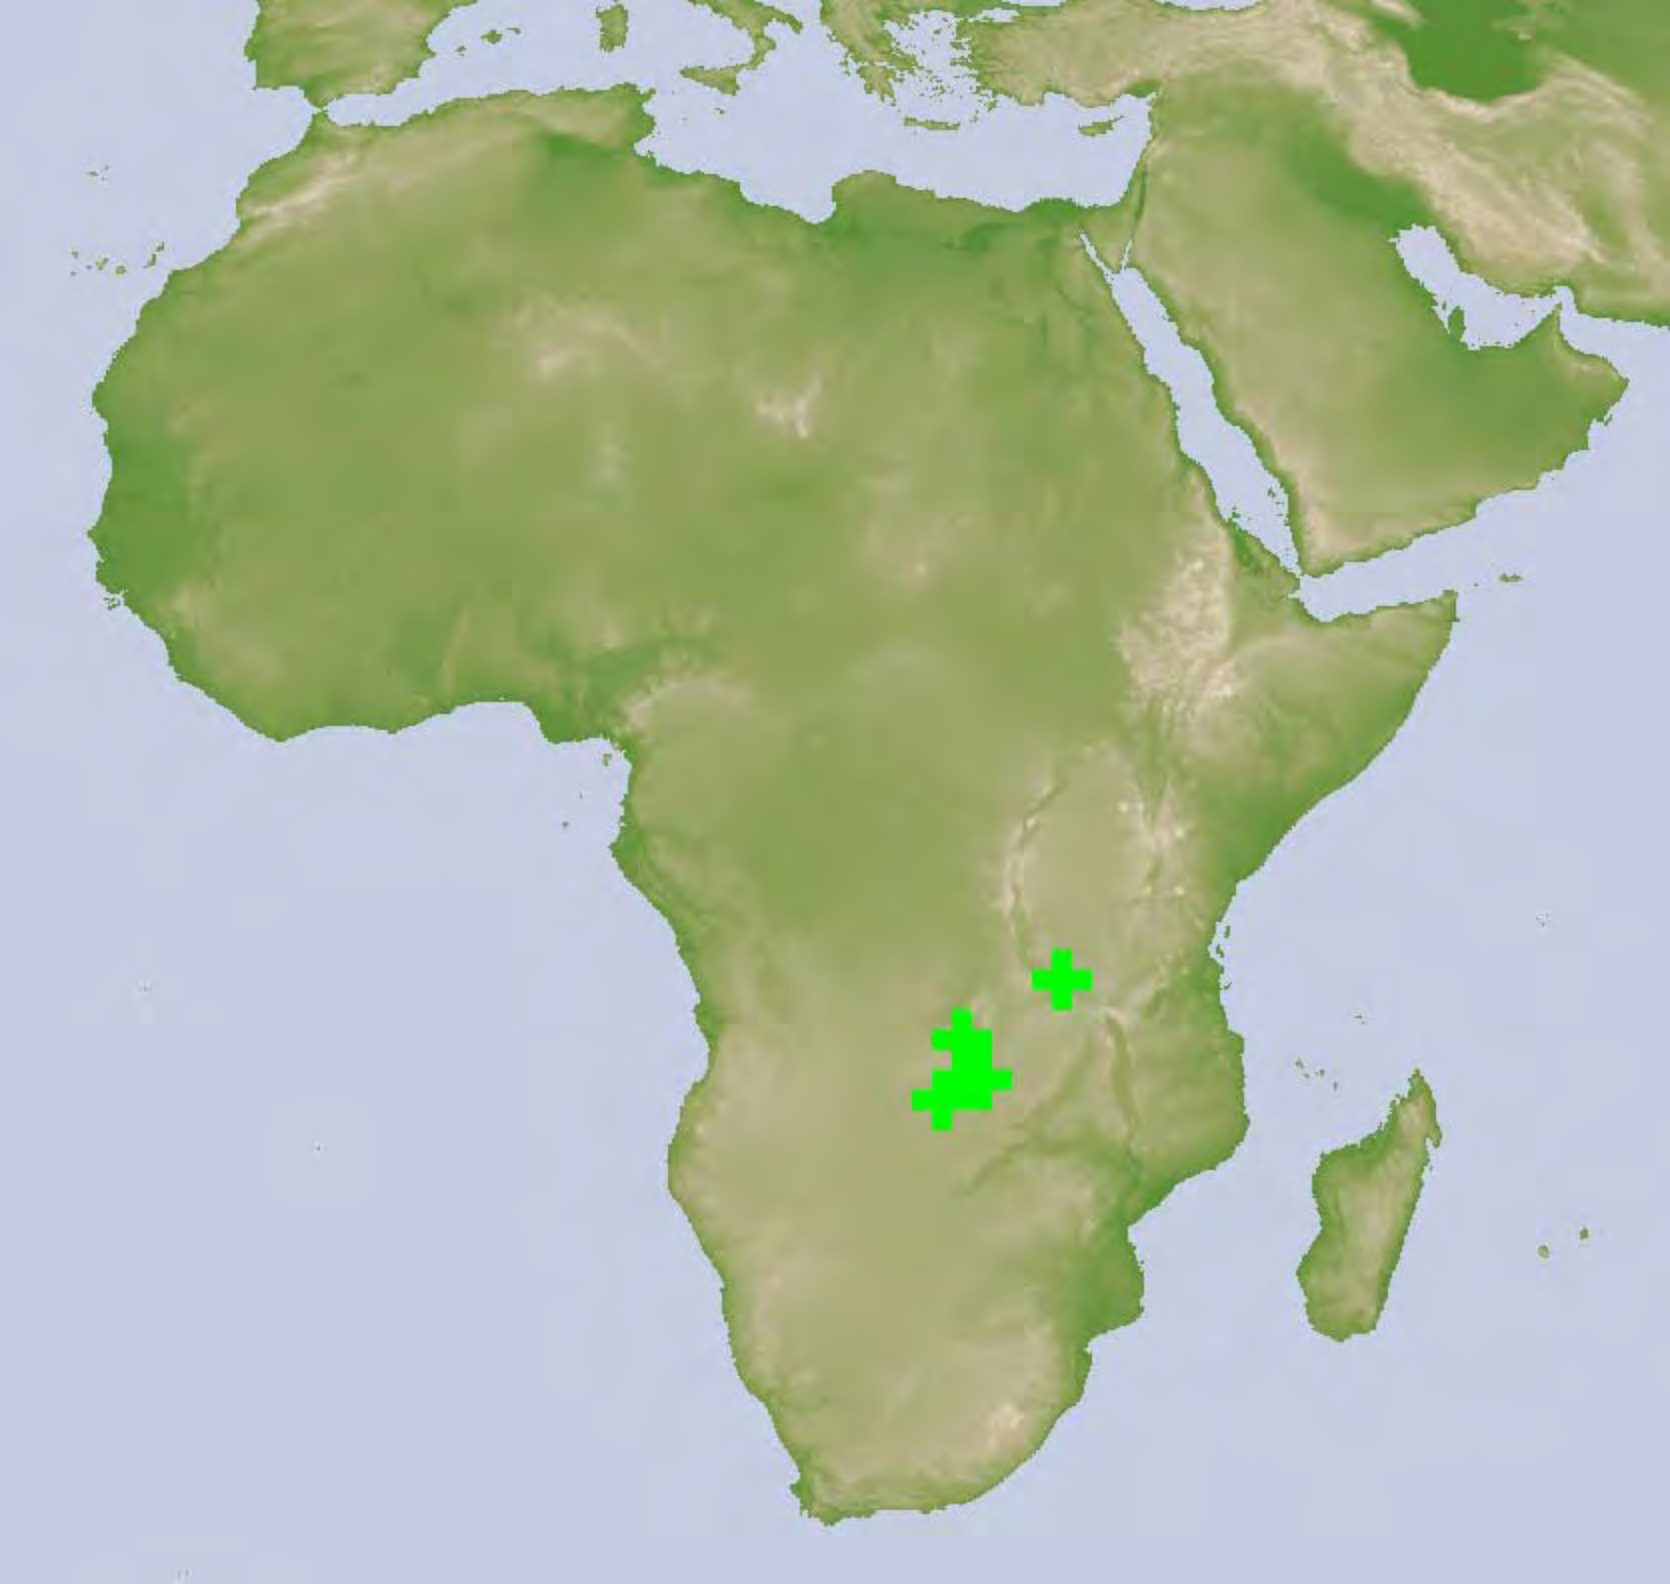

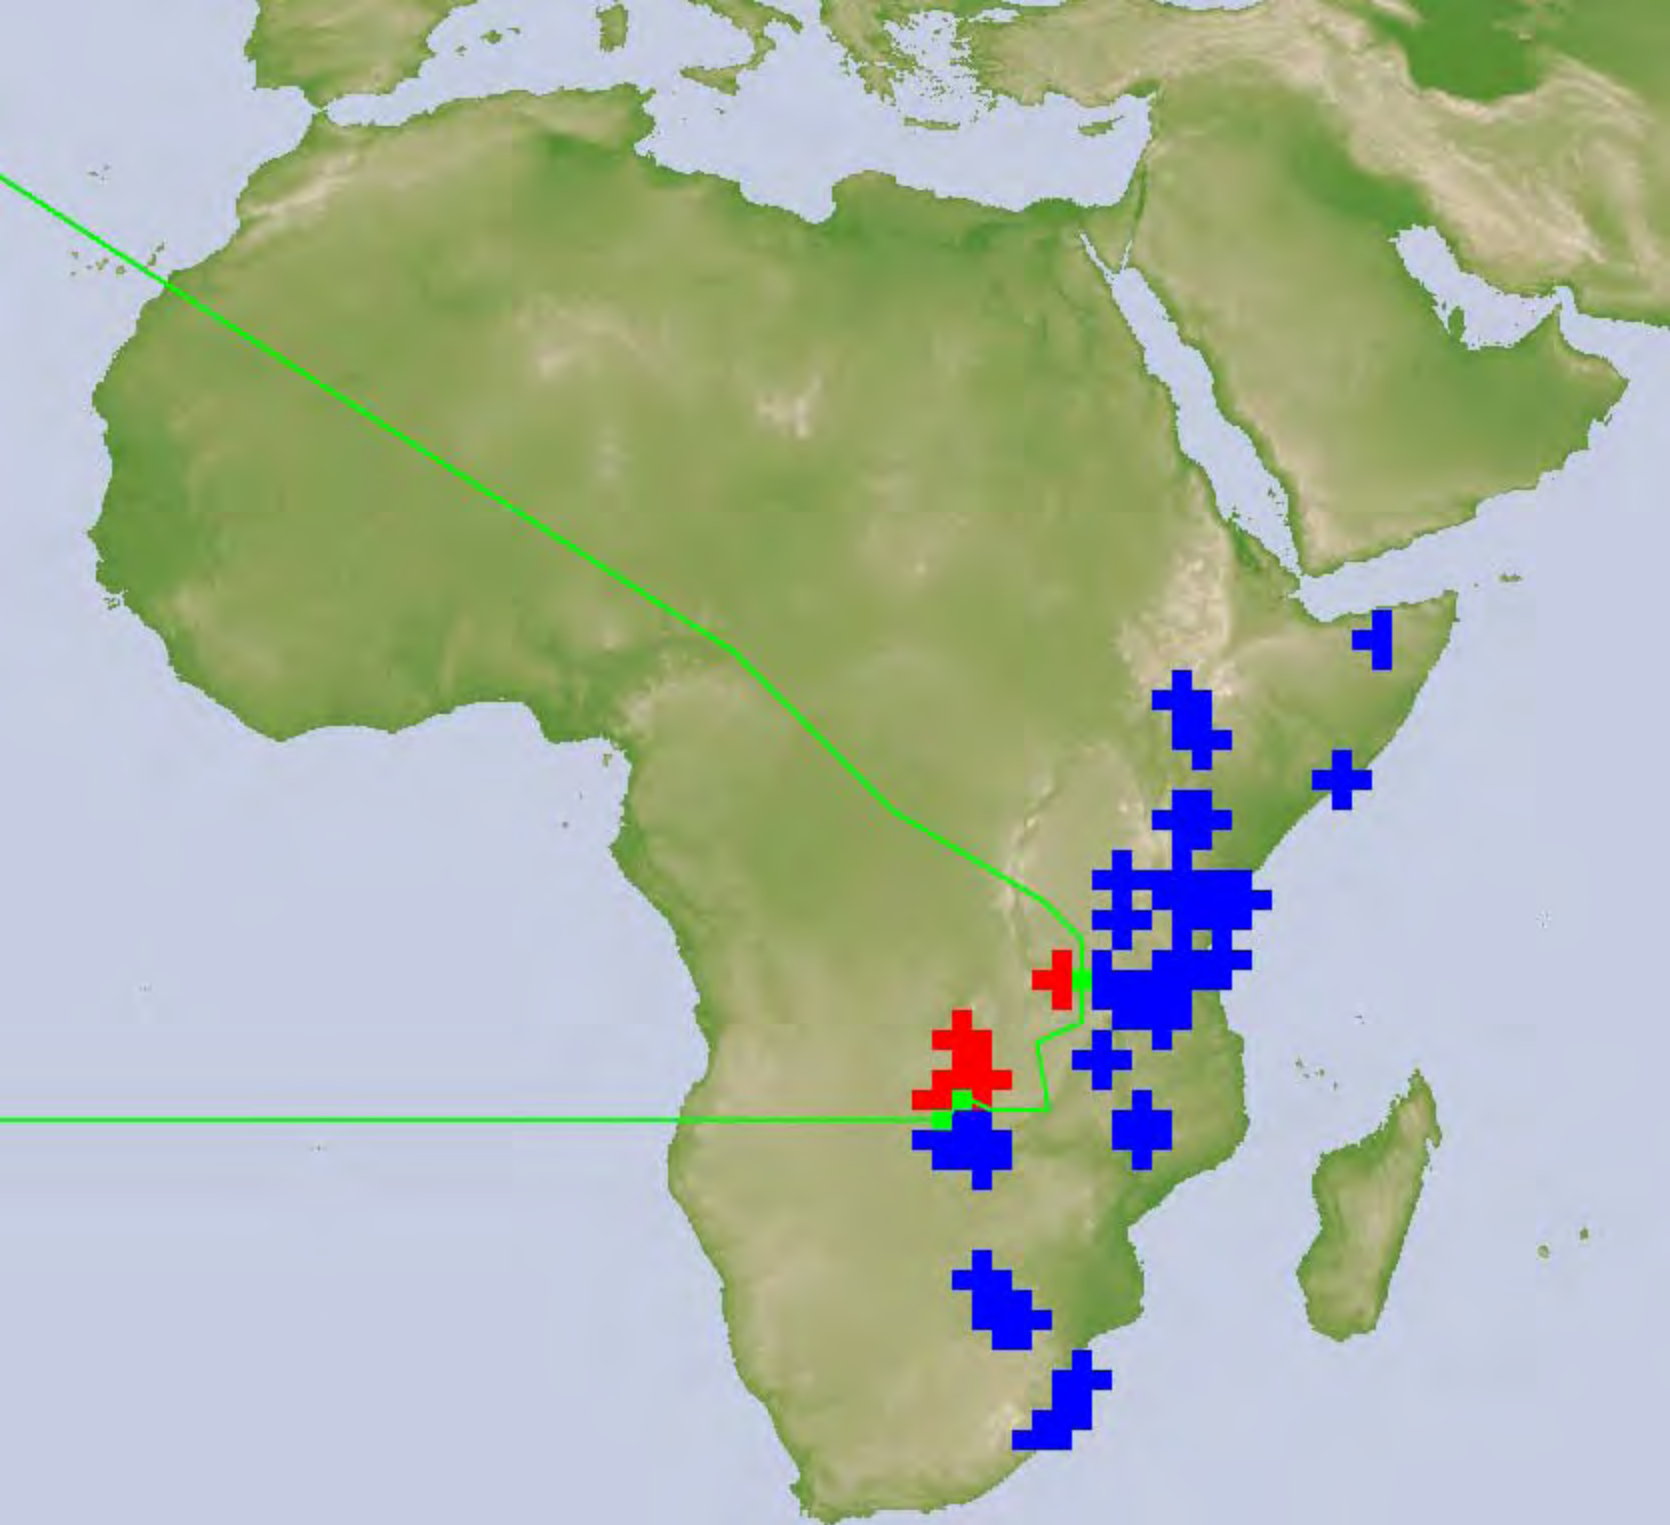

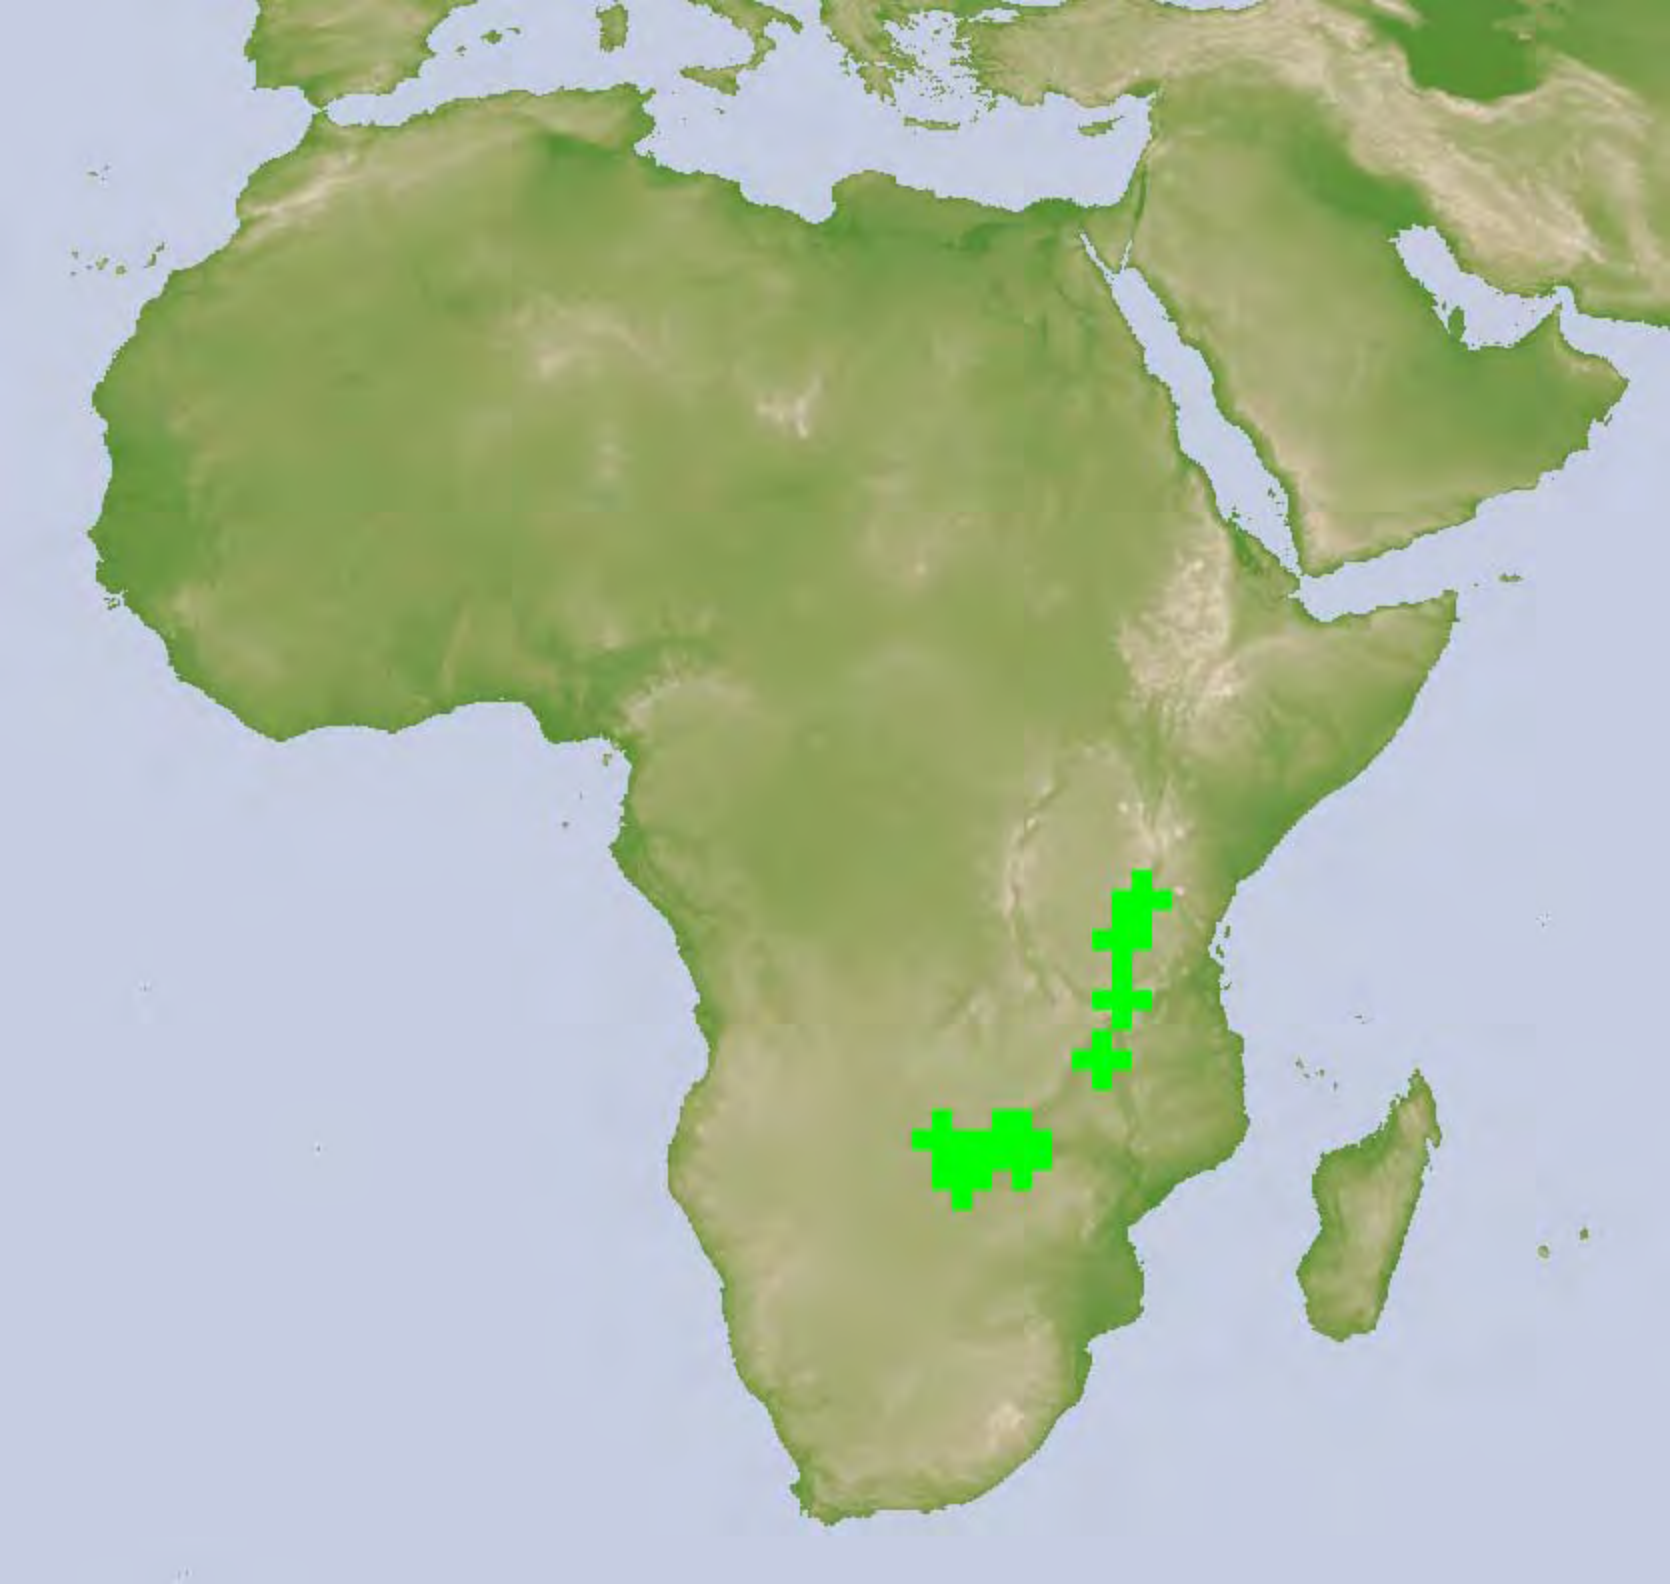



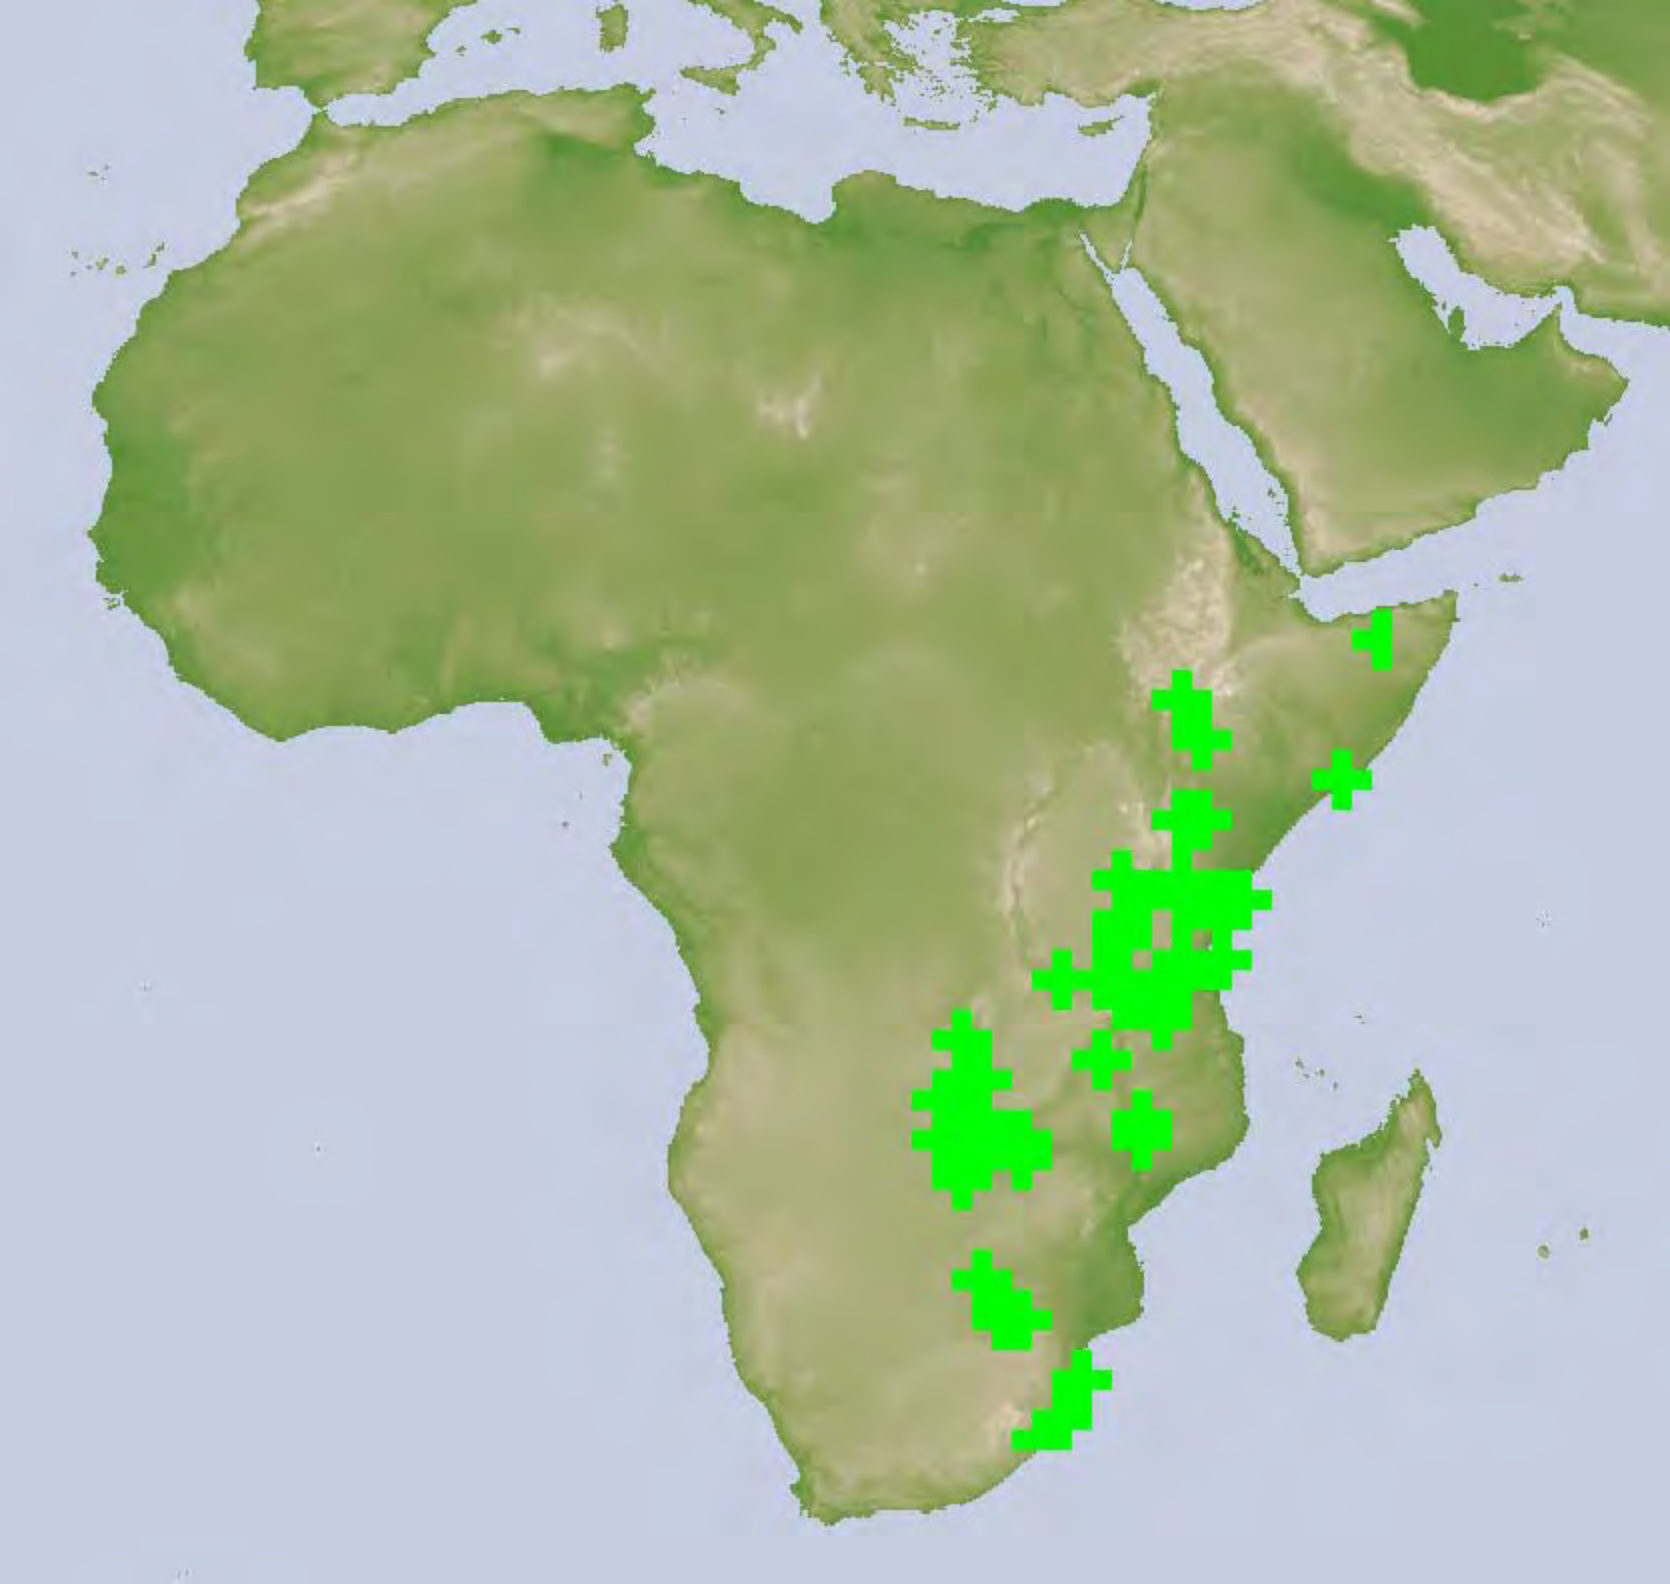



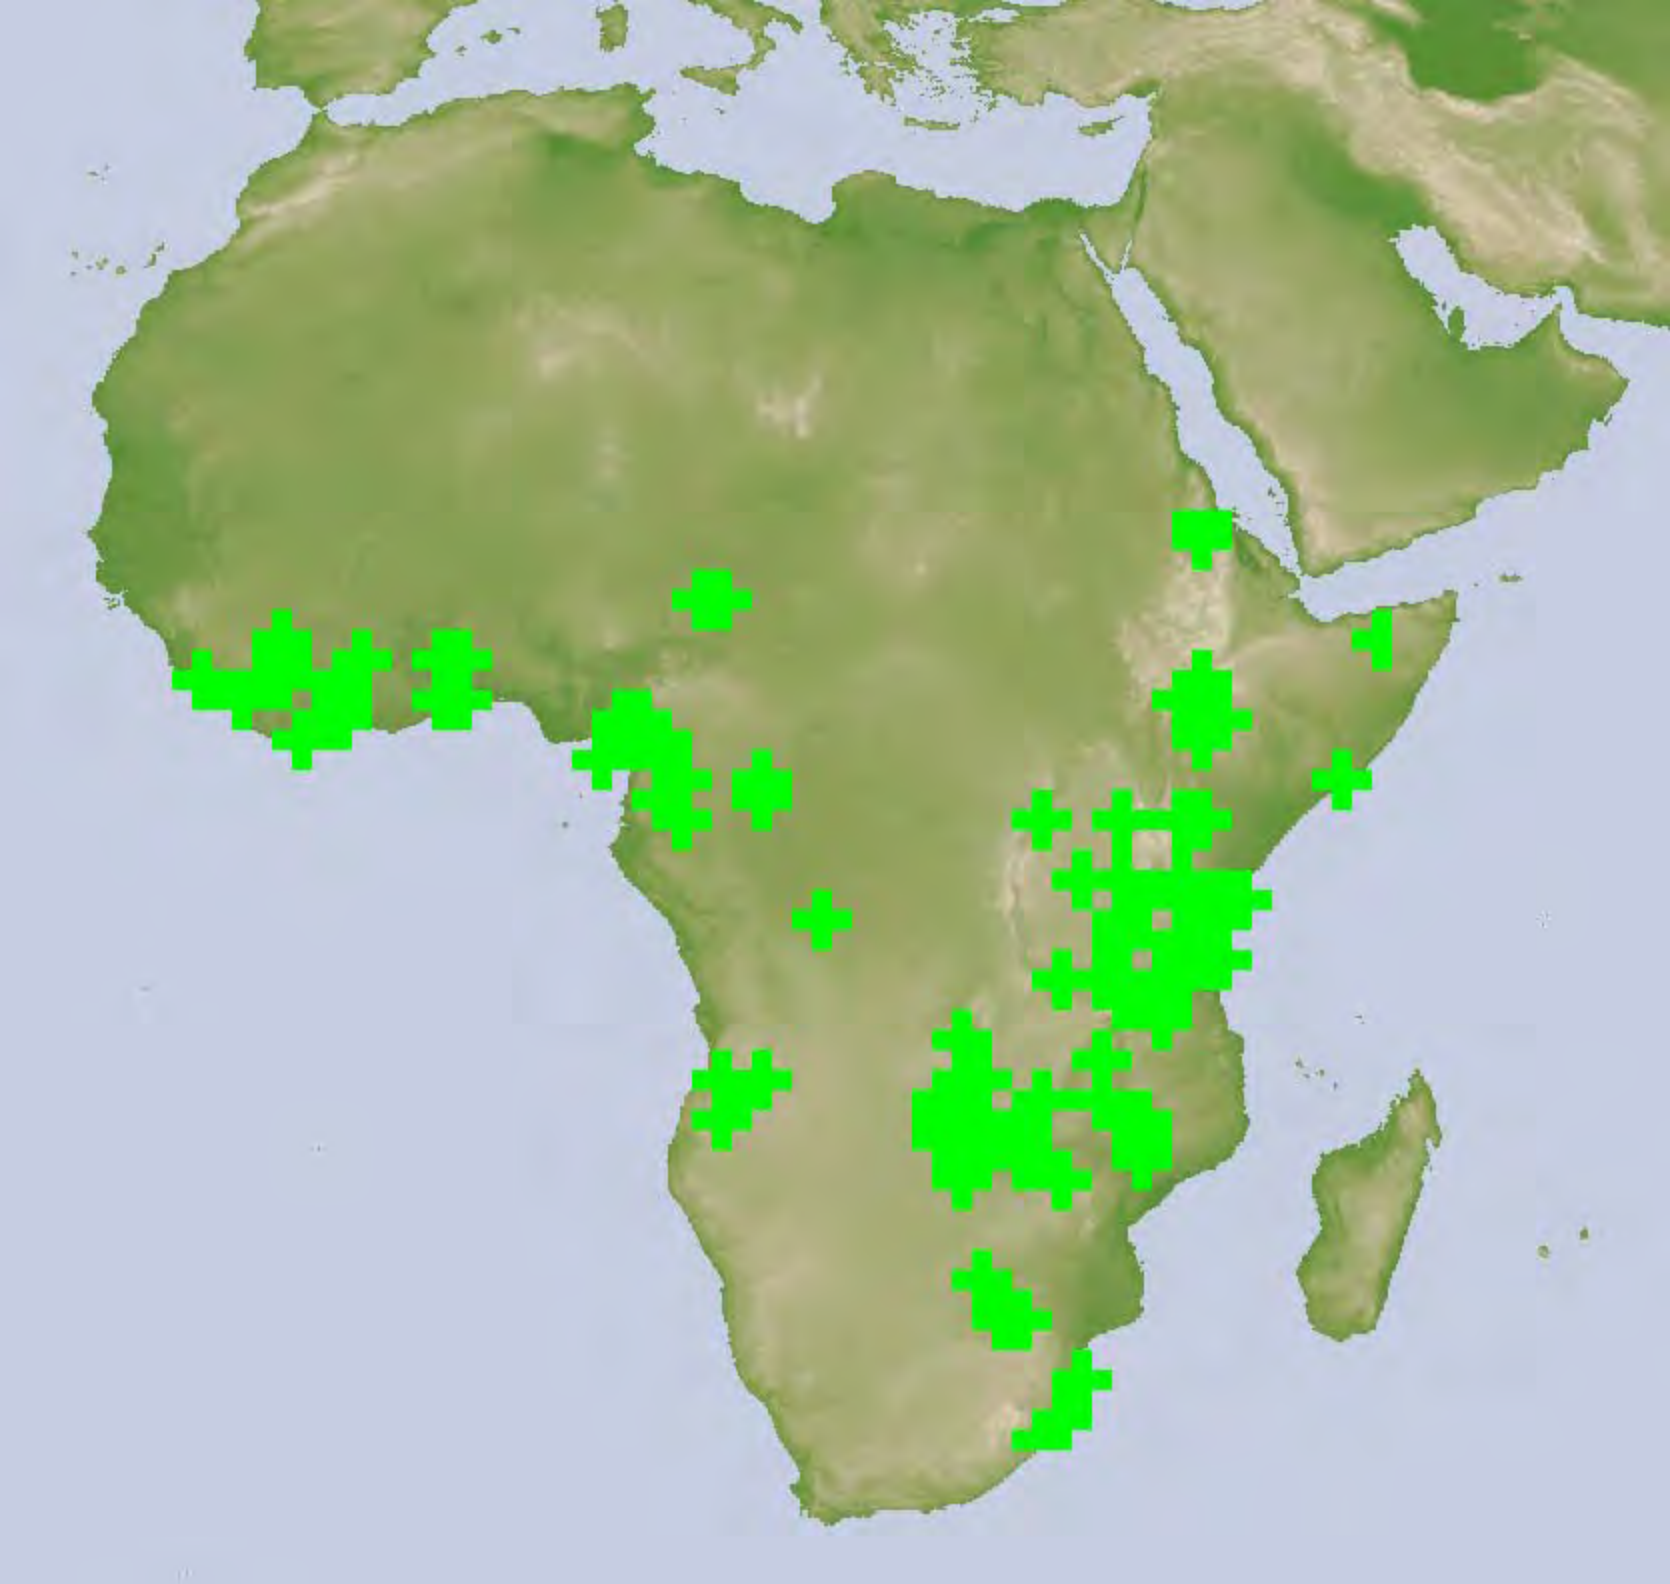

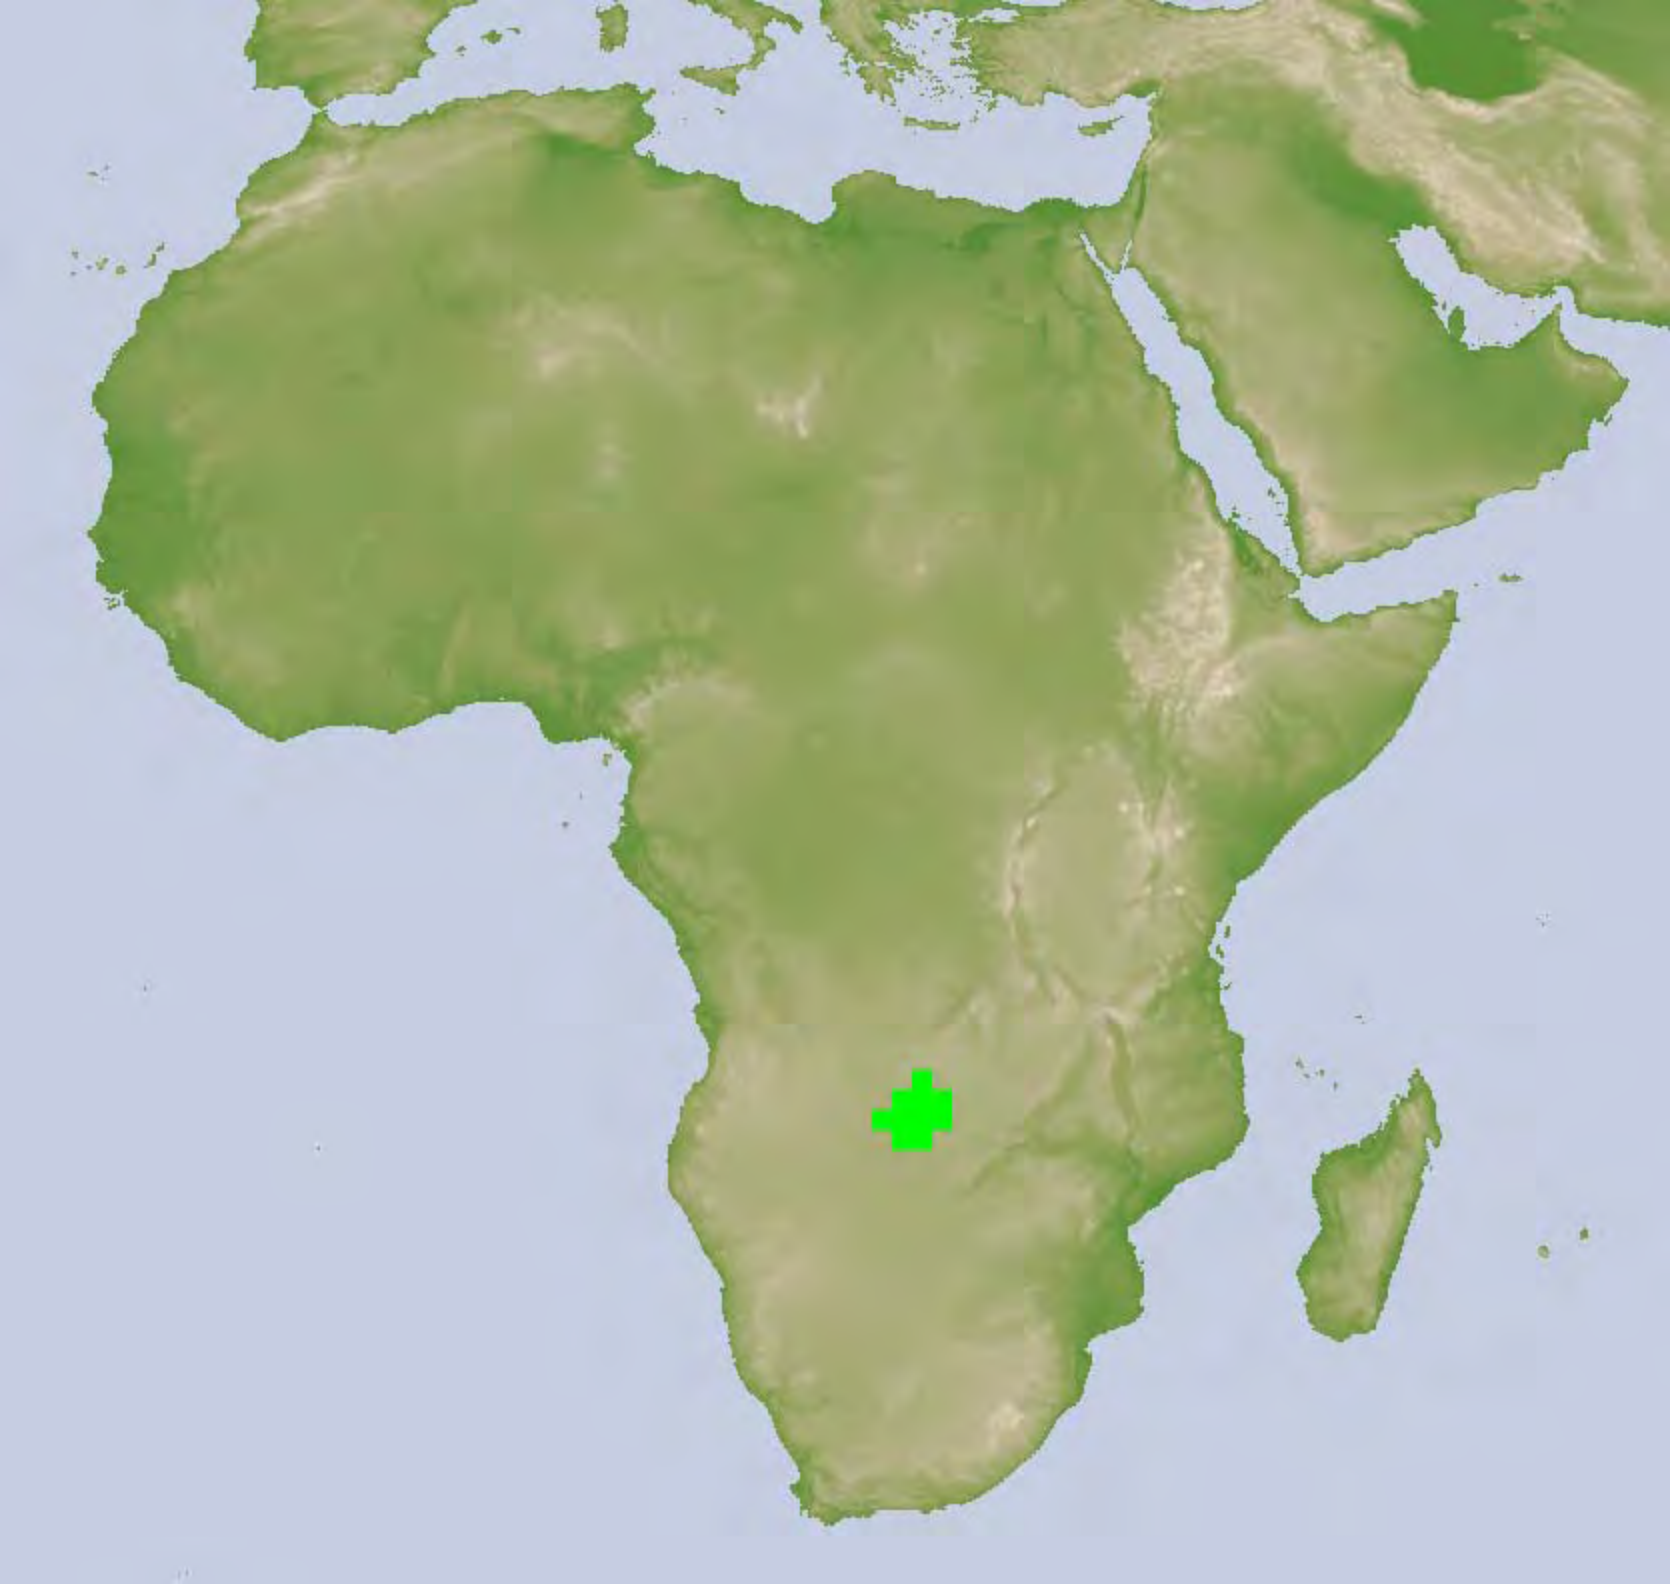

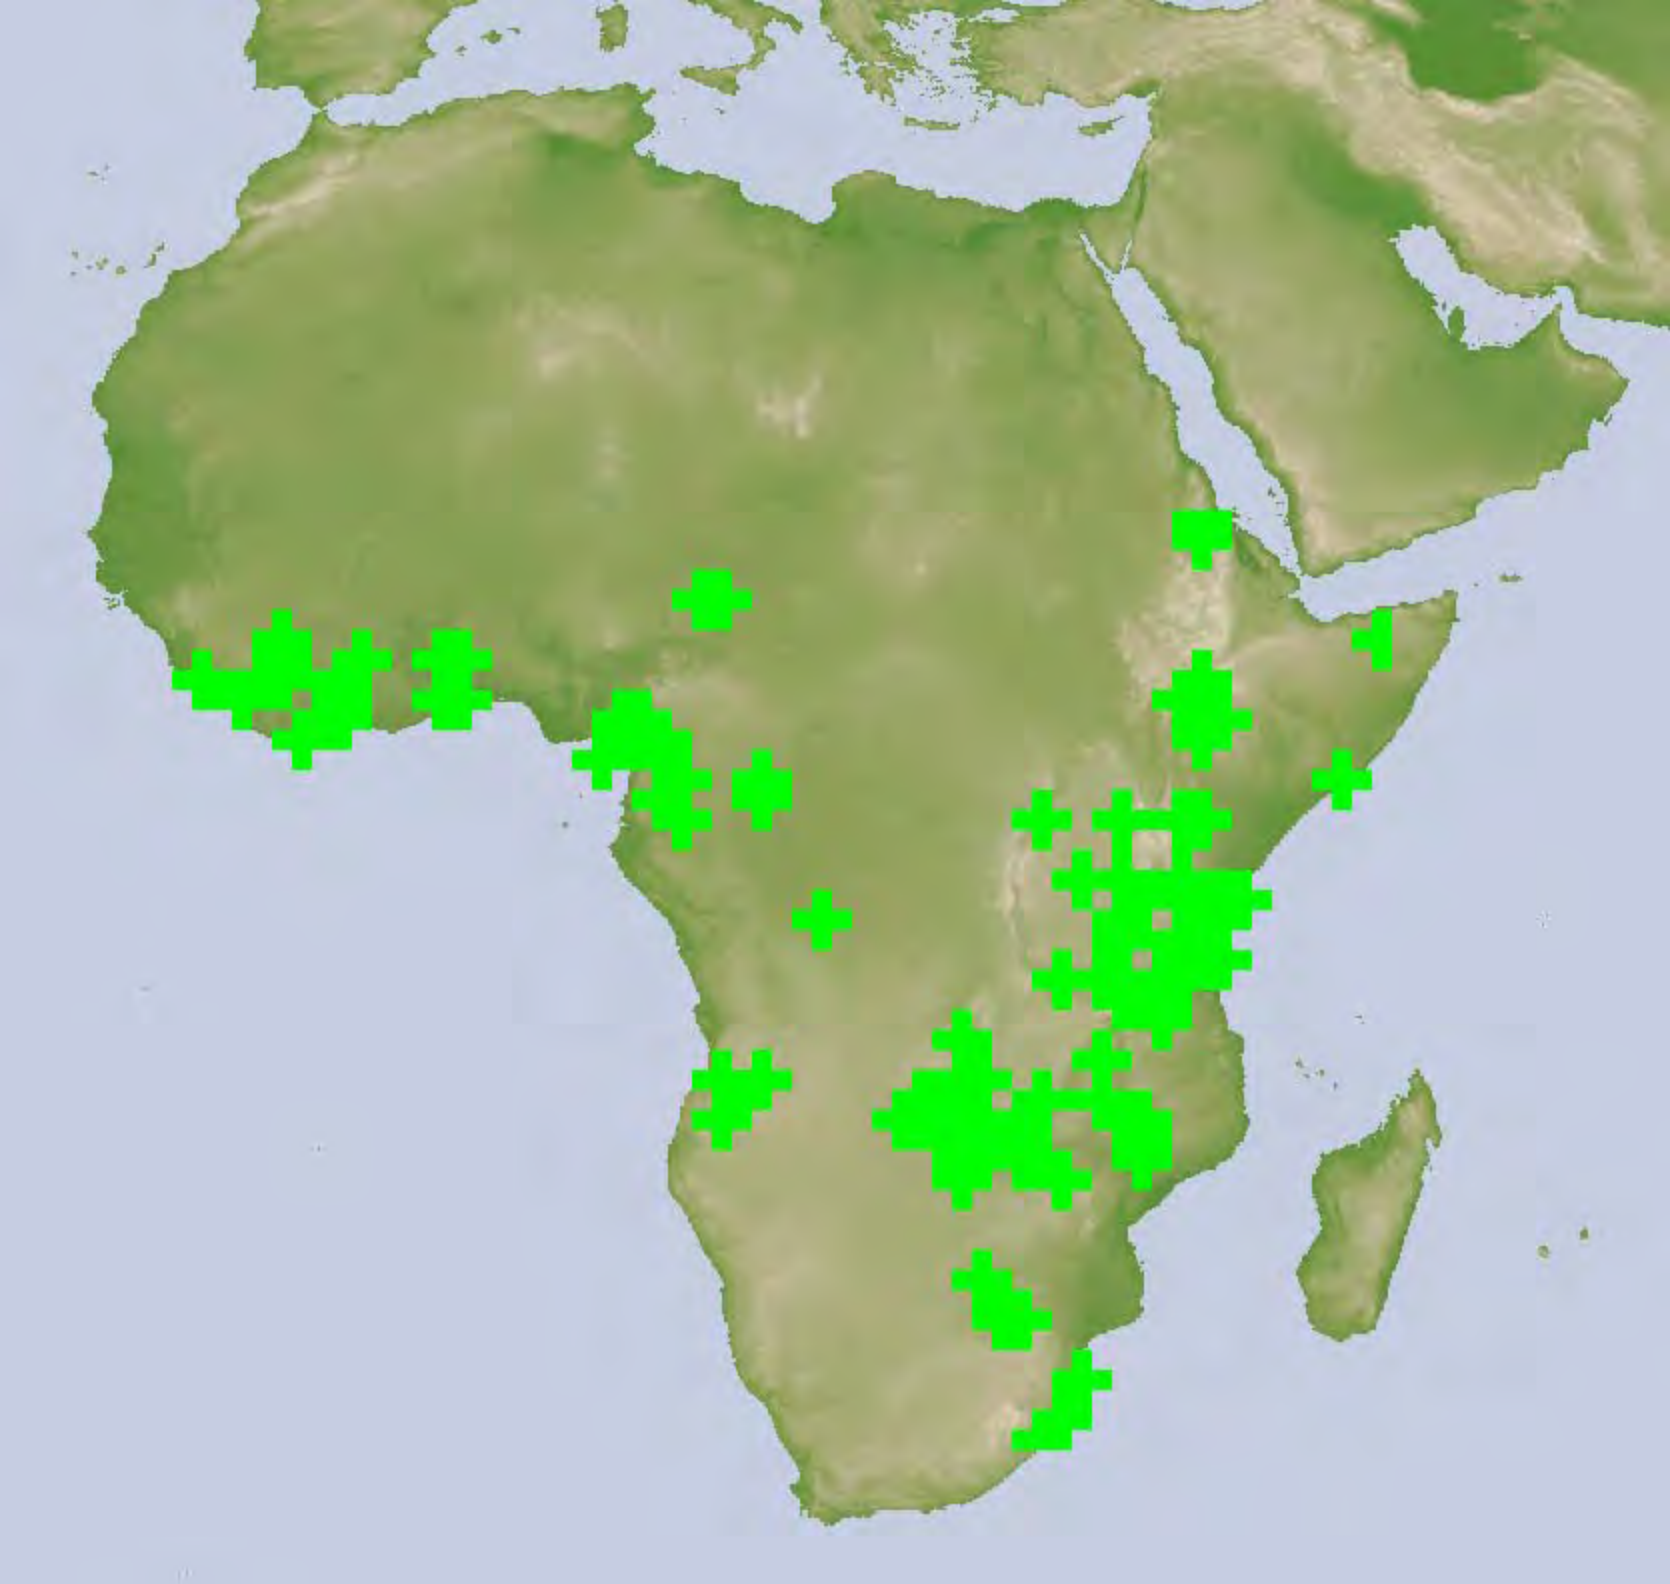



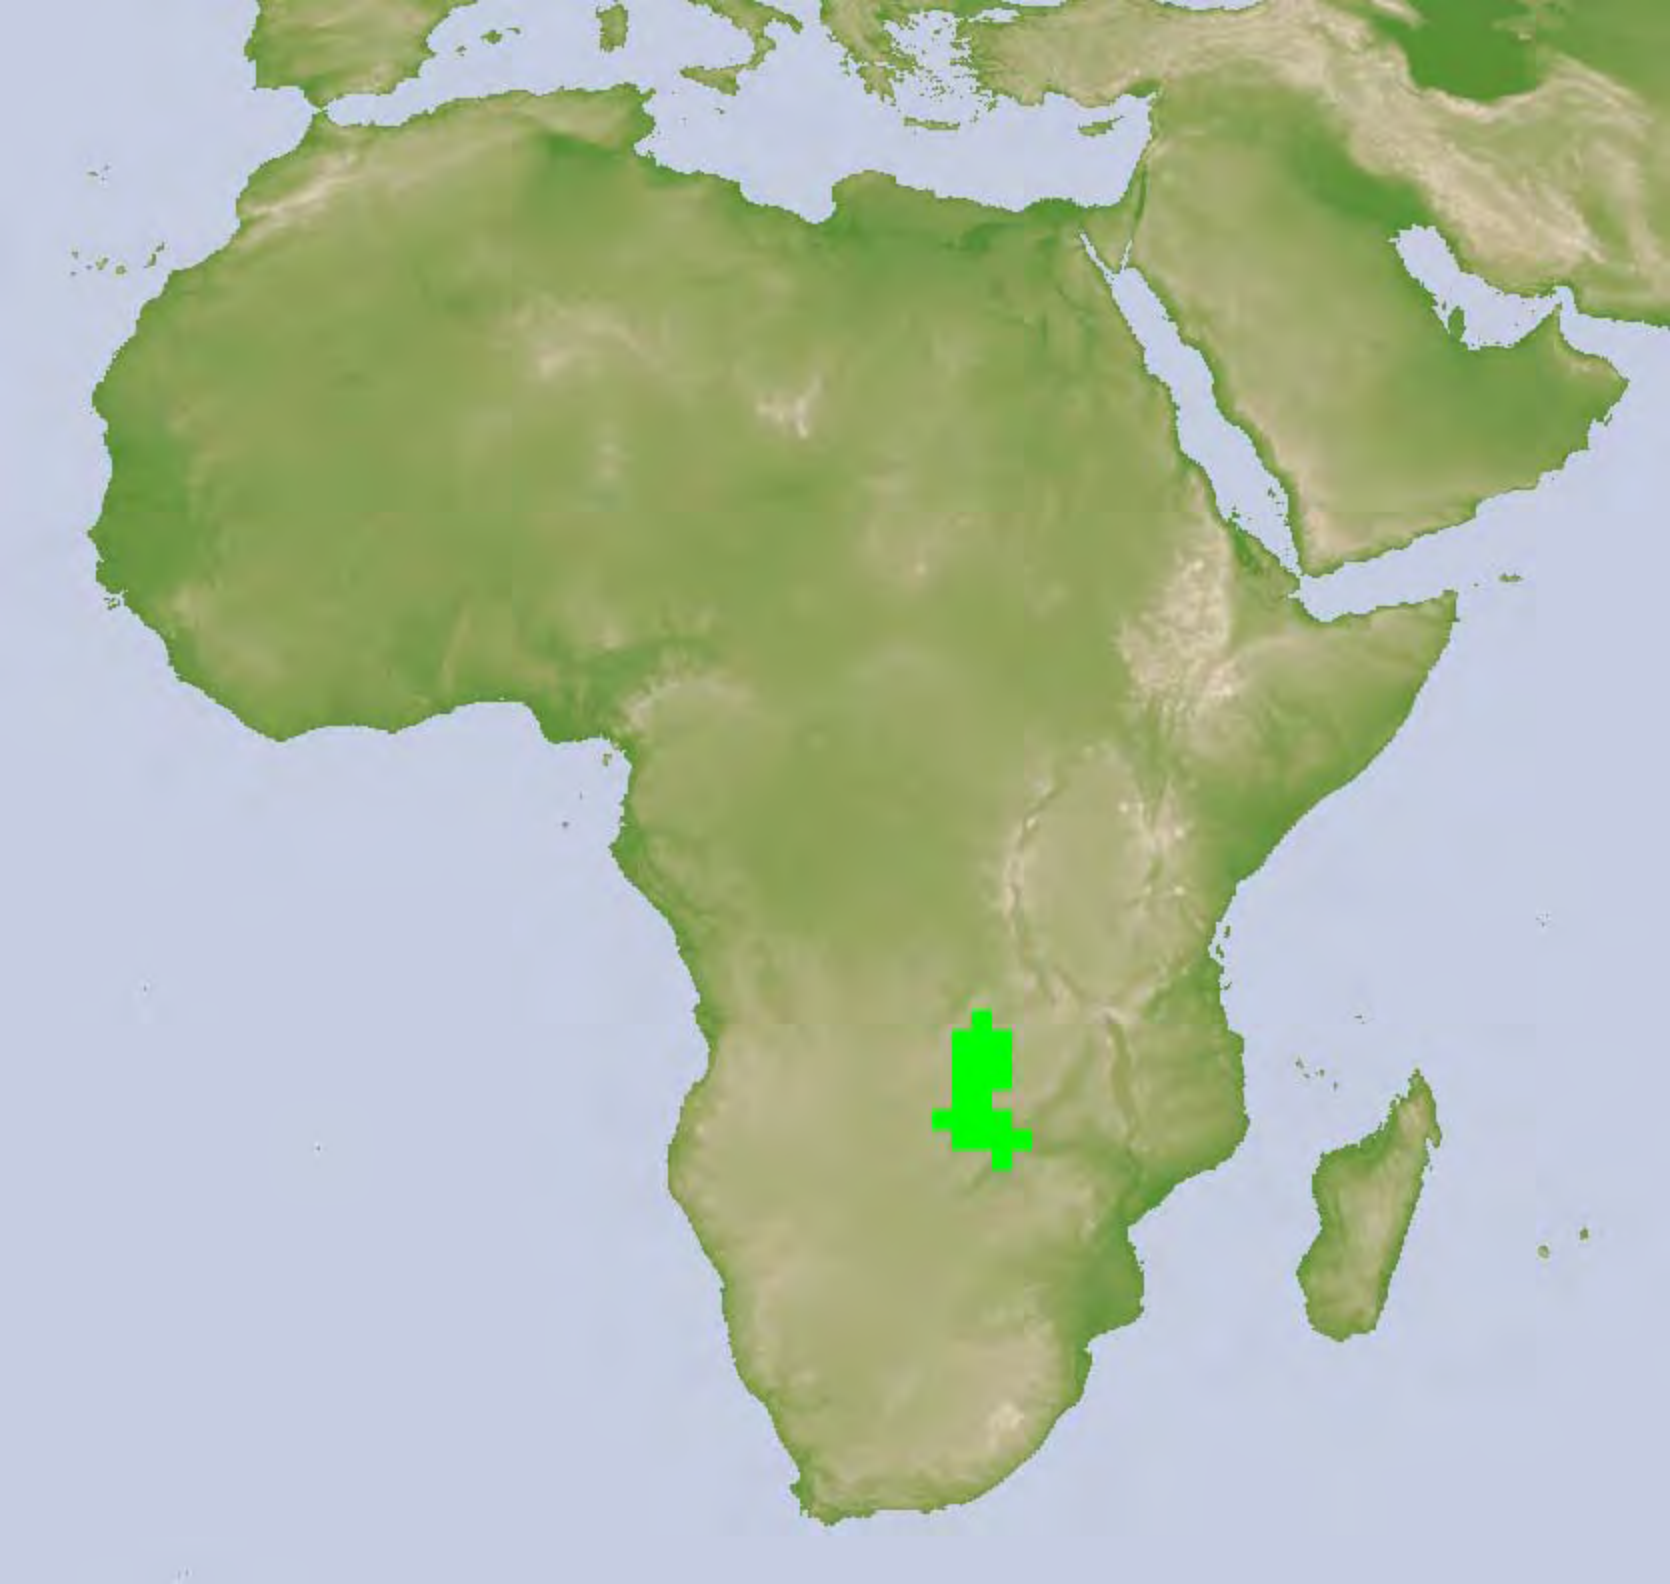



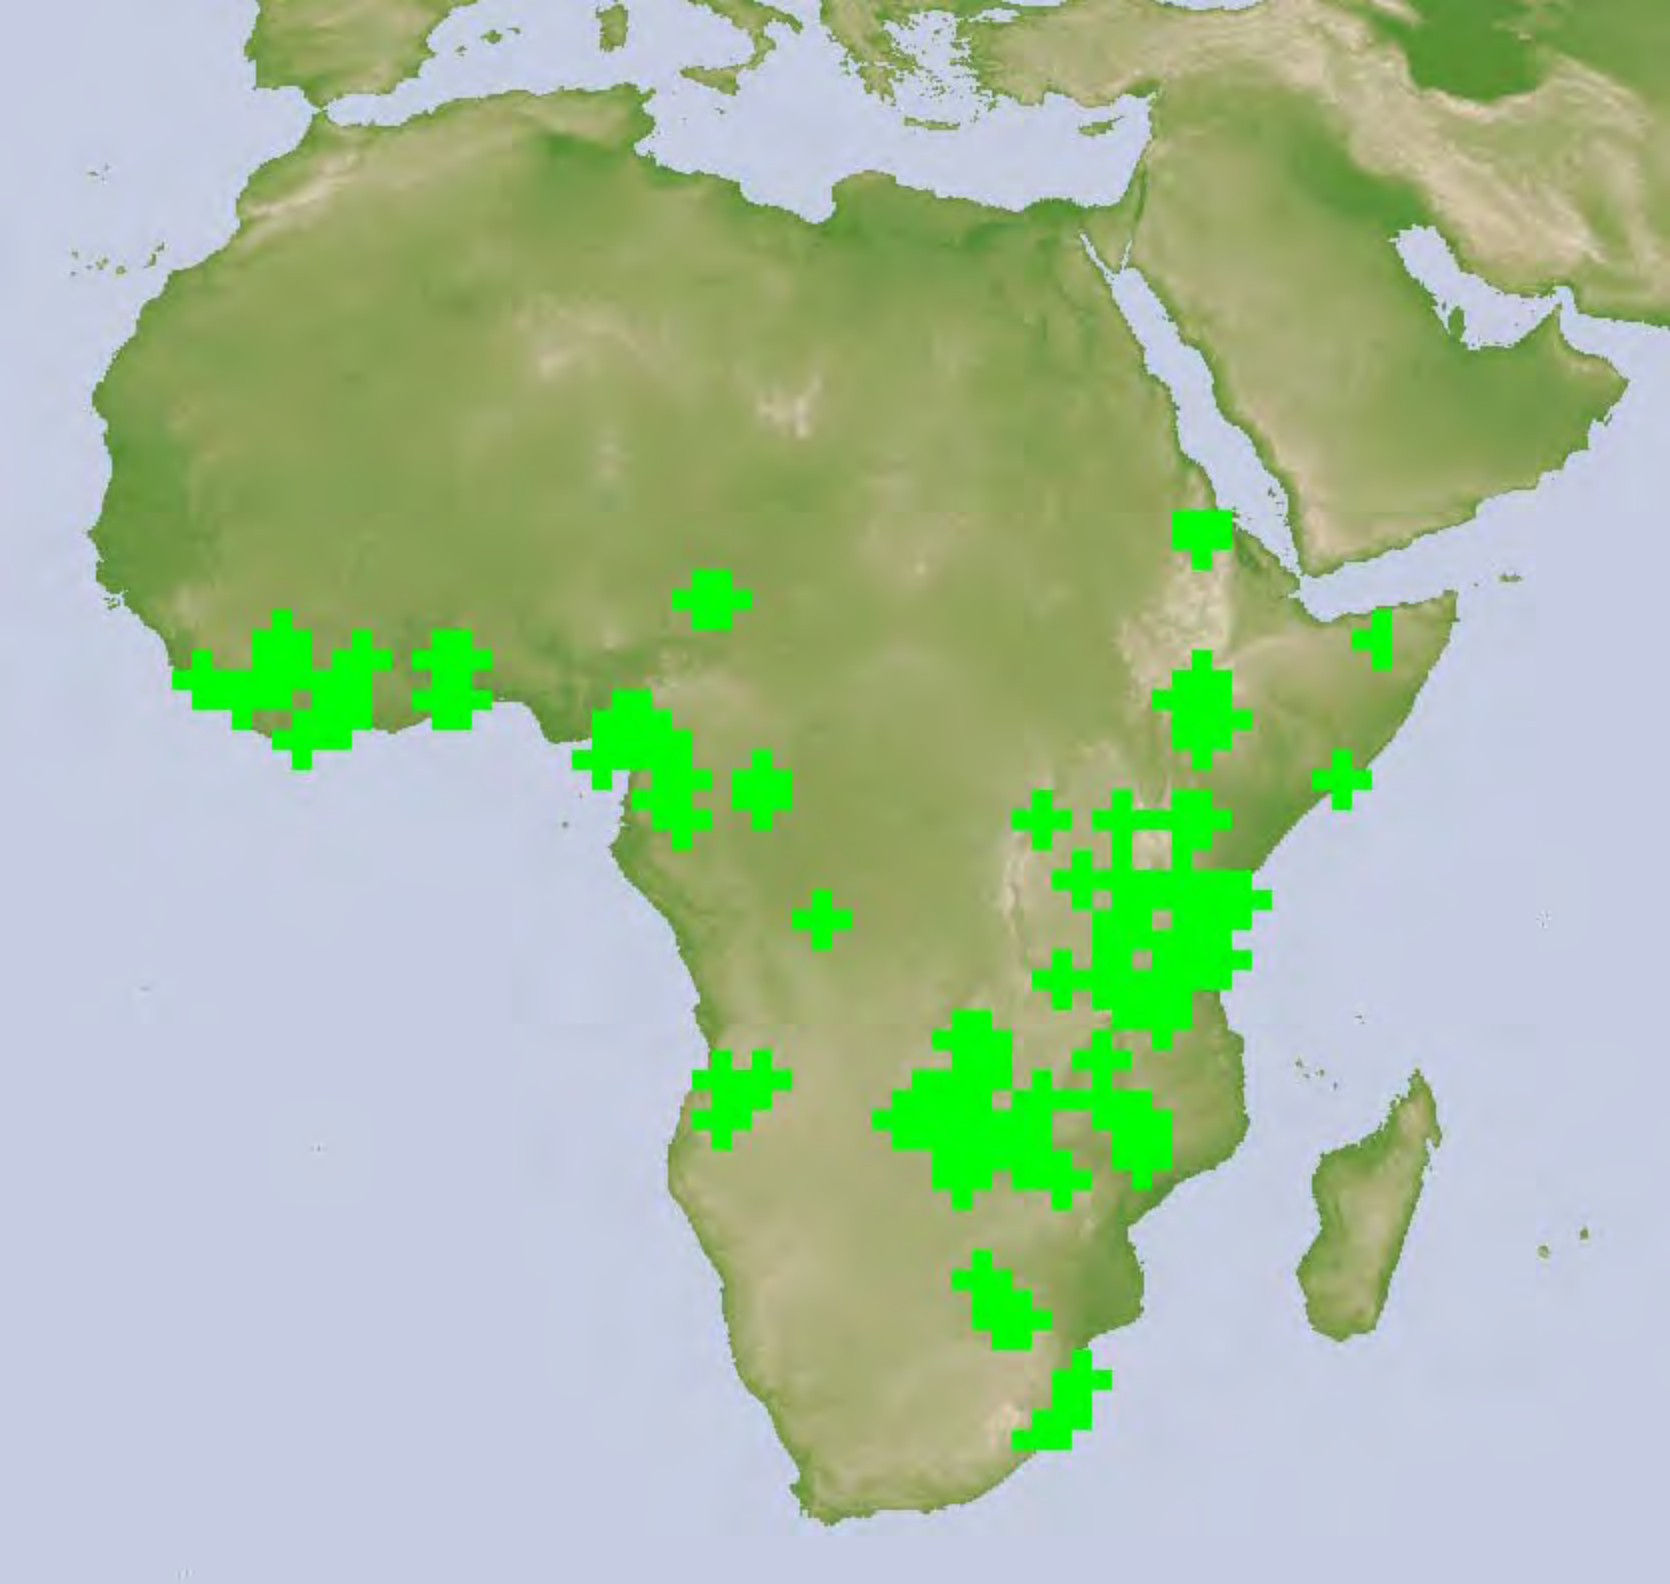

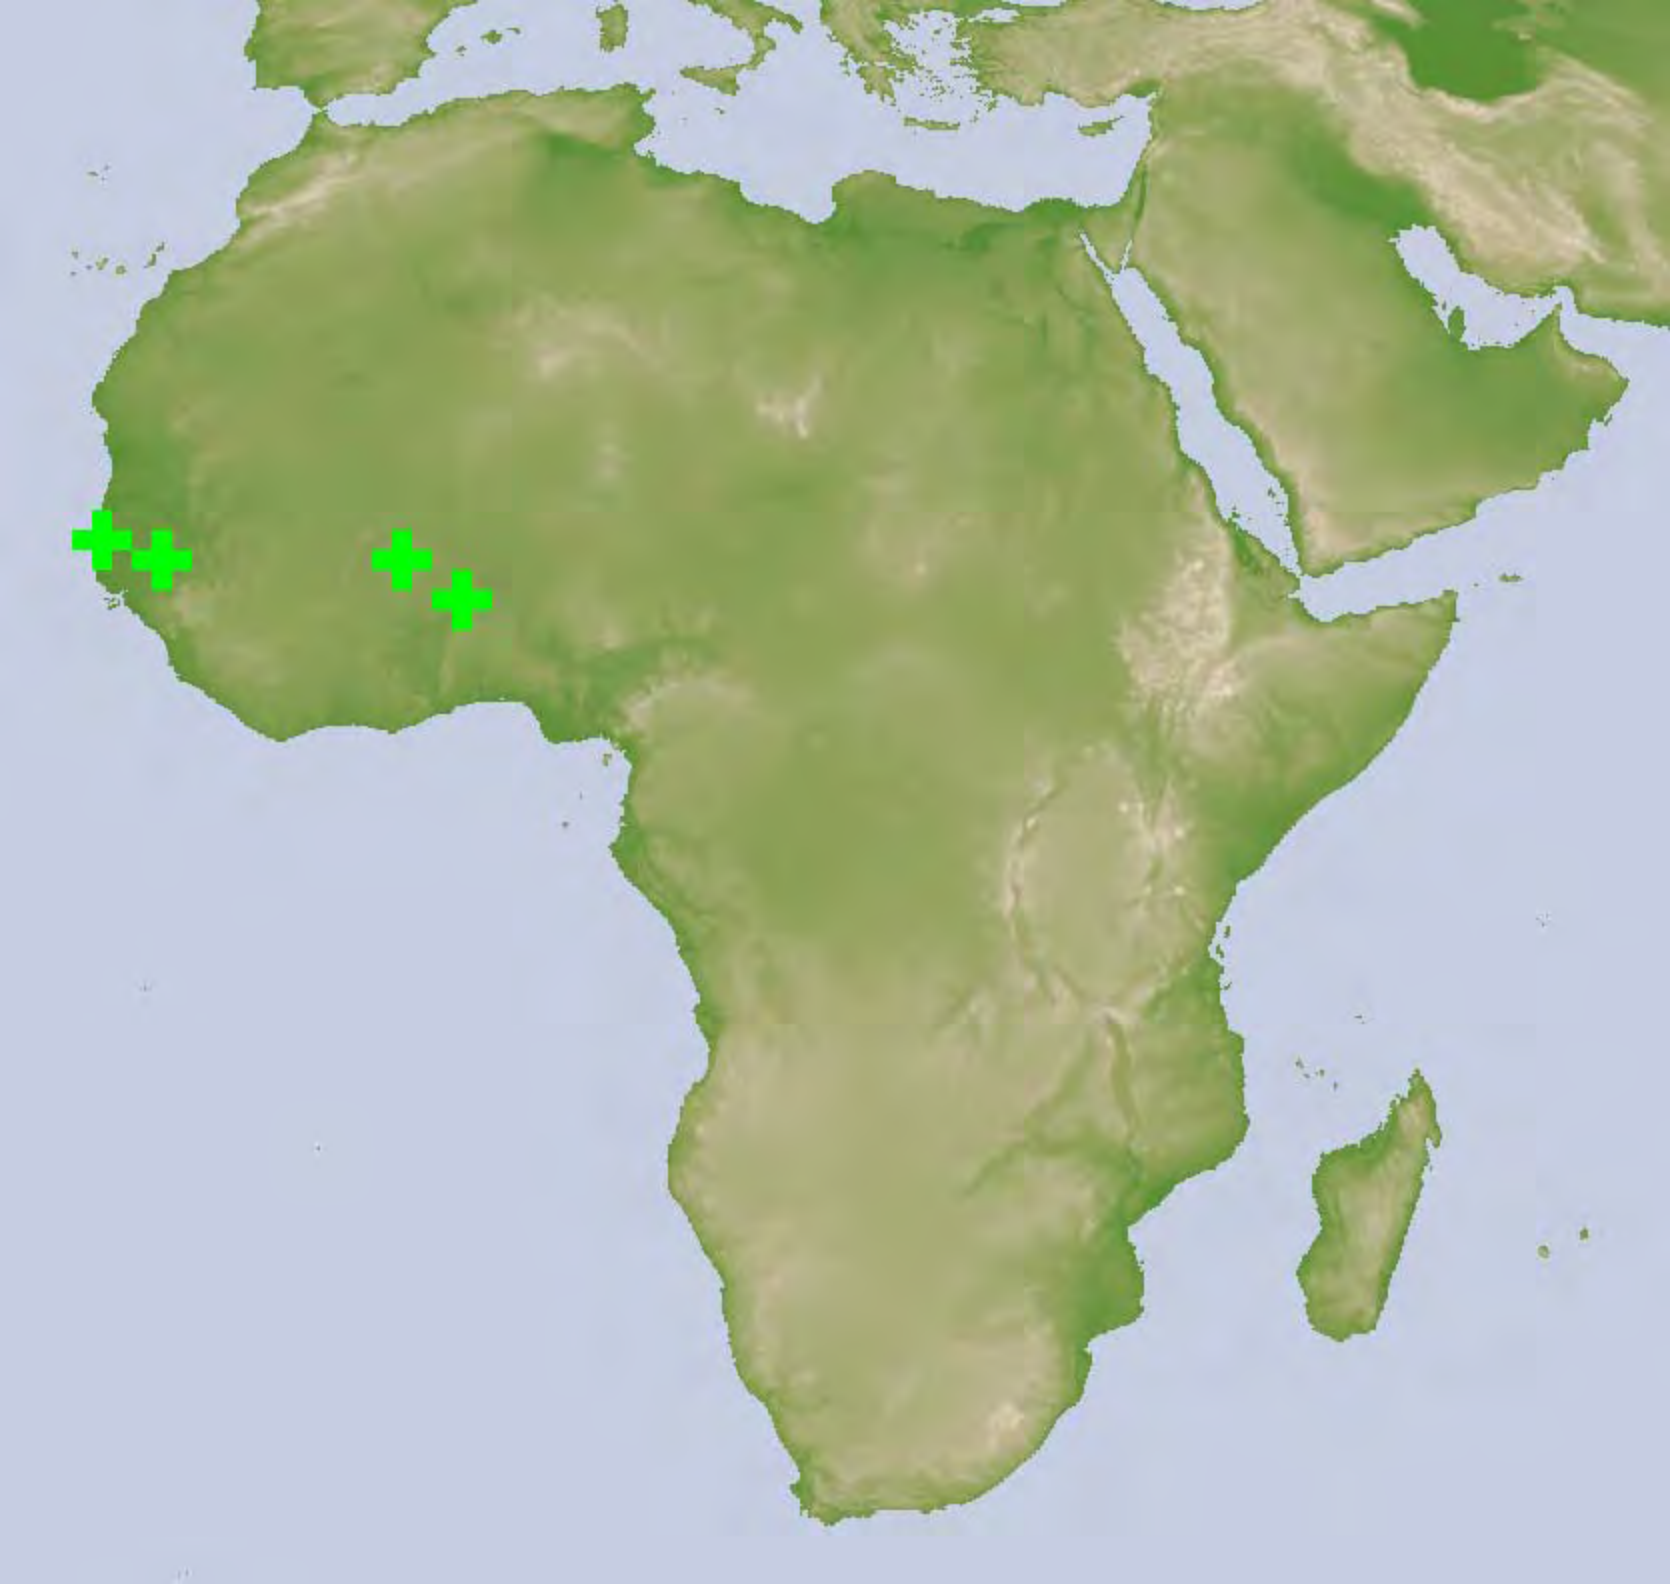

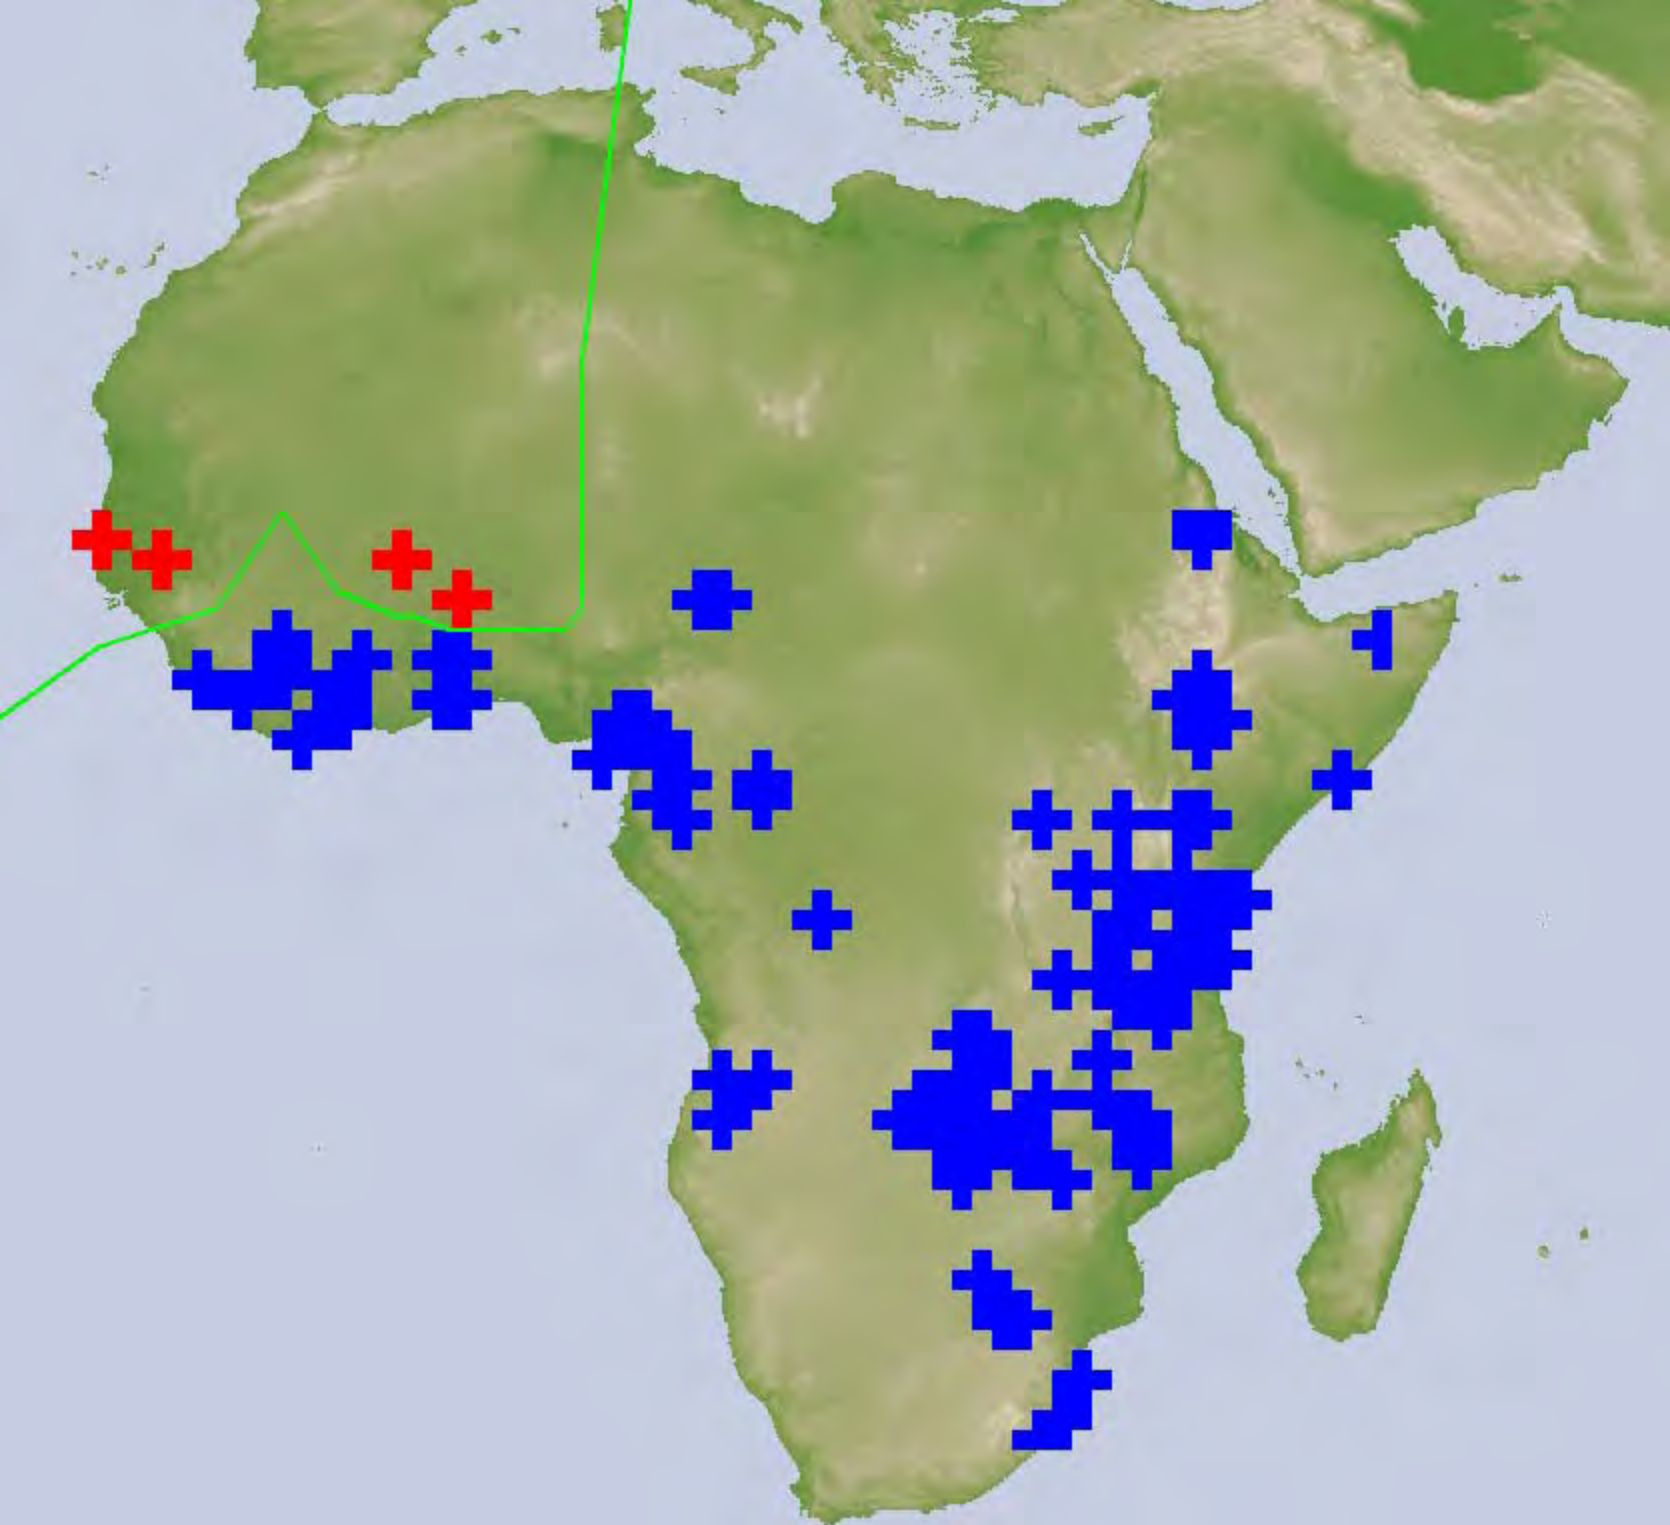



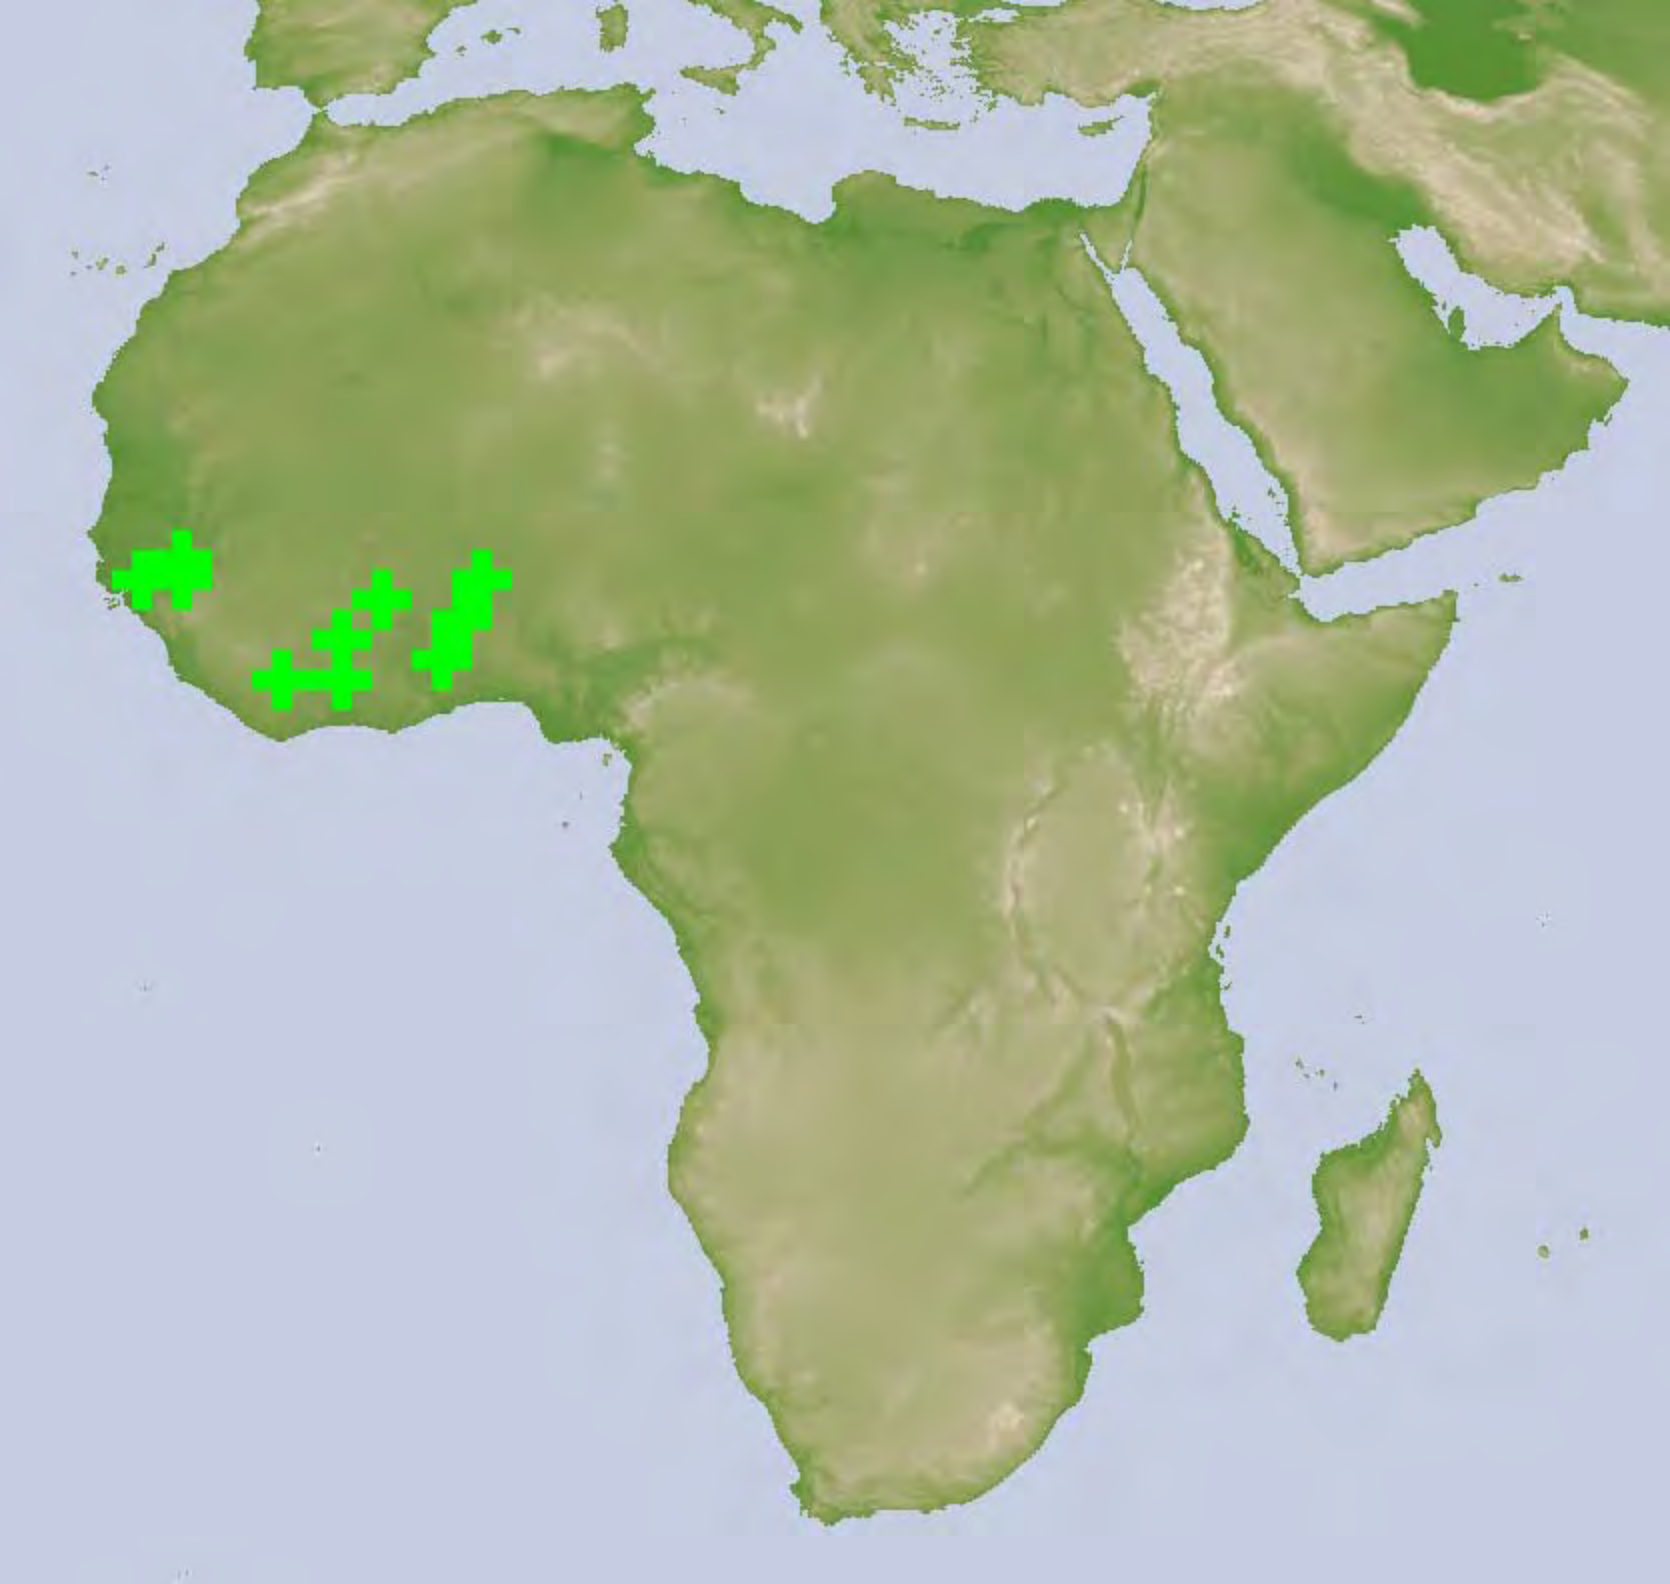



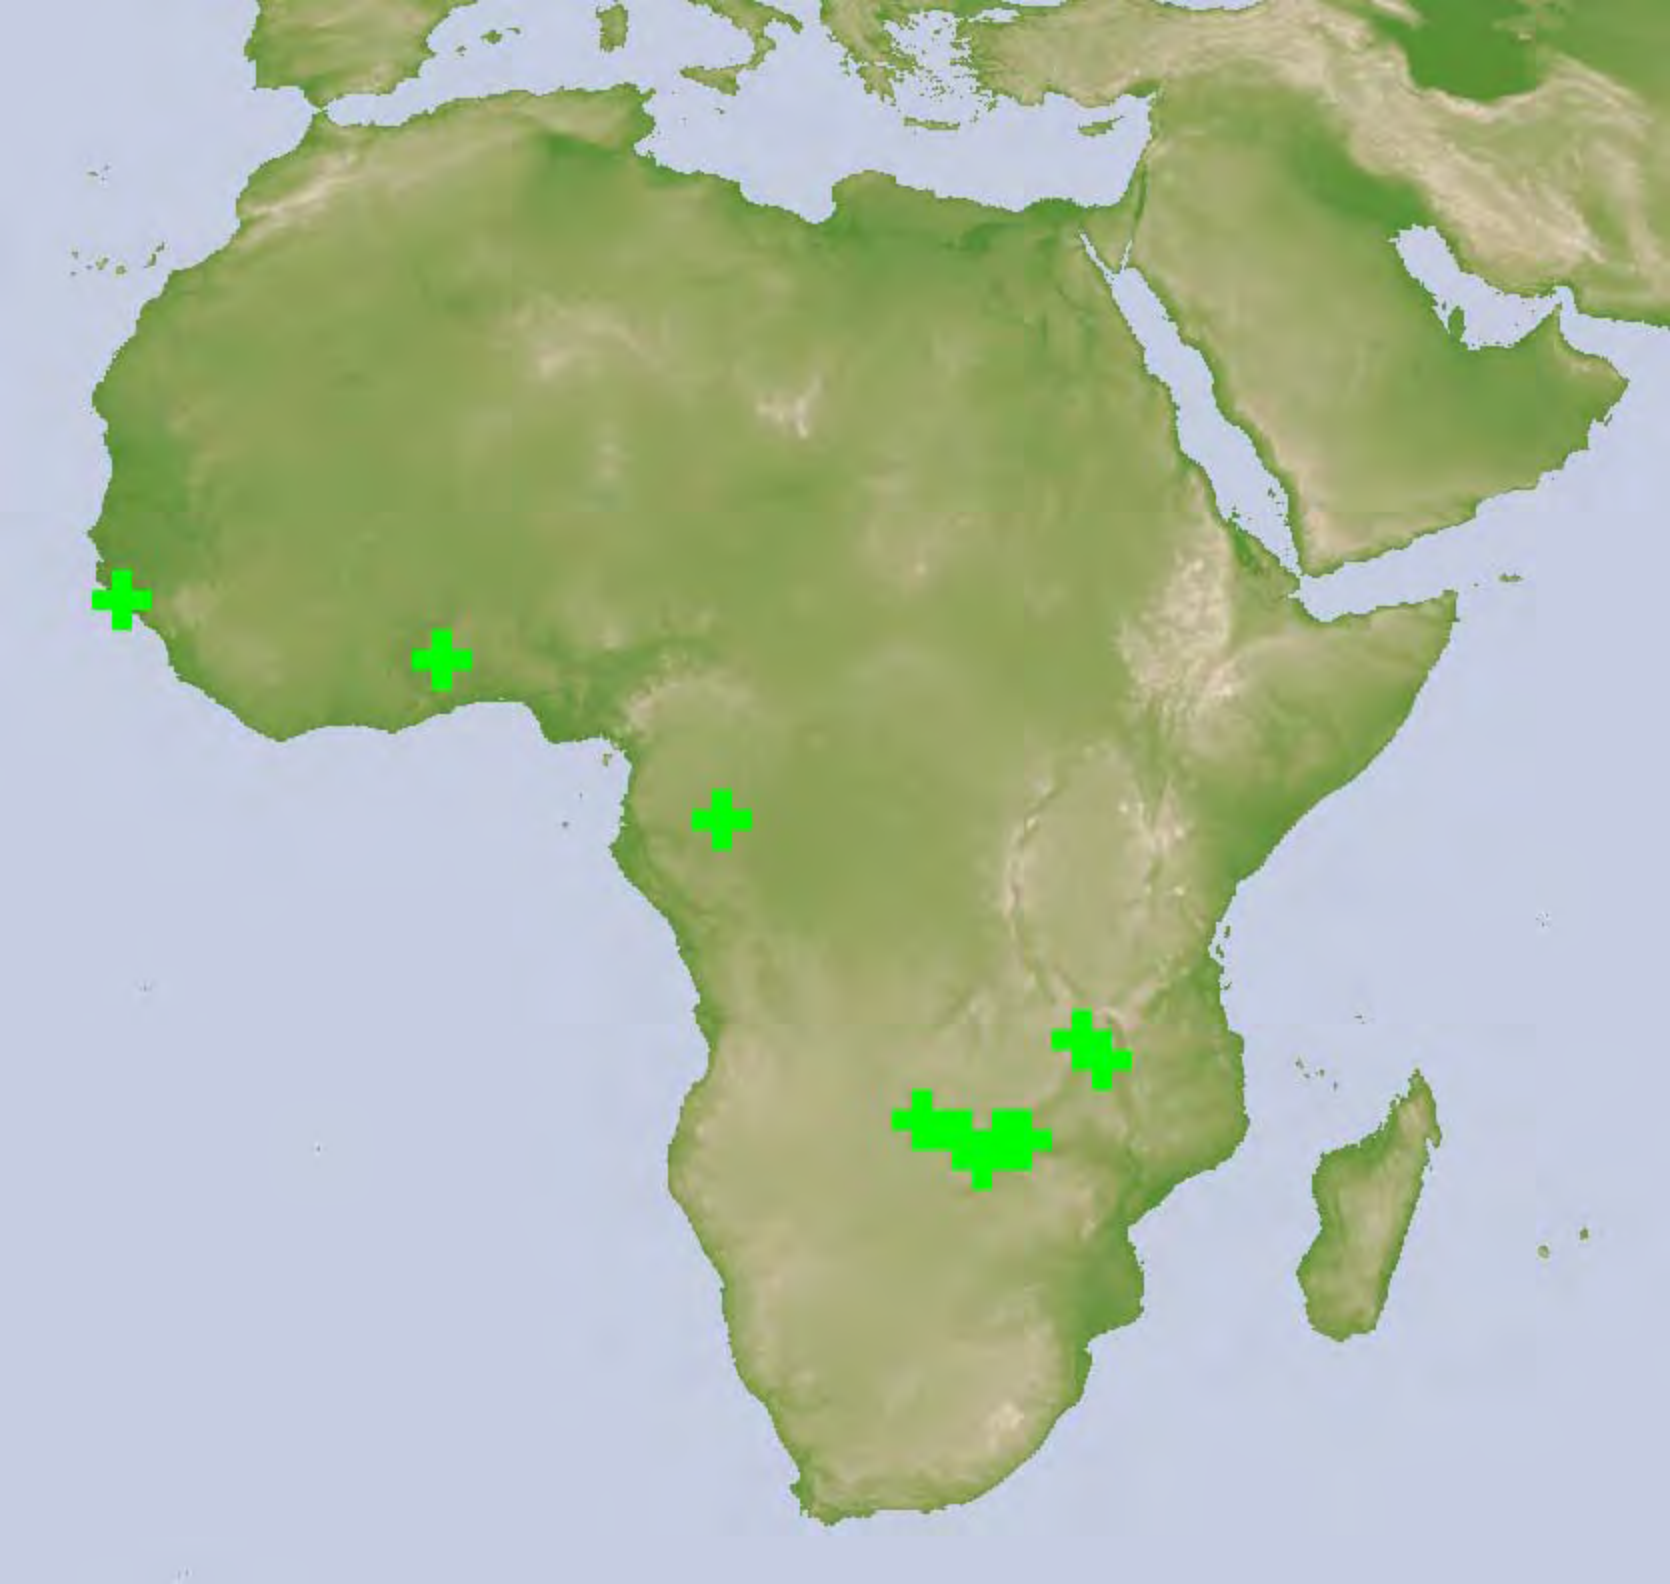

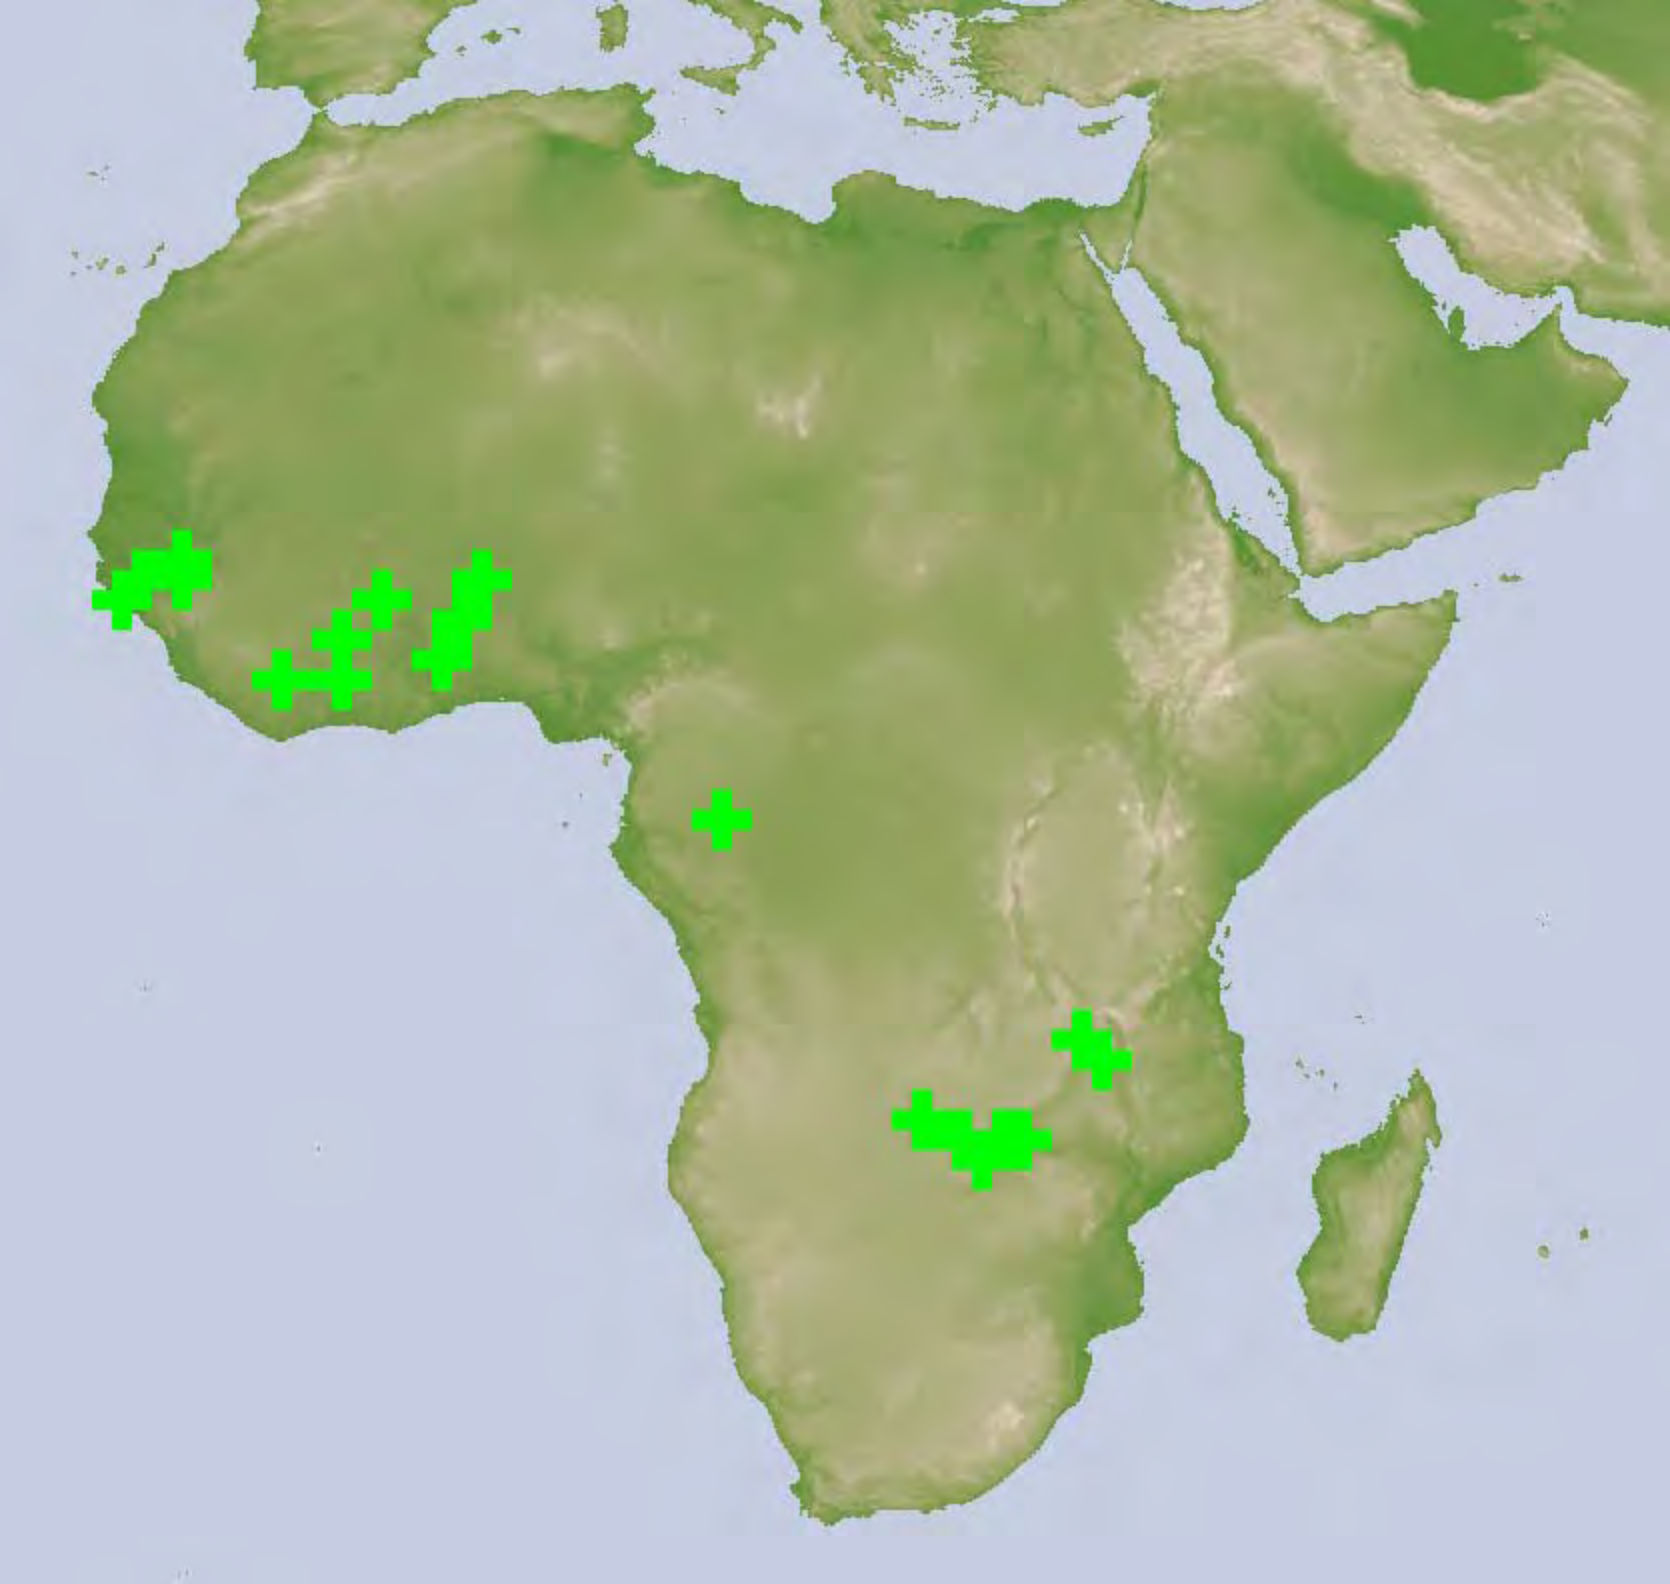

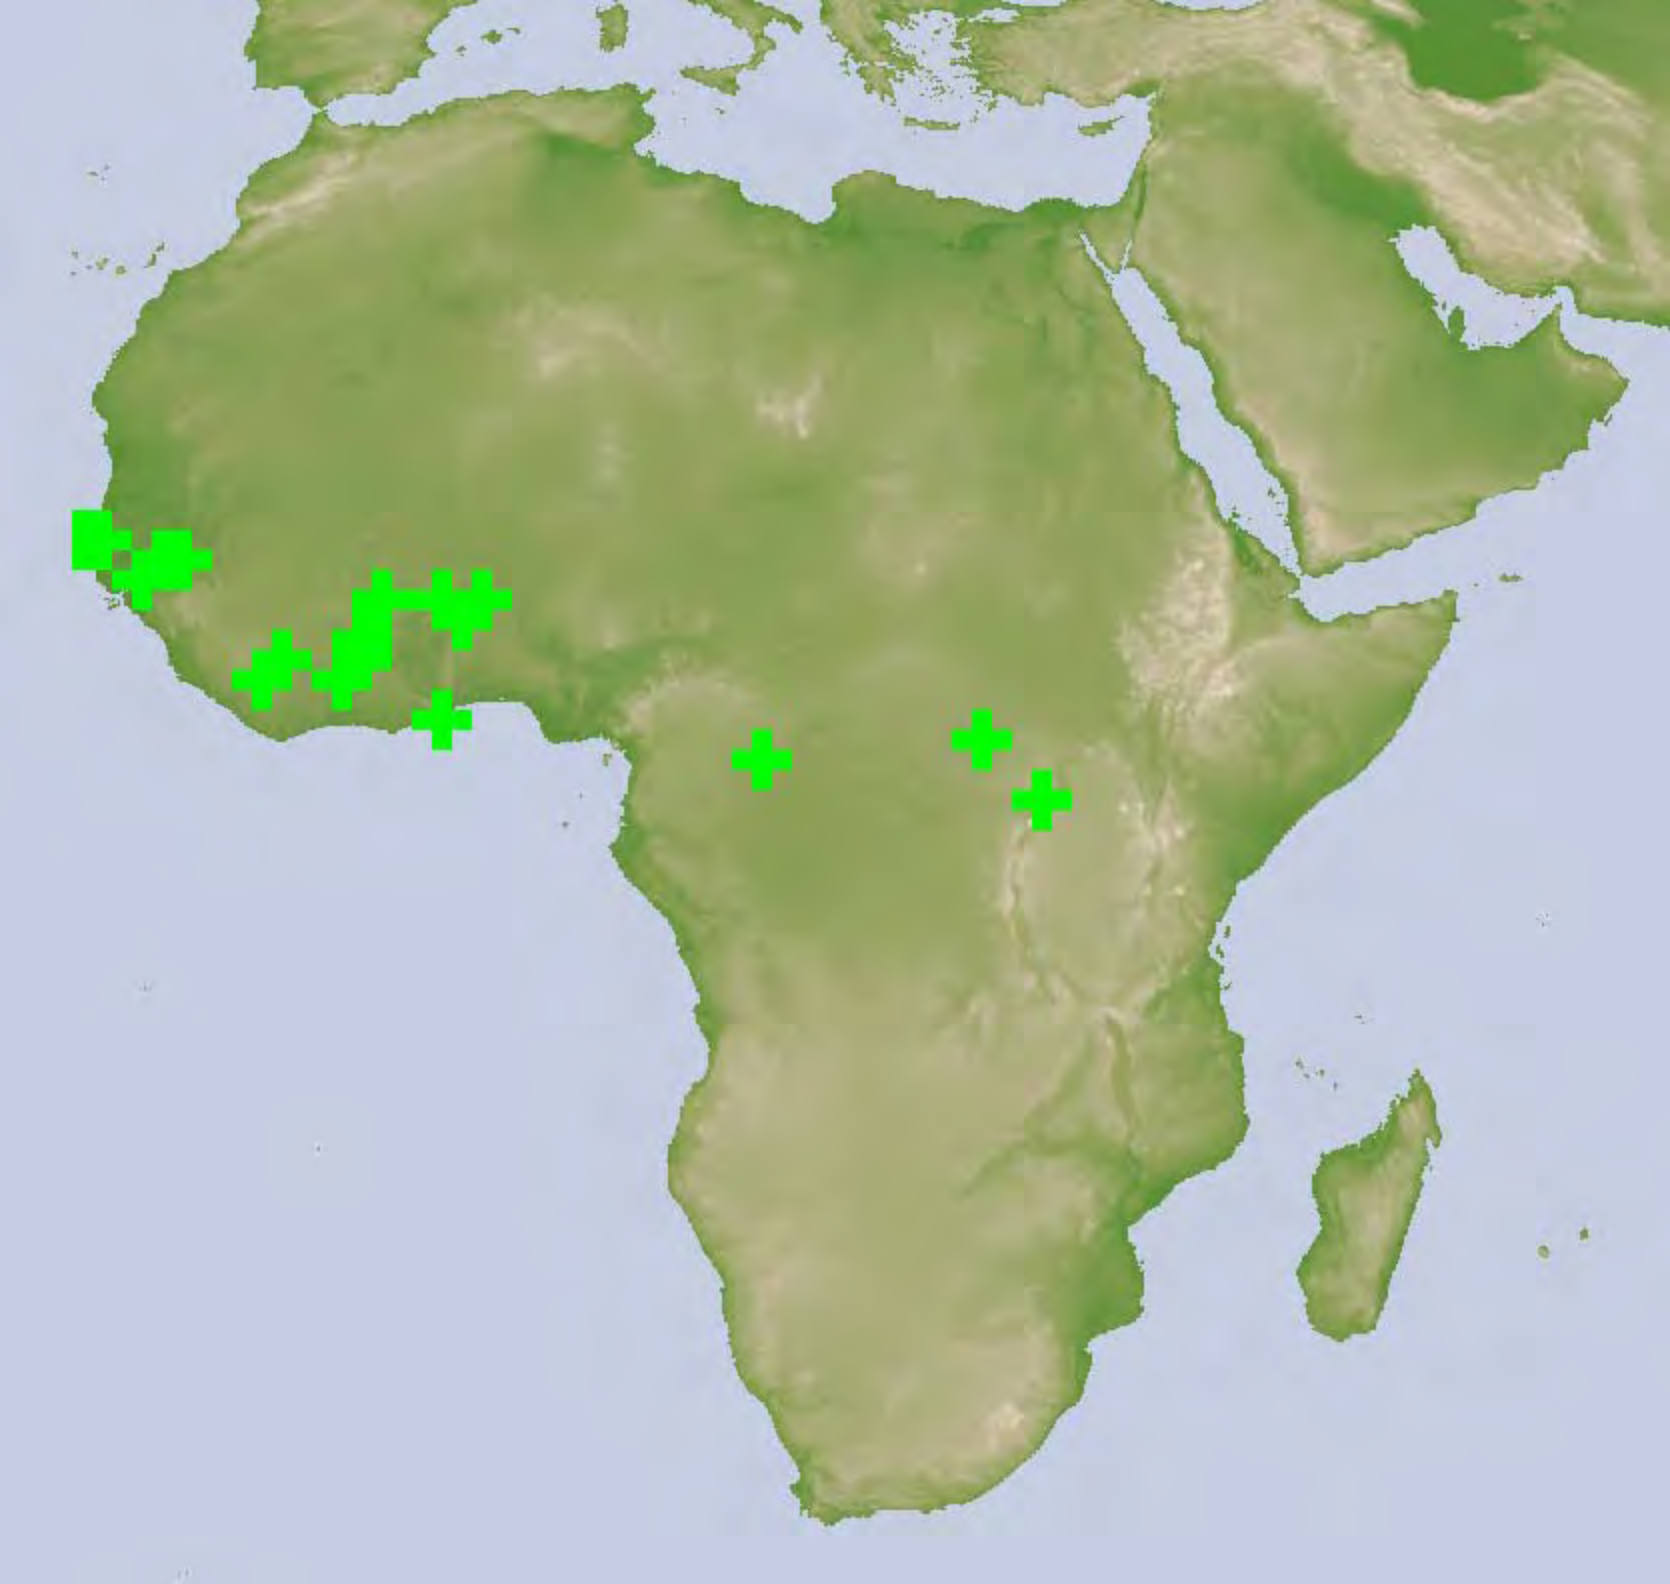



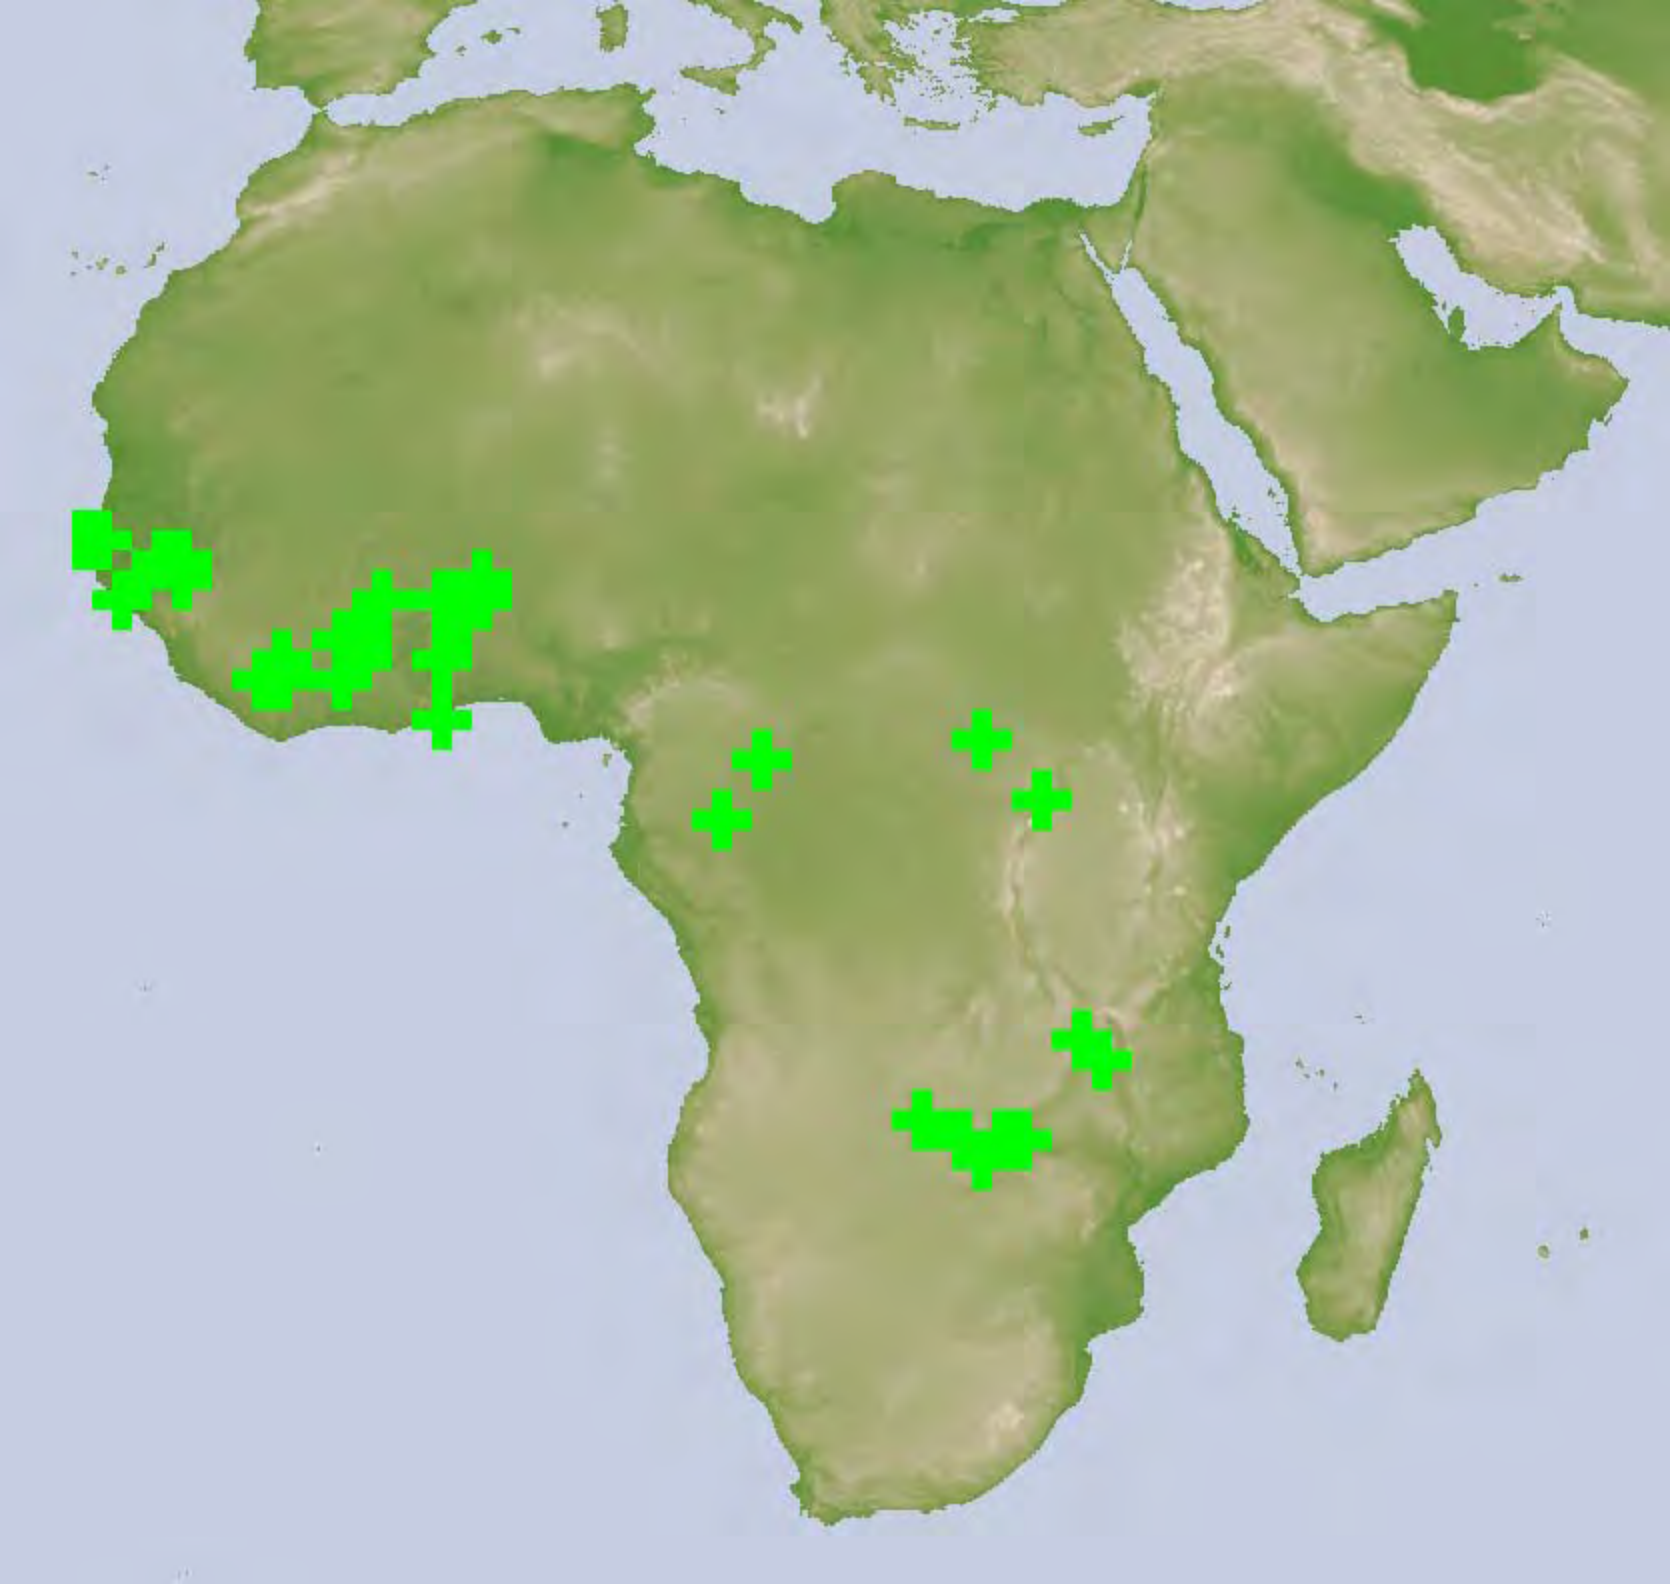



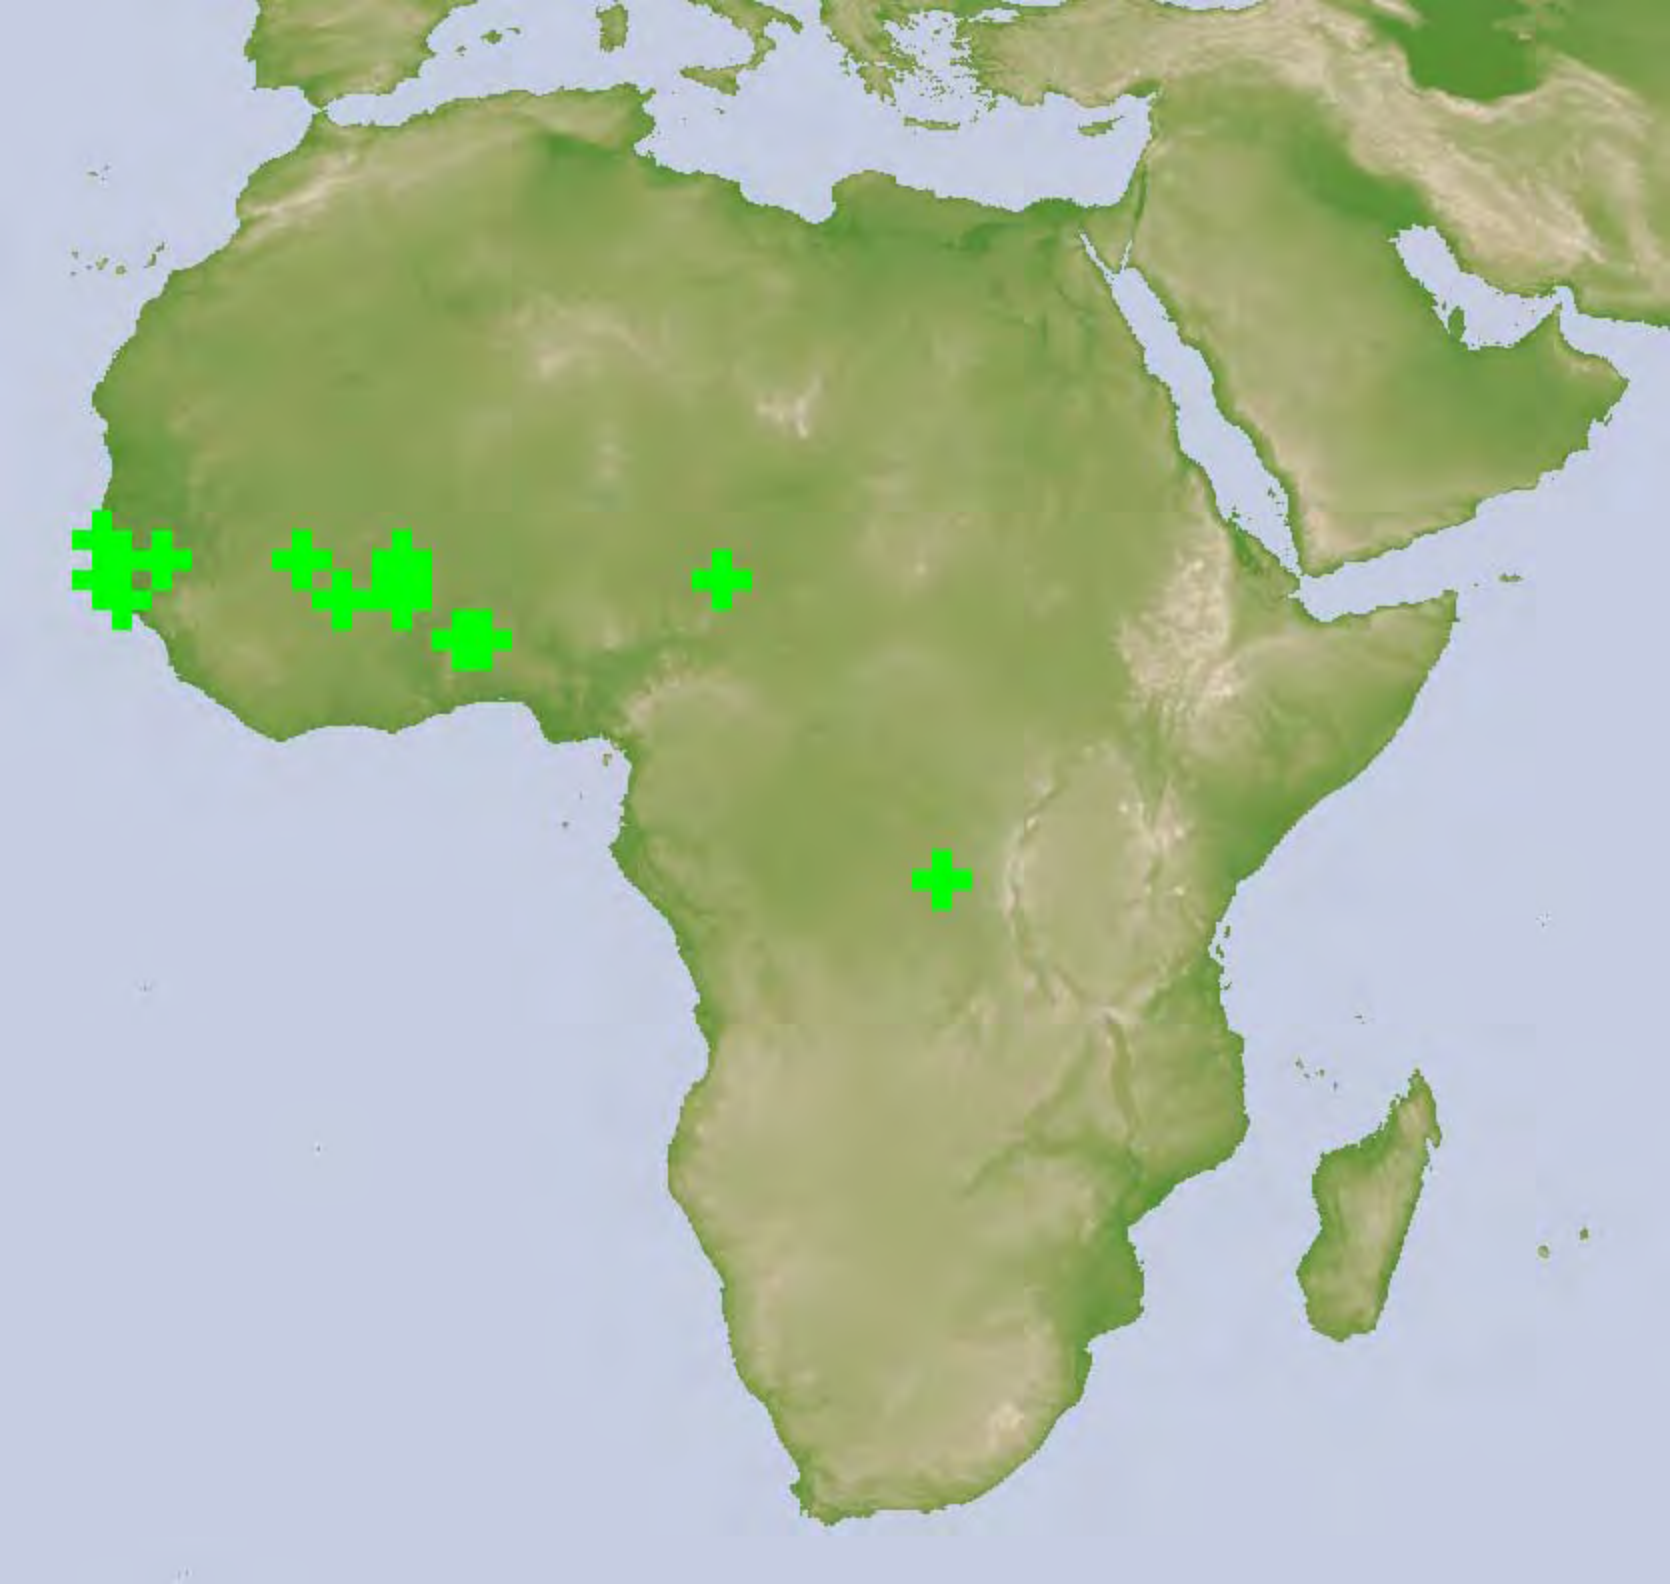

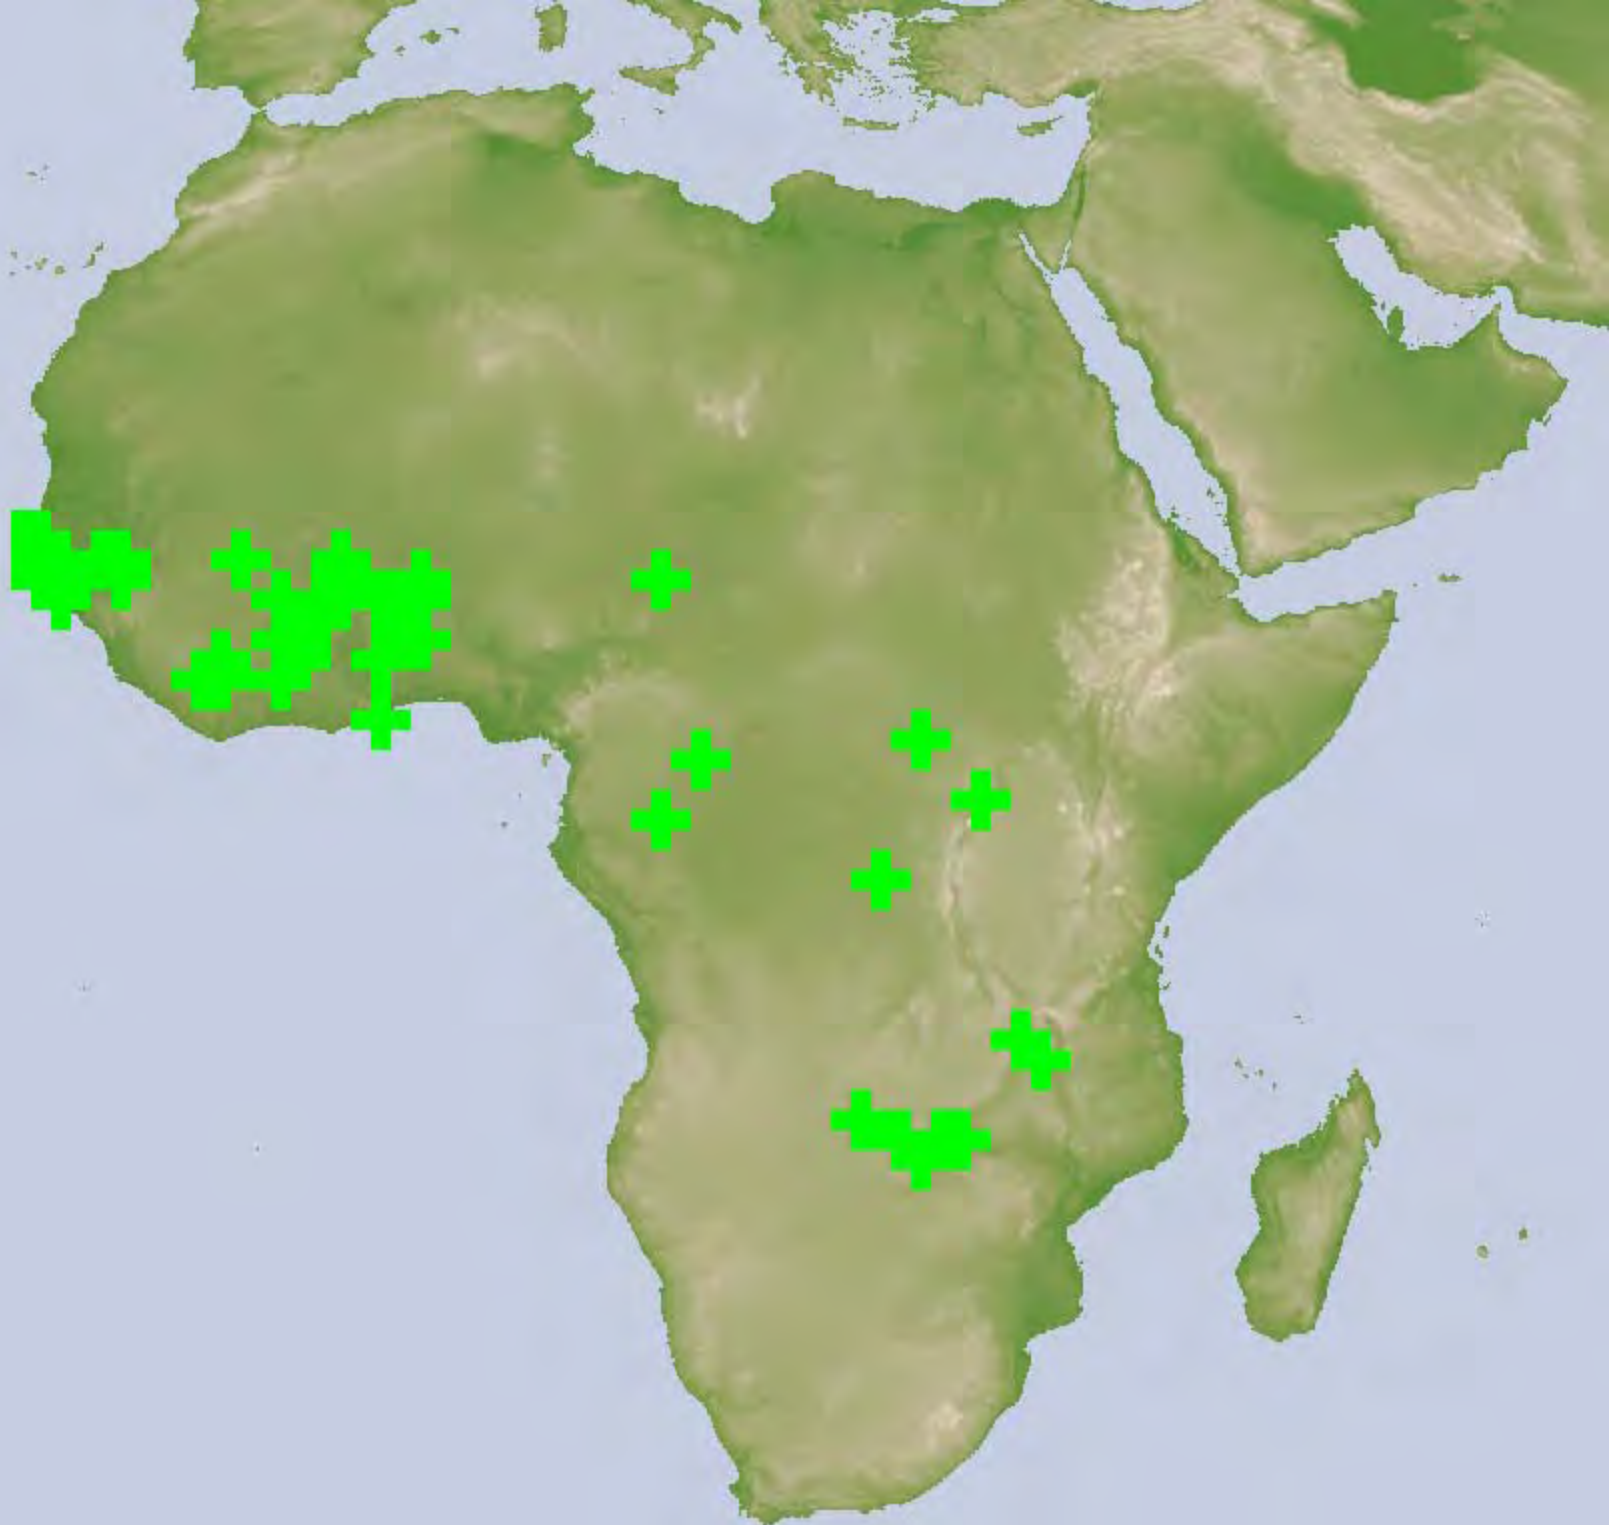

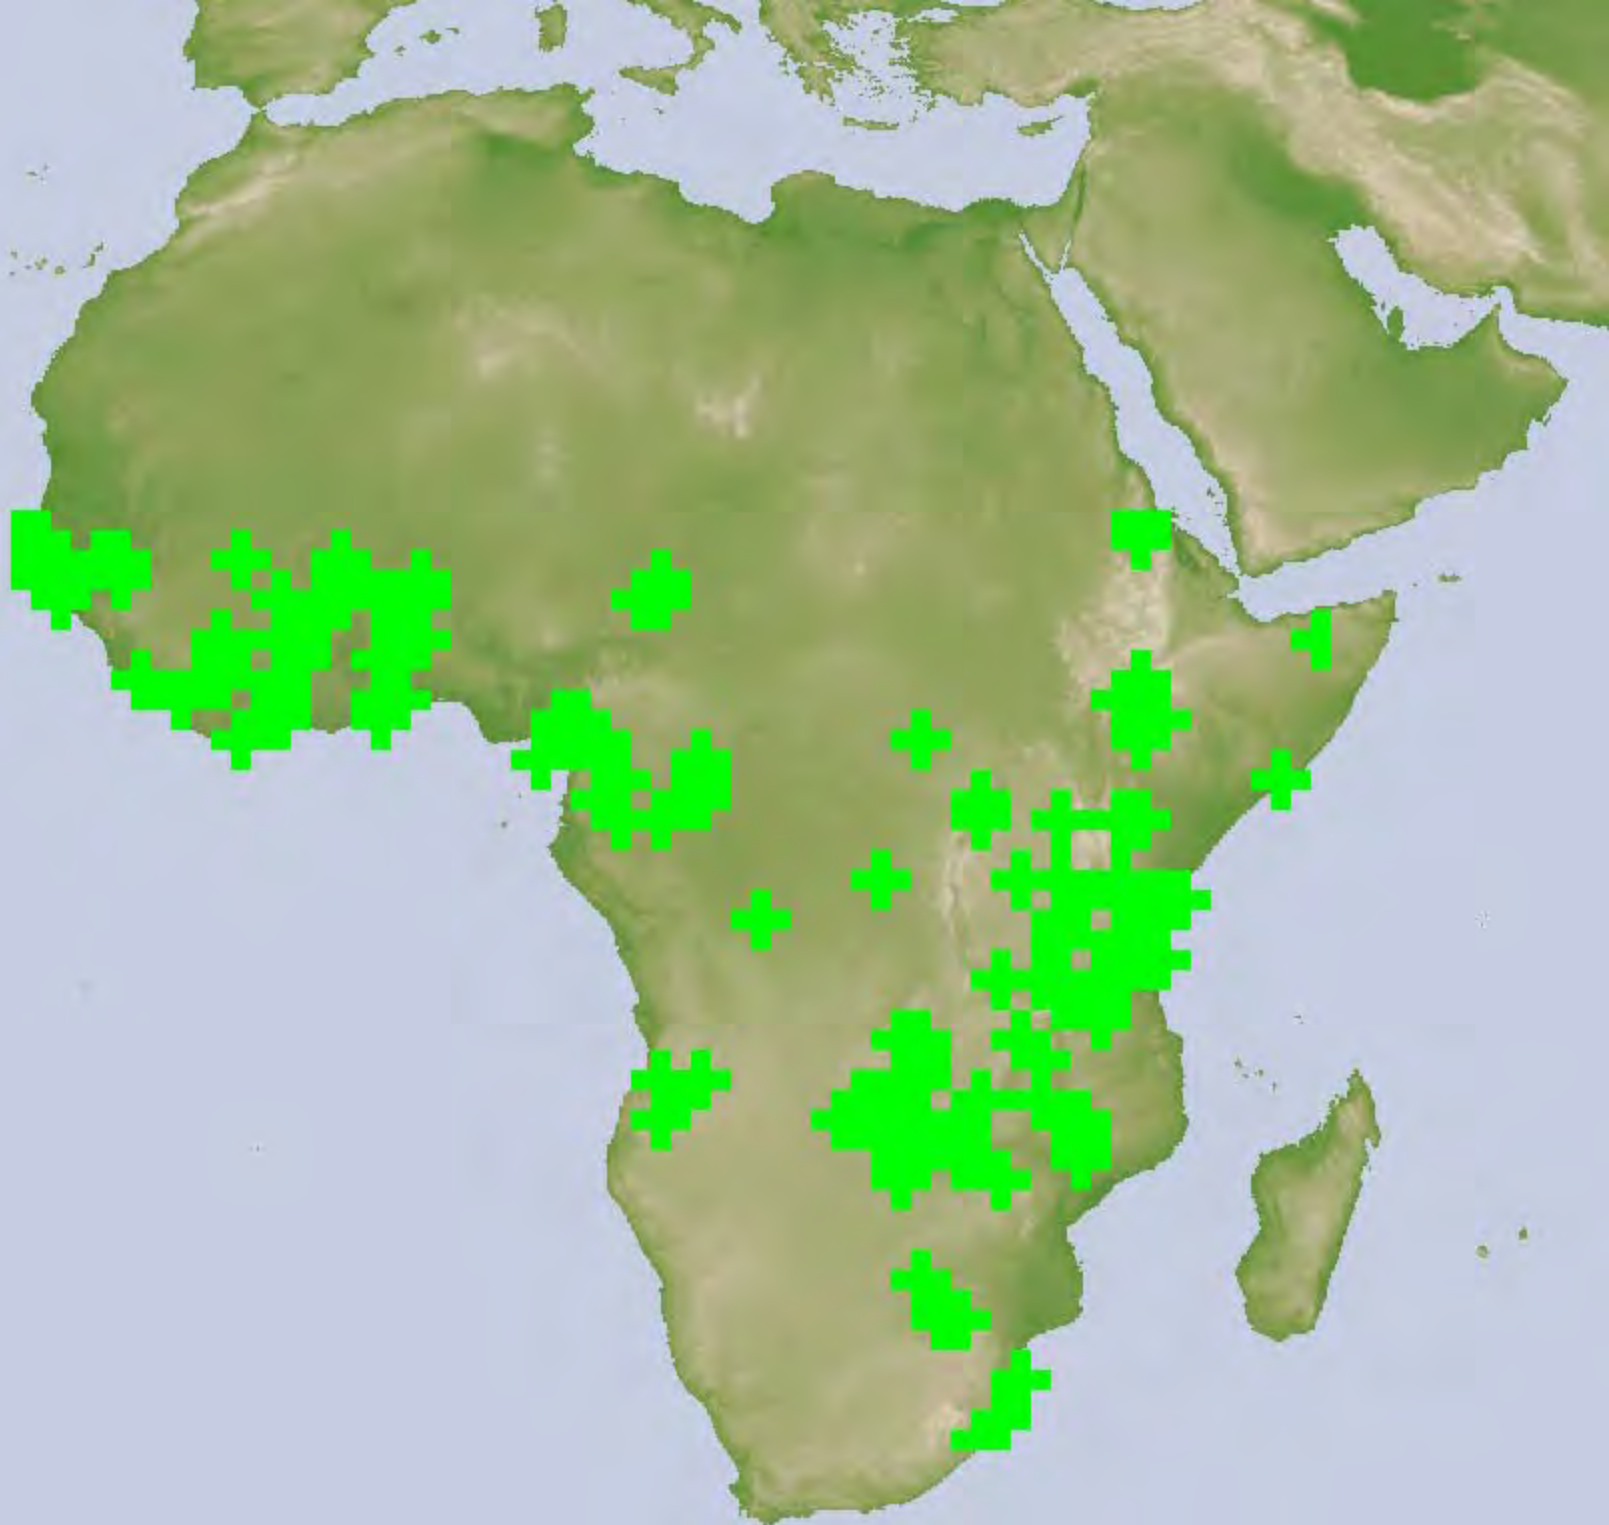



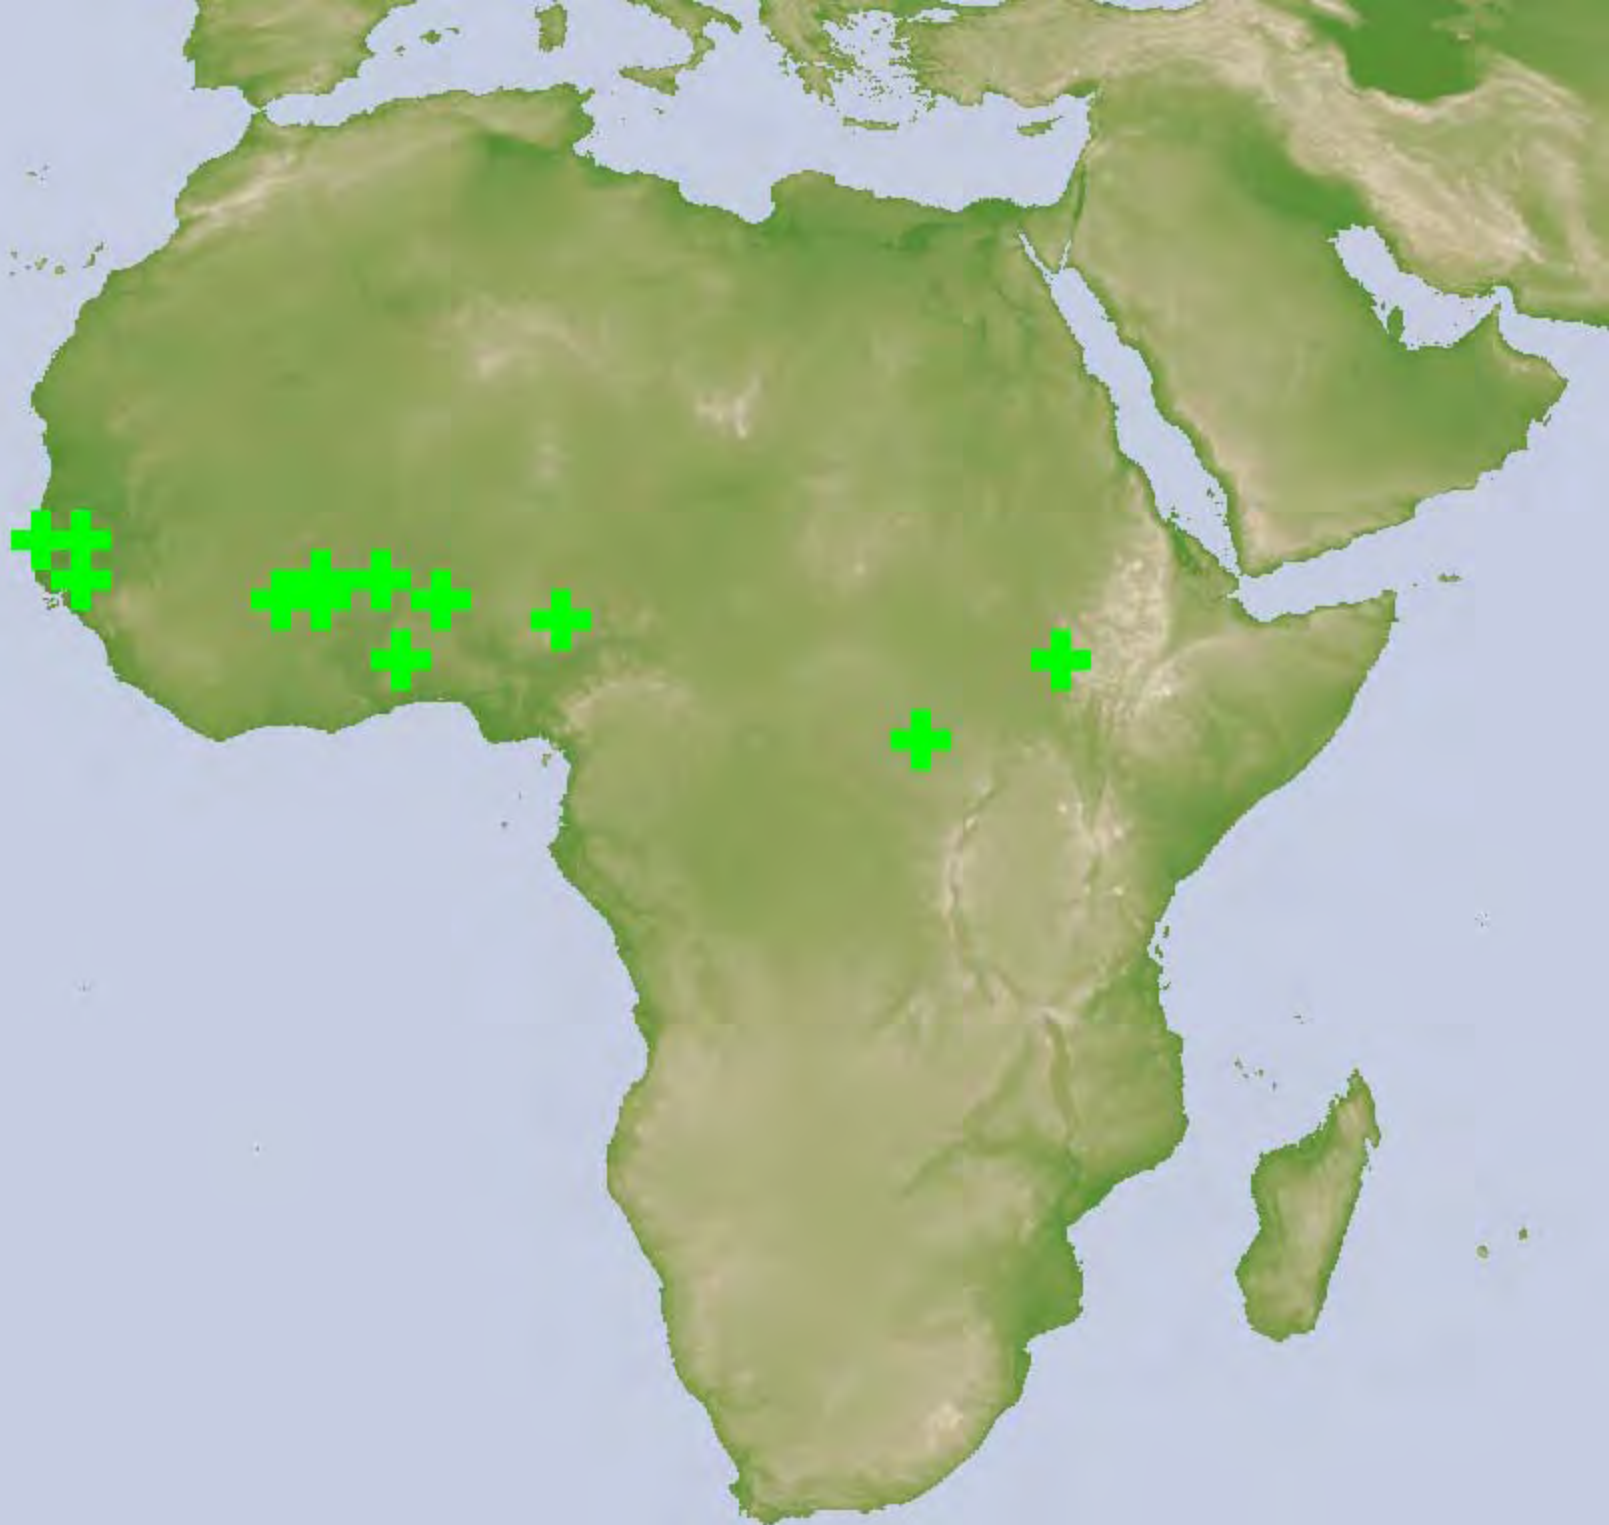



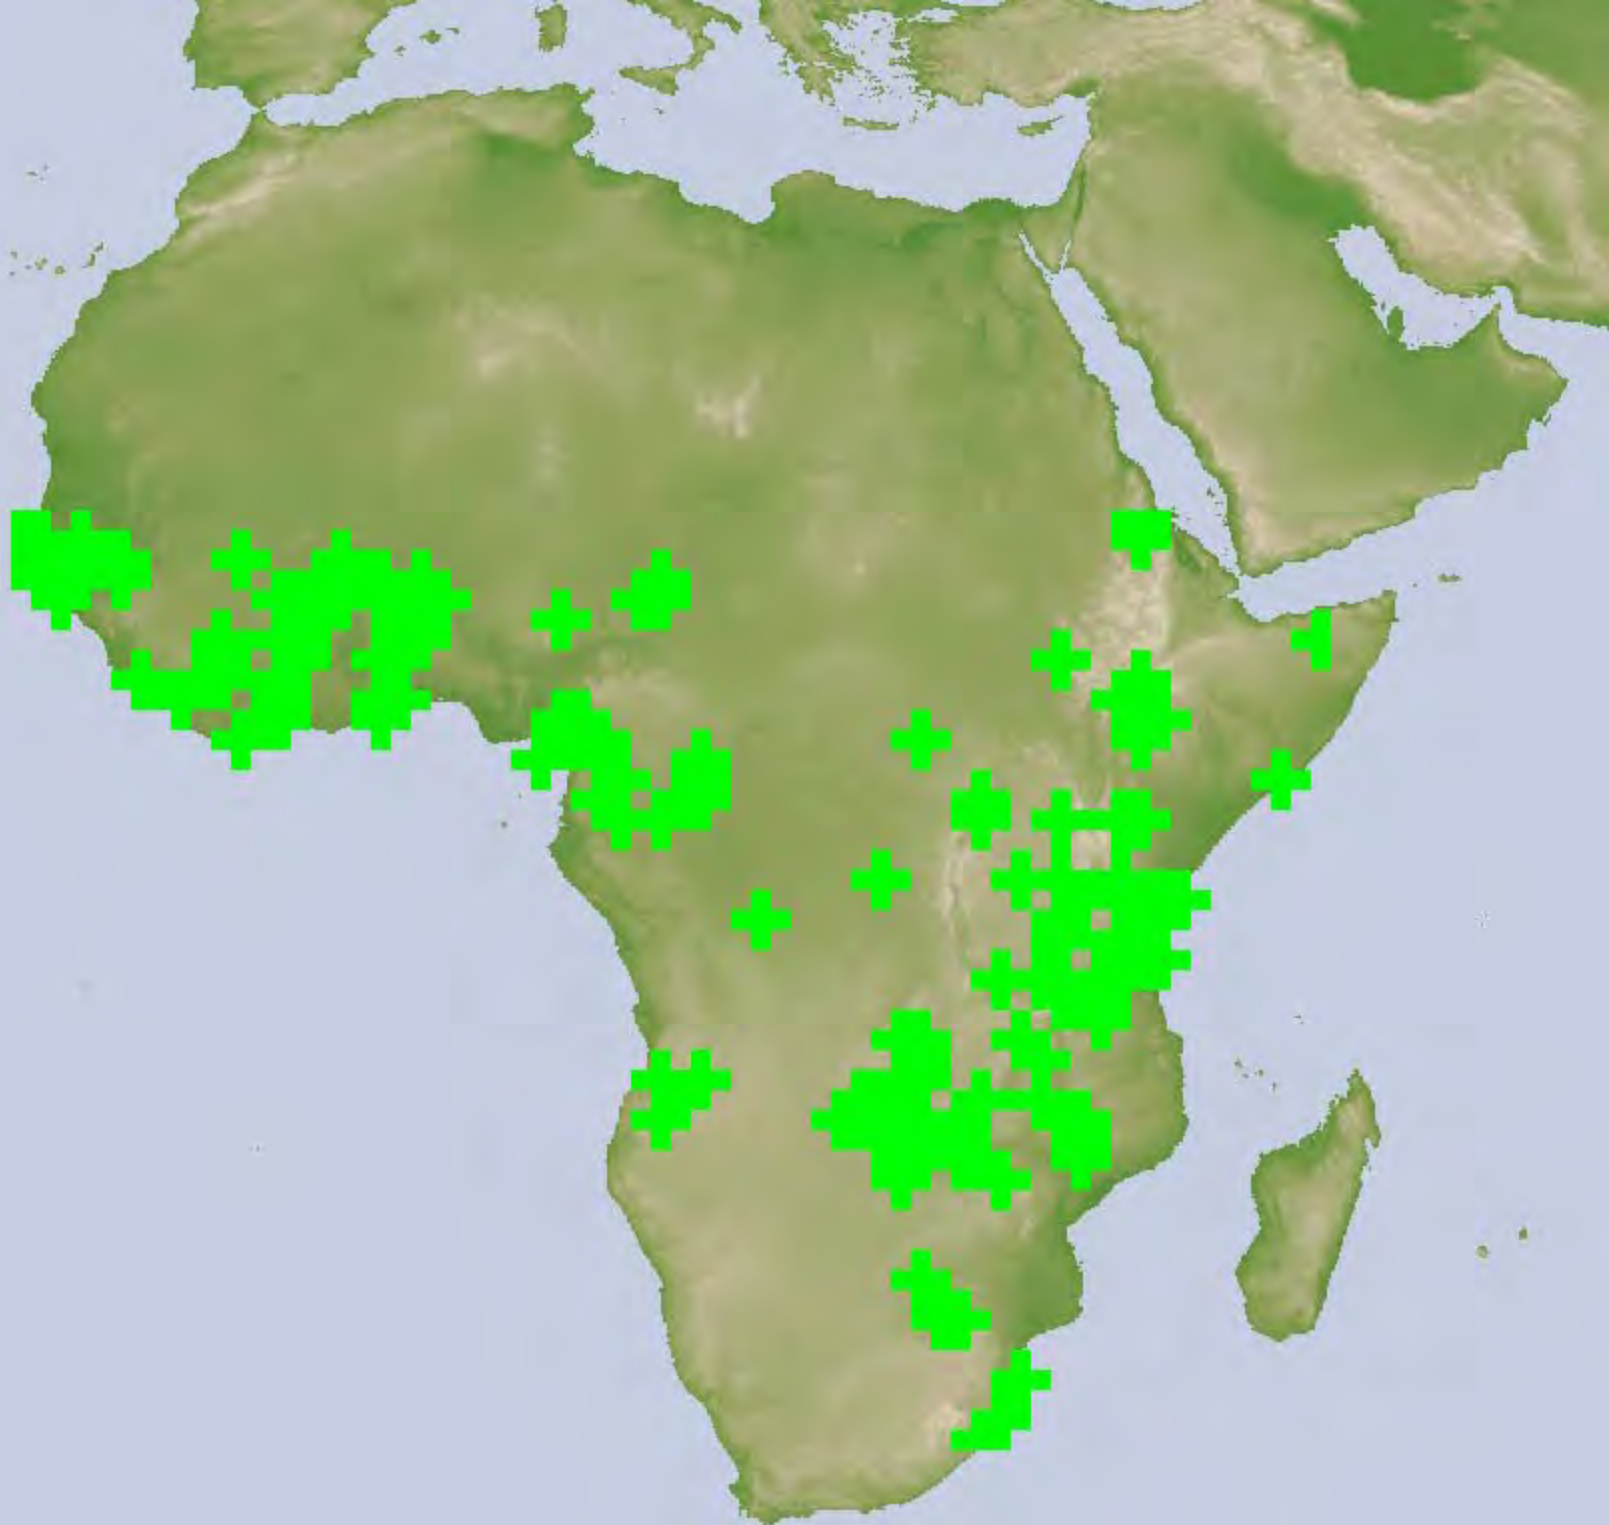

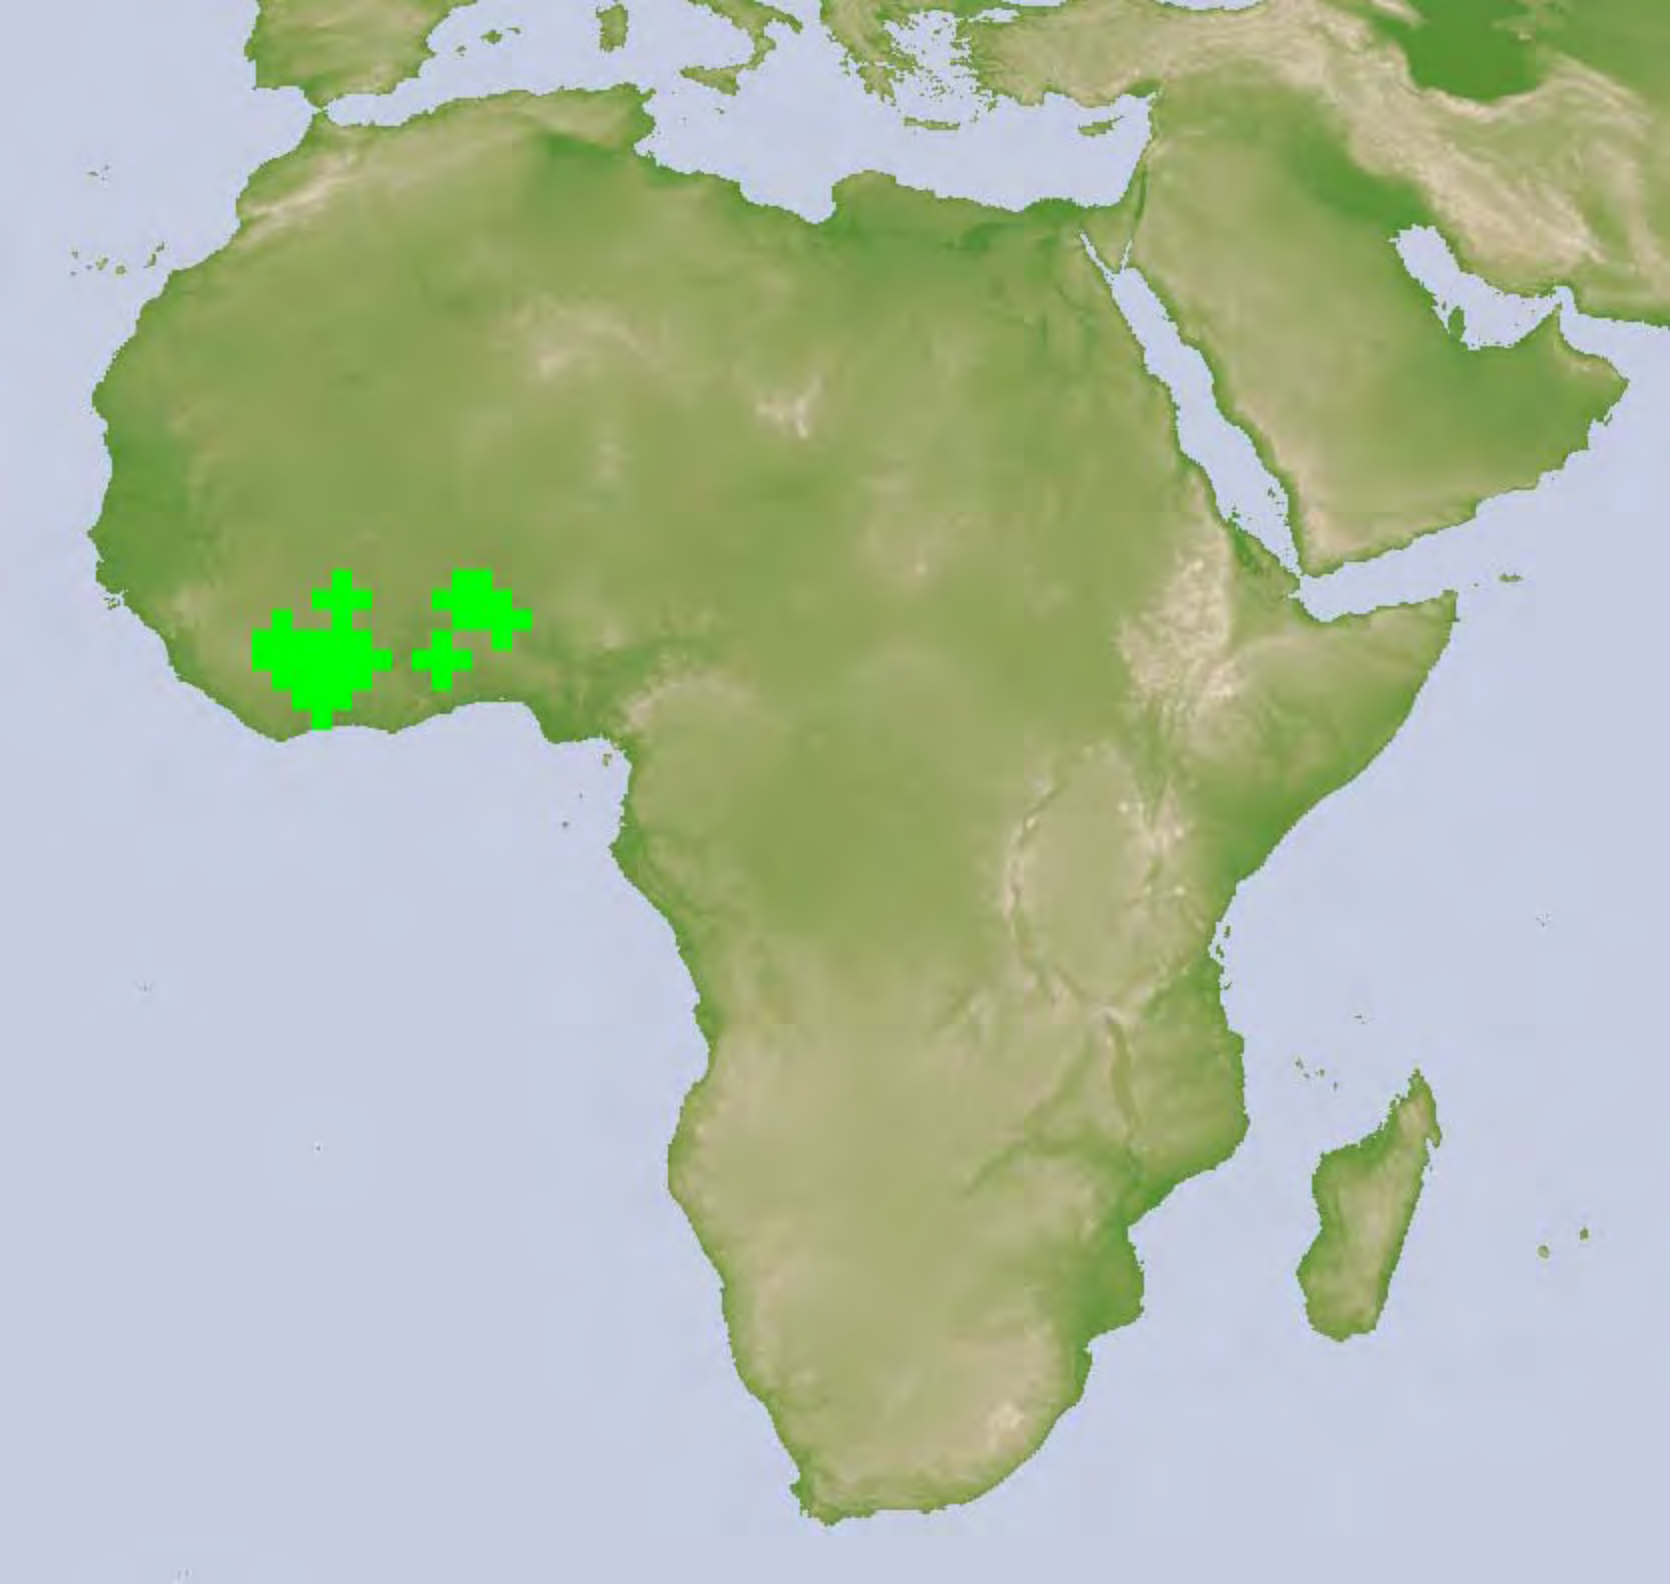

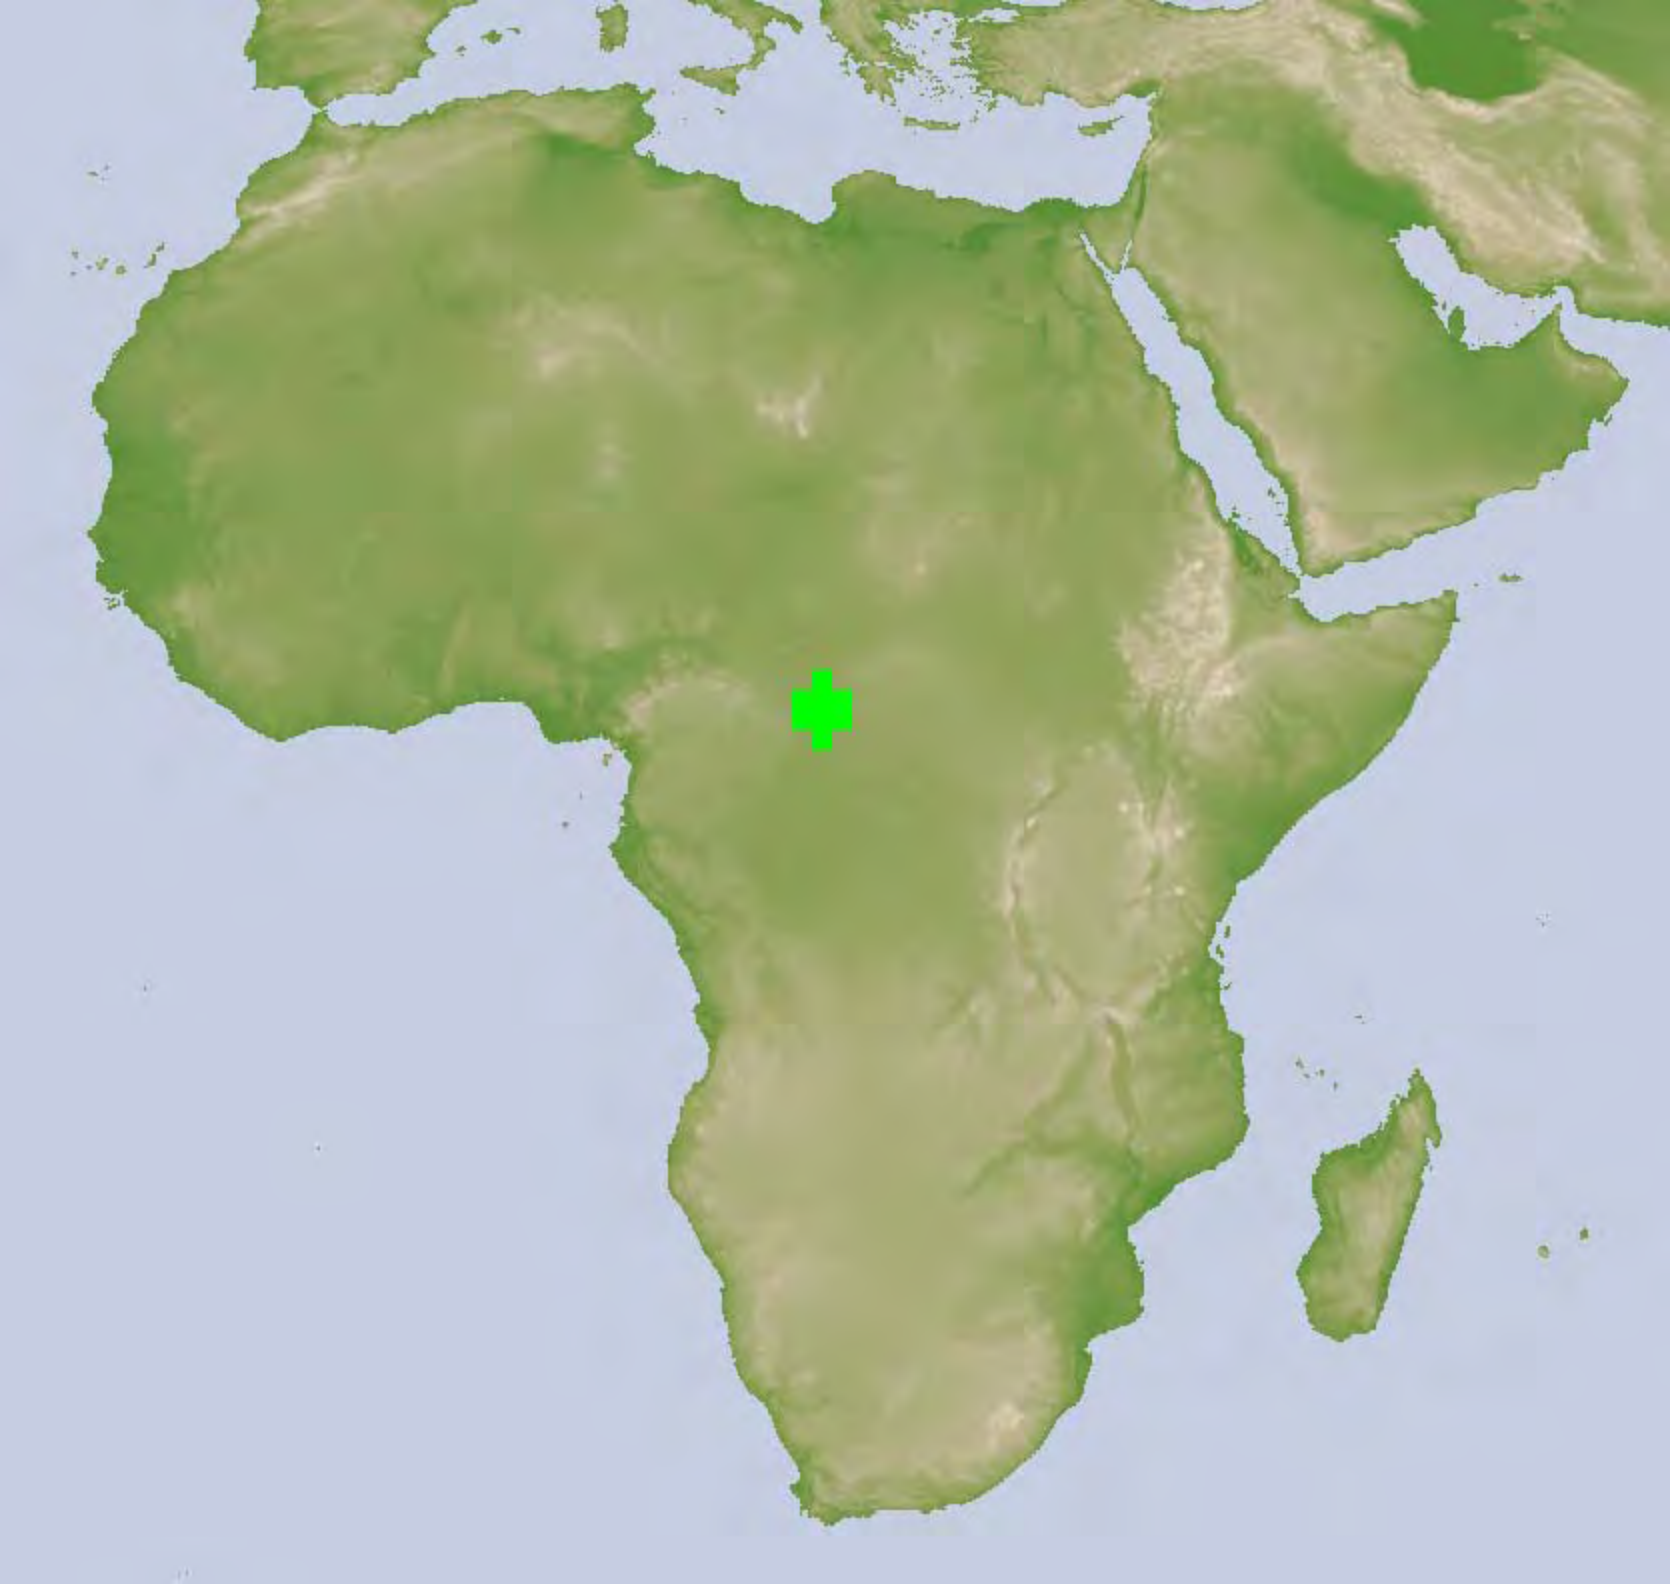



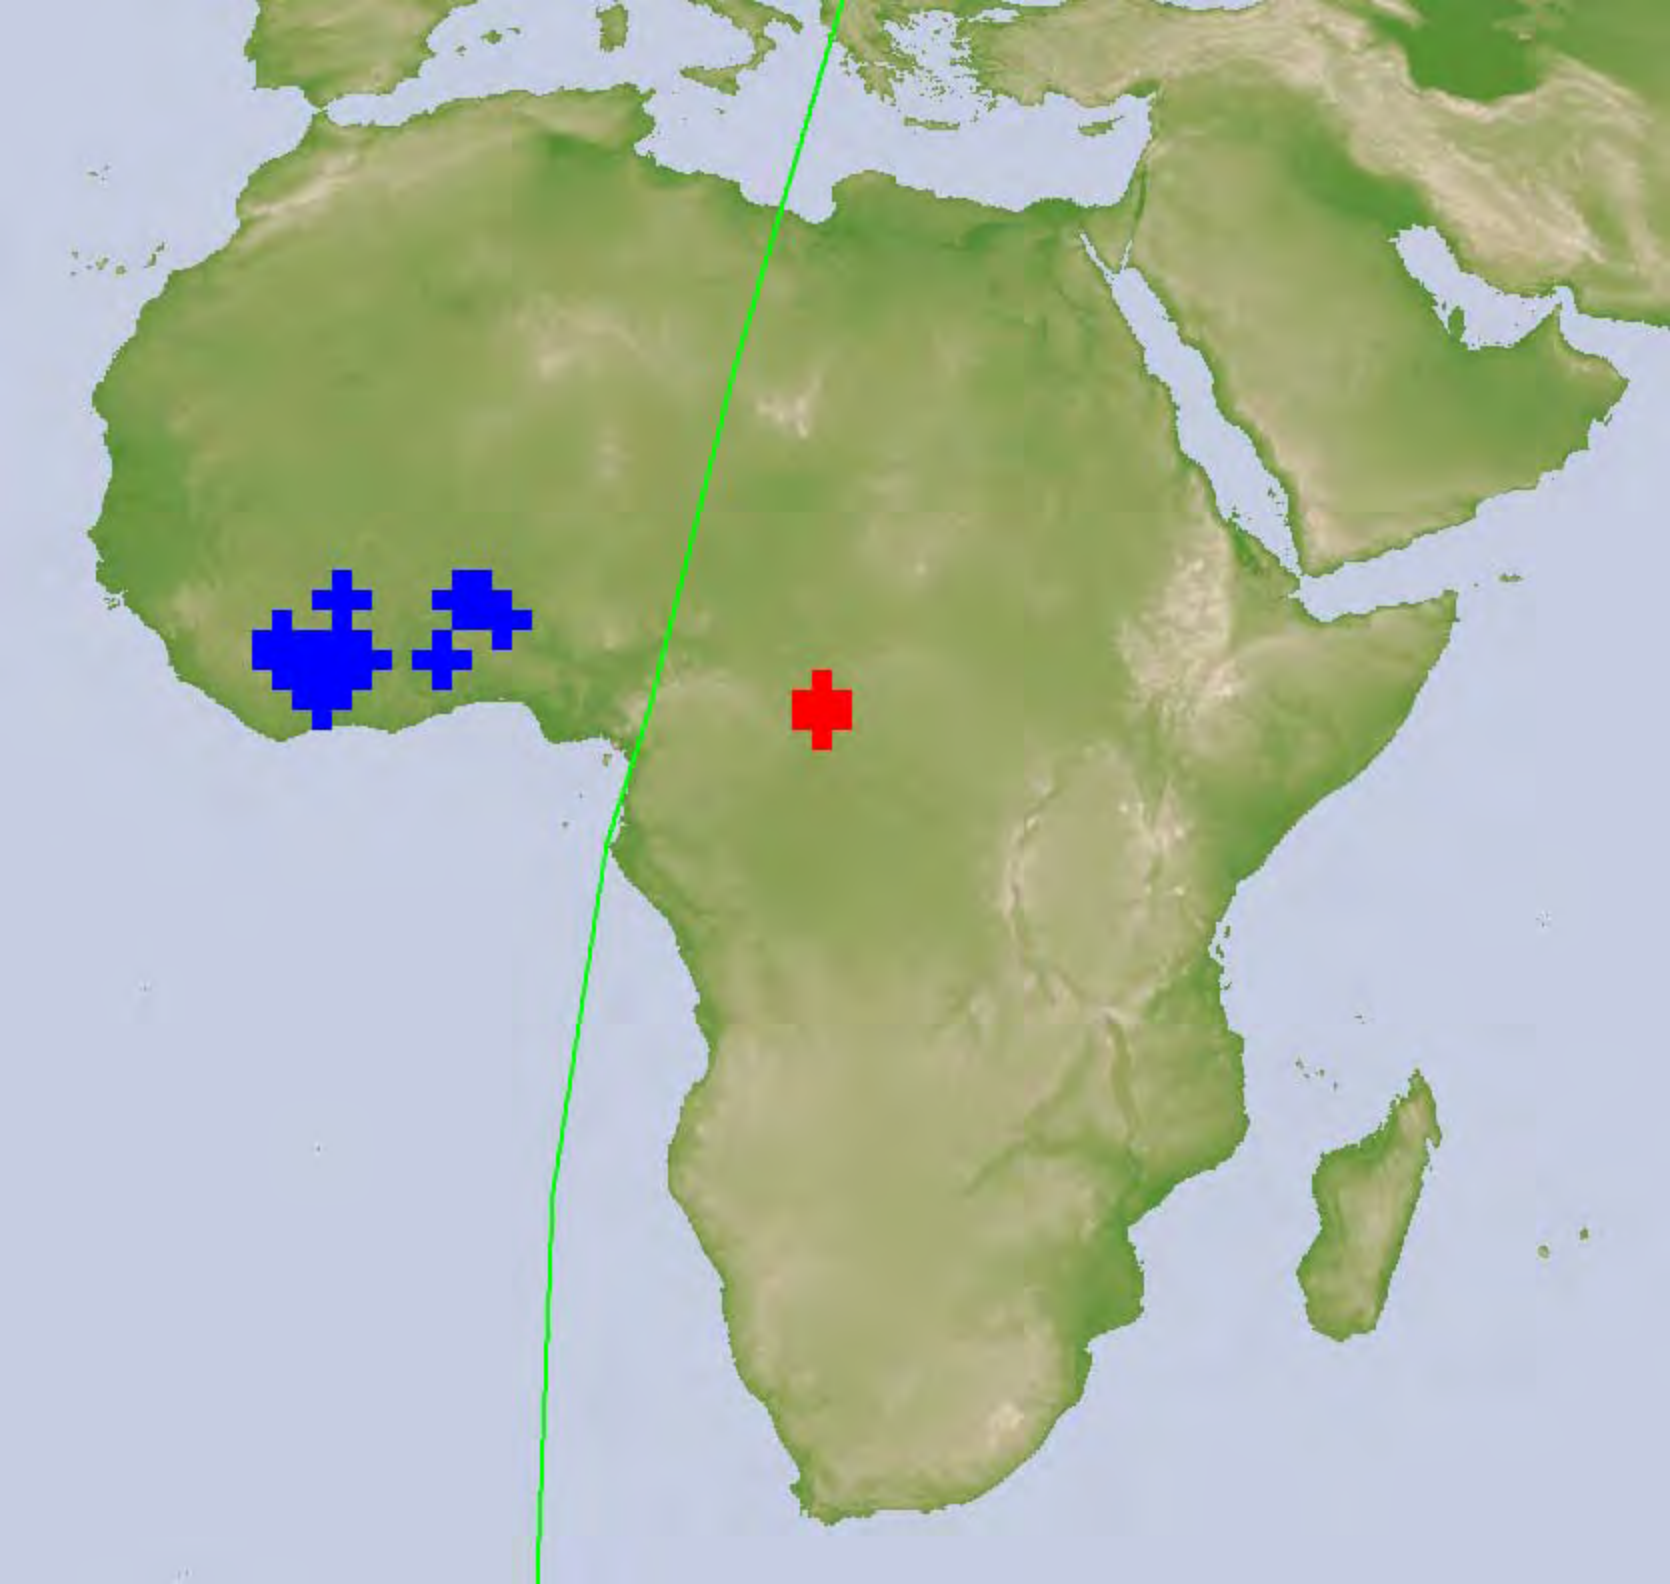



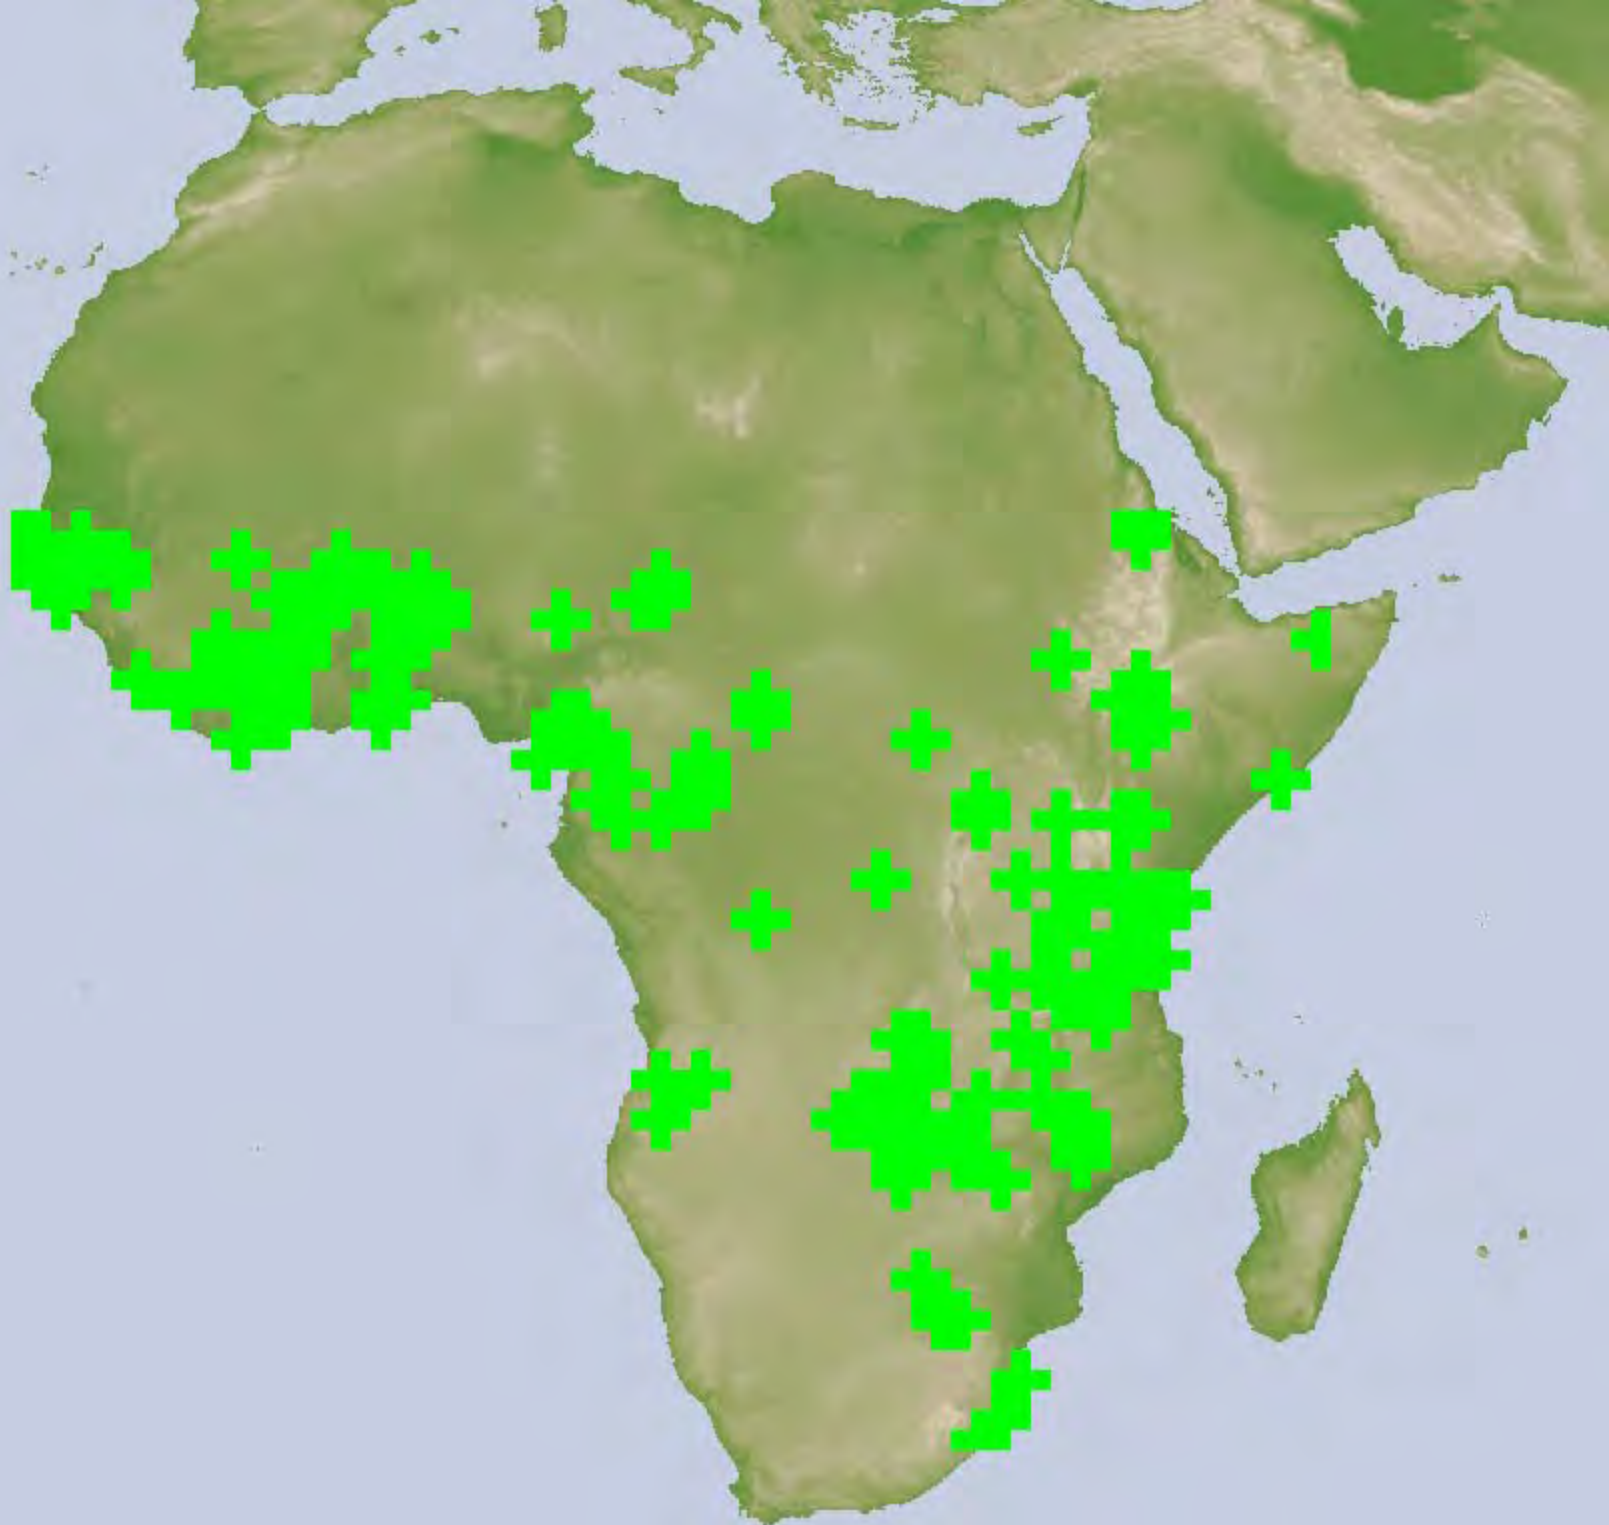

# Consensus reconstruction

|                           |                        |
|---------------------------|------------------------|
| node_1 [pseudoliberianus] | node_27 [naevius]      |
| node_2 [liberianus]       | node_28                |
| node_3 [macroliberianus]  | node_29 [zambesianus]  |
| node_4                    | node_30                |
| node_5                    | node_31                |
| node_6 [rufopygus]        | node_32 [delahayei]    |
| node_7 [jossoui]          | node_33                |
| node_8 [saadaniensis]     | node_34 [katangensis]  |
| node_9                    | node_35                |
| node_10                   | node_36 [pendjarius]   |
| node_11                   | node_37                |
| node_12 [schaufussi]      | node_38 [rougonorum]   |
| node_13 [rolandoi]        | node_39 [curtipilis]   |
| node_14                   | node_40                |
| node_15 [zavattarii]      | node_41 [flexicornis]  |
| node_16                   | node_42                |
| node_17 [angolensis]      | node_43 [viridiaereus] |
| node_18                   | node_44                |
| node_19 [rufostillans]    | node_45                |
| node_20                   | node_46 [chrysoderus]  |
| node_21 [aequatus]        | node_47                |
| node_22                   | node_48 [lamtoensis]   |
| node_23                   | node_49 [hemichlorus]  |
| node_24 [rufobasalis]     | node_50                |
| node_25 [ebenus]          | node_51                |
| node_26                   |                        |























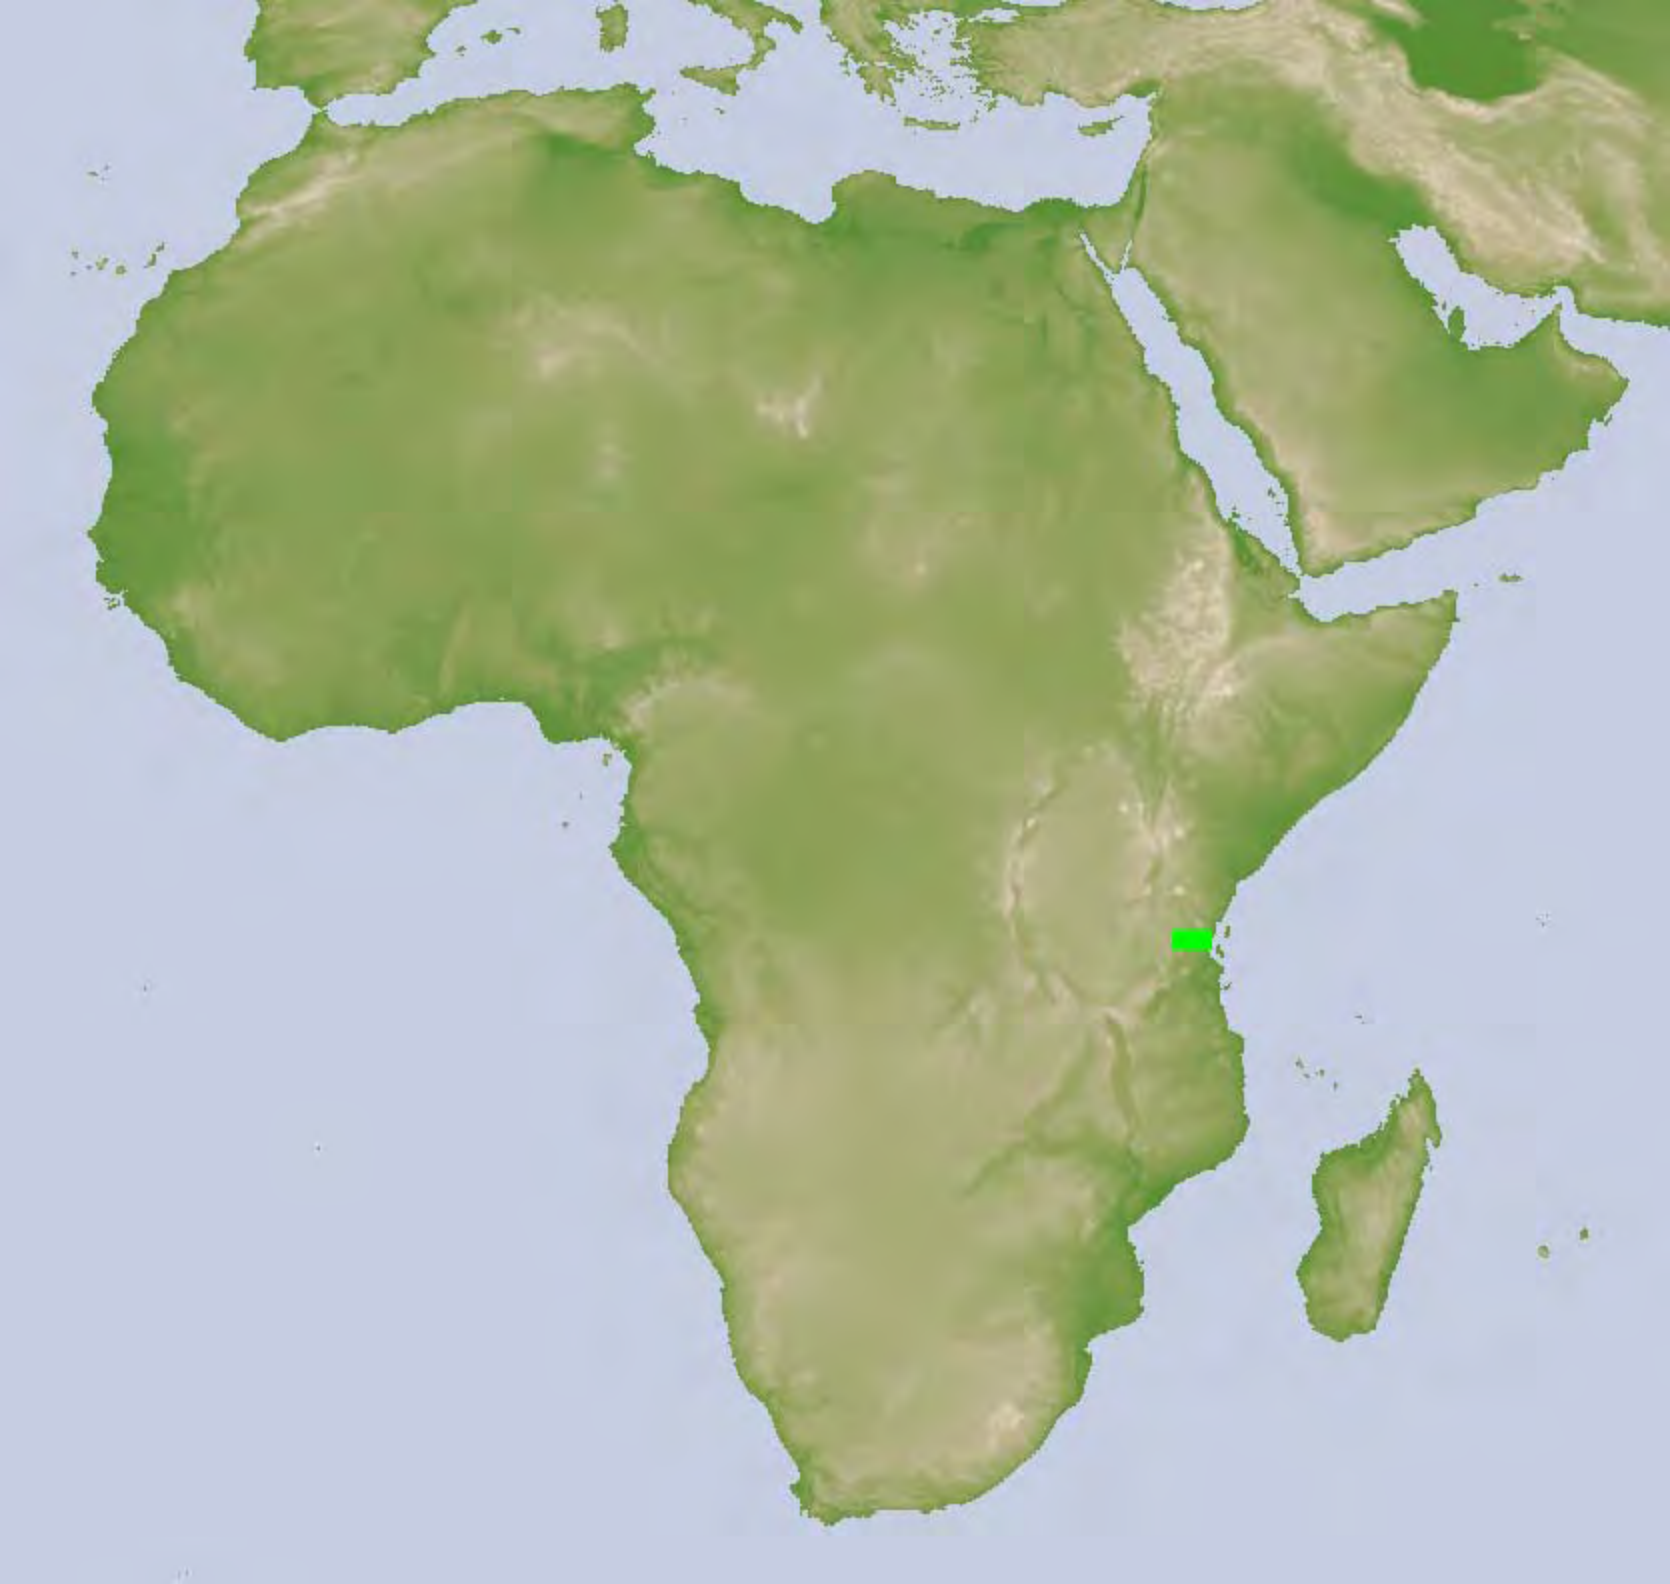

















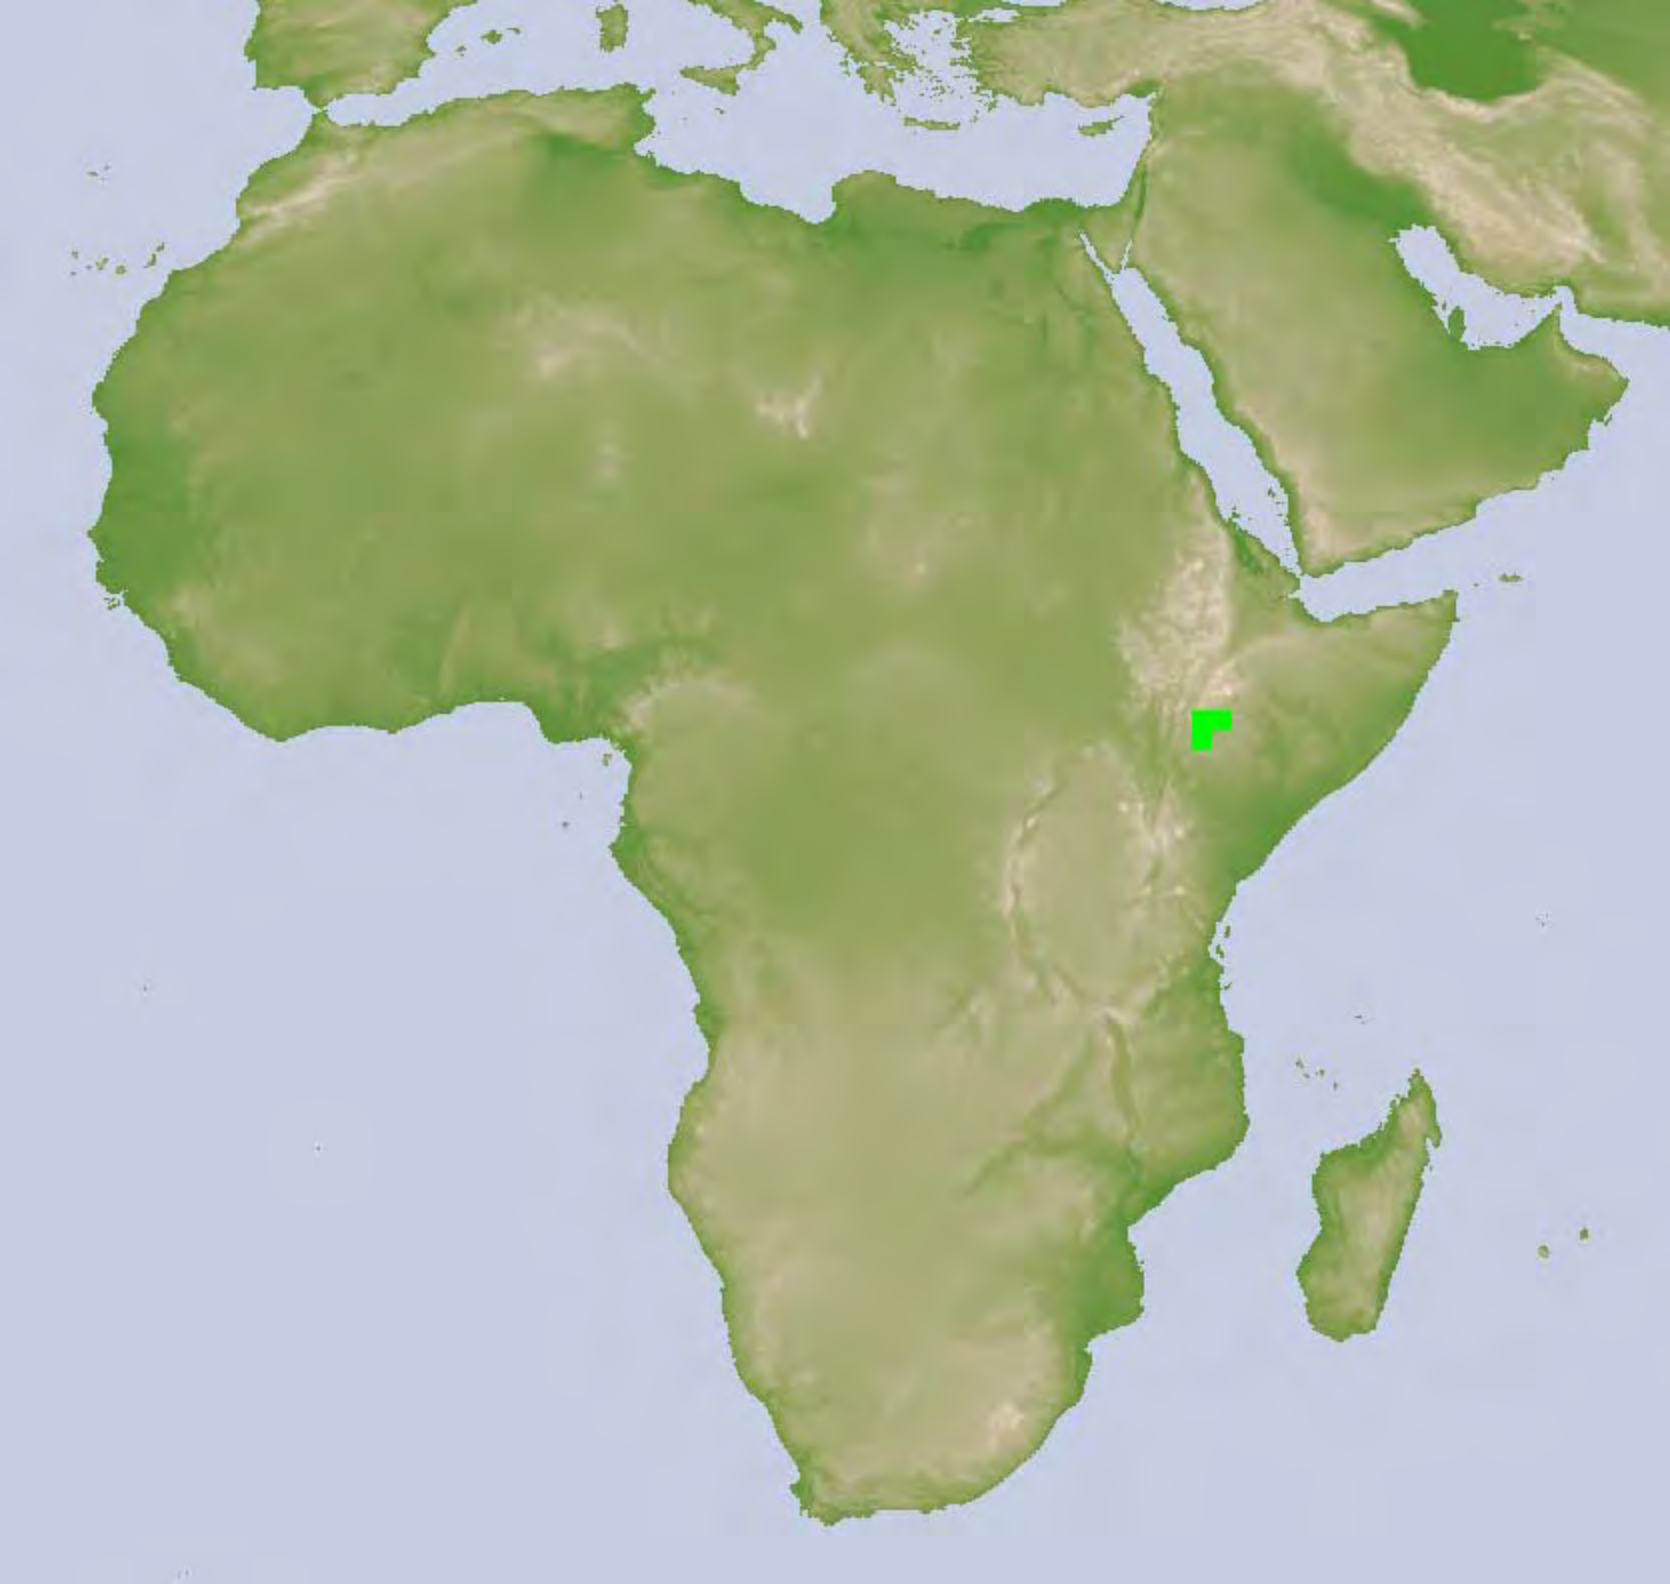



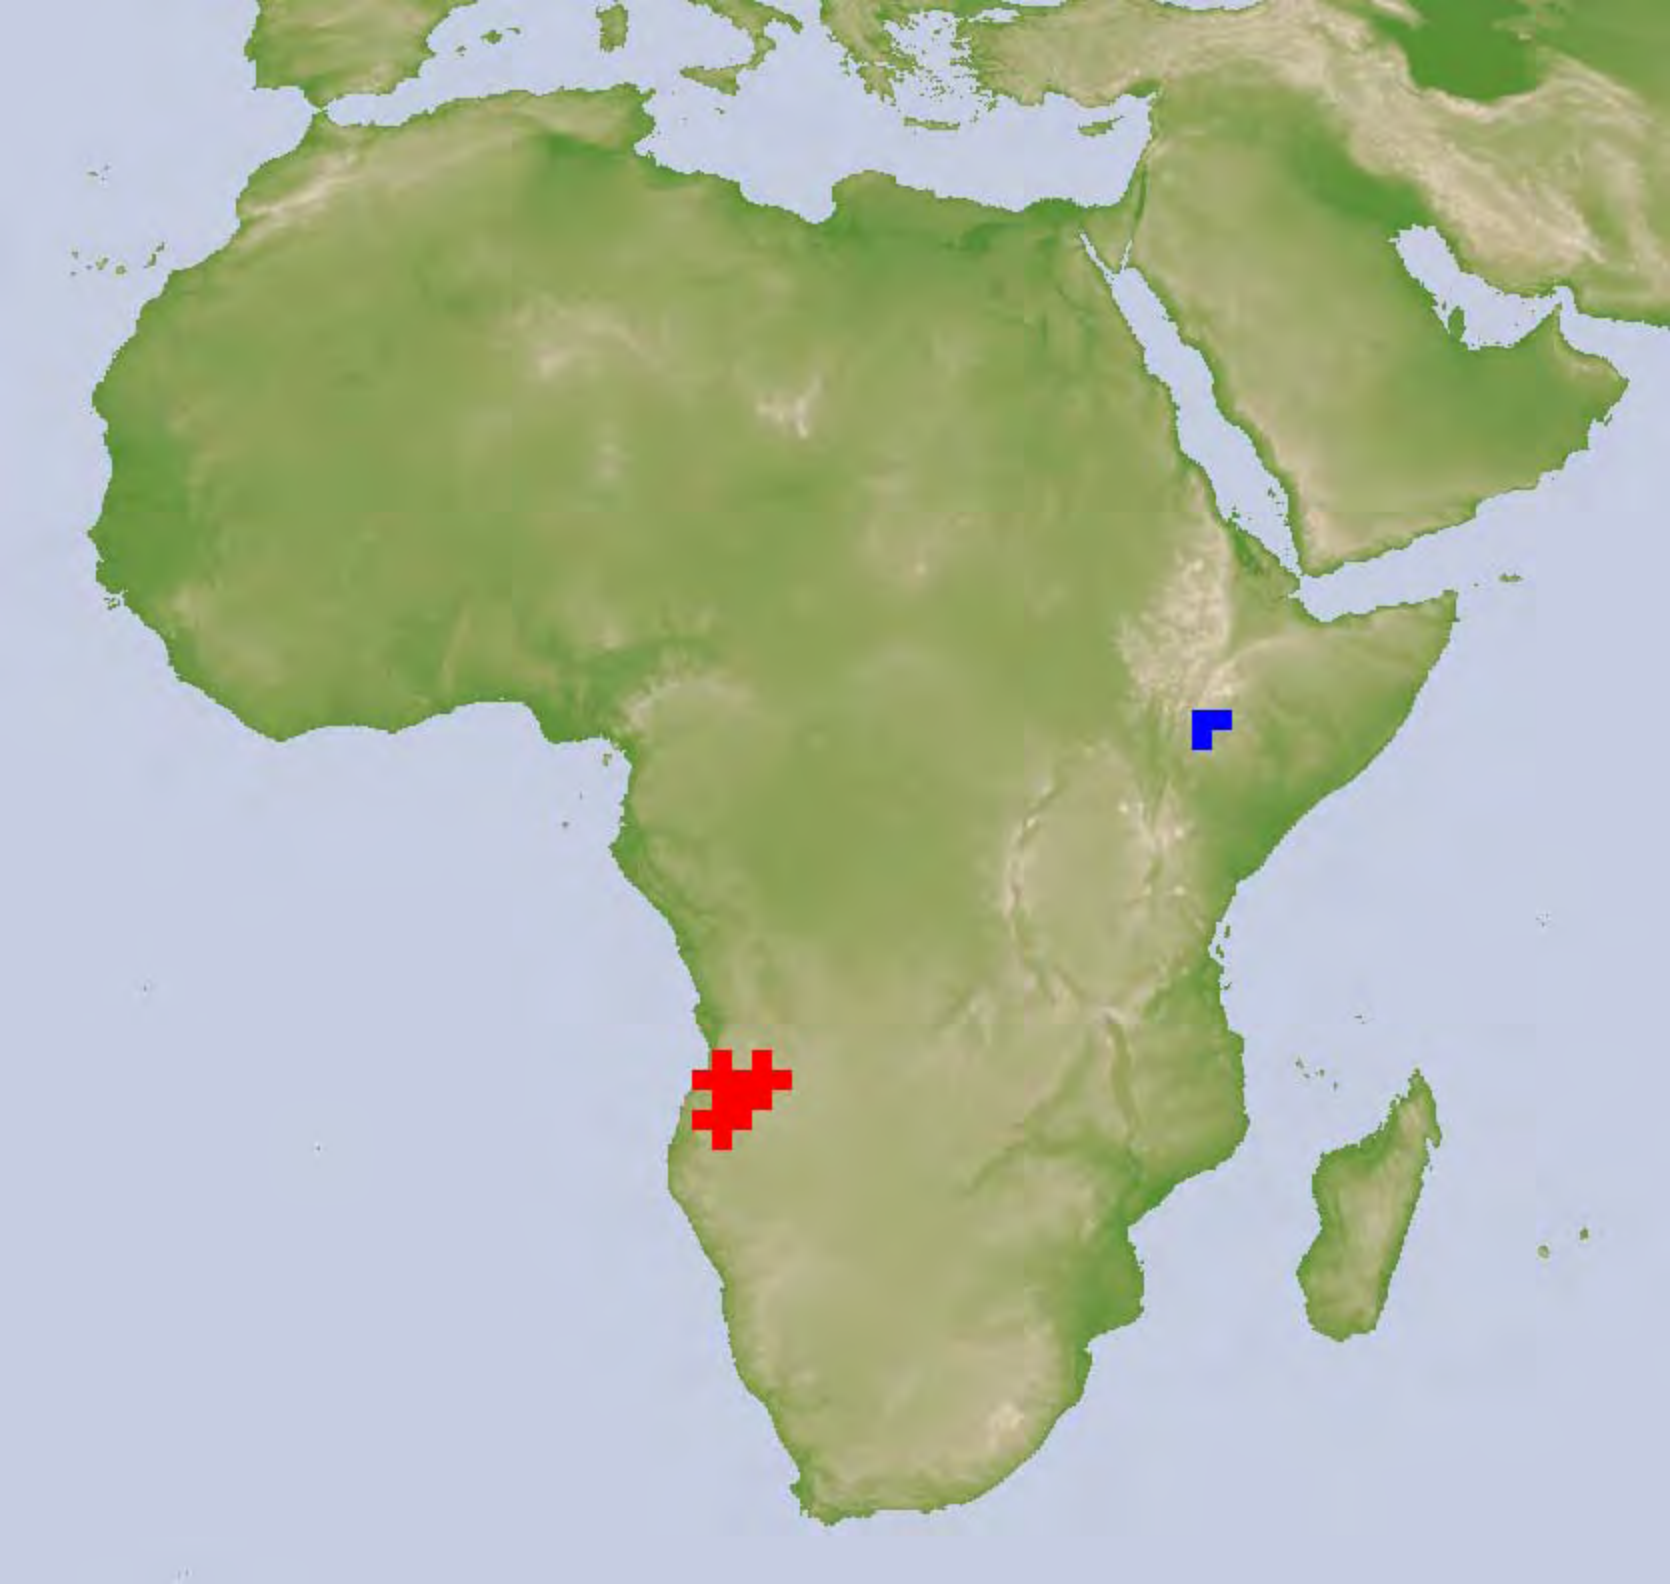





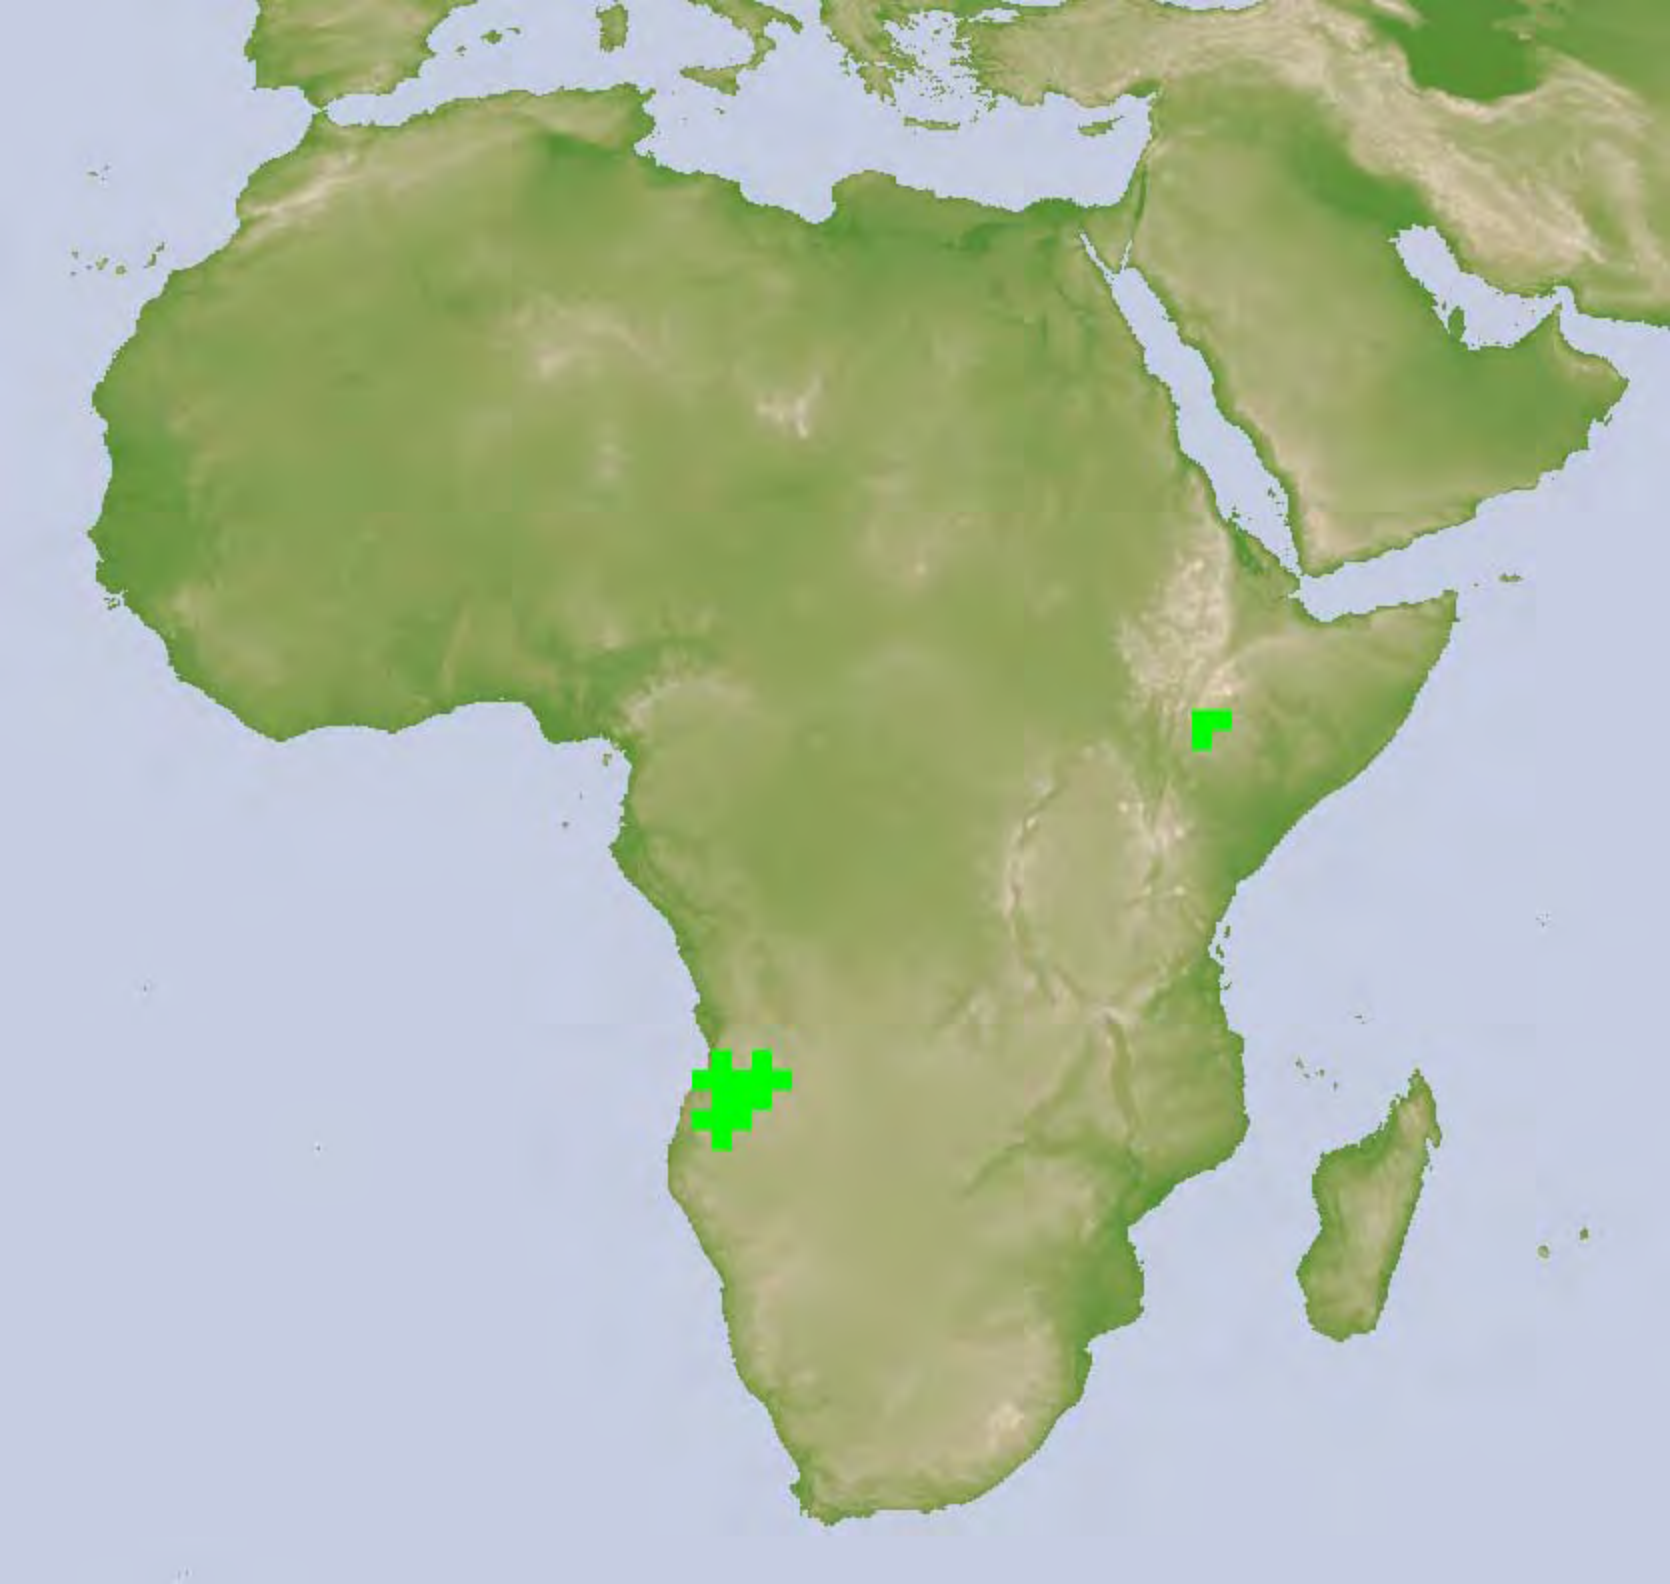



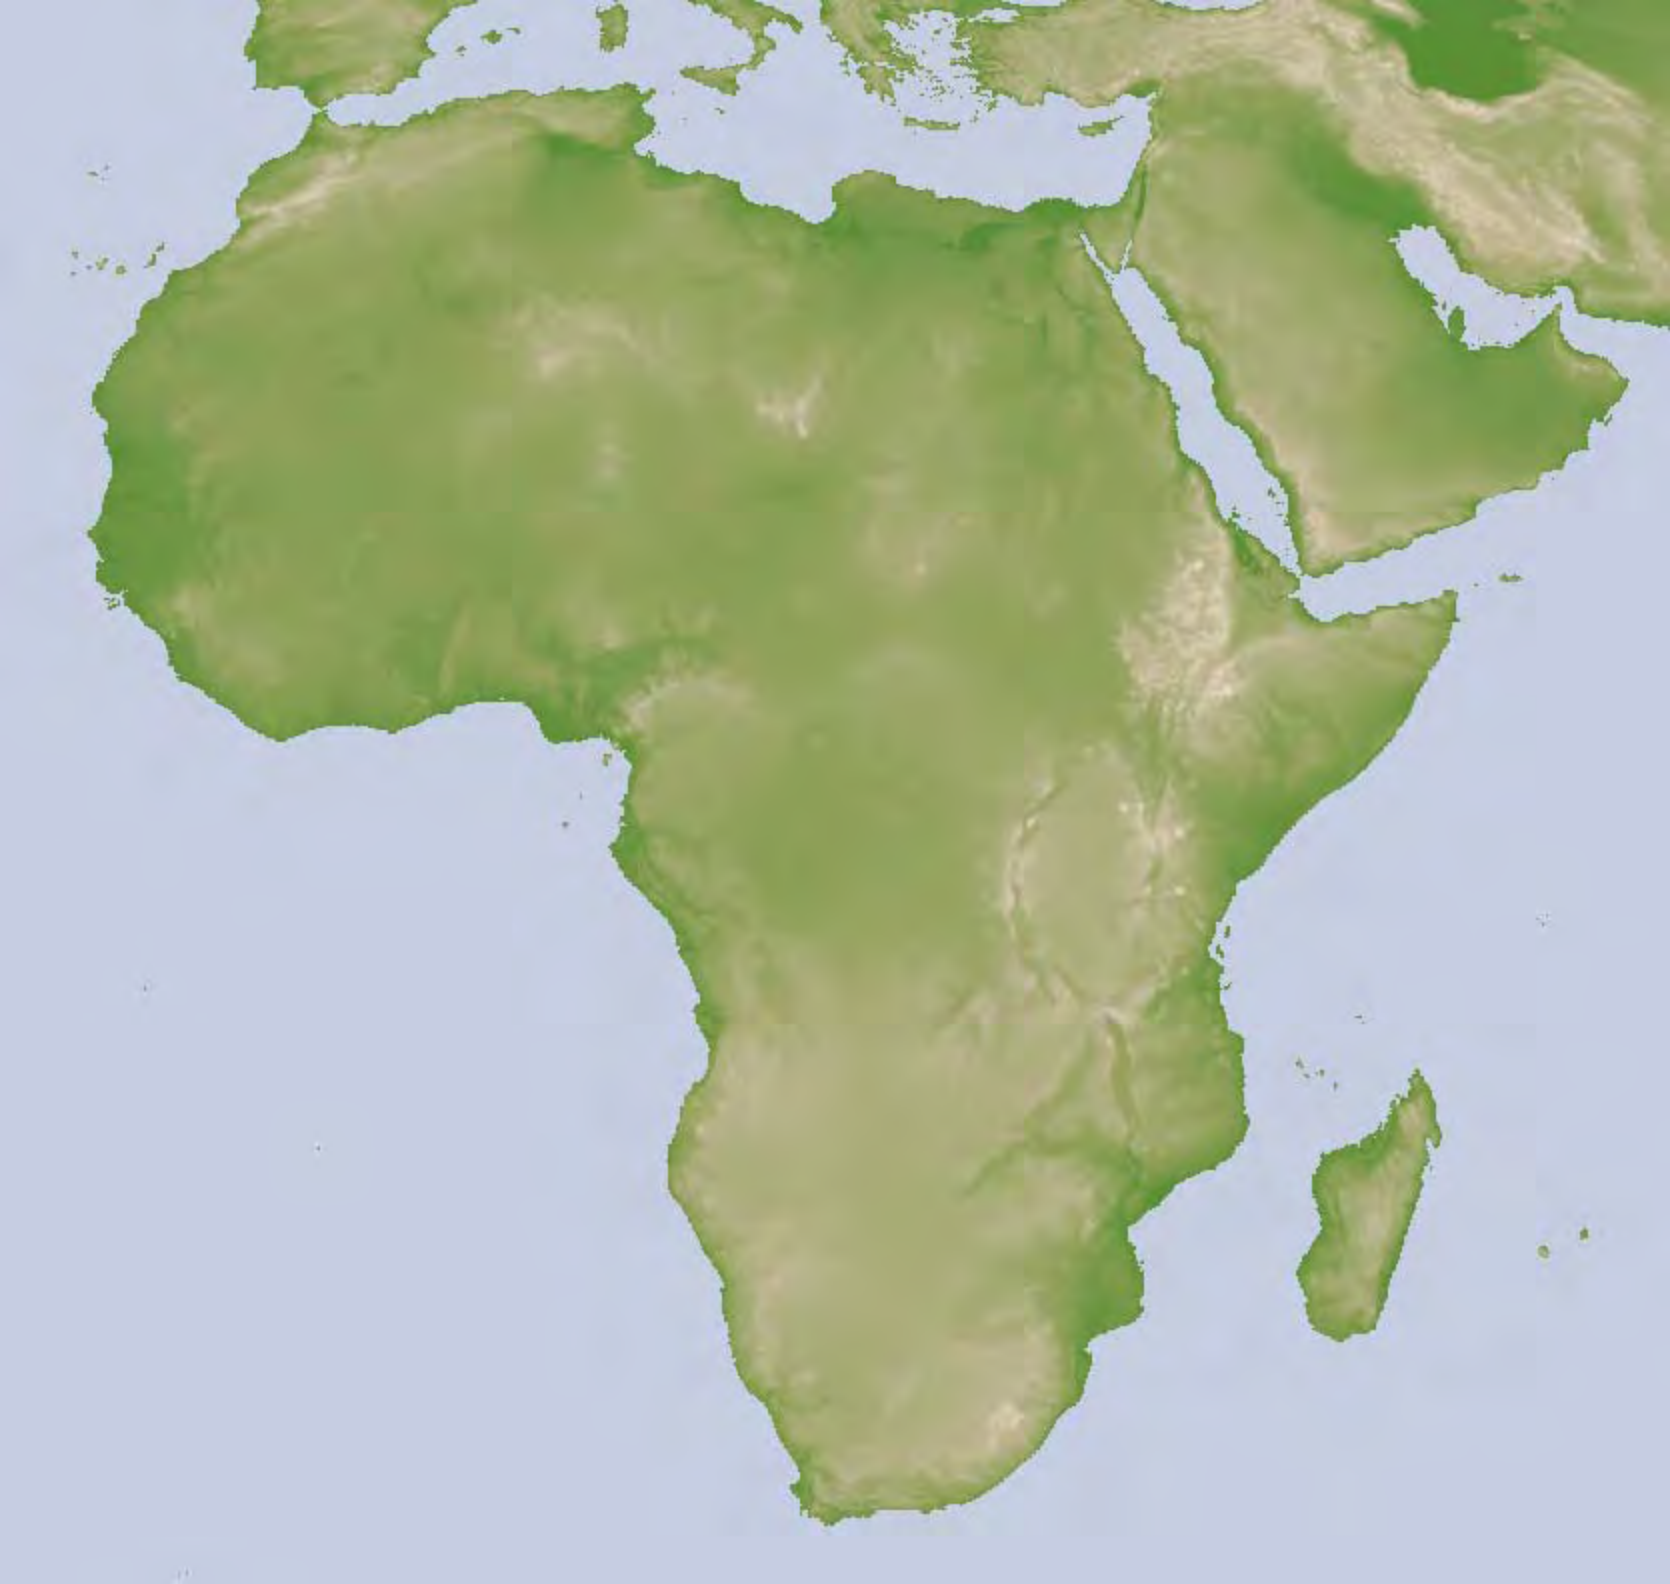



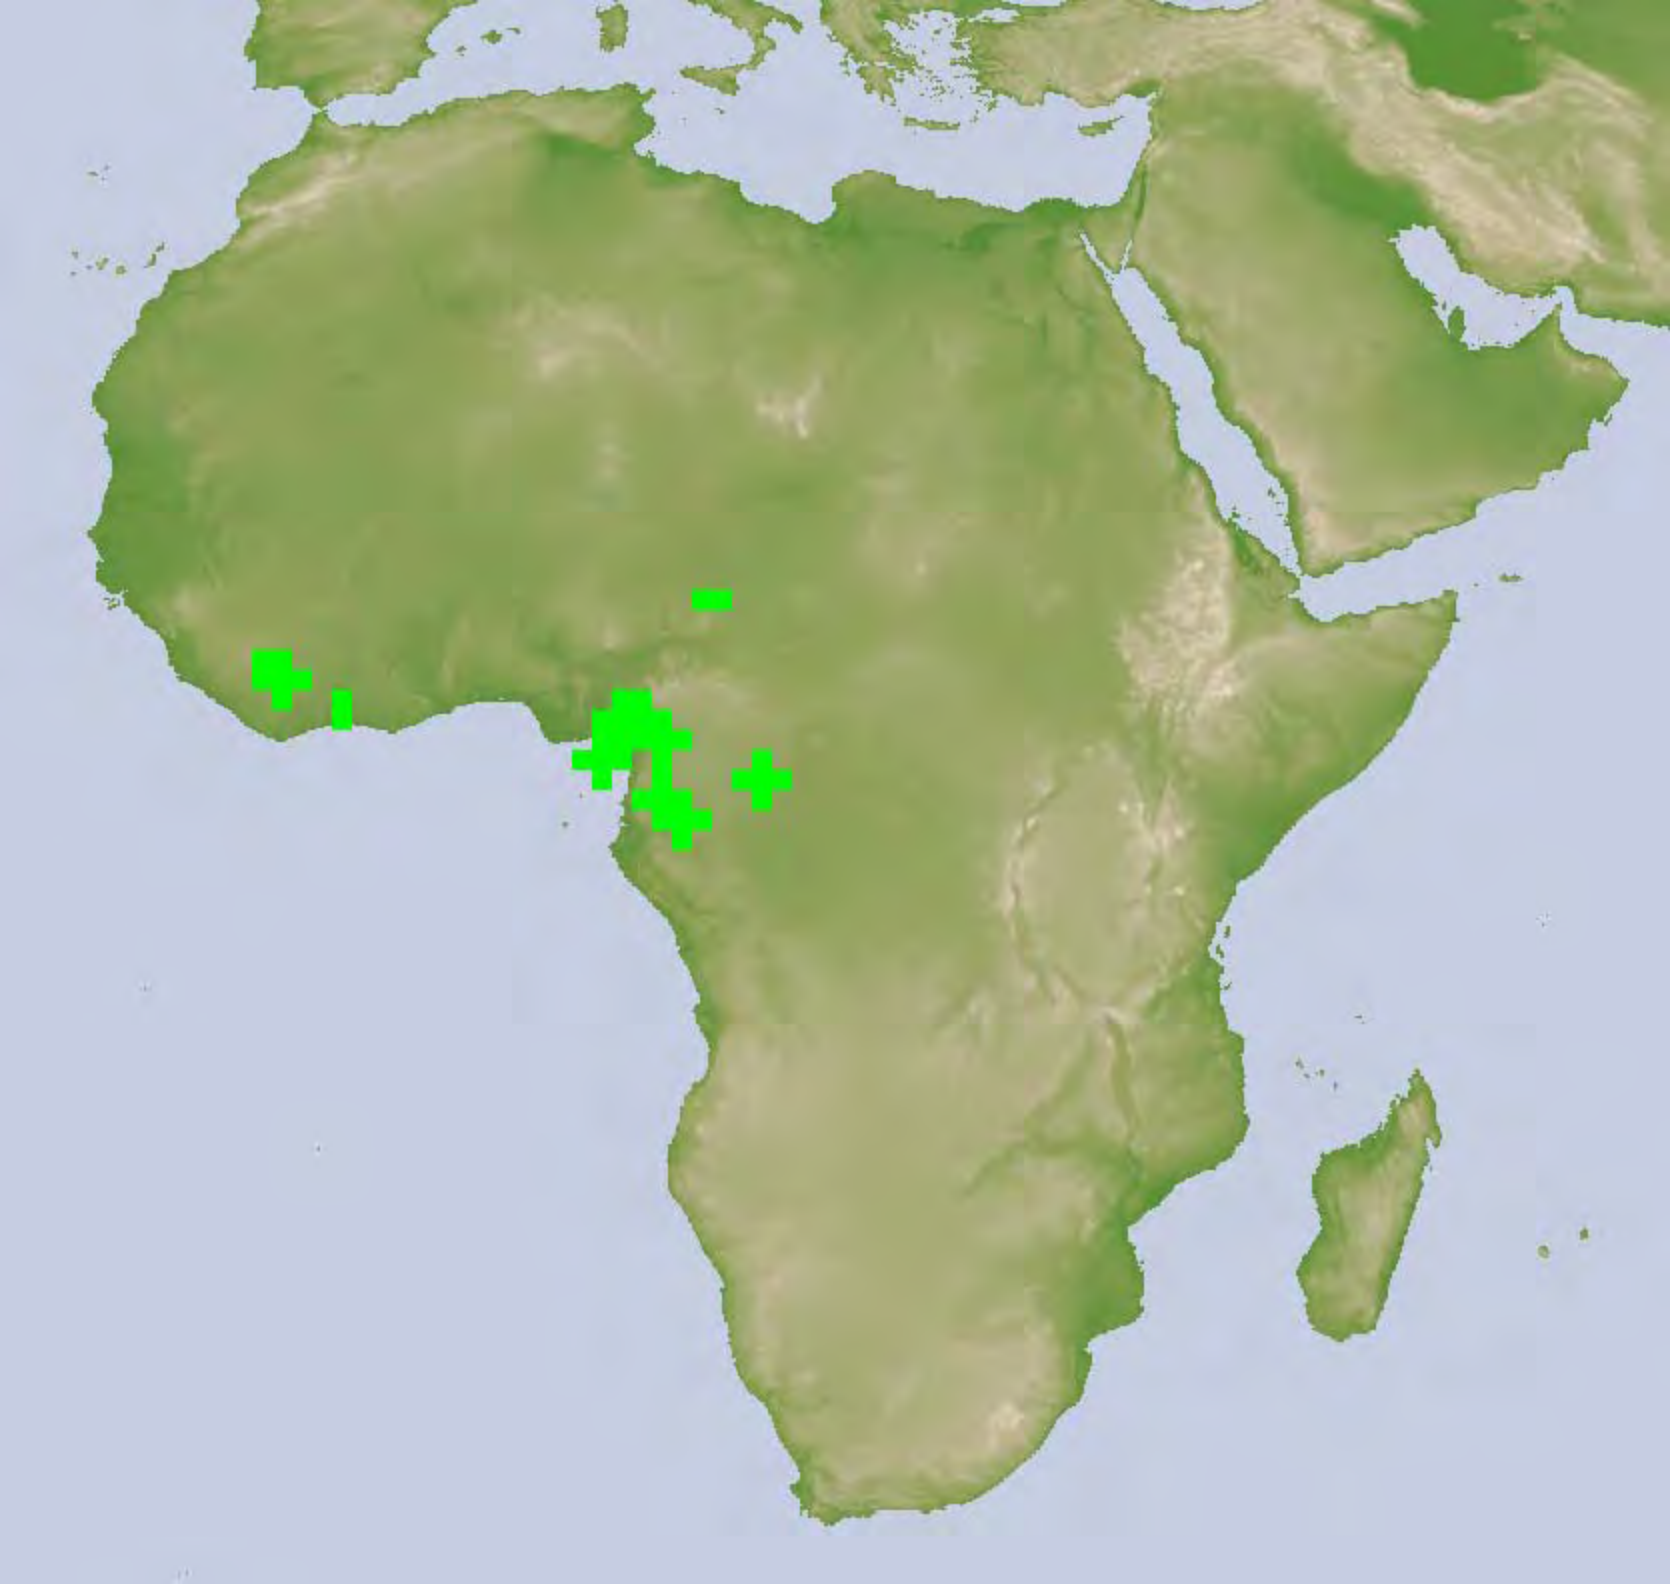





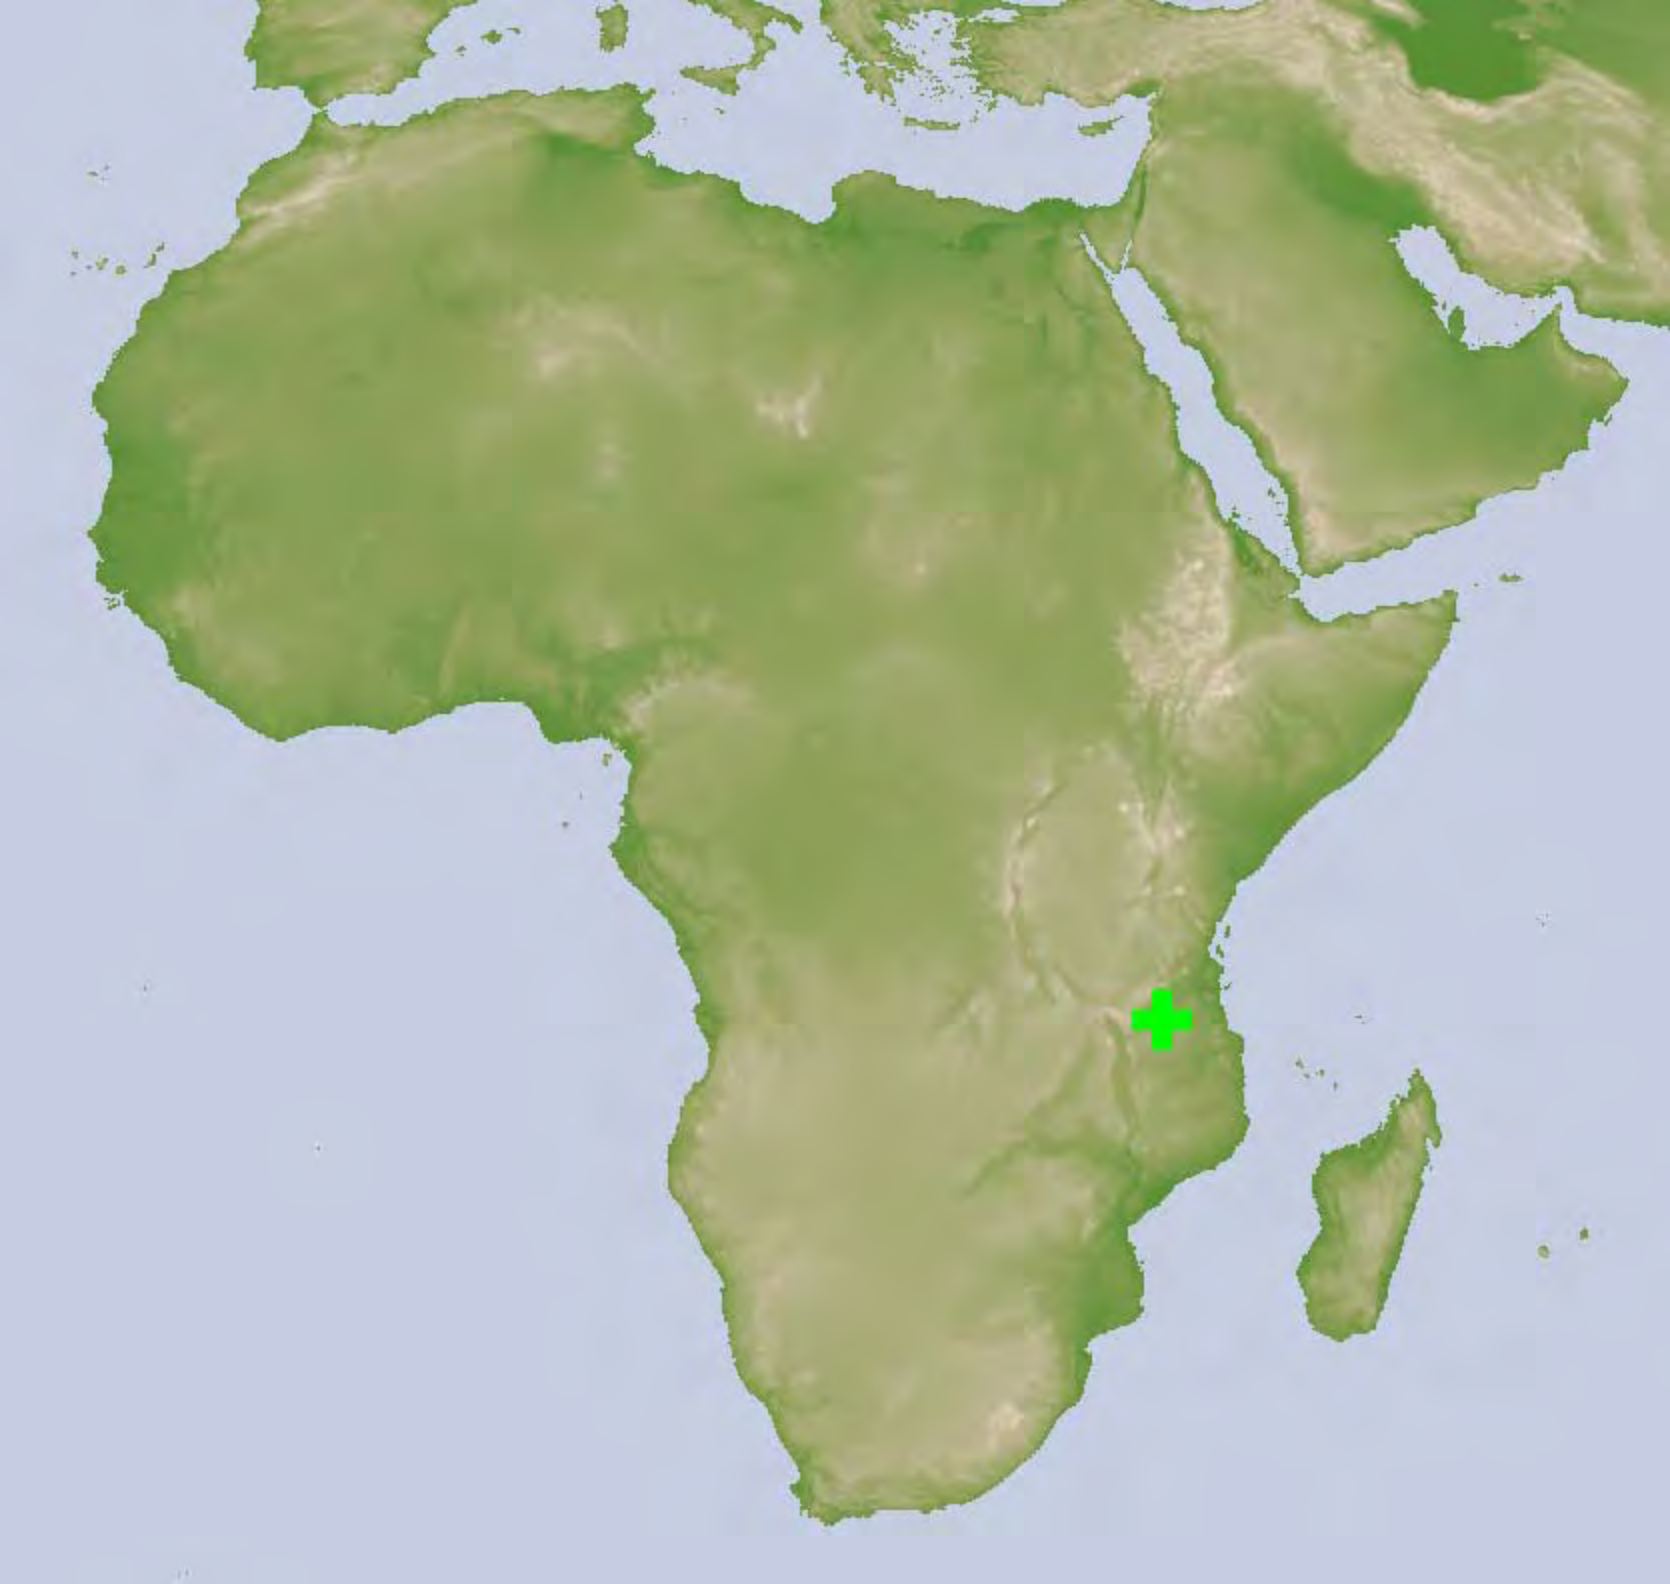









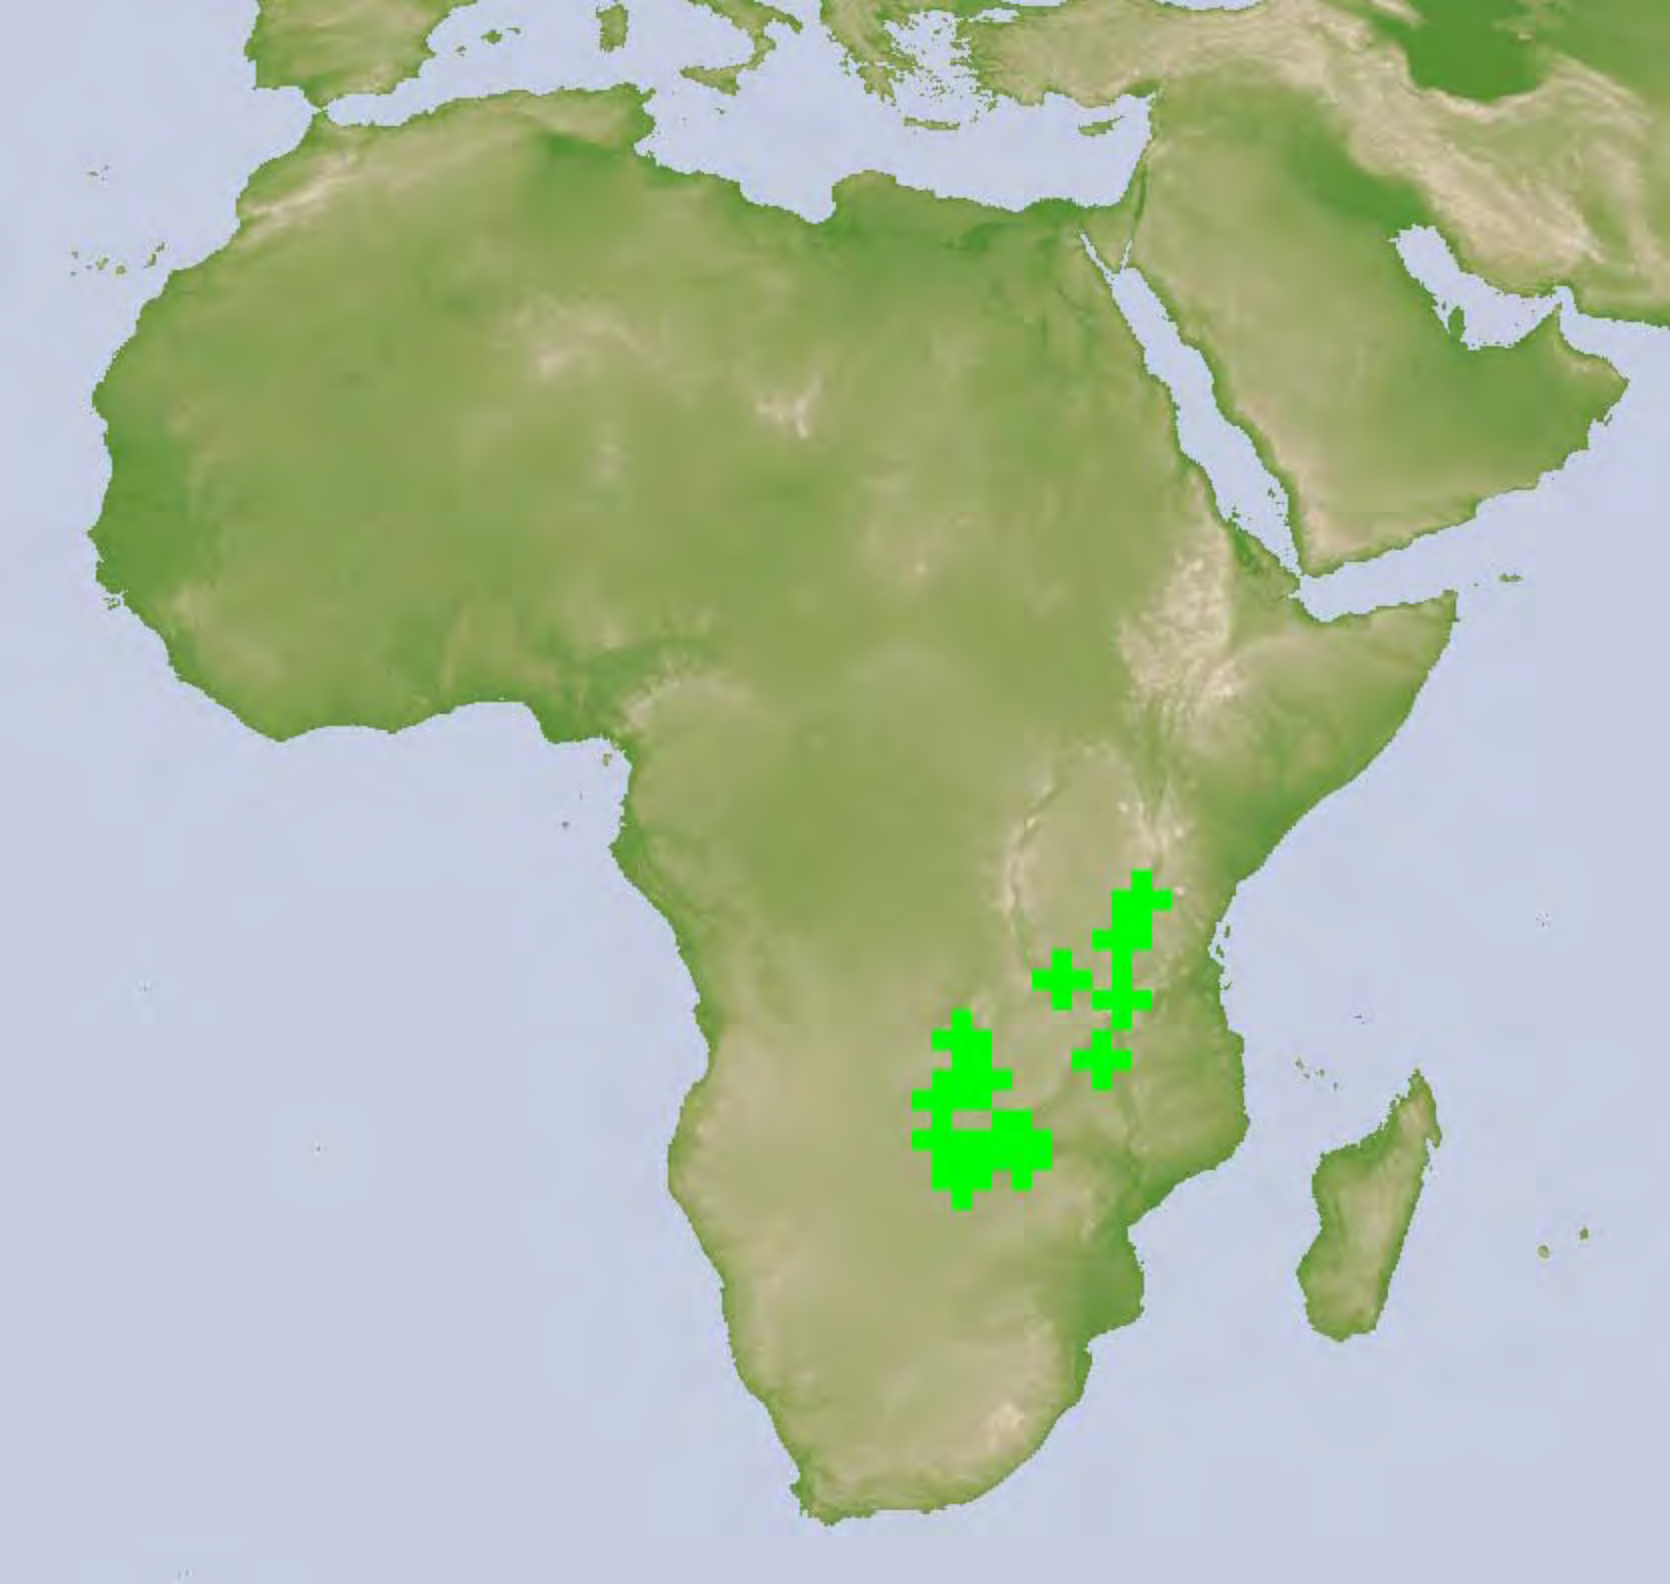



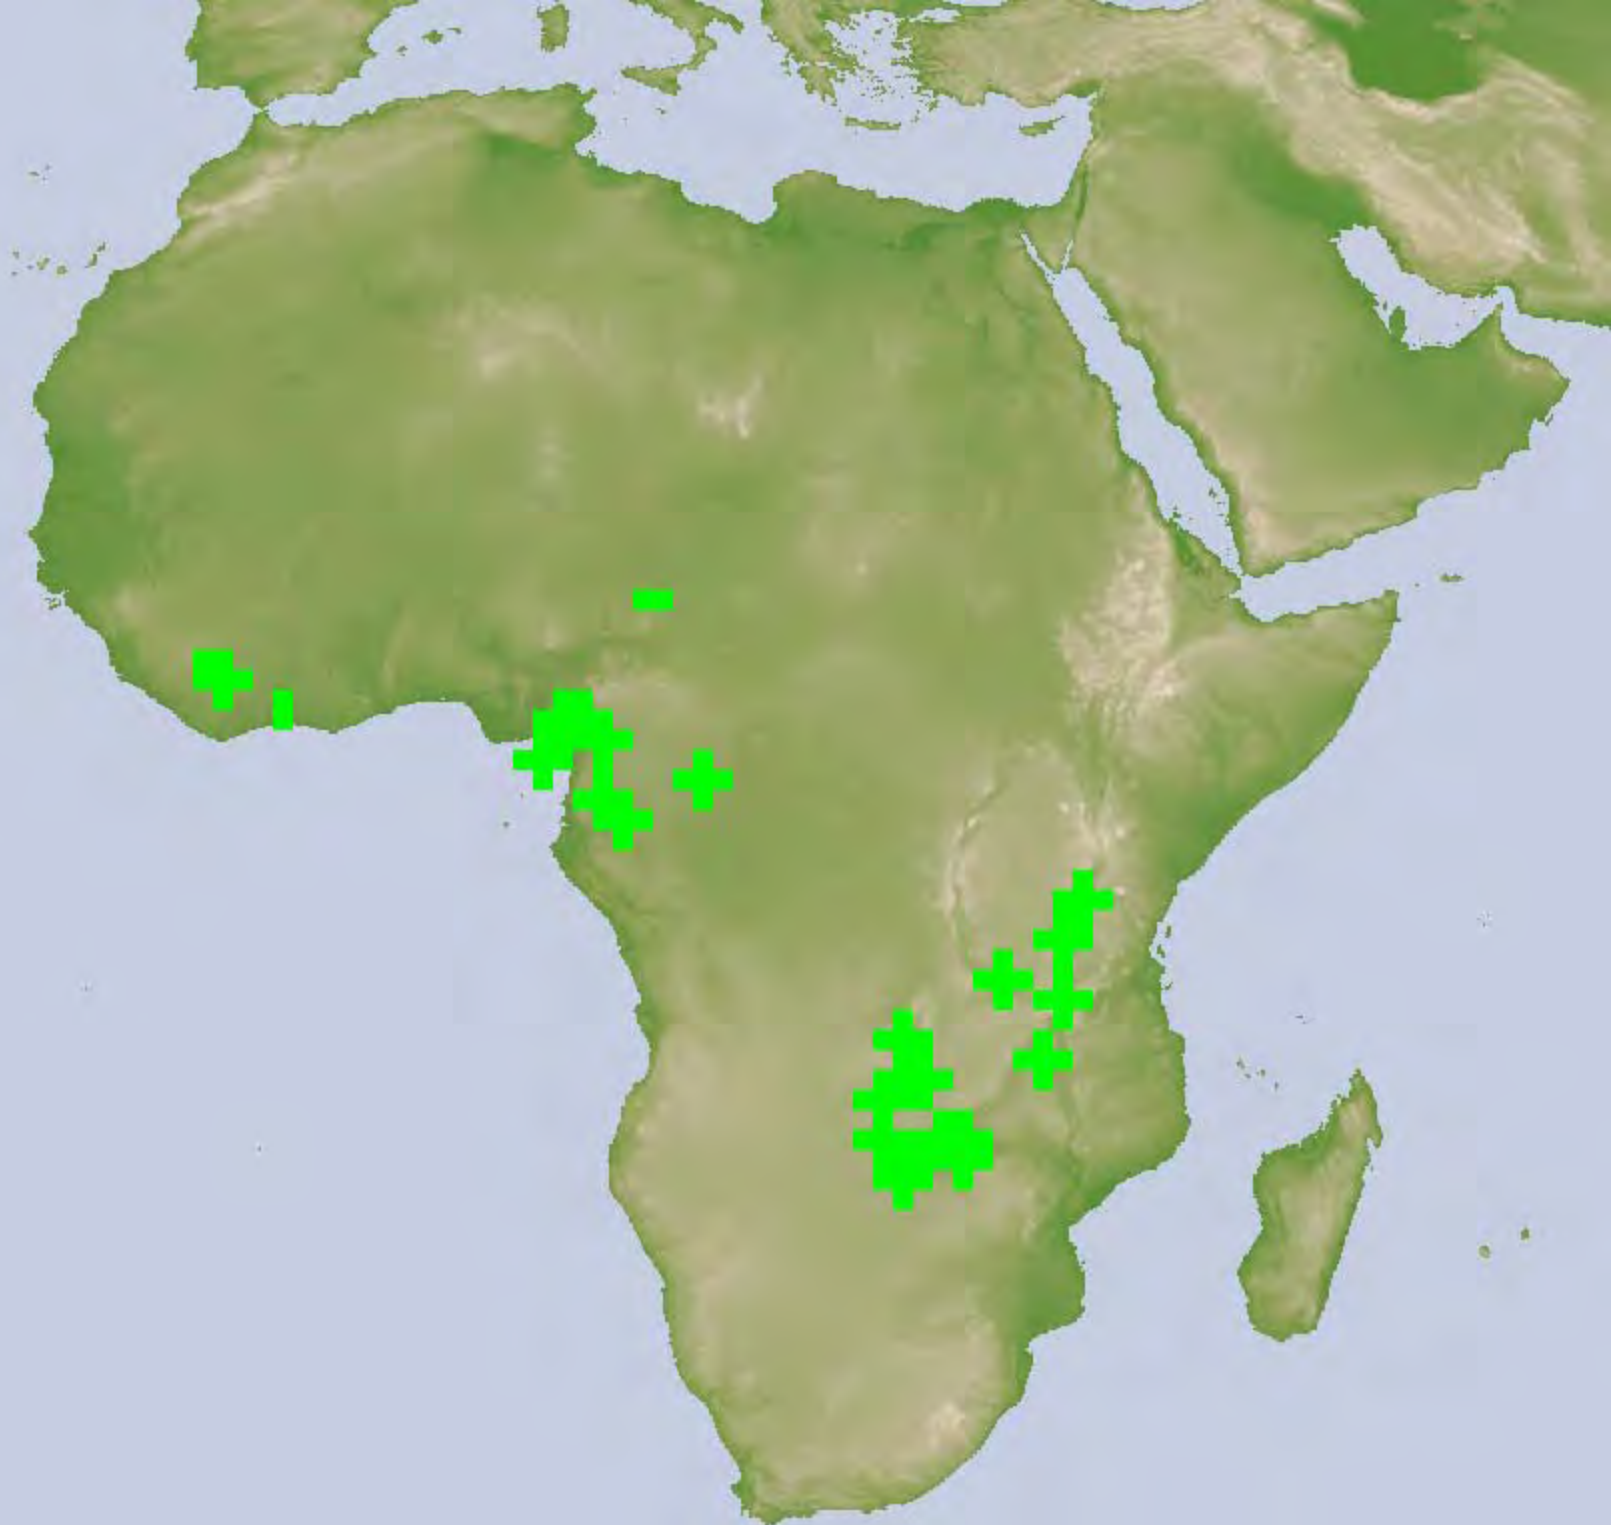









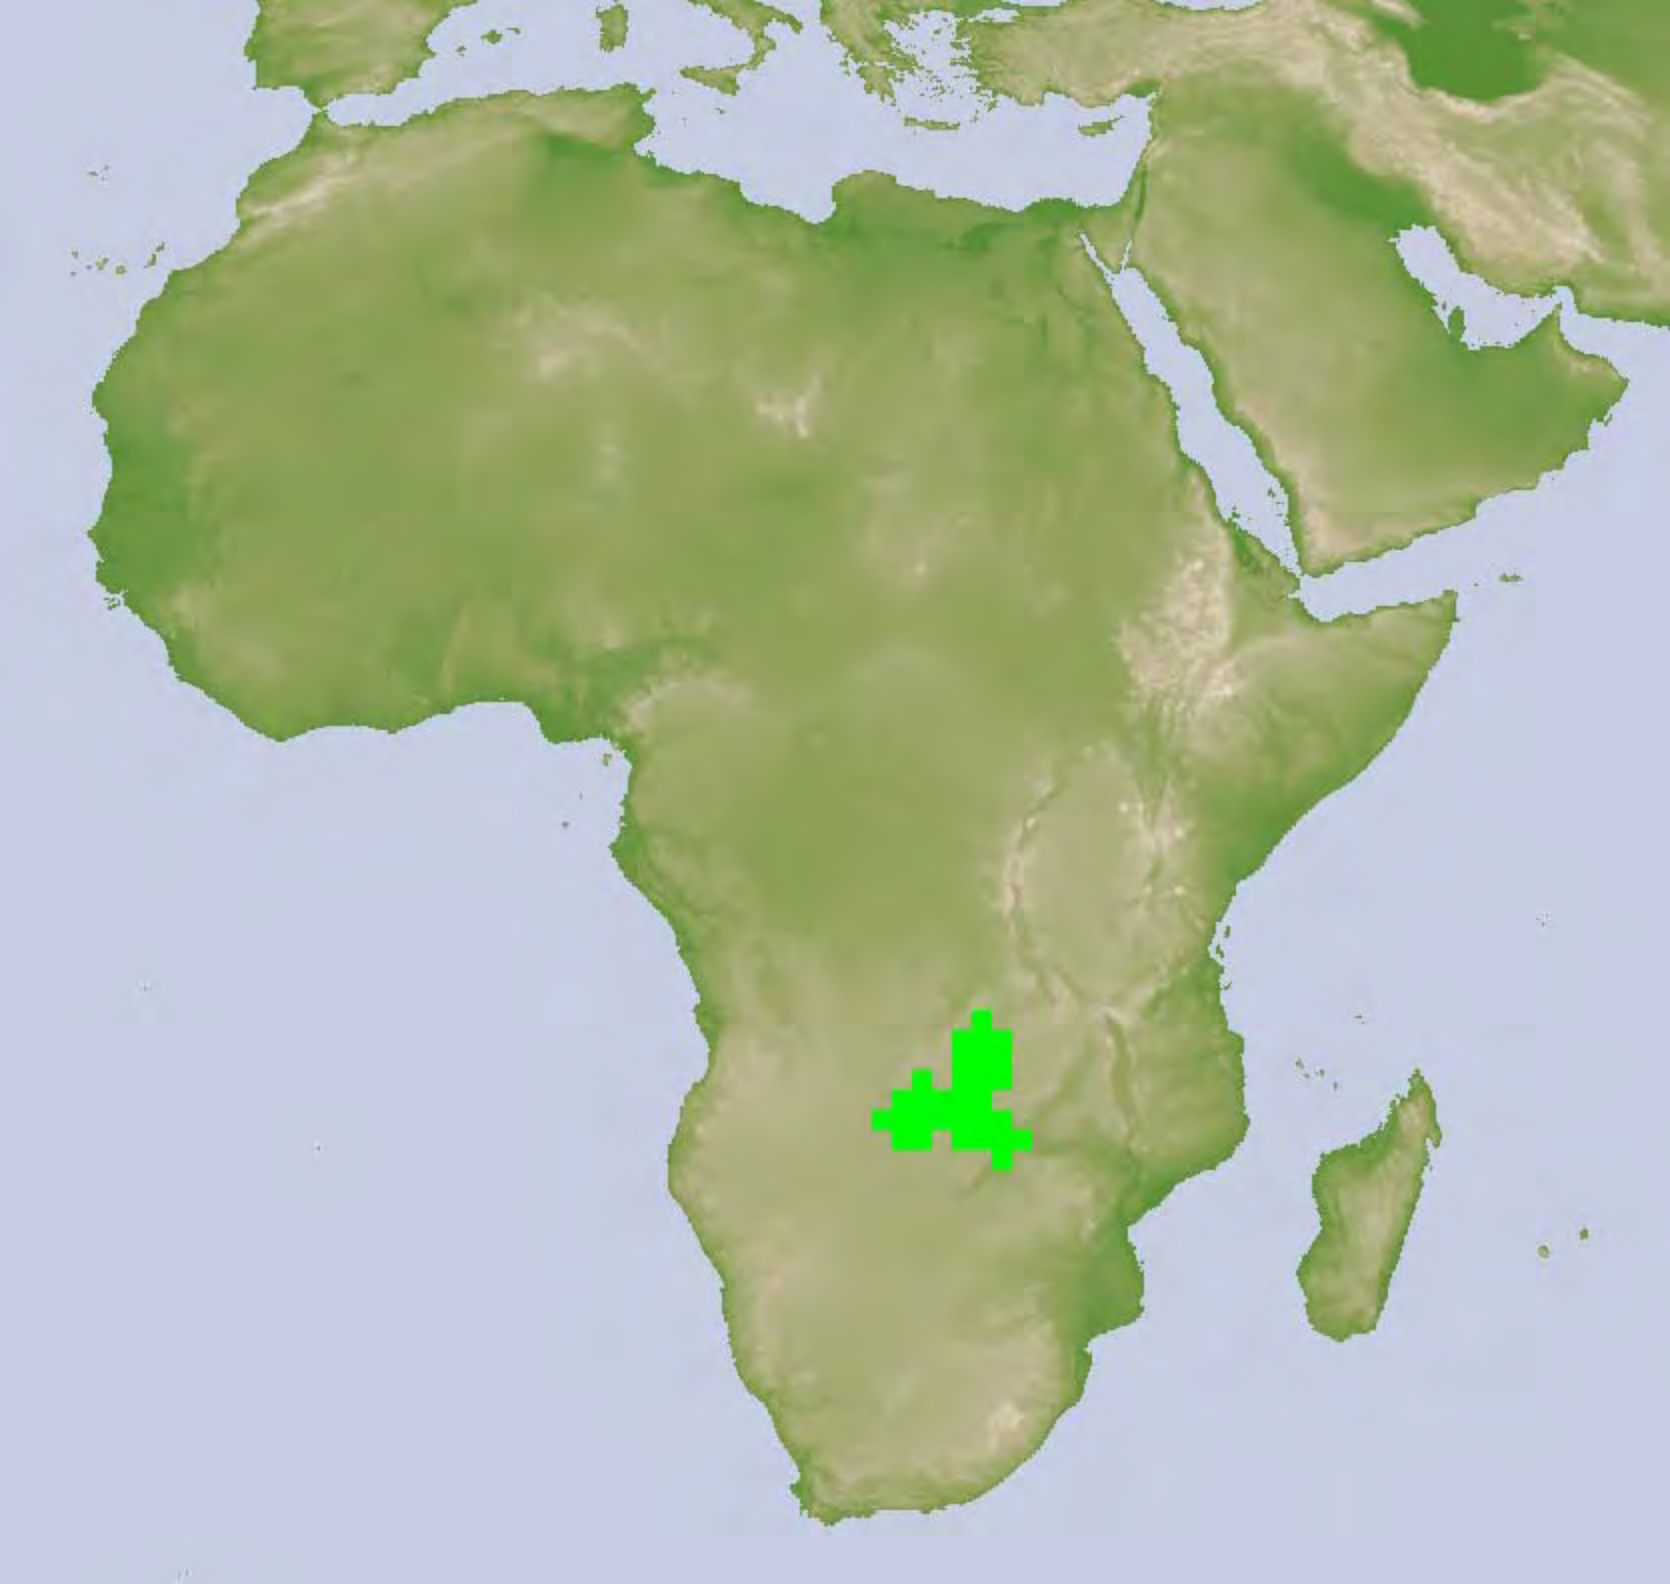













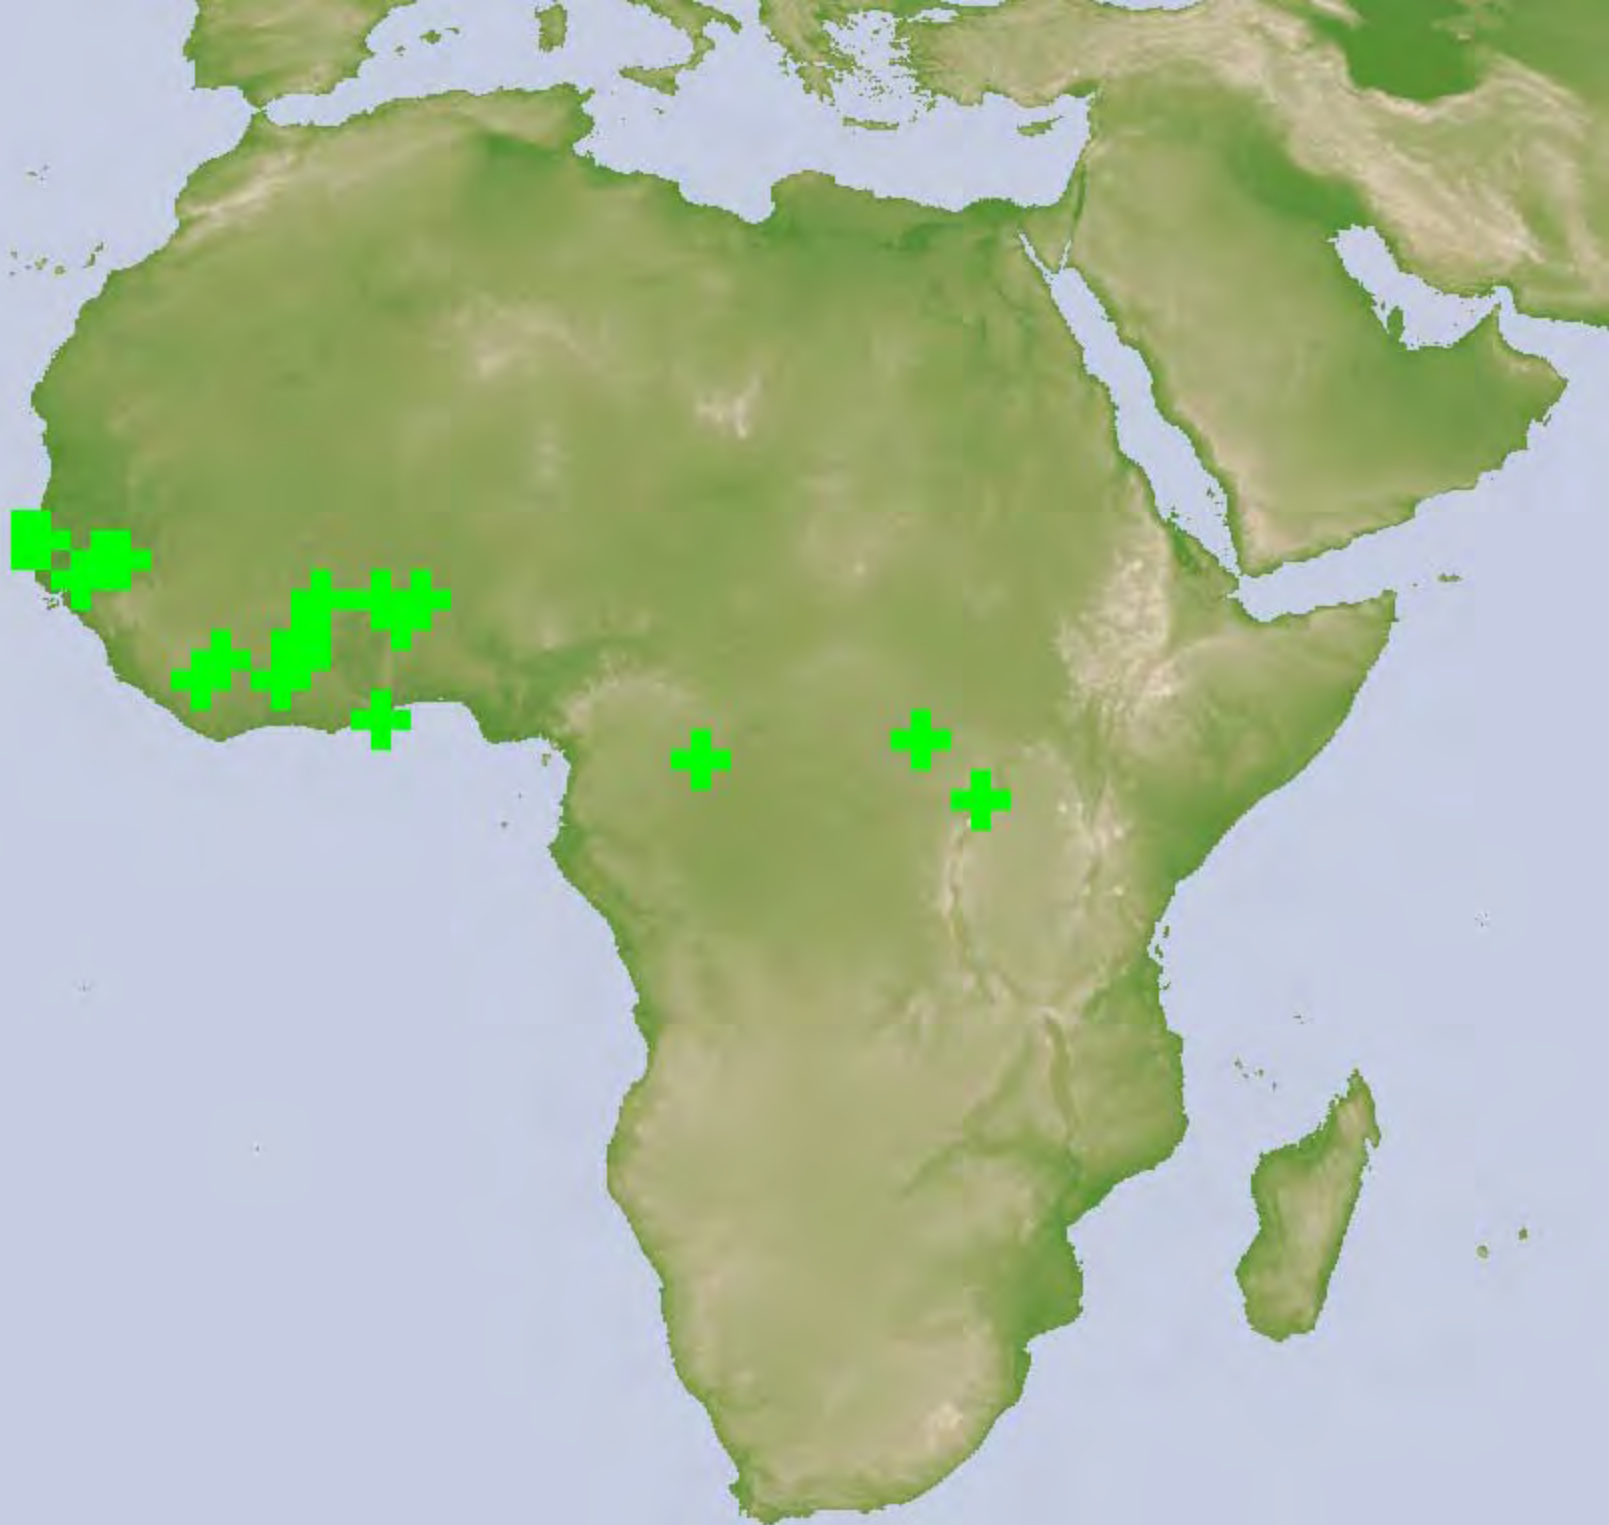



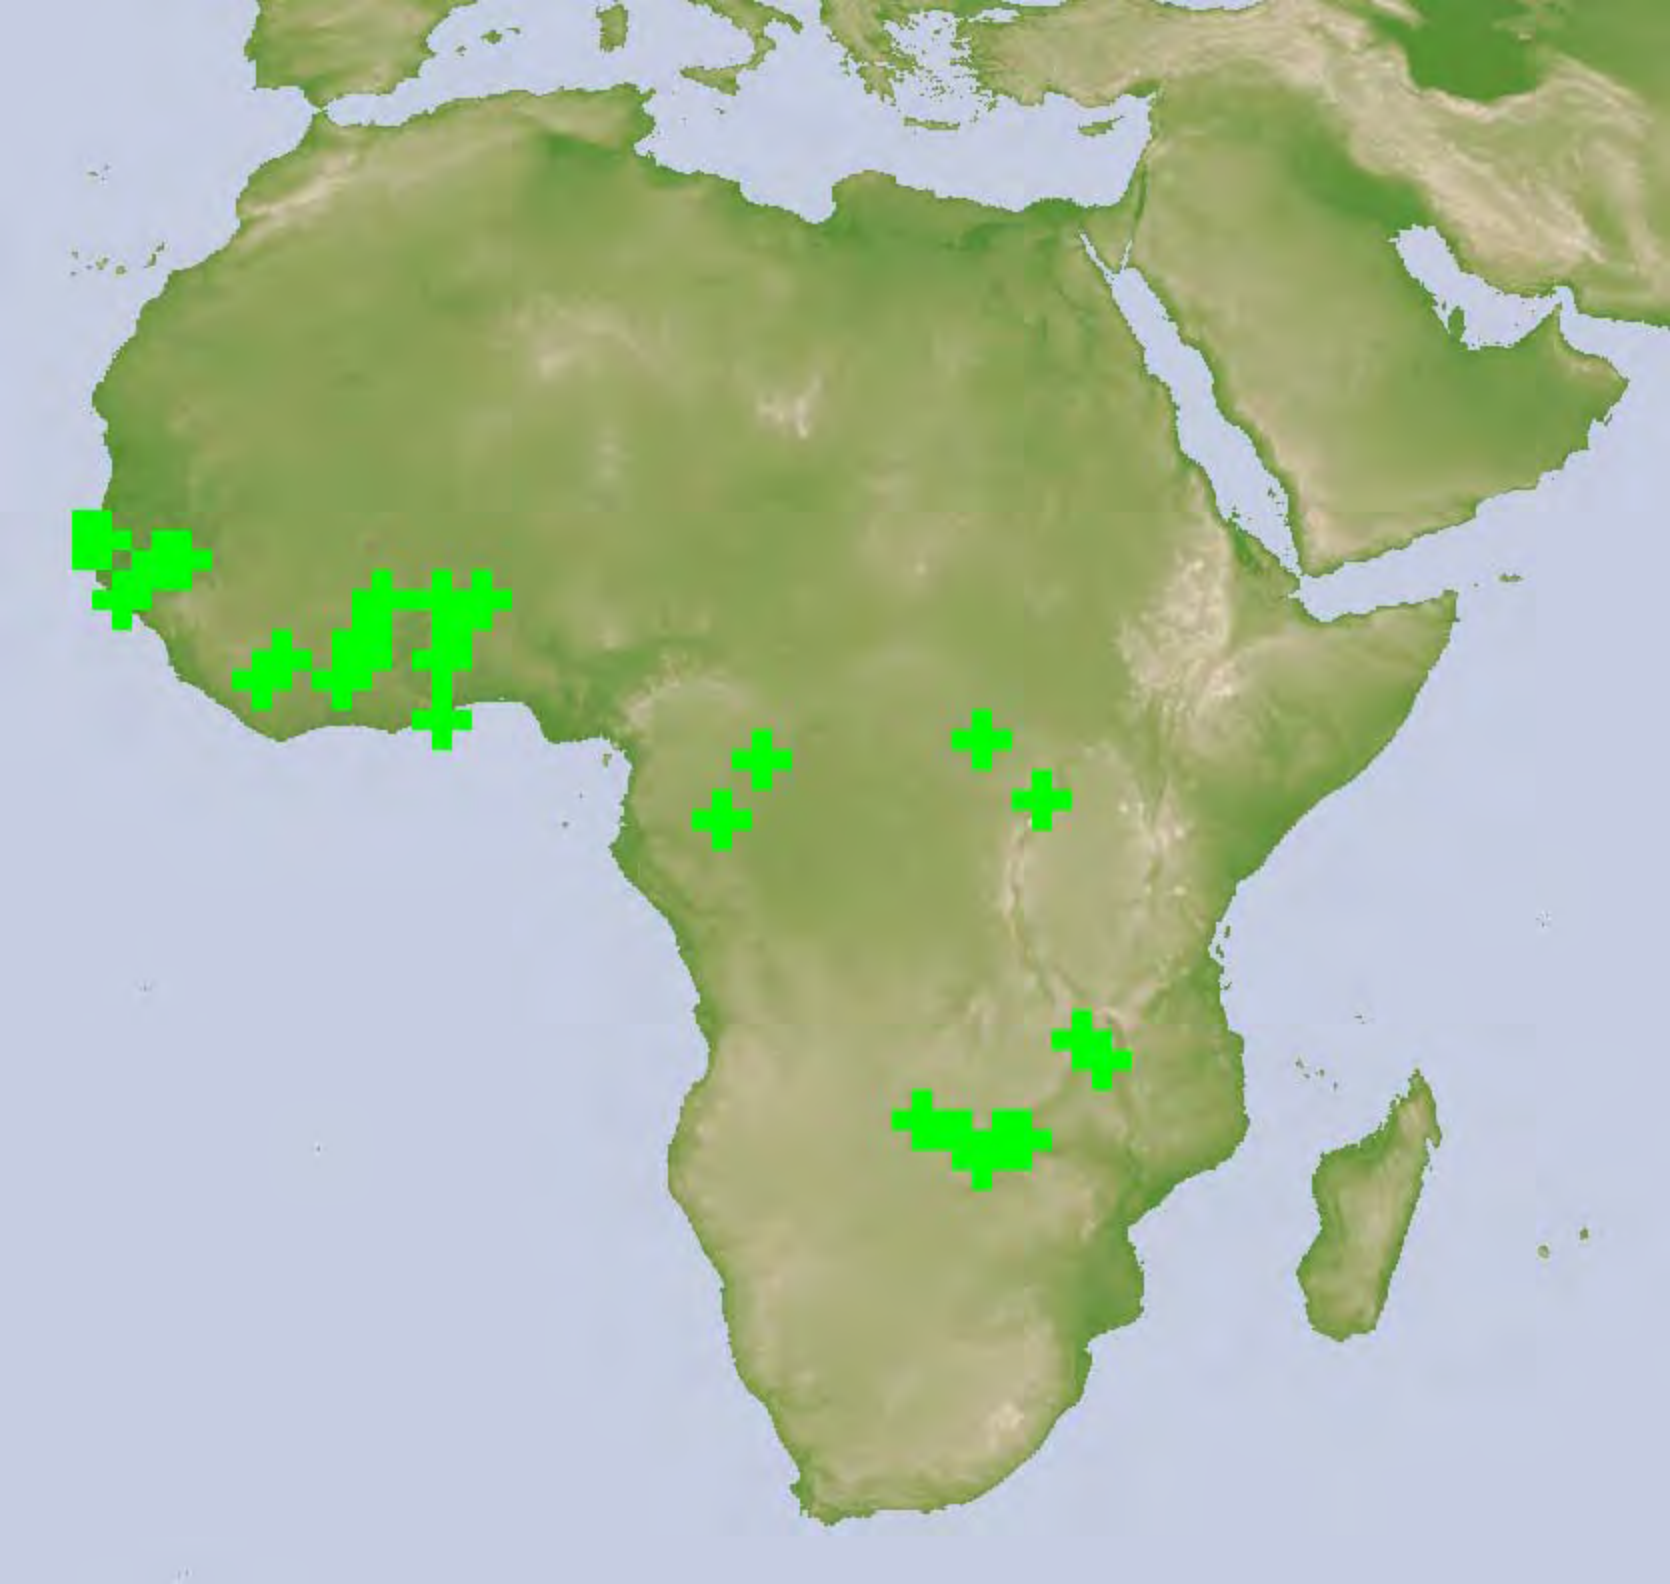





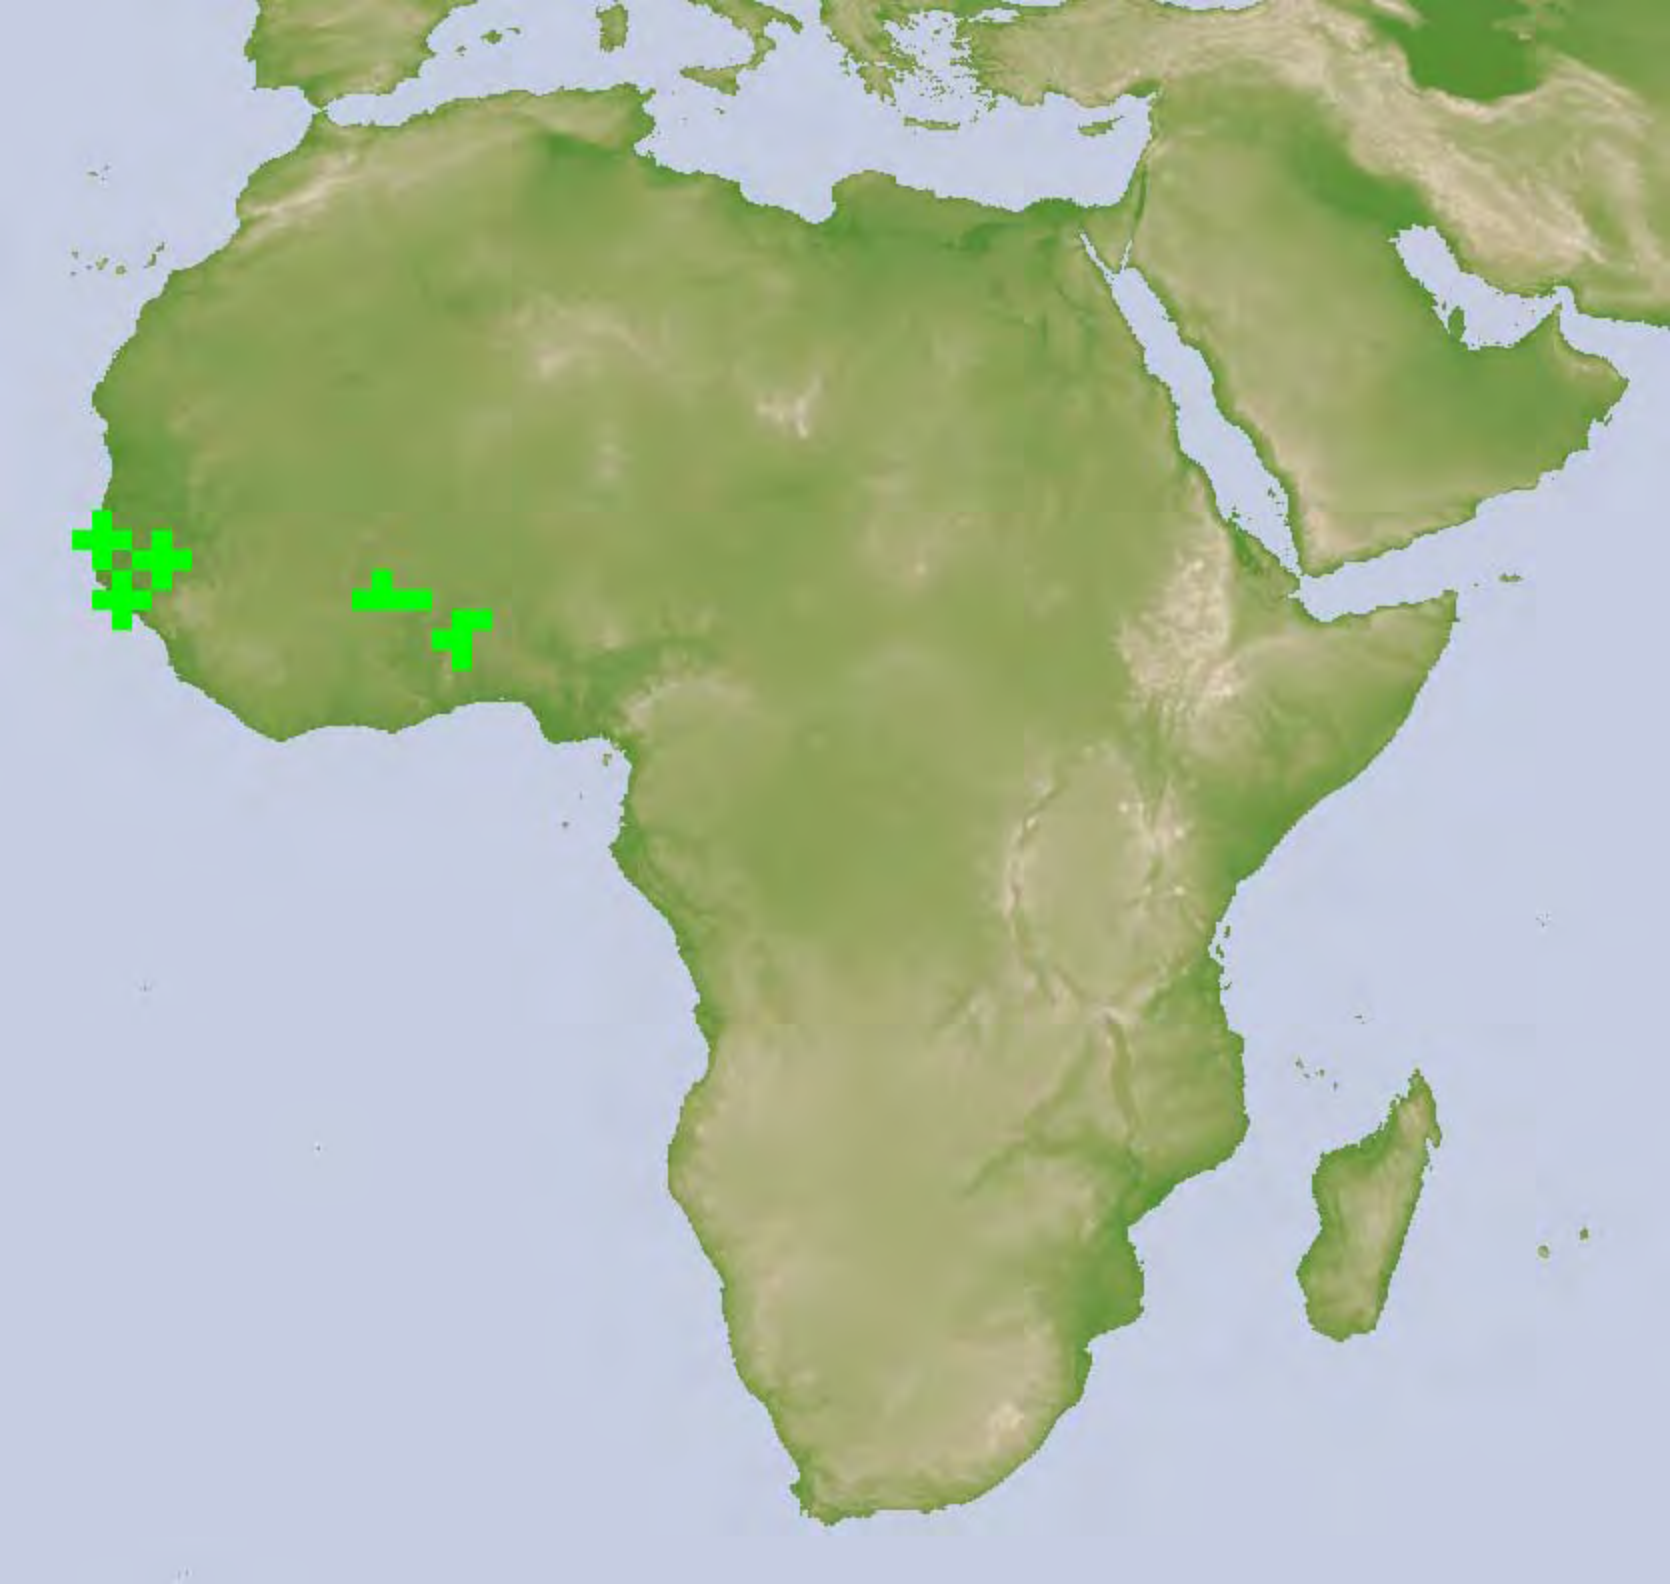



















Supplement: s1 [file s1]
