# Supplementary material for: The Phylogenetic Relationships of Tiaronthophagus n.gen. (Coleoptera, Scarabaeidae, Onthophagini) Evaluated by Phenotypic Characters
Source: MDPI journal article supplement (doi:10.3390/insects10030064), 2019-03-01
Supplement: s1 [file s1]

[illegible][illegible]

[illegible]

[illegible]

|              |                   |                  |                  |                 |                 |                 |                 |                  |                  |                   |                   |                   |
|--------------|-------------------|------------------|------------------|-----------------|-----------------|-----------------|-----------------|------------------|------------------|-------------------|-------------------|-------------------|
| T_katungamus | -0.01366,-0.38057 | 0.03797,-0.22828 | 0.09917,-0.06987 | 0.15097,0.08772 | 0.18944,0.25007 | 0.17688,0.41336 | 0.01019,0.34210 | -0.11605,0.21544 | -0.16521,0.06737 | -0.14951,-0.08553 | -0.12525,-0.23364 | -0.09494,-0.37817 |
| T_jumtoemisi | 0.00081,-0.40355  | 0.03116,-0.23716 | 0.07329,-0.06861 | 0.09966,0.09247 | 0.14818,0.24311 | 0.16291,0.39364 | 0.01714,0.36645 | -0.08165,0.25017 | -0.11520,0.09067 | -0.12104,-0.07781 | -0.11368,-0.24346 | -0.10159,-0.40592 |

T. liberianus -0.00501,-0.40451 0.02241,-0.23947 0.06208,-0.07393 0.10609,0.08154 0.15160,0.23405 0.16968,0.38760 0.01581,0.39990 -0.09374,0.25959 -0.13122,0.10079 -0.12322,-0.07017 -0.09567,-0.23880 -0.07869,-0.40659  
T. maculibarbatus -0.00792,-0.40447 0.01994,-0.24630 0.05692,-0.07880 0.10561,0.07944 0.14870,0.23051 0.16442,0.40241 0.02183,0.36601 -0.08821,0.25356 -0.11778,-0.07075 -0.10383,-0.27279 -0.07373,-0.39901  
T. naevius 0.00373,-0.29300 0.03125,-0.23622 0.06503,-0.06981 0.10987,0.08823 0.15161,0.24388 0.18119,0.30934 0.02052,0.36360 -0.09340,-0.27320 -0.13499,-0.08236 -0.12218,-0.24487 -0.08127,-0.38753  
T. pendjariensis 0.00731,-0.38442 0.04264,-0.22728 0.09143,-0.06766 0.15452,-0.07925 0.18590,0.23393 0.18163,0.39041 0.00127,0.35037 -0.12283,0.23453 -0.16502,-0.08289 -0.15745,-0.07527 -0.10101,-0.23120 -0.08929,-0.39552  
T. pseudohibernicus -0.00802,-0.39612 0.03107,-0.24285 0.06802,-0.07608 0.11584,0.07909 0.15990,0.23554 0.17234,0.39335 0.01119,0.36360 -0.07620,0.25010 -0.11264,-0.08624 -0.11090,-0.07425 -0.10940,-0.23822 -0.07369,-0.39367  
T. roosei -0.1261,-0.37557 0.02731,-0.24029 0.07933,-0.08791 0.13282,0.07341 0.16501,0.24601 0.17603,0.41723 0.01724,0.36997 -0.09926,-0.23729 -0.13893,0.07000 -0.15238,-0.09375 -0.12368,-0.24030 -0.06929,-0.37200  
T. rufogularis 0.02013,-0.39431 0.03195,-0.23629 0.06719,-0.08077 0.10996,0.09197 0.15421,0.24872 0.18241,0.40119 0.02460,0.35858 -0.08755,0.25352 -0.13126,0.07721 -0.14458,-0.08379 -0.13650,-0.23962 -0.09395,-0.39349  
T. rufobandis -0.02348,-0.39223 0.03897,-0.24171 0.08233,-0.08171 0.13035,0.07794 0.17157,0.24091 0.15870,0.40074 0.09163,0.36748 -0.09306,0.24304 -0.13911,0.08461 -0.13361,-0.07946 -0.10267,-0.23540 -0.08533,-0.38755  
T. rufotarsus 0.01355,-0.38603 0.03190,-0.24065 0.08203,-0.08070 0.13015,0.06604 0.17135,0.22788 0.15548,0.39124 0.01027,0.36595 -0.11457,0.25094 -0.16177,0.09166 -0.16295,-0.07316 -0.12371,-0.22732 -0.06172,-0.37686  
T. rufopygus -0.01301,-0.39655 0.03845,-0.24062 0.08494,-0.08614 0.11611,0.07400 0.14278,0.23785 0.16604,0.40020 0.01484,0.37139 -0.09201,0.25109 -0.13554,0.09237 -0.12640,-0.07431 -0.10674,-0.23461 -0.08946,-0.38936  
T. sandwicensis -0.00024,-0.39247 0.03420,-0.24250 0.07751,-0.08012 0.11520,0.07421 0.15824,0.23017 0.17134,0.38770 0.01216,0.37525 -0.09603,0.25971 -0.13923,0.09560 -0.14570,-0.07484 -0.11076,0.23993 -0.06104,-0.39133  
T. schauinslandi -0.01089,-0.38767 0.02189,-0.23582 0.08874,-0.08762 0.13796,0.06855 0.17109,0.23679 0.19530,0.40312 0.01356,0.36139 -0.12156,0.2776 -0.17446,0.07823 -0.16220,-0.08310 -0.10753,-0.22904 -0.06052,-0.37276  
T. viridifrons 0.00928,-0.37695 0.03357,-0.22564 0.06168,-0.06064 0.12135,0.09634 0.15855,0.25914 0.18280,0.41727 0.02693,0.35780 -0.08215,0.22544 -0.12653,0.09548 -0.14402,-0.09924 -0.13891,-0.24916 -0.09596,-0.39152  
T. zambesinus 0.01144,-0.40551 0.03086,-0.24254 0.07688,-0.07925 0.12695,0.09091 0.15840,0.23773 0.16993,0.39480 0.02253,0.36160 -0.09453,0.25154 -0.12528,0.09704 -0.12220,-0.09028 -0.10802,-0.23316 -0.09151,-0.39707  
T. zanzibari -0.00081,-0.39973 0.03582,-0.23562 0.08051,-0.07349 0.12138,0.08041 0.16562,0.23318 0.17771,0.38810 0.01049,0.36056 -0.10090,0.24674 -0.15500,0.09467 -0.13597,-0.06795 -0.10259,-0.23037 -0.08810,-0.39648

£(landmark 2D)

E. flavimargo -0.20022,0.07958 -0.13406,0.11170 0.06262,0.10178 0.00795,0.08285 0.07961,0.11003 0.14505,0.10261 0.18676,0.08603 0.39453,-0.04070 -0.42216,0.01490 -0.29975,0.09558 0.36601,0.07337 -0.26601,-0.04467 -0.21572,-0.06905 -0.16175,-0.07399 -0.10544,0.07222 -0.05474,-0.07761 0.00581,-0.07745 0.06564,-0.07774 0.11841,-0.07940 0.16629,-0.08397 0.22370,-0.08664 0.27004,-0.06920  
M. pallens -0.19920,0.07448 -0.11684,0.11538 0.05612,-0.07880 -0.07334,0.15206 -0.00800,0.18164 0.08355,0.16344 0.15747,0.14254 0.21017,0.12227 0.33664,-0.04077 -0.34312,-0.03136 -0.27442,-0.08763 0.25453,0.06847 -0.21219,-0.09576 -0.17273,-0.09078 -0.13030,-0.09285 -0.08778,-0.09177 -0.04471,-0.09133 0.04506,-0.09580 0.08926,-0.10117 0.12674,-0.10442 0.16967,-0.10663 0.21134,-0.10568  
H. hispidulatus -0.20793,0.11369 -0.14124,0.14022 0.06426,0.15187 0.01706,0.15508 0.09322,0.14656 0.15902,0.12825 0.20960,0.12090 0.34222,-0.06677 0.37668,-0.01642 0.24047,0.07553 -0.22915,-0.06761 -0.18731,-0.08379 -0.13636,-0.09024 -0.08426,-0.10589 0.00388,-0.10607 0.05011,-0.10749 0.09586,-0.10321 0.19394,-0.10170 0.18178,-0.09144 0.22452,-0.07460  
P. mackenziesi 0.20782,0.12296 -0.16148,0.16484 -0.00072,-0.01498 0.00772,-0.01498 0.08746,-0.15965 0.16161,0.11962 0.31678,-0.04476 -0.30907,-0.02173 0.26910,-0.09615 -0.18027,-0.10139 -0.15516,-0.10893 -0.12035,-0.10708 -0.08136,-0.10718 -0.04404,-0.10807 -0.05999,-0.10983 0.03453,-0.11333 0.07420,-0.11681 0.11048,-0.12098 0.14336,-0.12586 0.17372,-0.13070  
O. nigritervis 0.01567,0.09055 -0.15160,0.18154 0.02980,-0.15516 0.00850,-0.15762 0.01860,0.16132 0.09446,-0.15077 0.17090,0.21203 0.24500,0.07154 0.23946,-0.11058 -0.30700,-0.10017 0.27211,-0.02690 -0.26246,-0.04974 -0.22127,-0.02509 -0.16534,-0.04155 -0.10781,-0.03568 -0.05397,-0.03538 -0.00087,-0.06091 0.05121,-0.04086 0.10077,-0.03989 0.19064,-0.04283 0.21813,-0.05511 0.24054,-0.05945  
P. coenobia 0.23868,0.11790 -0.16160,0.17889 0.10256,0.20689 0.00850,-0.21993 0.11216,0.20816 0.20020,0.17189 0.25588,0.10523 0.29773,-0.01666 -0.29273,-0.06433 -0.26959,0.07167 0.32343,0.04323 -0.19951,0.12348 -0.12727,0.11269 -0.10008,-0.10124 -0.06798,-0.07775 -0.06376,-0.05991 -0.00554,-0.09636 0.02558,-0.09904 0.05339,-0.10473 0.07960,-0.11118 0.10721,-0.12012 0.13312,-0.12321  
P. roosei -0.22237,0.08488 -0.17457,0.13672 0.08750,0.17449 0.01022,0.18531 0.10315,0.17013 0.17611,0.27225 0.23976,0.06774 0.35163,-0.09282 -0.34983,-0.07833 -0.29145,0.09417 0.30455,0.03508 -0.20532,-0.09224 -0.16068,-0.07314 -0.12725,-0.06645 -0.08505,-0.06745 -0.04717,-0.06721 -0.00615,-0.07037 0.00401,-0.07158 0.07401,-0.07334 0.12260,-0.07464 0.16427,-0.08664 0.20054,-0.11356  
P. medius -0.19365,0.11490 -0.14097,0.15292 0.07180,0.17534 0.00712,0.18195 0.08488,0.17180 0.15309,0.14693 0.20305,0.10533 0.3128,-0.04850 -0.32206,-0.02335 -0.25252,-0.09221 0.28562,0.07269 0.21104,-0.0717 -0.17902,-0.04238 -0.14148,-0.10558 -0.10079,-0.09950 -0.05692,-0.10145 -0.01235,-0.10028 0.02321,-0.10219 0.07165,-0.10489 0.12087,-0.10836 0.16392,-0.10957 0.20704,-0.11393  
O. jilyricus -0.20665,0.12661 -0.14321,0.15992 0.07011,0.17090 0.00922,0.17035 0.08771,0.16691 0.16345,0.13361 0.21071,0.10659 0.31582,-0.10334 -0.34099,-0.08846 -0.26251,0.06048 0.24814,-0.00159 -0.20294,-0.10175 -0.17028,-0.09915 -0.12908,-0.09247 -0.08486,-0.09674 -0.04471,-0.09840 -0.00462,-0.10125 0.04512,-0.10283 0.08617,-0.09914 0.12865,-0.10212 0.17035,-0.11164 0.20985,-0.11386  
T. angustulus -0.18733,0.12268 -0.12778,0.16272 0.05821,-0.17659 0.01560,-0.17996 0.08791,0.17142 0.14795,0.15034 0.19536,0.10882 0.33484,-0.05978 -0.35667,-0.06698 -0.25795,-0.04309 -0.17485,0.03810 -0.38877,-0.09390 -0.19405,-0.08481 -0.14394,-0.08795 -0.09332,-0.08440 -0.04716,-0.08785 -0.00167,-0.09293 0.04148,-0.09162 0.08737,-0.09109 0.13585,-0.09358 0.18457,-0.09272 0.22645,-0.10039  
T. chrysoides -0.22147,0.13633 -0.15645,0.16172 0.07959,0.18968 0.00379,0.20700 0.08702,0.19050 0.16924,0.16789 0.24677,0.12791 0.31625,-0.12122 -0.32084,-0.10110 -0.25843,-0.08519 0.29289,0.07103 -0.24857,-0.10984 -0.17490,-0.08430 -0.11690,-0.09070 -0.07007,-0.09147 0.02912,-0.09053 0.06436,-0.08964 0.09598,-0.09066 0.13132,-0.09196 0.16913,-0.09438  
T. delahayei -0.22420,0.1242 -0.16075,0.16464 0.08190,0.18161 0.04809,0.1896 0.09061,0.18407 0.17055,0.17175 0.22461,0.11399 0.34376,-0.12366 -0.35230,-0.10286 -0.27374,-0.07323 0.27272,0.03581 -0.17999,-0.08674 -0.15740,-0.08765 -0.08554,-0.09015 -0.00707,-0.09147 0.02912,-0.09053 0.06436,-0.08964 0.09598,-0.09066 0.13132,-0.09196 0.16913,-0.09438  
T. delahayei -0.19264,0.12601 -0.13054,0.14928 0.06473,0.15346 0.00424,0.15793 0.07311,0.14962 0.14281,0.13521 0.21313,0.10960 0.33534,-0.01515 -0.35352,-0.07688 -0.25968,0.03328 -0.20395,0.02925 -0.25414,-0.09360 -0.16125,-0.06978 -0.16125,-0.06430 -0.11289,-0.06716 -0.06104,-0.06823 -0.00211,-0.07135 0.05494,-0.07178 0.10745,-0.07120 0.16189,-0.07130 0.21147,-0.08712 0.25037,-0.12216  
T. ebaneus -0.19583,0.15586 -0.13678,0.19214 0.06572,0.20765 0.01051,0.21401 0.08441,0.20519 0.15188,0.18121 0.20675,0.13815 0.31592,-0.09508 -0.33106,-0.07281 -0.24877,0.00901 0.25601,0.05880 -0.18557,-0.10063 -0.15122,-0.11012 0.13001,-0.11376 0.06763,-0.11718 0.04146,-0.11700 0.00528,-0.11572 0.02879,-0.11732 0.08569,-0.11718 0.10114,-0.11772 0.13669,-0.11472 0.17515,-0.10974  
T. flexuosus -0.19794,0.1165 -0.13983,0.16162 0.06171,0.18387 0.01483,0.19170 0.09270,0.17916 0.16015,0.14824 0.20876,0.09935 0.31752,-0.12341 -0.33924,-0.09742 -0.25935,0.02040 -0.20404,0.07161 -0.22928,-0.10967 -0.19317,-0.08988 -0.10278,-0.08923 -0.05602,-0.07036 -0.03322,-0.07015 0.04277,-0.06975 0.08810,-0.06954 0.13475,-0.07485 0.18120,-0.08845 0.22301,-0.11082  
T. hemichlorus -0.23420,0.16389 -0.13828,0.21009 0.07440,0.22972 0.00150,0.24916 0.09932,0.23812 0.18604,0.19988 0.25520,0.14170 0.27927,-0.11746 -0.25494,-0.09604 -0.26800,-0.07020 0.31095,0.05256 -0.12107,-0.12330 -0.10036,-0.12802 -0.07717,-0.12115 -0.05456,-0.11837 -0.02966,-0.11685 -0.00549,-0.11679 0.01694,-0.11802 0.03828,-0.12085 0.05871,-0.12454 0.07984,-0.12350 0.10140,-0.13622  
T. jossii -0.18691,0.17501 -0.13244,0.21014 0.07095,0.21850 -0.00519,0.22676 0.006154,0.21822 0.13000,0.17771 0.19899,0.15019 0.30900,-0.08742 -0.32950,-0.06359 -0.27960,0.03150 0.27960,0.07619 0.16096,-0.11578 -0.13772,-0.08078 -0.10771,-0.07128 -0.09256,-0.08513 -0.04777,-0.07128 -0.05991,-0.08453 0.00225,-0.08959 0.05661,-0.08597 0.10825,-0.08084 0.16021,-0.07796 0.20199,-0.08297 0.24444,-0.10712  
T. lamensis -0.22792,0.15905 -0.16987,0.19437 0.09140,0.22558 0.00961,0.22907 0.17491,0.19351 0.24448,0.14805 0.28729,-0.10958 -0.27011,-0.08689 -0.25627,0.08021 0.29353,0.06265 -0.14801,-0.14104 0.19791,-0.09178 -0.12677 -0.09595,-0.11693 -0.06422,-0.10826 -0.03360,-0.10665 -0.00637,-0.10576 0.04127,-0.10834 0.05549,-0.11352 0.07798,-0.12199 0.10212,-0.13150 0.13035,-0.14568  
T. liberianus -0.18216,0.14983 -0.10860,0.17562 0.06480,0.18151 0.00435,0.18890 0.07264,0.19029 0.13820,0.16255 0.19651,0.17308 0.27965,-0.09596 -0.33585,-0.08092 0.24631,0.06960 0.26499,0.03333 -0.10277,-0.08004 -0.17417,-0.09314 -0.13871,-0.10238 -0.09346,-0.10995 -0.05519,-0.11563 -0.00361,-0.12020 0.01496,-0.12076 0.06389,-0.12103 0.12812,-0.11538 0.17554,-0.10816 0.21339,-0.09861  
T. maculibarbatus -0.21473,0.13633 -0.15645,0.16172 0.07959,0.18968 0.00379,0.20700 0.08702,0.19050 0.16924,0.16789 0.24677,0.12791 0.31625,-0.12122 -0.32084,-0.10110 -0.25843,-0.08519 0.29289,0.07103 -0.24857,-0.10984 -0.17490,-0.08430 -0.11690,-0.09070 -0.07007,-0.09147 0.02912,-0.09053 0.06436,-0.08964 0.09598,-0.09066 0.13132,-0.09196 0.16913,-0.09438  
T. naevius -0.19219,0.15189 -0.13162,0.17208 0.06765,0.19272 0.00172,0.17880 0.06999,0.18812 0.14580,0.16913 0.20167,0.13143 0.32138,-0.05397 -0.33171,-0.05095 -0.24718,-0.07057 0.25258,0.05430 -0.20007,-0.06665 -0.17348,-0.10708 -0.12384,-0.11202 -0.09031,-0.11767 -0.08843,-0.12017 -0.00115,-0.11840 0.04467,-0.11972 0.08419,-0.12023 0.12333,-0.12450 0.16139,-0.12386 0.20320,-0.10425  
T. pendjariensis -0.18953,0.12289 -0.13108,0.16033 -0.06920,0.17934 -0.00309,0.18479 0.06261,0.17385 0.12776,0.15002 0.19254,0.10918 0.32376,-0.09996 -0.33691,-0.08691 -0.25182,0.05996 0.26499,0.03333 -0.10277,-0.08004 -0.17417,-0.09314 -0.13871,-0.10238 -0.09346,-0.10995 -0.05519,-0.11563 -0.00361,-0.12020 0.01496,-0.12076 0.06389,-0.12103 0.12812,-0.11538 0.17554,-0.10816 0.21339,-0.09861  
T. rufogularis -0.18444,0.12778 -0.13052,0.19294 0.06922,0.18386 0.00980,0.18166 0.08322,0.17902 0.14957,0.15853 0.20207,0.11297 0.34120,-0.06356 -0.34222,-0.04273 -0.26665,0.09927 0.26430,0.04415 -0.18291,-0.09276 -0.17726,-0.09243 -0.13473,-0.09408 -0.08711,-0.09356 -0.04297,-0.11004 -0.00261,-0.11806 0.03895,-0.11116 0.07669,-0.10149 0.10680,-0.09926 0.15995,-0.10077 0.20795,-0.09610  
T. schauinslandi -0.18280,0.12227 -0.12075,0.18579 0.06217,0.17188 0.00860,0.17419 0.07547,0.16996 0.13972,0.15315 0.19651,0.11614 0.31800,-0.08252 -0.34338,-0.05440 -0.25180,0.06027 0.25347,0.03122 -0.24996,-0.11461 -0.20810,-0.08991 -0.16063,-0.07227 -0.03304,-0.07777 0.00069,-0.08351 0.05146,-0.08345 0.10666,-0.08313 0.16146,-0.08892 0.20481,-0.10791 0.24514,-0.13013  
T. viridifrons -0.21276,0.15801 -0.15215,0.19170 0.07759,0.22294 0.00876,0.24604 0.08780,0.23258 0.16310,0.19183 0.23121,0.14962 0.28749,-0.08671 -0.28915,-0.06988 -0.25673,-0.09097 0.29254,0.08080 -0.14834,-0.11618 -0.12011,-0.12347 -0.09031,-0.12624 -0.03278,-0.12956 -0.00288,-0.13076 0.00385,-0.10749 0.06960,-0.12969 0.12196,-0.12910  
T. zambesinus -0.22194,0.14957 -0.16370,0.18931 0.08099,0.20582 -0.06740,0.20144 0.00930,0.17433 0.07322,0.16884 0.14231,0.15423 0.21001,0.12315 0.32791,-0.09348 -0.33867,-0.06049 -0.25468,0.0514 -0.25908,0.03947 -0.23059,-0.10154 -0.19004,-0.09027 -0.14596,-0.07990 -0.09596,-0.08019 -0.05572,-0.08631 -0.00607,-0.09285 0.03740,-0.09001 0.09417,-0.09043 0.14051,-0.08971 0.18520,-0.10270 0.22682,-0.12006  
T. zanzibari -0.19277,0.14108 -0.13170,0.15893 0.06574,0.17124 0.00930,0.17433 0.07322,0.16884 0.14231,0.15423 0.21001,0.12315 0.32791,-0.09348 -0.33867,-0.06049 -0.25468,0.0514 -0.25908,0.03947 -0.23059,-0.1015
