# Supplementary material for: The Phylogenetic Relationships of Tiaronthophagus n.gen. (Coleoptera, Scarabaeidae, Onthophagini) Evaluated by Phenotypic Characters
Source: MDPI journal article supplement (doi:10.3390/insects10030064), 2019-03-01
Supplement: s1 [file s1]

## Appendix 5. List of the major differences of the morphological features among the Tiaronthophagus species

---

### female clypeus

ogival-shaped, very wrinkled , with more or less evident points

*rufopygus; jossoui; macroliberianus; liberianus; pseudoliberianus*

rounded with a notch in the middle, the margin up-turned, more or less wrinkled, with large points on sides

*viridiaereus; hemichlorus; lamtoensis; chrysoderus; flexicornis; delahayei; rufobasalis; katanganus; aequatus; angolensis; rougonorum; rufostillans; naevius; ebenus; curtipilis; pendjarius; rolandoi; schaufussi; zavattari; zambesianus*

slightly triangular-shaped, anteriorly truncated, wrinkled, with some large points on clypeus surface

*saadaniensis*

## male clypeus

largely ogival, anteriorly margin up-turned , small points on the whole surface, with some larger ones near the genal sutura

*angolensis; rufostillans*

ogival, the anterior margin up-turned, smooth, with large and larger points mixed

*zambesianus*

rounded with a notch in the middle, the margin up-turned, smooth, with large points on sides and smaller ones in the middle

*viridiaereus; flexicornis*

rounded, with some large points mixed to smaller ones, the anterior margin up-turned

*schaufussi; zavattari; chrysoderus; rougonorum; lamtoensis; rolandoi; naevius*

rounded, the anterior margin up-turned, extremely smooth, some large and many small points

*delahayei; aequatus*

rounded, the margin slightly notched and up-turned anteriorly, a dense puncture on clypeus

*curtipilis*

slightly ogival, the anterior margin up-turned and slightly notched with many large and smaller points

*pendjarius*

slightly ogival, clypeus surface smooth, with some large points mixed to smaller ones, the anterior margin up-turned

*katanganus; ebenus; rufobasalis*

slightly triangular-shaped, anteriorly truncated, wrinkled, with some large points on clypeus surface

*saadaniensis*

triangular-shaped, the anterior margin up-turned, with many large and small points mixed

*jossoi*

triangular-shaped, the anterior margin markedly up-turned, smooth with few large points mixed to smaller ones

*macroliberianus; liberianus; pseudoliberianus*

triangular-shaped, the anterior margin truncated and up-turned, relatively wrinkled with some large points

*rufopygus*

male not seen

*hemichlorus*

## **vertex carina of female**

carina large, reaching the eyes, tricuspidal

*liberianus; pseudoliberianus*

elongate, triangular-shaped, large, almost reaching the eyes

*macroliberianus*

lamina very small, trapezoidal straight

*lamtoensis*

large, reaching the eyes, short, trapezoidal with the base large

*pendjarius; rolandoi; schaufussi; zavattari; katanganus*

large, rectangular, lowered

*jossoi*

large, superior margin tricuspidal

*delahayei*

narrow, small, the superior margin triangular-shaped

*curtipilis*

narrow, small, the superior margin tricuspidal, straight

*rufostillans; angolensis*

small, narrow, rounded

*zambesianus*

short lamina with the base large, almost reaching the eyes

*flexicornis*

short lamina with the base narrower (never reaching the eyes)

*chrysoderus*

small, never reaching the eyes, triangular-shaped, short

*rufopygus*

small pyramidal, placed near the hind margin

*saadaniensis*

small, narrow, short, trapezoidal-shaped, slightly concave

*ebenus, rufobasalis*

small, straight triangular-shape, the apex rounded

*viridiaereus*

small, trapezoidal, relatively narrow

*rougonorum*

small, tricuspidal, with the central apex higher than the side ones

*aequatus*

triangular, small up-turned

*hemichlorus*

tricuspidal, rather large, straight, narrow

*naevius*

## vertex carina of major male

almost ovalar lamina, carrying superiorly an arched cylindrical, short and straight expansion

*liberianus; macroliberianus; pseudoliberianus*

lamina elongate, trinagular-shaped rectilinear, the apex rounded, never carrying a cylindrical projection

*rufopygus*

lamina rectangular shaped, very short, then tapering into a triangle and carrying apically a cylindrical long and straight expansion

*lamtoensis*

lamina trapezoidal inverted , tapering to apex, carrying a long cyliindrical straight projection

*rolandoi; schaufussi; zavattari*

narrow, very small, never reaching the eyes, straight, elevated, truncated at apex

*rougonorum*

rectangular lamina but narrowed at the base, carrying superiorly an arched cylindrical expansion anteriorly turned

*angolensis; rufostillans; zambesianus*

rectangular lamina very narrow, with two pointed expansions on sides and a central straight, short protuberance

*jossoi*

rectangular lamina, carrying superiorly an arched cylindrical expansion anteriorly turned

*chrysoderus*

rectangular lamina, carrying superiorly an arched cylindrical, short and straight expansion

*flexicornis; katanganus*

rectangular, short , tapering to apex and carrying a cylindrical projection

*pendjarius; viridiaereus*

rectangular, straight, the apex rectilinear

*curtipilis*

rectangular-shaped, apically tapering and carrying a short rectilinear cylindrical projection

*naevius*

sinuate rectangular lamina, carrying superiorly an arched cylindrical expansion anteriorly turned

*aequatus*

sinuate rectangular lamina, in the distal third tapering into a triangle carrying superiorly an arched, small cylindrical expansion anteriorly turned

*ebenus; rufobasalis*

not seen

*delahayei; hemichlorus; saadaniensis*

## **Pronotum disc sculpture**

evident, relatively small, thick, ovalar granules

*ebenus*

evident, rounded, quite large granules, well spaced

*aequatus*

large ovalar evident granules relatively dense

*rufopygus*

large very thick granules

*saadaniensis*

large, evidente ovalar thick granules

*zambesianus*

large, thick granules

*chrysoderus*

many large points mixed with very small granules

*curtipilis*

rounded, evident granules, well spaced

*hemichlorus*

rounded, relatively dense granules

*rolandoi; schaufussi; zavattari*

rounded-ovalar, thick granules

*jossoi*

small, rounded thick granules

*naevius; pendjarius; liberianus; macroliberianus; pseudoliberianus*

small sparse granules

*angolensis; rufostillans*

many thick, small granules

*rougonorum*

thick, relatively large, ovalar granules

*rufobasalis*

thick, rounded granules

*delahayei; flexicornis; katanganus; lamtoensis; viridiaereus*

## female pronotum tubercles

absent

*rufopygus*

conical, evident, very close at base, the apices pointed

*hemichlorus*

conical, relatively large, parallel the apicex pointed

*viridiaereus*

conical, short, very close along the midline, rectilinear, the apex rounded

*flexicornis*, *lamtoensis* *pendjarius*

conical, straight, rectilinear

*delahayei*

conical, the apex rounded , parallel rectilinear

*rolandoi*

conical, the apex rounded , slightly diverging at apex

*schaufussi*; *zavattari*

reduced, rounded, very close, sometimes forming a unique line

*rougonorum*; *curtipilis*

conical, pointed, converging to the base

*ebenus*; *rufobasalis*

small conical, the apices pointed, close along the midline, the apices diverging

*zambesianus*; *angolensis*; *rufostillans*; *aequatus*

small, conical, rectilinear, the apices slightly diverging

*chrysoderus*

two conical, pointed, parallel, close to the midline

*liberianus*; *pseudoliberianus*; *macroliberianus*

two conical, small, parallel protuberances

*naevius*

two flat, rounded, expanded, rectilinear projections

*katanganus*

two rectilinear expansions, straight, very close, expanded, flat on sides

*jossoi*

two very expanded parallel laminae encircling a large smooth hollow

*saadaniensis*

## Elytral interstriae

evident, very dense granules, evenly distributed on the whole surface

*ebenus; rufobasalis*

extremely dense, relatively large granules, the surface quite rough

*pendjarius; rougonorum; viridiaereus*

extremely dense, small granules, the surface almost rough

*jossoi*

large, uniform flat granules, disposed in two rows

*lamtoensis; chrysoderus; curtipilis*

small but evident scattered granules, the first two interstriae almost smooth, the points larger and dense on sides

*hemichlorus*

small, evident, quite dense granules, evenly distributed on the whole surface

*liberianus; macroliberianus; pseudoliberianus*

small, uniform granules, disposed in two rows

*flexicornis; katanganus*

very small and sparse granules, the first interstria smooth, the point thicker on sides

*schaufussi; zavattari; aequatus; angolensis; delahayei; naevius; rufostillans; rolandoi*

very small granules, evenly distributed on the whole surface

*rufopygus*

very small, evident, regularly distributed in two rows granules

*zambesianus*

very thick granules, the surface extremely rough

*saadaniensis*
