# Supplementary material for: The Phylogenetic Relationships of Tiaronthophagus n.gen. (Coleoptera, Scarabaeidae, Onthophagini) Evaluated by Phenotypic Characters
Source: MDPI journal article supplement (doi:10.3390/insects10030064), 2019-03-01
Supplement: s1 [file s1]

## APPENDIX S3

### List of the synapomorphies common to the tree

**E. flavimargo:**

No autapomorphies

**M. pallens:**

Char. 0 - landmark  
 Char. 1 - landmark  
 Char. 2 - landmark  
 Char. 3 - landmark  
 Char. 4 - landmark  
 Char. 5 - landmark  
 Char. 6 - landmark  
 Char. 7 - landmark  
 Char. 9 - landmark  
 Char. 10 - landmark  
 Char. 11 - landmark  
 Char. 13: 0 --> 1  
 Char. 48: 2 --> 1  
 Char. 55: 2 --> 1  
 Char. 56: 1 --> 0

**H. bituberculatus:**

Char. 0 - landmark  
 Char. 1 - landmark  
 Char. 2 - landmark  
 Char. 3 - landmark  
 Char. 4 - landmark  
 Char. 5 - landmark  
 Char. 6 - landmark  
 Char. 7 - landmark  
 Char. 8 - landmark  
 Char. 9 - landmark  
 Char. 10 - landmark  
 Char. 11 - landmark

**H. depressus:**

Char. 0 - landmark  
 Char. 1 - landmark  
 Char. 2 - landmark  
 Char. 3 - landmark  
 Char. 4 - landmark  
 Char. 5 - landmark  
 Char. 6 - landmark  
 Char. 7 - landmark  
 Char. 8 - landmark  
 Char. 9 - landmark  
 Char. 10 - landmark  
 Char. 11 - landmark

**P. nuchicornis:**

Char. 0 - landmark  
 Char. 1 - landmark  
 Char. 3 - landmark  
 Char. 4 - landmark  
 Char. 8 - landmark  
 Char. 9 - landmark  
 Char. 11 - landmark

**O. nigriventris:**

Char. 0 - landmark  
 Char. 1 - landmark  
 Char. 2 - landmark  
 Char. 3 - landmark  
 Char. 4 - landmark  
 Char. 5 - landmark  
 Char. 6 - landmark  
 Char. 7 - landmark  
 Char. 8 - landmark  
 Char. 9 - landmark  
 Char. 10 - landmark  
 Char. 11 - landmark  
 Char. 48: 2 --> 1  
 Char. 51: 0 --> 1

**P. coenobita:**

Char. 0 - landmark  
 Char. 1 - landmark  
 Char. 2 - landmark  
 Char. 3 - landmark  
 Char. 4 - landmark  
 Char. 5 - landmark  
 Char. 6 - landmark  
 Char. 7 - landmark  
 Char. 8 - landmark  
 Char. 9 - landmark  
 Char. 10 - landmark  
 Char. 11 - landmark

**P. ovatus:**

Char. 0 - landmark  
 Char. 1 - landmark  
 Char. 2 - landmark  
 Char. 3 - landmark  
 Char. 4 - landmark  
 Char. 5 - landmark  
 Char. 6 - landmark  
 Char. 7 - landmark  
 Char. 8 - landmark  
 Char. 9 - landmark  
 Char. 10 - landmark  
 Char. 11 - landmark

**P. medius:**

Char. 0 - landmark  
 Char. 1 - landmark  
 Char. 2 - landmark  
 Char. 3 - landmark  
 Char. 4 - landmark  
 Char. 5 - landmark  
 Char. 6 - landmark  
 Char. 7 - landmark  
 Char. 8 - landmark  
 Char. 9 - landmark  
 Char. 10 - landmark  
 Char. 11 - landmark

*O. illyricus*:

Char. 0 - landmark  
 Char. 1 - landmark  
 Char. 2 - landmark  
 Char. 3 - landmark  
 Char. 4 - landmark  
 Char. 5 - landmark  
 Char. 6 - landmark  
 Char. 7 - landmark  
 Char. 8 - landmark  
 Char. 9 - landmark  
 Char. 10 - landmark  
 Char. 11 - landmark  
 Char. 14: 0 --> 1  
 Char. 49: 0 --> 4  
 Char. 53: 0 --> 1

*T. aequatus*:

Char. 0 - landmark  
 Char. 1 - landmark  
 Char. 2 - landmark  
 Char. 3 - landmark  
 Char. 4 - landmark  
 Char. 5 - landmark  
 Char. 6 - landmark  
 Char. 7 - landmark  
 Char. 9 - landmark  
 Char. 10 - landmark  
 Char. 11 - landmark  
 Char. 60: 2 --> 1

*T. angolensis*:

Char. 0 - landmark  
 Char. 1 - landmark  
 Char. 2 - landmark  
 Char. 3 - landmark  
 Char. 4 - landmark  
 Char. 5 - landmark  
 Char. 6 - landmark  
 Char. 7 - landmark  
 Char. 8 - landmark  
 Char. 9 - landmark  
 Char. 10 - landmark  
 Char. 11 - landmark

*T. chrysoderus*:

Char. 0 - landmark  
 Char. 1 - landmark  
 Char. 2 - landmark  
 Char. 3 - landmark  
 Char. 4 - landmark  
 Char. 5 - landmark  
 Char. 6 - landmark  
 Char. 7 - landmark  
 Char. 8 - landmark  
 Char. 9 - landmark  
 Char. 10 - landmark  
 Char. 11 - landmark  
 Char. 30: 1 --> 2  
 Char. 32: 0 --> 2  
 Char. 63: 2 --> 4

*T. curtipilis*:

Char. 0 - landmark  
 Char. 1 - landmark  
 Char. 2 - landmark  
 Char. 3 - landmark  
 Char. 4 - landmark  
 Char. 5 - landmark  
 Char. 6 - landmark  
 Char. 7 - landmark  
 Char. 8 - landmark  
 Char. 9 - landmark  
 Char. 10 - landmark  
 Char. 11 - landmark  
 Char. 37: 3 --> 4  
 Char. 49: 4 --> 5  
 Char. 59: 2 --> 3

*T. delahayei*:

Char. 0 - landmark  
 Char. 1 - landmark  
 Char. 2 - landmark  
 Char. 3 - landmark  
 Char. 4 - landmark  
 Char. 5 - landmark  
 Char. 6 - landmark  
 Char. 7 - landmark  
 Char. 8 - landmark  
 Char. 9 - landmark  
 Char. 10 - landmark  
 Char. 11 - landmark  
 Char. 31: 0 --> 2

*T. ebenus*:

Char. 0 - landmark  
 Char. 1 - landmark  
 Char. 2 - landmark  
 Char. 3 - landmark  
 Char. 4 - landmark  
 Char. 5 - landmark  
 Char. 6 - landmark  
 Char. 7 - landmark  
 Char. 8 - landmark  
 Char. 9 - landmark  
 Char. 10 - landmark  
 Char. 11 - landmark  
 Char. 30: 1 --> 2  
 Char. 63: 4 --> 3

*T. flexicornis*:

Char. 0 - landmark  
 Char. 1 - landmark  
 Char. 2 - landmark  
 Char. 3 - landmark  
 Char. 4 - landmark  
 Char. 5 - landmark  
 Char. 6 - landmark  
 Char. 7 - landmark  
 Char. 8 - landmark  
 Char. 9 - landmark  
 Char. 10 - landmark  
 Char. 11 - landmark  
 Char. 37: 3 --> 2

## T. hemichlorus:

Char. 0 - landmark  
 Char. 1 - landmark  
 Char. 3 - landmark  
 Char. 4 - landmark  
 Char. 8 - landmark  
 Char. 9 - landmark  
 Char. 11 - landmark  
 Char. 57: 0 --> 1  
 Char. 64: 0 --> 1

Char. 6 - landmark  
 Char. 7 - landmark  
 Char. 8 - landmark  
 Char. 9 - landmark  
 Char. 10 - landmark  
 Char. 11 - landmark  
 Char. 16: 0 --> 1  
 Char. 21: 2 --> 3

## T. katanganus:

Char. 0 - landmark  
 Char. 1 - landmark  
 Char. 2 - landmark  
 Char. 3 - landmark  
 Char. 4 - landmark  
 Char. 5 - landmark  
 Char. 6 - landmark  
 Char. 7 - landmark  
 Char. 8 - landmark  
 Char. 9 - landmark  
 Char. 10 - landmark  
 Char. 11 - landmark  
 Char. 38: 1 --> 0  
 Char. 54: 0 --> 3  
 Char. 64: 0 --> 1

## T. naevius:

Char. 0 - landmark  
 Char. 1 - landmark  
 Char. 2 - landmark  
 Char. 3 - landmark  
 Char. 4 - landmark  
 Char. 5 - landmark  
 Char. 6 - landmark  
 Char. 7 - landmark  
 Char. 8 - landmark  
 Char. 9 - landmark  
 Char. 10 - landmark  
 Char. 11 - landmark  
 Char. 60: 2 --> 3

## T. lamtoensis:

Char. 0 - landmark  
 Char. 1 - landmark  
 Char. 2 - landmark  
 Char. 3 - landmark  
 Char. 4 - landmark  
 Char. 5 - landmark  
 Char. 6 - landmark  
 Char. 7 - landmark  
 Char. 8 - landmark  
 Char. 9 - landmark  
 Char. 10 - landmark  
 Char. 11 - landmark

## T. pendjarius:

Char. 0 - landmark  
 Char. 1 - landmark  
 Char. 2 - landmark  
 Char. 3 - landmark  
 Char. 4 - landmark  
 Char. 5 - landmark  
 Char. 6 - landmark  
 Char. 7 - landmark  
 Char. 8 - landmark  
 Char. 9 - landmark  
 Char. 10 - landmark  
 Char. 11 - landmark  
 Char. 17: 1 --> 0  
 Char. 44: 4 --> 3  
 Char. 49: 4 --> 6

## T. liberianus:

Char. 0 - landmark  
 Char. 1 - landmark  
 Char. 2 - landmark  
 Char. 3 - landmark  
 Char. 4 - landmark  
 Char. 5 - landmark  
 Char. 6 - landmark  
 Char. 7 - landmark  
 Char. 8 - landmark  
 Char. 9 - landmark  
 Char. 10 - landmark  
 Char. 11 - landmark

## T. pseudoliberianus:

Char. 0 - landmark  
 Char. 1 - landmark  
 Char. 2 - landmark  
 Char. 3 - landmark  
 Char. 4 - landmark  
 Char. 5 - landmark  
 Char. 6 - landmark  
 Char. 7 - landmark  
 Char. 8 - landmark  
 Char. 9 - landmark  
 Char. 10 - landmark  
 Char. 11 - landmark

## T. macroliberianus:

Char. 0 - landmark  
 Char. 1 - landmark  
 Char. 2 - landmark  
 Char. 3 - landmark  
 Char. 4 - landmark  
 Char. 5 - landmark

## T. rougonorum:

Char. 0 - landmark  
 Char. 1 - landmark  
 Char. 2 - landmark  
 Char. 3 - landmark  
 Char. 4 - landmark  
 Char. 5 - landmark  
 Char. 6 - landmark

Char. 7 - landmark  
 Char. 8 - landmark  
 Char. 9 - landmark  
 Char. 10 - landmark  
 Char. 11 - landmark  
 Char. 60: 2 --> 3

T. rufobasalis:

Char. 0 - landmark  
 Char. 1 - landmark  
 Char. 2 - landmark  
 Char. 3 - landmark  
 Char. 4 - landmark  
 Char. 5 - landmark  
 Char. 6 - landmark  
 Char. 7 - landmark  
 Char. 8 - landmark  
 Char. 9 - landmark  
 Char. 10 - landmark  
 Char. 11 - landmark  
 Char. 26: 1 --> 3  
 Char. 59: 3 --> 2  
 Char. 62: 2 --> 0

T. rufopygus:

Char. 0 - landmark  
 Char. 1 - landmark  
 Char. 2 - landmark  
 Char. 3 - landmark  
 Char. 4 - landmark  
 Char. 5 - landmark  
 Char. 6 - landmark  
 Char. 7 - landmark  
 Char. 8 - landmark  
 Char. 9 - landmark  
 Char. 10 - landmark  
 Char. 11 - landmark  
 Char. 46: 2 --> 3

T. rufostillans:

Char. 0 - landmark  
 Char. 1 - landmark  
 Char. 2 - landmark  
 Char. 3 - landmark  
 Char. 4 - landmark  
 Char. 5 - landmark  
 Char. 6 - landmark  
 Char. 7 - landmark  
 Char. 8 - landmark  
 Char. 9 - landmark  
 Char. 10 - landmark  
 Char. 11 - landmark  
 Char. 38: 0 --> 1

T. schaufussi:

Char. 0 - landmark  
 Char. 1 - landmark  
 Char. 2 - landmark  
 Char. 3 - landmark  
 Char. 4 - landmark  
 Char. 5 - landmark  
 Char. 6 - landmark  
 Char. 7 - landmark

Char. 8 - landmark  
 Char. 9 - landmark  
 Char. 10 - landmark  
 Char. 11 - landmark  
 Char. 17: 1 --> 0  
 Char. 38: 0 --> 1

T. viridiaereus:

Char. 0 - landmark  
 Char. 1 - landmark  
 Char. 2 - landmark  
 Char. 3 - landmark  
 Char. 4 - landmark  
 Char. 5 - landmark  
 Char. 6 - landmark  
 Char. 7 - landmark  
 Char. 8 - landmark  
 Char. 9 - landmark  
 Char. 10 - landmark  
 Char. 11 - landmark  
 Char. 14: 0 --> 2

T. zambesianus:

Char. 0 - landmark  
 Char. 1 - landmark  
 Char. 2 - landmark  
 Char. 3 - landmark  
 Char. 4 - landmark  
 Char. 5 - landmark  
 Char. 6 - landmark  
 Char. 7 - landmark  
 Char. 9 - landmark  
 Char. 10 - landmark  
 Char. 11 - landmark  
 Char. 29: 3 --> 2

T. zavattarii:

Char. 0 - landmark  
 Char. 1 - landmark  
 Char. 2 - landmark  
 Char. 3 - landmark  
 Char. 4 - landmark  
 Char. 5 - landmark  
 Char. 6 - landmark  
 Char. 7 - landmark  
 Char. 8 - landmark  
 Char. 9 - landmark  
 Char. 10 - landmark  
 Char. 11 - landmark  
 Char. 26: 1 --> 3

T. rolandoi:

Char. 0 - landmark  
 Char. 1 - landmark  
 Char. 2 - landmark  
 Char. 3 - landmark  
 Char. 4 - landmark  
 Char. 5 - landmark  
 Char. 6 - landmark  
 Char. 7 - landmark  
 Char. 8 - landmark  
 Char. 9 - landmark  
 Char. 10 - landmark

Char. 11 - landmark

T. jossoi:

Char. 0 - landmark  
 Char. 1 - landmark  
 Char. 2 - landmark  
 Char. 3 - landmark  
 Char. 4 - landmark  
 Char. 5 - landmark  
 Char. 6 - landmark  
 Char. 7 - landmark  
 Char. 8 - landmark  
 Char. 9 - landmark  
 Char. 10 - landmark  
 Char. 11 - landmark  
 Char. 41: 0 --> 2

T. saadaniensis:

Char. 0 - landmark  
 Char. 1 - landmark  
 Char. 2 - landmark  
 Char. 3 - landmark  
 Char. 4 - landmark  
 Char. 5 - landmark  
 Char. 6 - landmark  
 Char. 7 - landmark  
 Char. 9 - landmark  
 Char. 10 - landmark  
 Char. 11 - landmark  
 Char. 12: 1 --> 2  
 Char. 13: 1 --> 0  
 Char. 21: 2 --> 3  
 Char. 26: 4 --> 3  
 Char. 27: 0 --> 1  
 Char. 28: 1 --> 0  
 Char. 29: 3 --> 2  
 Char. 59: 2 --> 3

Node 37:

Char. 0 - landmark  
 Char. 1 - landmark  
 Char. 2 - landmark  
 Char. 3 - landmark  
 Char. 4 - landmark  
 Char. 5 - landmark  
 Char. 6 - landmark  
 Char. 7 - landmark  
 Char. 8 - landmark  
 Char. 9 - landmark  
 Char. 10 - landmark  
 Char. 11 - landmark  
 Char. 14: 0 --> 1  
 Char. 27: 0 --> 1  
 Char. 29: 0 --> 1  
 Char. 34: 1 --> 0  
 Char. 39: 0 --> 1  
 Char. 41: 0 --> 1  
 Char. 45: 0 --> 1  
 Char. 62: 0 --> 1

Node 38:

Char. 0 - landmark  
 Char. 1 - landmark

Char. 2 - landmark  
 Char. 3 - landmark  
 Char. 4 - landmark  
 Char. 5 - landmark  
 Char. 6 - landmark  
 Char. 7 - landmark  
 Char. 8 - landmark  
 Char. 9 - landmark  
 Char. 10 - landmark  
 Char. 25: 0 --> 1

Node 39:

Char. 0 - landmark  
 Char. 1 - landmark  
 Char. 2 - landmark  
 Char. 3 - landmark  
 Char. 4 - landmark  
 Char. 5 - landmark  
 Char. 6 - landmark  
 Char. 7 - landmark  
 Char. 8 - landmark  
 Char. 9 - landmark  
 Char. 10 - landmark  
 Char. 11 - landmark  
 Char. 55: 0 --> 2  
 Char. 56: 0 --> 1  
 Char. 58: 0 --> 2

Node 40:

Char. 0 - landmark  
 Char. 1 - landmark  
 Char. 2 - landmark  
 Char. 3 - landmark  
 Char. 4 - landmark  
 Char. 5 - landmark  
 Char. 6 - landmark  
 Char. 7 - landmark  
 Char. 8 - landmark  
 Char. 9 - landmark  
 Char. 10 - landmark  
 Char. 11 - landmark

Node 41:

Char. 0 - landmark  
 Char. 1 - landmark  
 Char. 2 - landmark  
 Char. 3 - landmark  
 Char. 4 - landmark  
 Char. 5 - landmark  
 Char. 6 - landmark  
 Char. 7 - landmark  
 Char. 8 - landmark  
 Char. 9 - landmark  
 Char. 10 - landmark  
 Char. 11 - landmark  
 Char. 23: 0 --> 1  
 Char. 63: 0 --> 6

Node 42:

Char. 0 - landmark  
 Char. 1 - landmark  
 Char. 2 - landmark  
 Char. 3 - landmark

Char. 4 - landmark  
 Char. 5 - landmark  
 Char. 6 - landmark  
 Char. 7 - landmark  
 Char. 8 - landmark  
 Char. 9 - landmark  
 Char. 10 - landmark  
 Char. 11 - landmark

Node 43:

Char. 0 - landmark  
 Char. 1 - landmark  
 Char. 2 - landmark  
 Char. 3 - landmark  
 Char. 4 - landmark  
 Char. 5 - landmark  
 Char. 6 - landmark  
 Char. 7 - landmark  
 Char. 8 - landmark  
 Char. 9 - landmark  
 Char. 11 - landmark  
 Char. 38: 0 --> 1  
 Char. 53: 0 --> 1

Node 44:

Char. 0 - landmark  
 Char. 1 - landmark  
 Char. 2 - landmark  
 Char. 3 - landmark  
 Char. 4 - landmark  
 Char. 5 - landmark  
 Char. 6 - landmark  
 Char. 7 - landmark  
 Char. 8 - landmark  
 Char. 9 - landmark  
 Char. 10 - landmark  
 Char. 11 - landmark  
 Char. 17: 0 --> 1  
 Char. 21: 0 --> 1  
 Char. 47: 0 --> 2  
 Char. 62: 0 --> 2  
 Char. 63: 0 --> 1

Node 45:

Char. 0 - landmark  
 Char. 1 - landmark  
 Char. 2 - landmark  
 Char. 3 - landmark  
 Char. 4 - landmark  
 Char. 5 - landmark  
 Char. 6 - landmark  
 Char. 7 - landmark  
 Char. 8 - landmark  
 Char. 9 - landmark  
 Char. 10 - landmark  
 Char. 11 - landmark  
 Char. 46: 0 --> 2

Node 46:

Char. 0 - landmark  
 Char. 1 - landmark  
 Char. 2 - landmark  
 Char. 3 - landmark

Char. 4 - landmark  
 Char. 5 - landmark  
 Char. 6 - landmark  
 Char. 7 - landmark  
 Char. 8 - landmark  
 Char. 9 - landmark  
 Char. 10 - landmark  
 Char. 11 - landmark  
 Char. 27: 0 --> 1  
 Char. 37: 4 --> 2  
 Char. 62: 2 --> 0  
 Char. 64: 0 --> 1

Node 47:

Char. 0 - landmark  
 Char. 1 - landmark  
 Char. 2 - landmark  
 Char. 3 - landmark  
 Char. 4 - landmark  
 Char. 5 - landmark  
 Char. 6 - landmark  
 Char. 7 - landmark  
 Char. 8 - landmark  
 Char. 9 - landmark  
 Char. 10 - landmark  
 Char. 38: 1 --> 0  
 Char. 59: 3 --> 2

Node 48:

Char. 0 - landmark  
 Char. 1 - landmark  
 Char. 2 - landmark  
 Char. 3 - landmark  
 Char. 4 - landmark  
 Char. 5 - landmark  
 Char. 6 - landmark  
 Char. 7 - landmark  
 Char. 8 - landmark  
 Char. 10 - landmark  
 Char. 11 - landmark  
 Char. 49: 4 --> 3  
 Char. 60: 3 --> 2

Node 49:

Char. 0 - landmark  
 Char. 1 - landmark  
 Char. 2 - landmark  
 Char. 3 - landmark  
 Char. 4 - landmark  
 Char. 5 - landmark  
 Char. 6 - landmark  
 Char. 7 - landmark  
 Char. 8 - landmark  
 Char. 9 - landmark  
 Char. 10 - landmark  
 Char. 11 - landmark  
 Char. 12: 2 --> 1  
 Char. 29: 0 --> 3  
 Char. 36: 1 --> 0  
 Char. 37: 3 --> 4  
 Char. 44: 4 --> 2  
 Char. 57: 0 --> 1

## Node 50:

Char. 0 - landmark  
 Char. 1 - landmark  
 Char. 2 - landmark  
 Char. 3 - landmark  
 Char. 4 - landmark  
 Char. 5 - landmark  
 Char. 6 - landmark  
 Char. 7 - landmark  
 Char. 8 - landmark  
 Char. 9 - landmark  
 Char. 10 - landmark  
 Char. 11 - landmark  
 Char. 15: 1 --> 0  
 Char. 18: 1 --> 2  
 Char. 32: 0 --> 1  
 Char. 62: 0 --> 2  
 Char. 63: 2 --> 4

## Node 51:

Char. 0 - landmark  
 Char. 1 - landmark  
 Char. 2 - landmark  
 Char. 3 - landmark  
 Char. 4 - landmark  
 Char. 5 - landmark  
 Char. 6 - landmark  
 Char. 7 - landmark  
 Char. 8 - landmark  
 Char. 9 - landmark  
 Char. 10 - landmark  
 Char. 11 - landmark  
 Char. 60: 2 --> 3

## Node 52:

Char. 0 - landmark  
 Char. 1 - landmark  
 Char. 2 - landmark  
 Char. 3 - landmark  
 Char. 4 - landmark  
 Char. 5 - landmark  
 Char. 6 - landmark  
 Char. 7 - landmark  
 Char. 8 - landmark  
 Char. 9 - landmark  
 Char. 10 - landmark  
 Char. 11 - landmark  
 Char. 21: 0 --> 1  
 Char. 38: 0 --> 1  
 Char. 49: 5 --> 4

## Node 53:

Char. 0 - landmark  
 Char. 1 - landmark  
 Char. 2 - landmark  
 Char. 3 - landmark  
 Char. 4 - landmark  
 Char. 5 - landmark  
 Char. 6 - landmark  
 Char. 7 - landmark  
 Char. 8 - landmark  
 Char. 9 - landmark  
 Char. 10 - landmark

Char. 11 - landmark  
 Char. 17: 0 --> 1

## Node 54:

Char. 0 - landmark  
 Char. 1 - landmark  
 Char. 2 - landmark  
 Char. 3 - landmark  
 Char. 4 - landmark  
 Char. 5 - landmark  
 Char. 6 - landmark  
 Char. 7 - landmark  
 Char. 8 - landmark  
 Char. 9 - landmark  
 Char. 10 - landmark  
 Char. 11 - landmark  
 Char. 12: 0 --> 2  
 Char. 15: 0 --> 1  
 Char. 18: 0 --> 1  
 Char. 19: 0 --> 1  
 Char. 24: 0 --> 1  
 Char. 26: 0 --> 2  
 Char. 28: 0 --> 1  
 Char. 30: 0 --> 1  
 Char. 33: 0 --> 1  
 Char. 42: 0 --> 1  
 Char. 46: 0 --> 2  
 Char. 47: 0 --> 1  
 Char. 50: 1 --> 2  
 Char. 51: 0 --> 2  
 Char. 52: 0 --> 1  
 Char. 53: 0 --> 2  
 Char. 60: 0 --> 2  
 Char. 61: 0 --> 2  
 Char. 63: 0 --> 2

## Node 55:

Char. 0 - landmark  
 Char. 1 - landmark  
 Char. 2 - landmark  
 Char. 3 - landmark  
 Char. 4 - landmark  
 Char. 5 - landmark  
 Char. 6 - landmark  
 Char. 7 - landmark  
 Char. 8 - landmark  
 Char. 9 - landmark  
 Char. 10 - landmark  
 Char. 11 - landmark  
 Char. 29: 3 --> 2

## Node 56:

Char. 0 - landmark  
 Char. 1 - landmark  
 Char. 2 - landmark  
 Char. 3 - landmark  
 Char. 4 - landmark  
 Char. 5 - landmark  
 Char. 6 - landmark  
 Char. 7 - landmark  
 Char. 8 - landmark  
 Char. 9 - landmark  
 Char. 10 - landmark

Char. 11 - landmark  
Char. 13: 1 --> 0

Node 57:

Char. 0 - landmark  
Char. 1 - landmark  
Char. 2 - landmark  
Char. 3 - landmark  
Char. 4 - landmark  
Char. 5 - landmark  
Char. 6 - landmark  
Char. 7 - landmark  
Char. 8 - landmark  
Char. 9 - landmark  
Char. 10 - landmark  
Char. 11 - landmark  
Char. 32: 0 --> 2  
Char. 44: 4 --> 5

Node 58:

Char. 0 - landmark  
Char. 1 - landmark  
Char. 2 - landmark  
Char. 3 - landmark  
Char. 4 - landmark  
Char. 5 - landmark  
Char. 6 - landmark  
Char. 7 - landmark  
Char. 8 - landmark  
Char. 9 - landmark  
Char. 10 - landmark  
Char. 11 - landmark  
Char. 36: 1 --> 0

Node 59:

Char. 0 - landmark  
Char. 1 - landmark  
Char. 2 - landmark  
Char. 3 - landmark  
Char. 4 - landmark  
Char. 5 - landmark  
Char. 6 - landmark  
Char. 7 - landmark  
Char. 8 - landmark  
Char. 10 - landmark  
Char. 11 - landmark  
Char. 59: 3 --> 2

Node 60:

Char. 0 - landmark  
Char. 1 - landmark  
Char. 2 - landmark  
Char. 3 - landmark  
Char. 4 - landmark  
Char. 5 - landmark  
Char. 6 - landmark  
Char. 7 - landmark  
Char. 8 - landmark  
Char. 9 - landmark  
Char. 10 - landmark  
Char. 11 - landmark  
Char. 44: 2 --> 3  
Char. 54: 0 --> 2

Node 61:

Char. 0 - landmark  
Char. 1 - landmark  
Char. 2 - landmark  
Char. 3 - landmark  
Char. 4 - landmark  
Char. 5 - landmark  
Char. 6 - landmark  
Char. 7 - landmark  
Char. 8 - landmark  
Char. 9 - landmark  
Char. 10 - landmark  
Char. 11 - landmark  
Char. 37: 4 --> 2

Node 62:

Char. 0 - landmark  
Char. 1 - landmark  
Char. 2 - landmark  
Char. 3 - landmark  
Char. 4 - landmark  
Char. 5 - landmark  
Char. 6 - landmark  
Char. 7 - landmark  
Char. 8 - landmark  
Char. 9 - landmark  
Char. 10 - landmark  
Char. 11 - landmark  
Char. 17: 1 --> 0

Node 63:

Char. 0 - landmark  
Char. 1 - landmark  
Char. 2 - landmark  
Char. 3 - landmark  
Char. 4 - landmark  
Char. 5 - landmark  
Char. 6 - landmark  
Char. 7 - landmark  
Char. 8 - landmark  
Char. 9 - landmark  
Char. 10 - landmark  
Char. 11 - landmark

Node 64:

Char. 0 - landmark  
Char. 1 - landmark  
Char. 2 - landmark  
Char. 3 - landmark  
Char. 4 - landmark  
Char. 5 - landmark  
Char. 6 - landmark  
Char. 7 - landmark  
Char. 8 - landmark  
Char. 9 - landmark  
Char. 10 - landmark  
Char. 11 - landmark  
Char. 37: 4 --> 5  
Char. 38: 0 --> 2

Node 65:

Char. 0 - landmark



Char. 1 - landmark  
 Char. 2 - landmark  
 Char. 3 - landmark  
 Char. 4 - landmark  
 Char. 5 - landmark  
 Char. 6 - landmark  
 Char. 7 - landmark  
 Char. 8 - landmark  
 Char. 9 - landmark  
 Char. 10 - landmark  
 Char. 11 - landmark  
 Char. 60: 2 --> 1

Node 66:

Char. 0 - landmark  
 Char. 1 - landmark  
 Char. 2 - landmark  
 Char. 3 - landmark  
 Char. 4 - landmark  
 Char. 5 - landmark  
 Char. 6 - landmark  
 Char. 7 - landmark  
 Char. 8 - landmark  
 Char. 9 - landmark  
 Char. 10 - landmark  
 Char. 11 - landmark  
 Char. 14: 0 --> 2  
 Char. 15: 0 --> 1  
 Char. 16: 1 --> 0  
 Char. 21: 1 --> 2  
 Char. 26: 1 --> 4  
 Char. 31: 0 --> 1  
 Char. 42: 1 --> 0  
 Char. 63: 4 --> 3

Node 67:

Char. 0 - landmark  
 Char. 1 - landmark  
 Char. 2 - landmark  
 Char. 3 - landmark  
 Char. 4 - landmark  
 Char. 5 - landmark

Char. 6 - landmark  
 Char. 7 - landmark  
 Char. 8 - landmark  
 Char. 9 - landmark  
 Char. 10 - landmark  
 Char. 11 - landmark  
 Char. 51: 2 --> 0  
 Char. 57: 1 --> 0

Node 68:

Char. 0 - landmark  
 Char. 1 - landmark  
 Char. 2 - landmark  
 Char. 3 - landmark  
 Char. 4 - landmark  
 Char. 5 - landmark  
 Char. 6 - landmark  
 Char. 7 - landmark  
 Char. 8 - landmark  
 Char. 9 - landmark  
 Char. 10 - landmark  
 Char. 11 - landmark

Node 69:

Char. 0 - landmark  
 Char. 1 - landmark  
 Char. 2 - landmark  
 Char. 3 - landmark  
 Char. 4 - landmark  
 Char. 5 - landmark  
 Char. 6 - landmark  
 Char. 7 - landmark  
 Char. 8 - landmark  
 Char. 9 - landmark  
 Char. 10 - landmark  
 Char. 11 - landmark  
 Char. 30: 2 --> 1  
 Char. 37: 2 --> 4  
 Char. 44: 0 --> 1  
 Char. 49: 3 --> 4  
 Char. 54: 0 --> 1
