# Supplementary material for: The Phylogenetic Relationships of Tiaronthophagus n.gen. (Coleoptera, Scarabaeidae, Onthophagini) Evaluated by Phenotypic Characters
Source: MDPI journal article supplement (doi:10.3390/insects10030064), 2019-03-01
Supplement: s1 [file s1]

Paramere

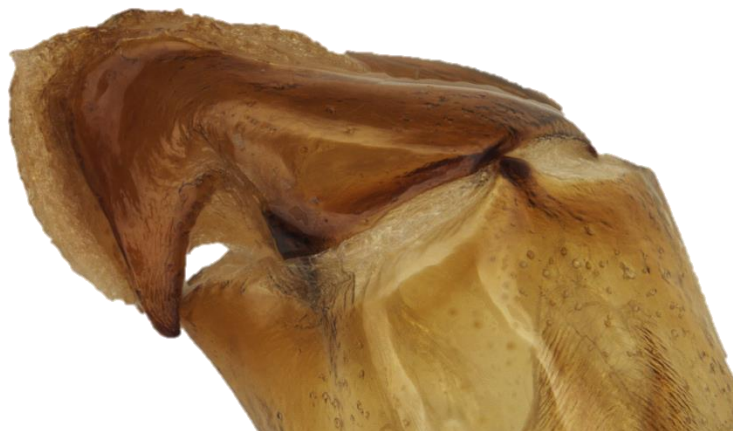

*aequatus*

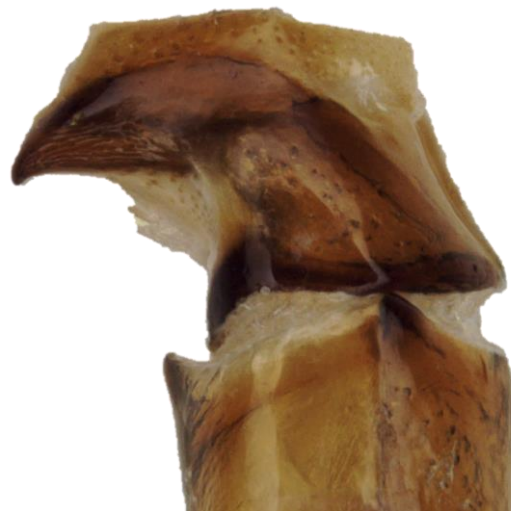

*chrysoderus*

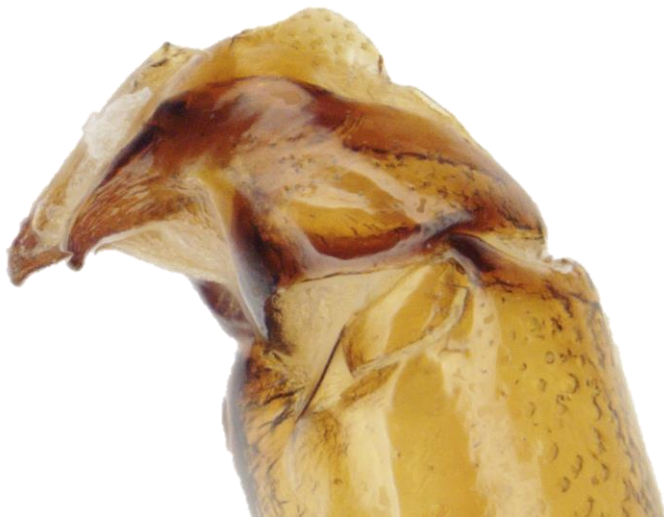

*curtipilis*

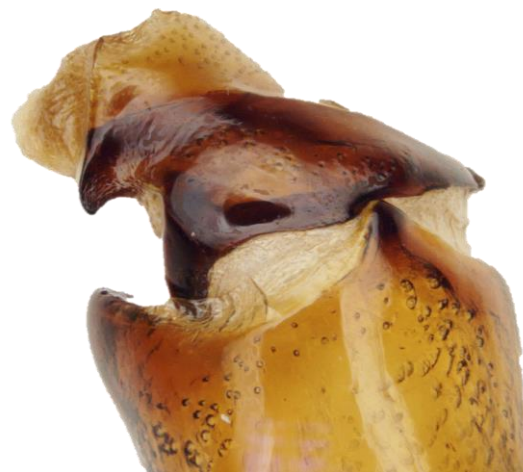

*delahayei*

Paramere

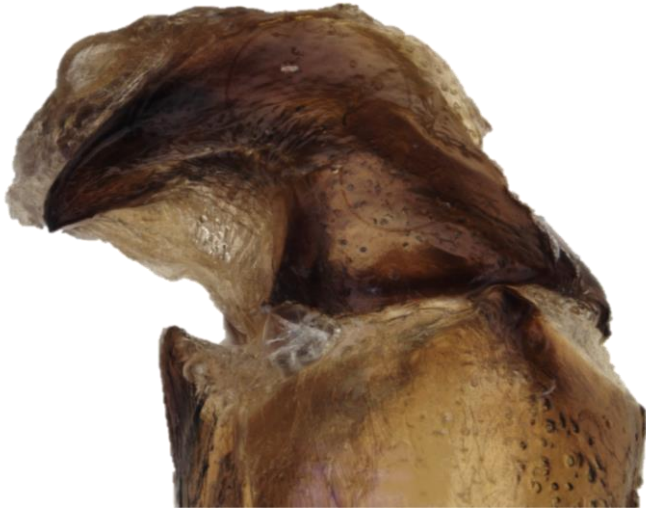

*ebenus*

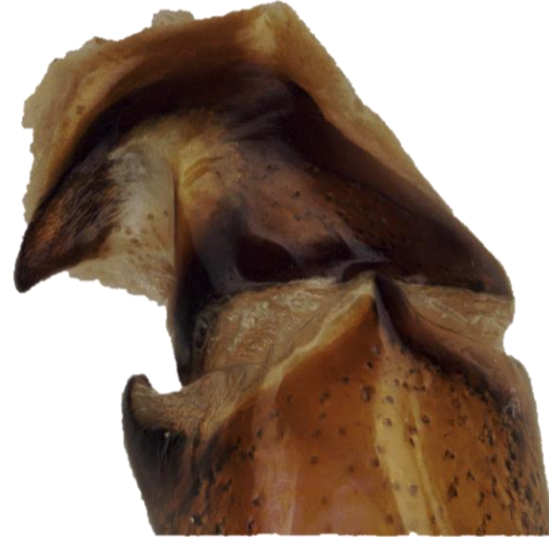

*flexicornis*

**MALE MISSING**

*hemichlorus*

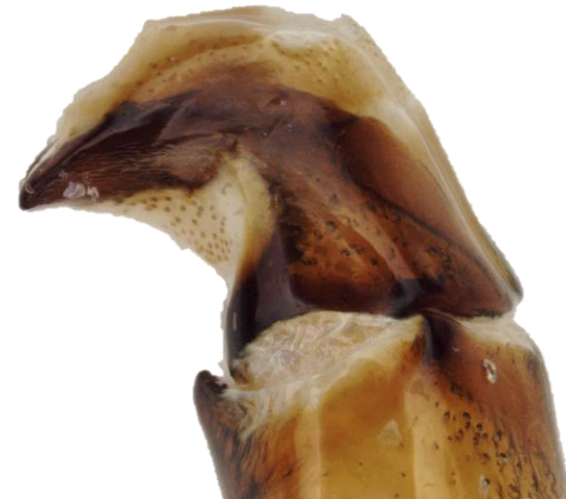

*lamtoensis*

Paramere

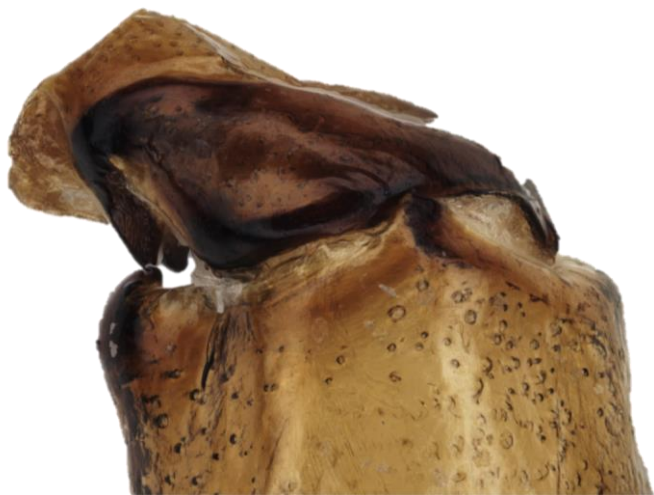

*liberianus*

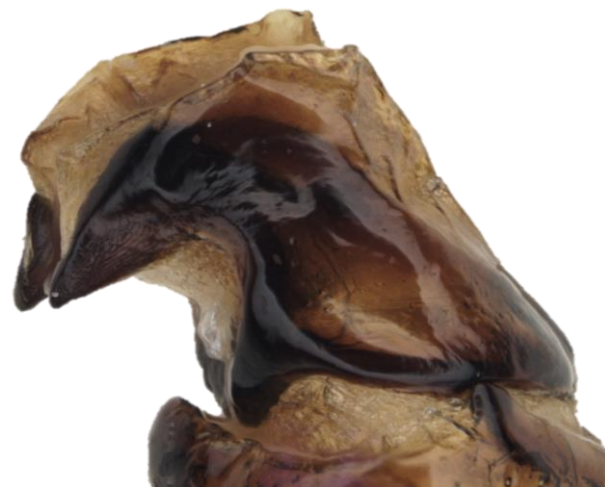

*macroliberianus*

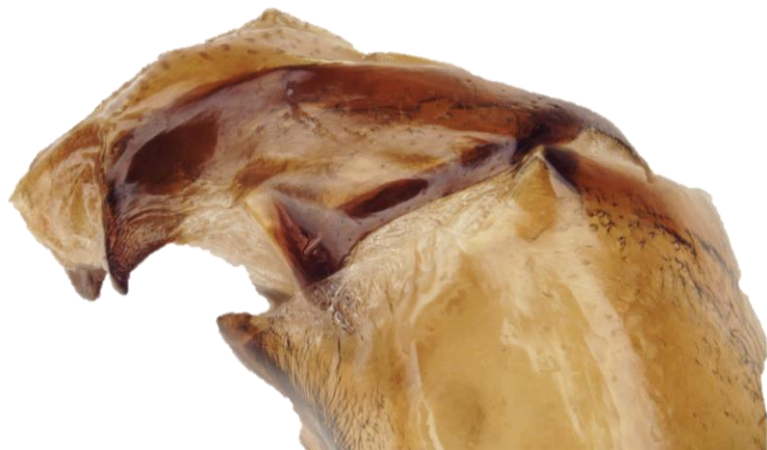

*naevius*

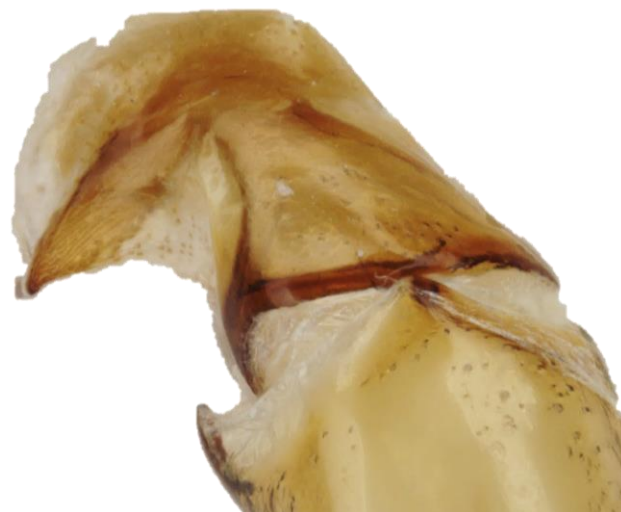

*pendjarius*



Paramere

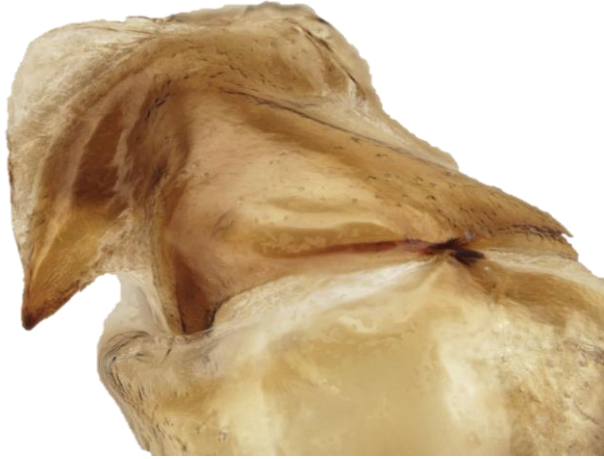

*pseudolibertianus*

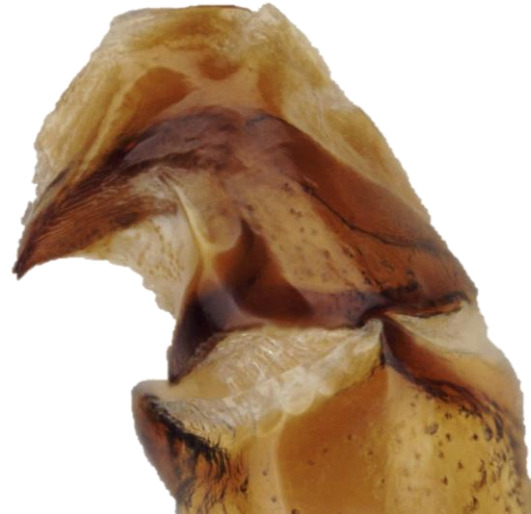

*rougonorum*

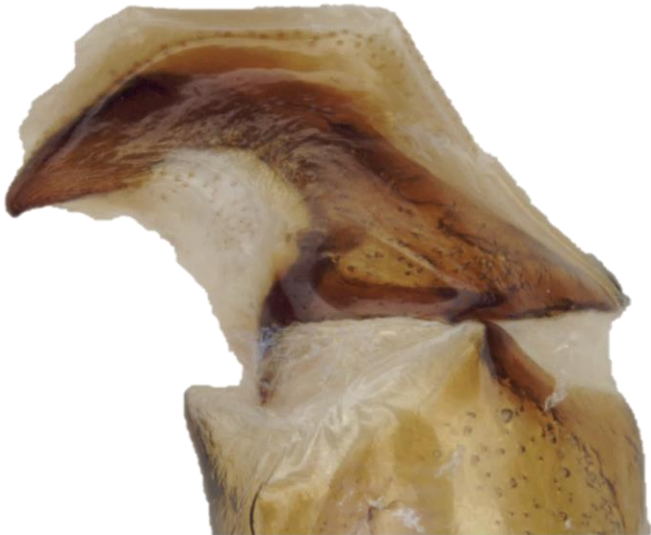

*rufobasalis*

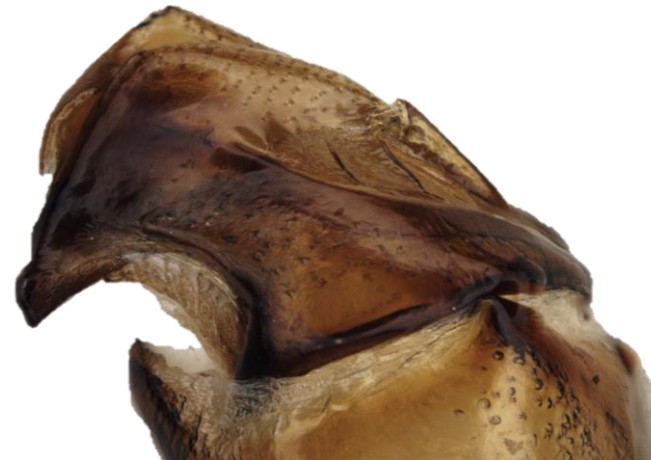

*rufopygus*

Paramere

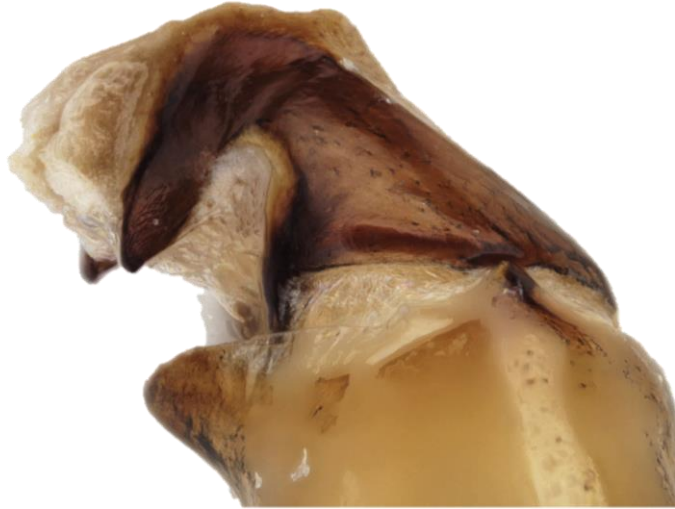

*rufostillans*

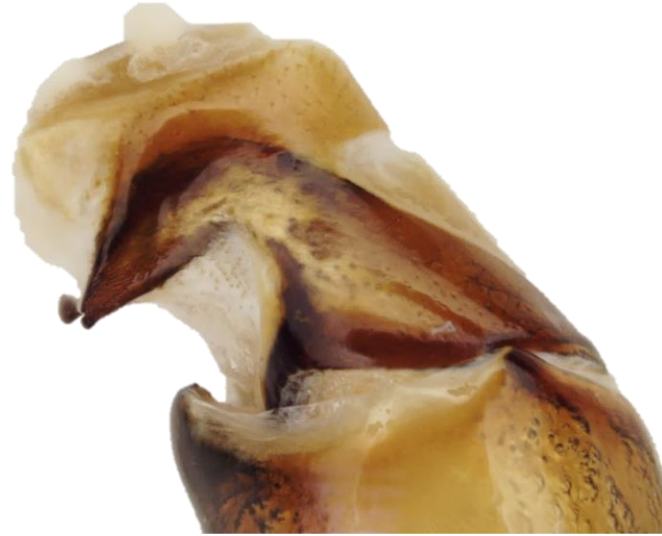

*schaufussi*

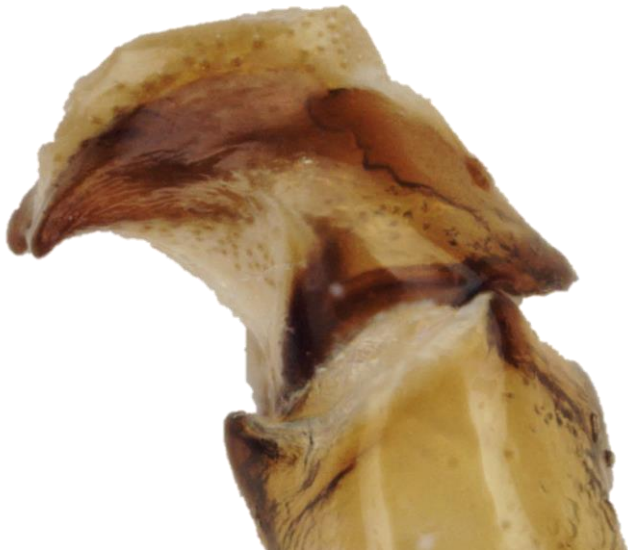

*viridiaereus*

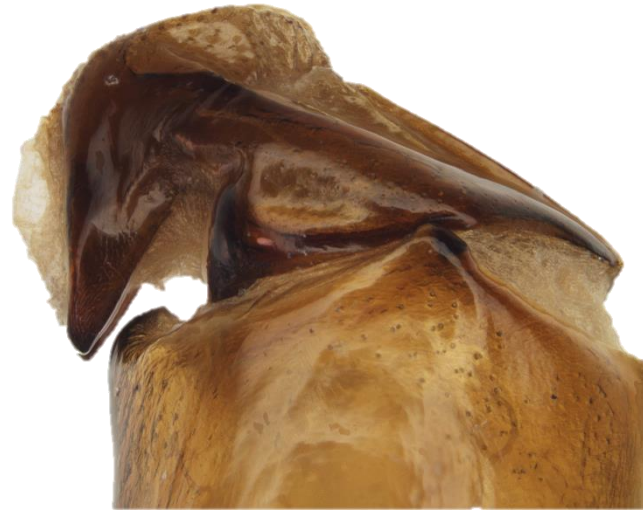

*zavattarii*

Paramere

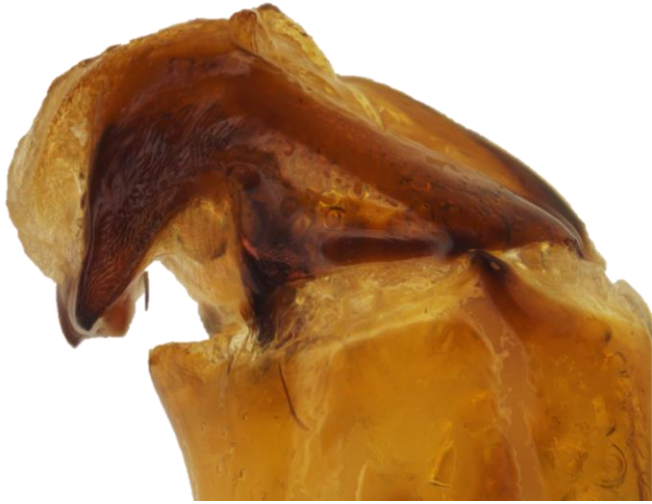

*angolensis*

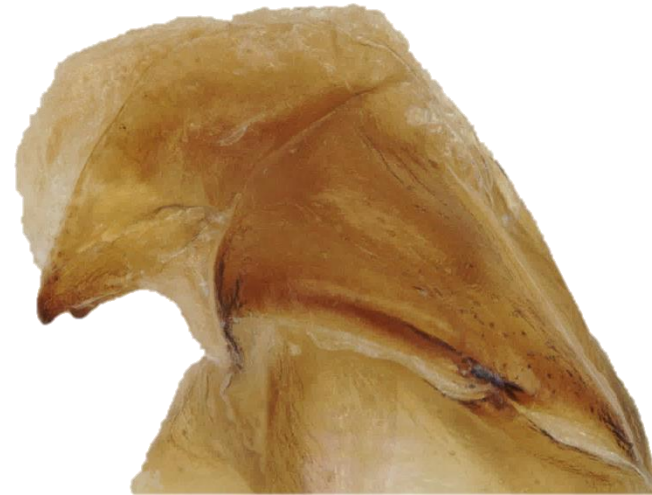

*jossoi*

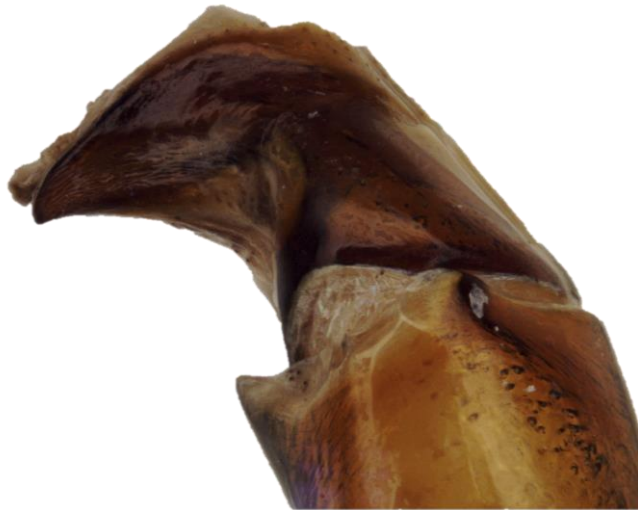

*katanganus*

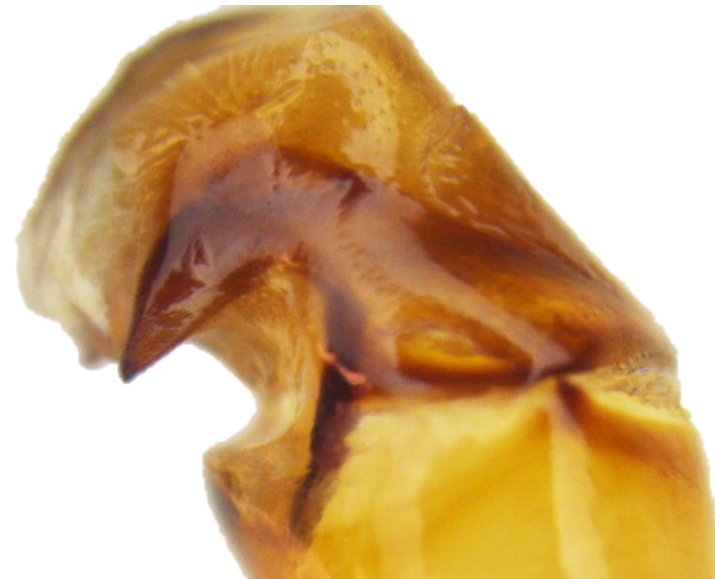

*rolandoi*

Paramere

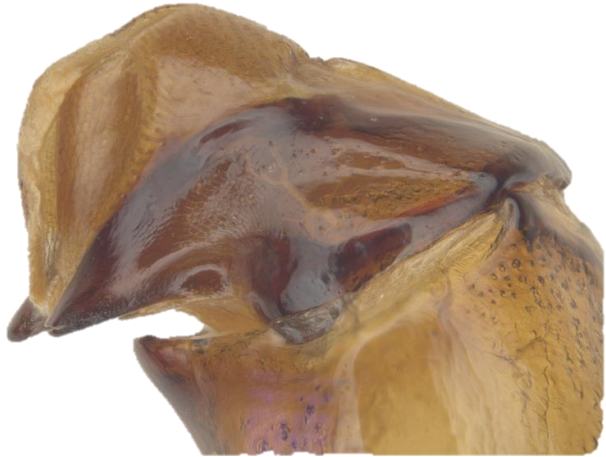

*saadaniensis*

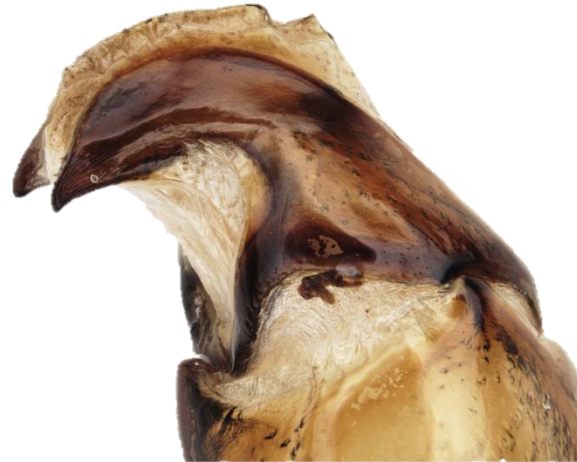

*zambesianus*



Lamella copulatrix

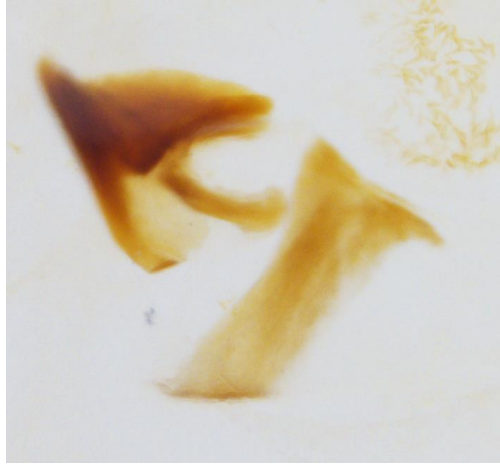

***aequatus***

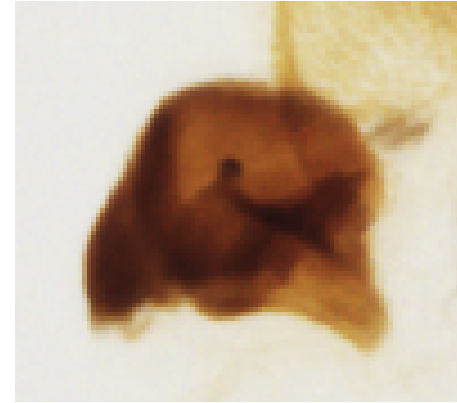

***chrysoderus***

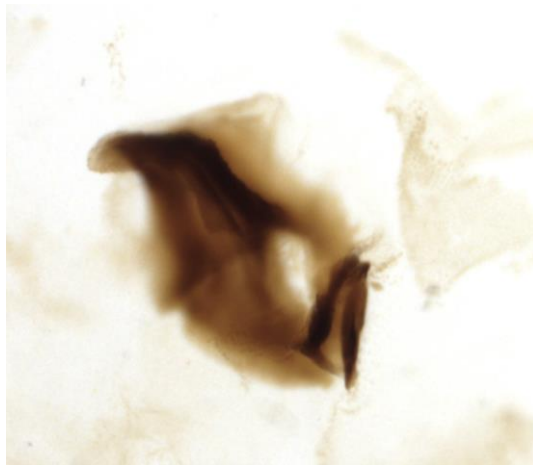

***curtipilis***

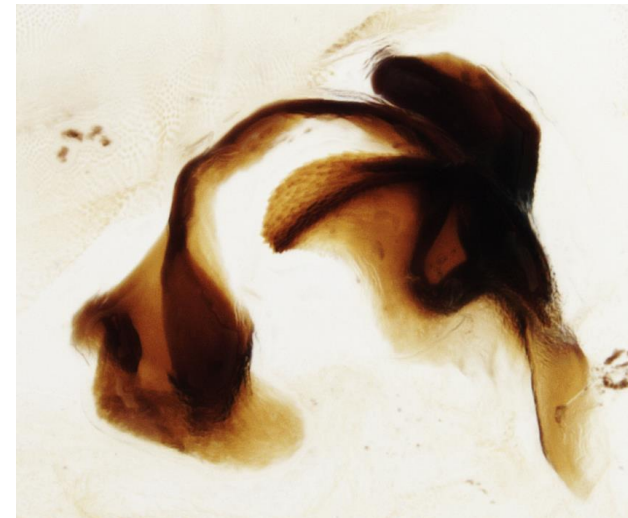

***delahayei***



Lamella copulatrix

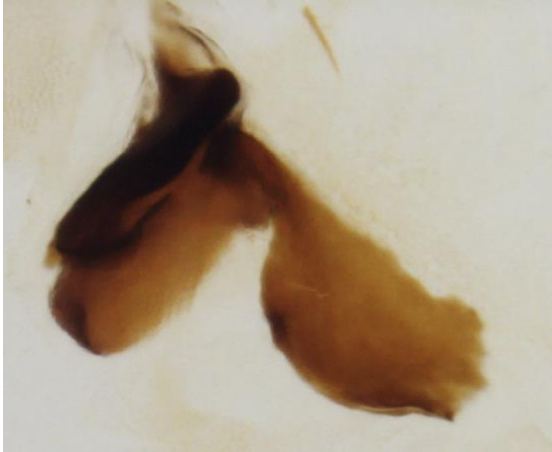

*ebenus*

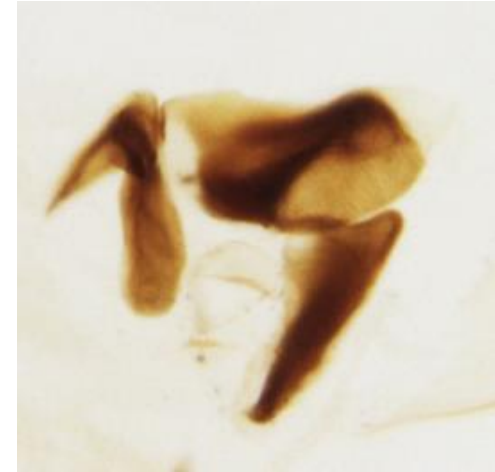

*flexicornis*

**MALE MISSING**

*hemichlorus*

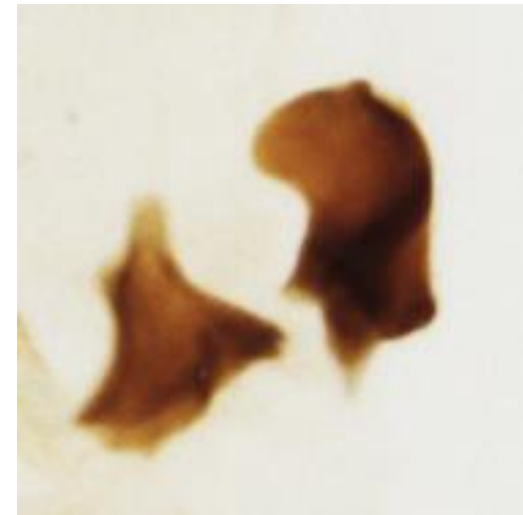

*lamtoensis*

Lamella copulatrix

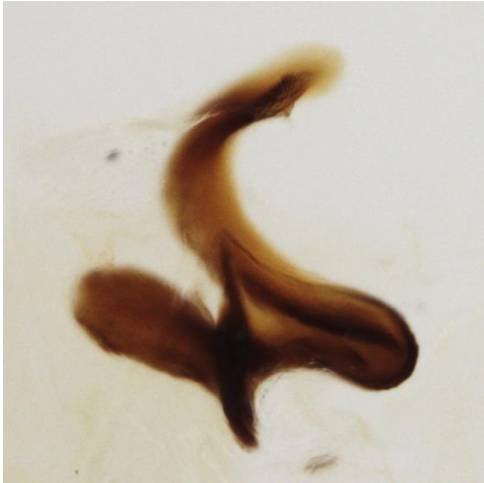

*liberianus*

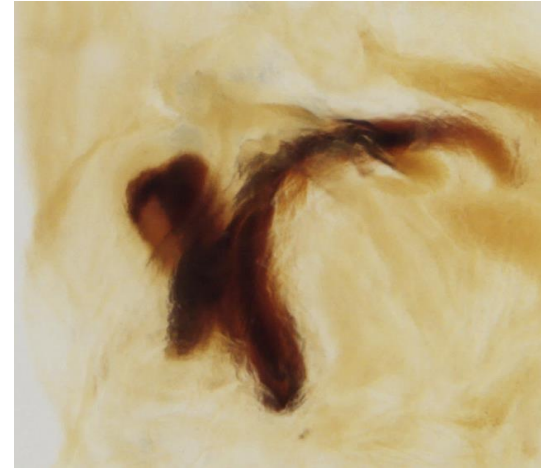

*macroliberianus*

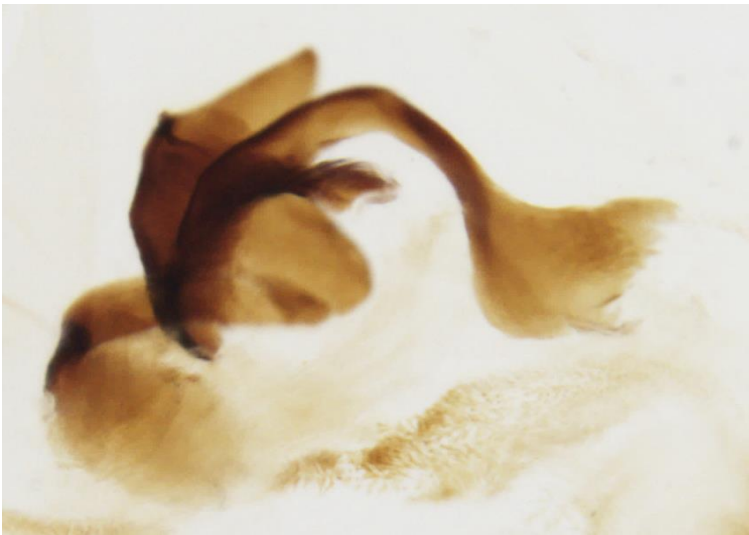

*naevius*

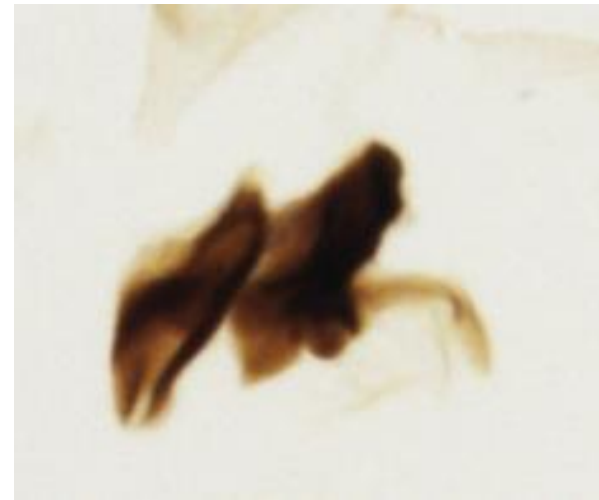

*pendjarius*

Lamella copulatrix

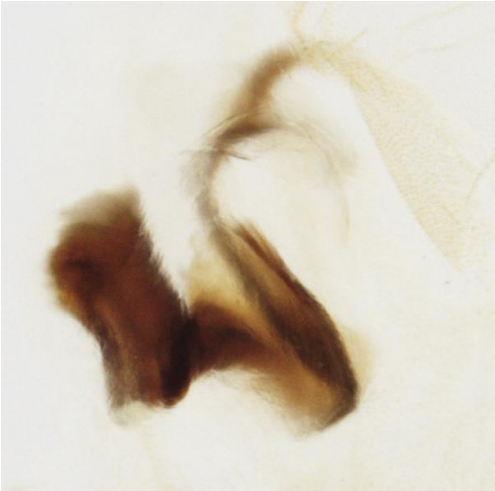

***pseudolibrianus***

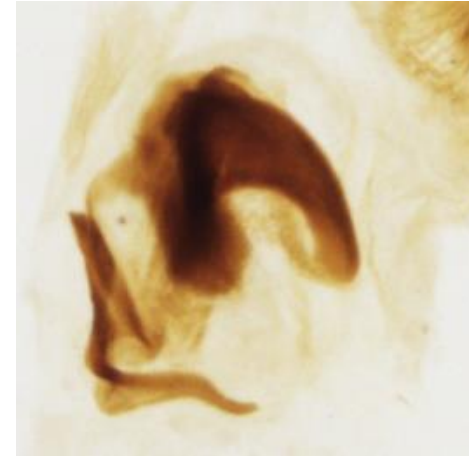

***rougonorum***

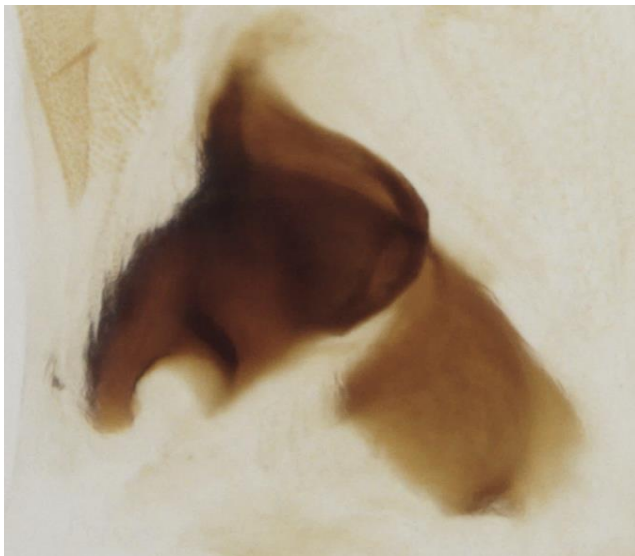

***rufobasalis***

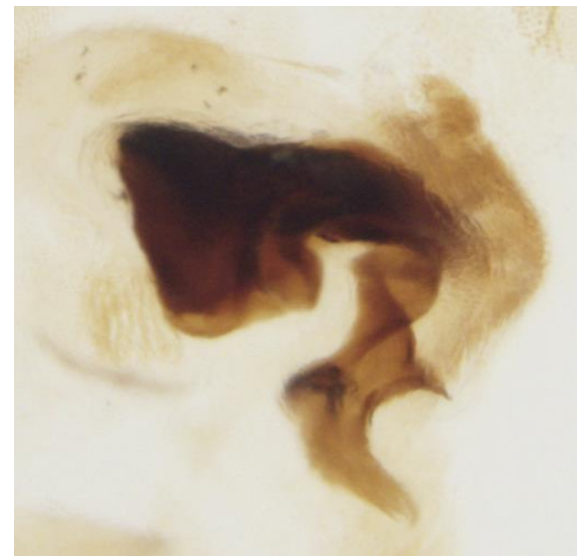

***rufopygus***

Lamella copulatrix

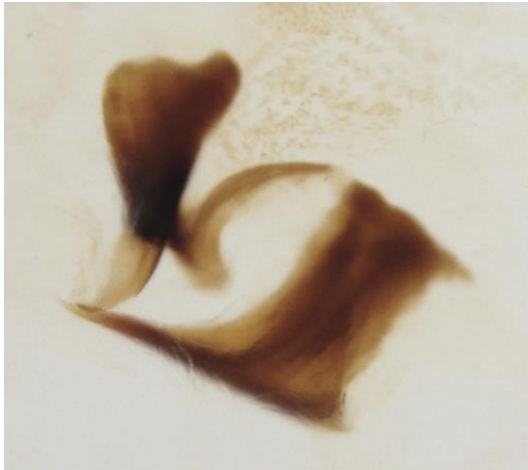

***rufostillans***

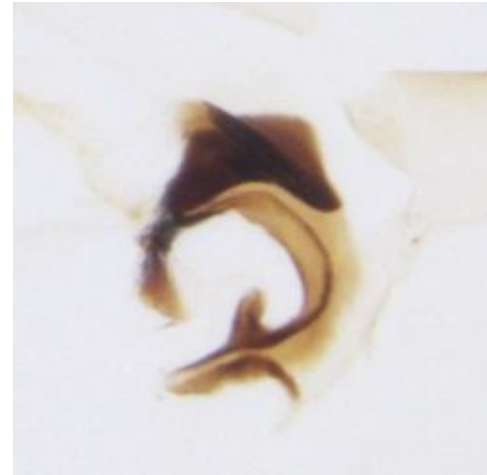

***schaufussi***

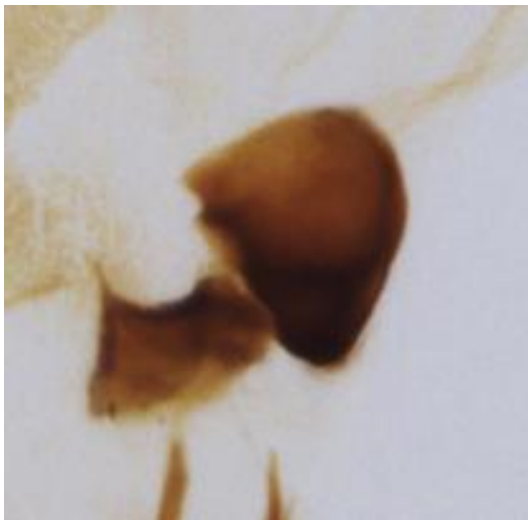

***viridiaereus***

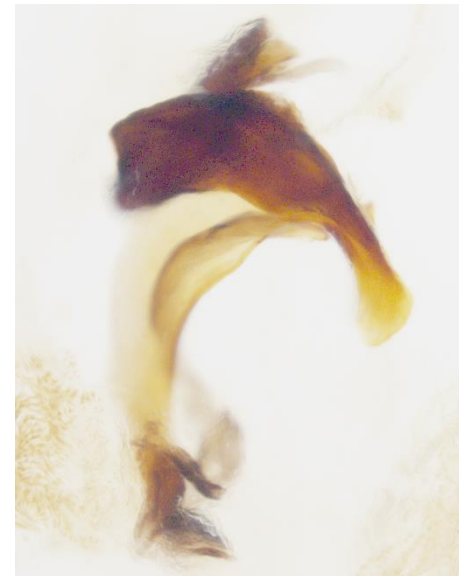

***zavattarii***



Lamella copulatrix

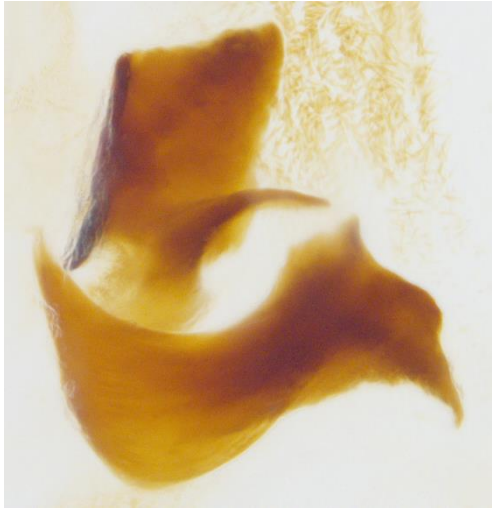

*angolensis*

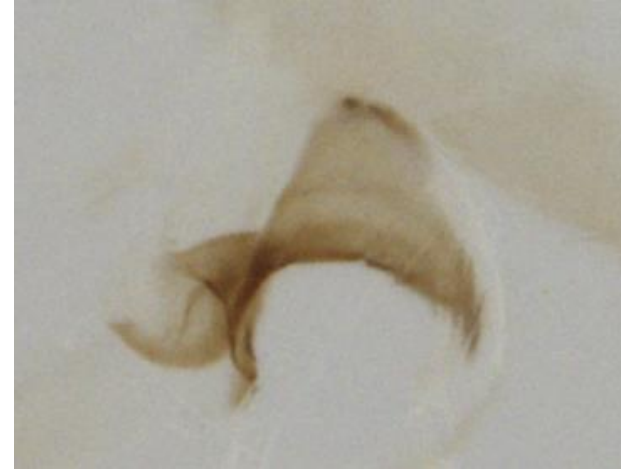

*jossoi*

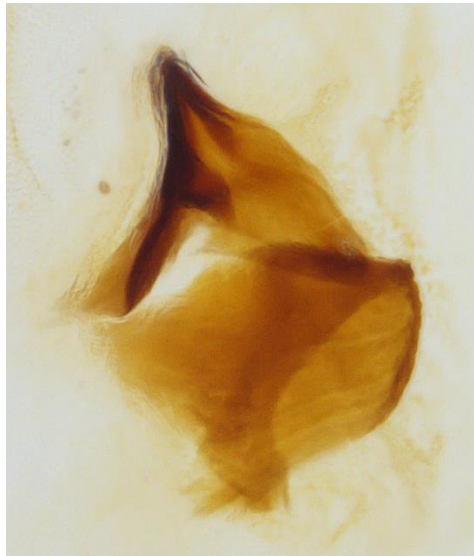

*katanganus*

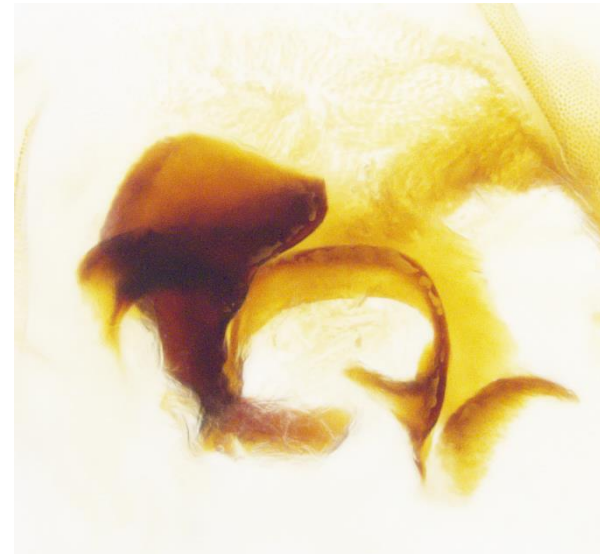

*rolandoi*

Lamella copulatrix

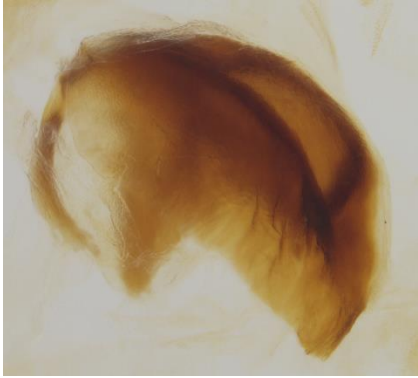

***saadaniensis***

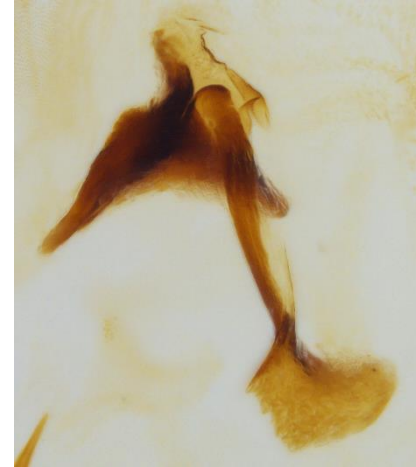

***zambesianus***

**Female genitalia**

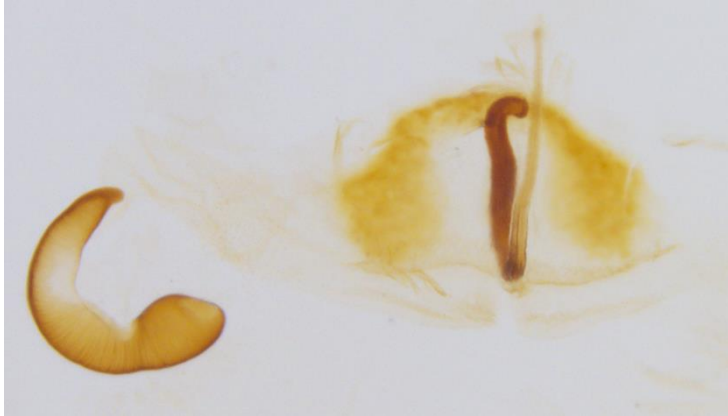

***aedequatus***

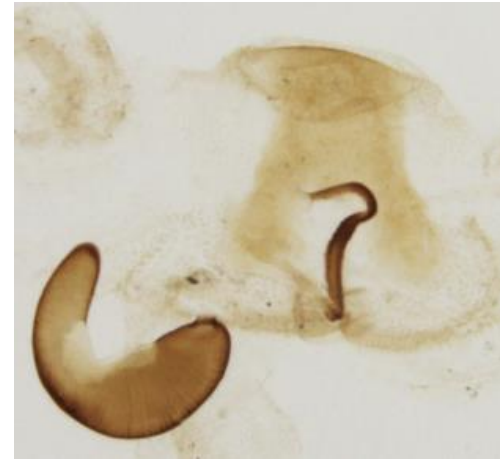

***chrysoderus***

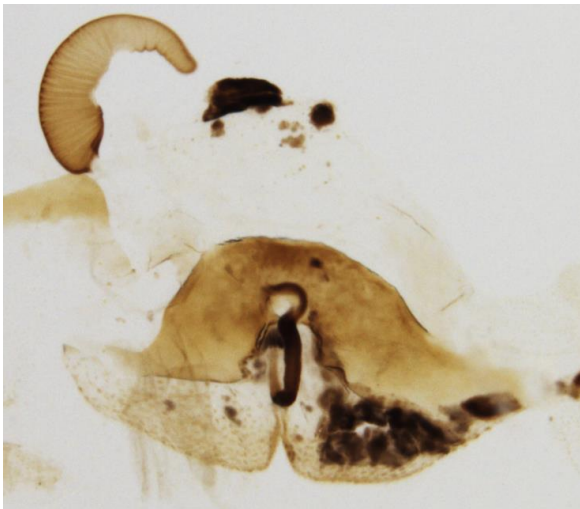

***curtipilis***

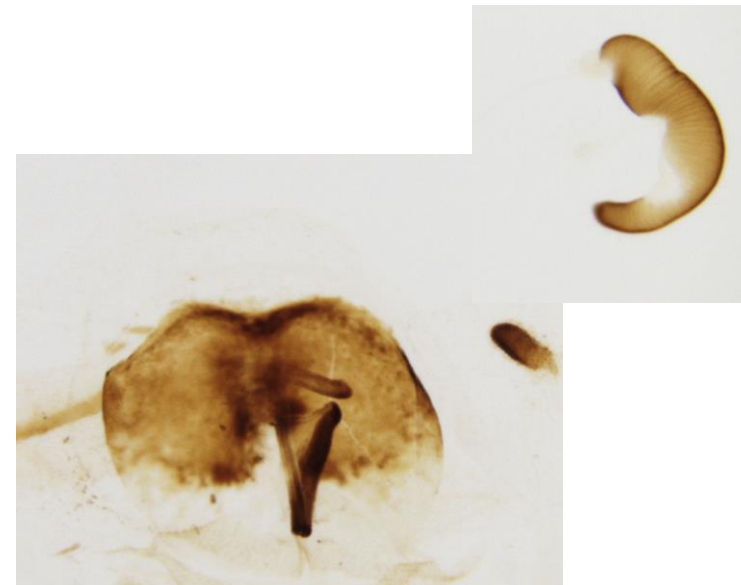

***delahayei***

Female genitalia

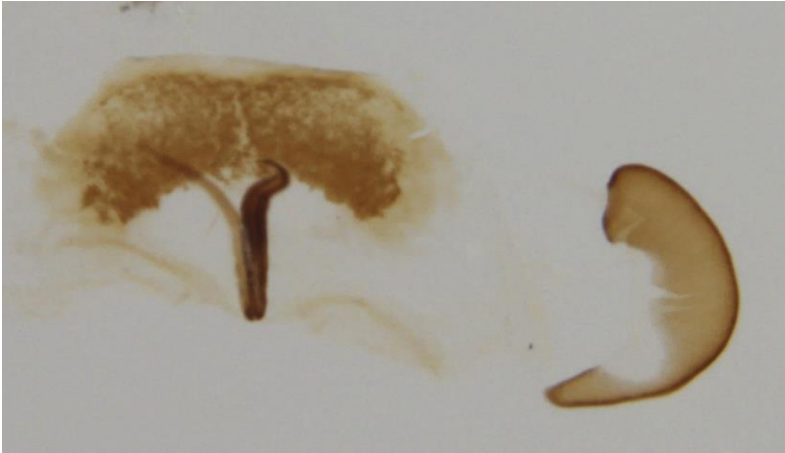

*ebenus*

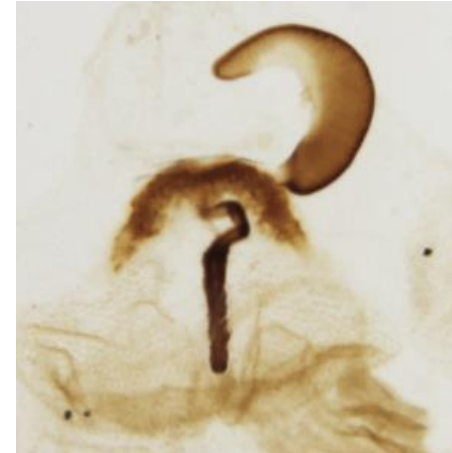

*flexicornis*

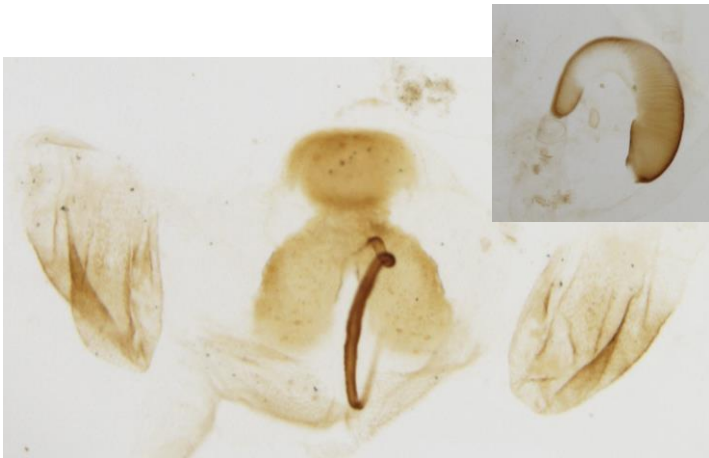

*hemichlorus*

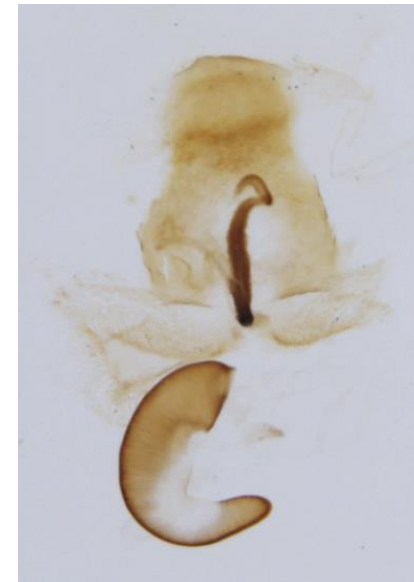

*lamtoensis*



**Female genitalia**

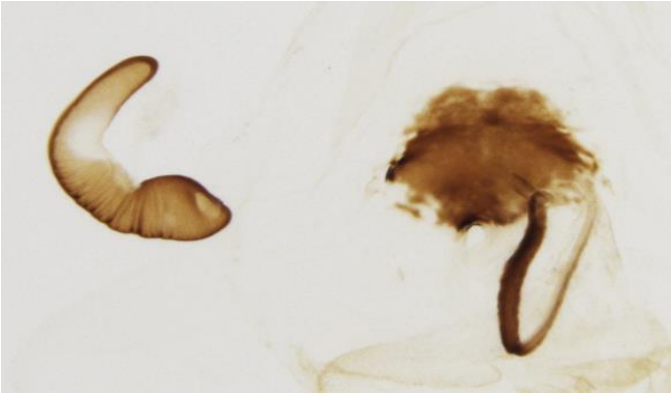

***liberianus***

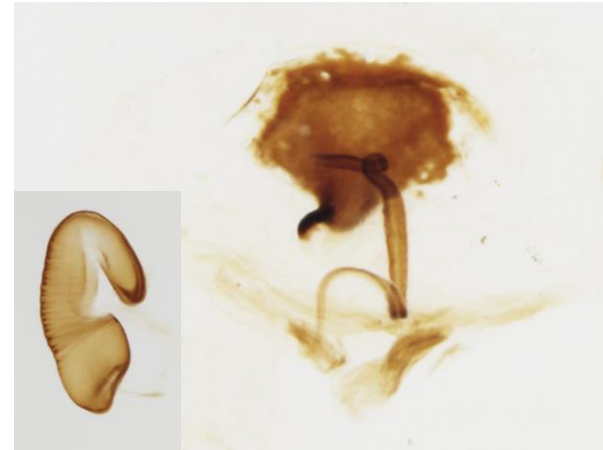

***macroliberianus***

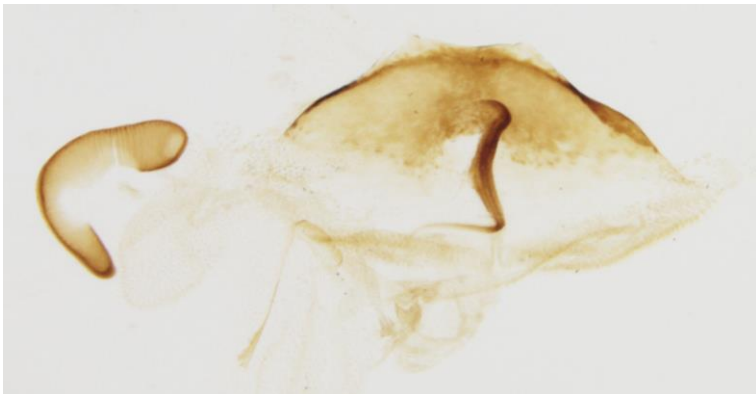

***naevius***

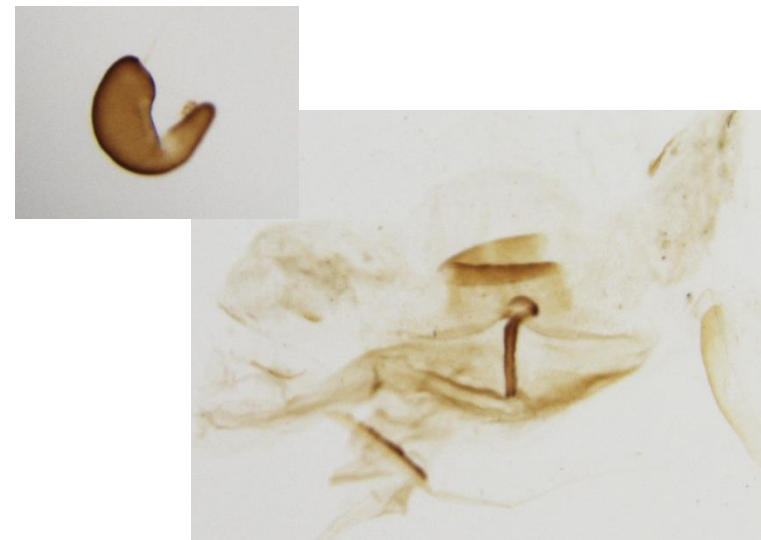

***pendjarius***

## Female genitalia

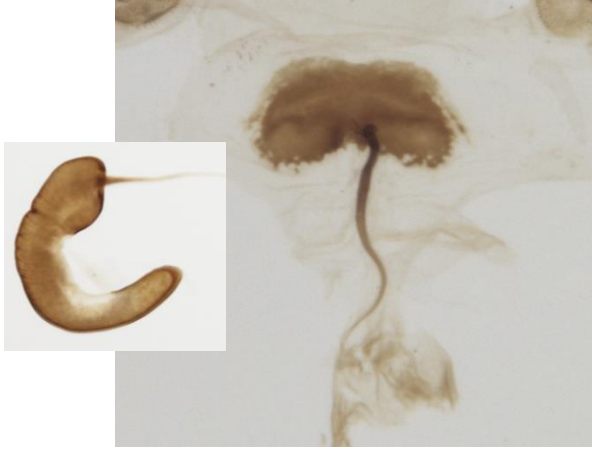

*pseudolibertianus*

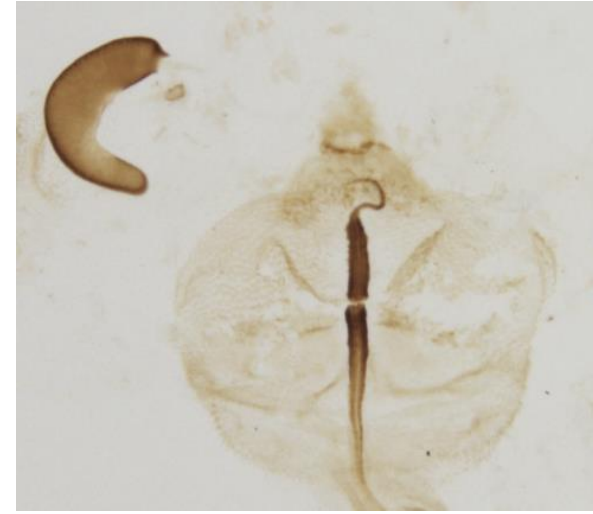

*rougonorum*

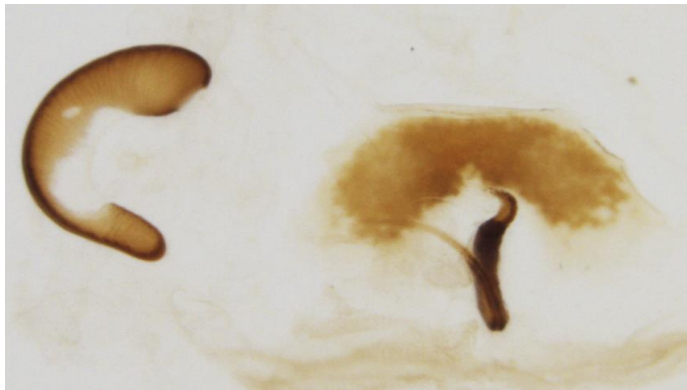

*rufobasalis*

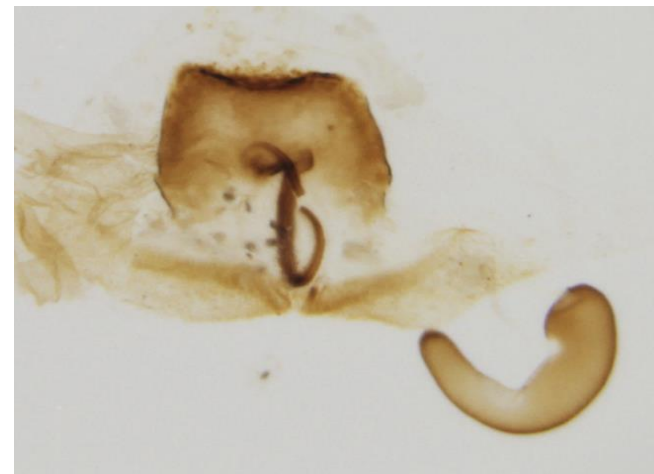

*rufopygus*

**Female genitalia**

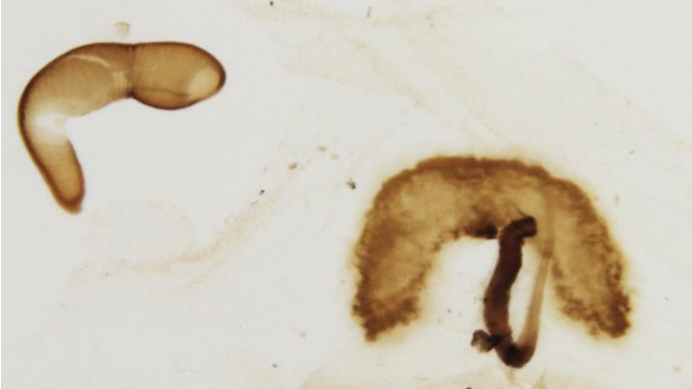

***rufostillans***

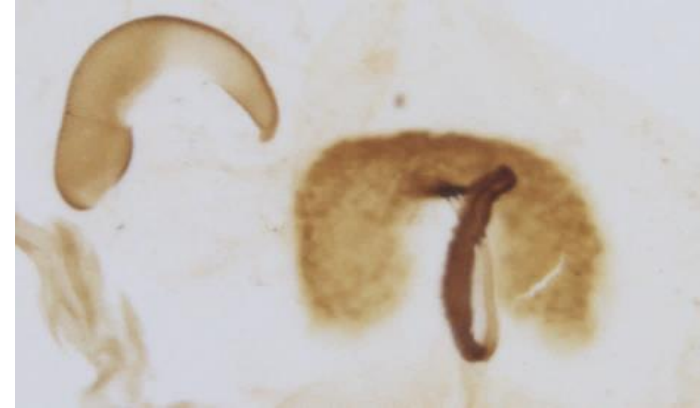

***schaufussi***

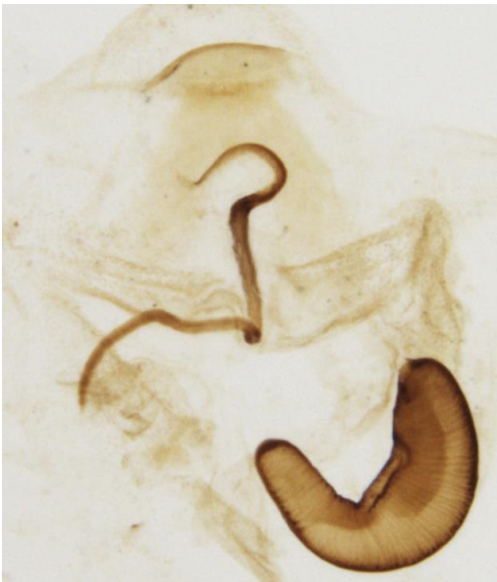

***viridiaereus***

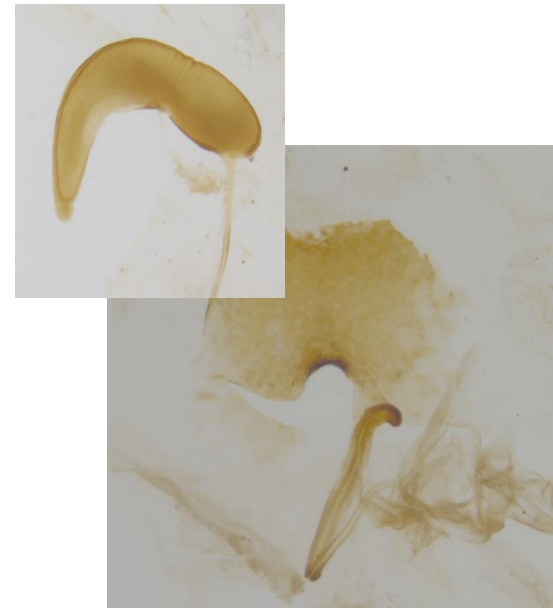

***zavattarii***

**Female genitalia**

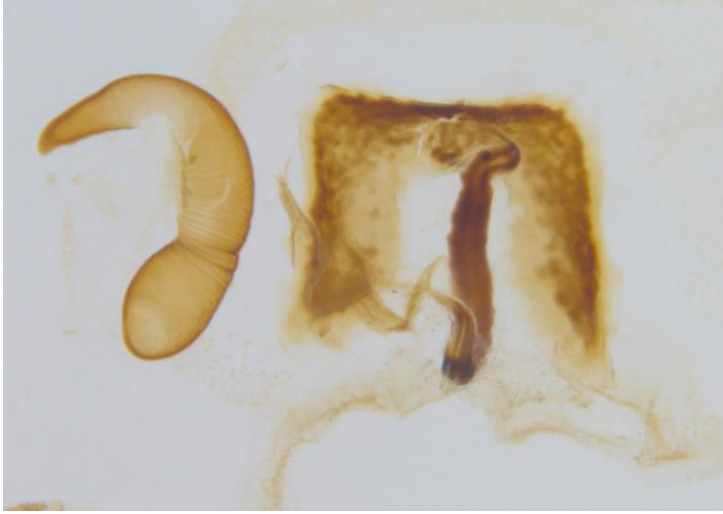

***angolensis***

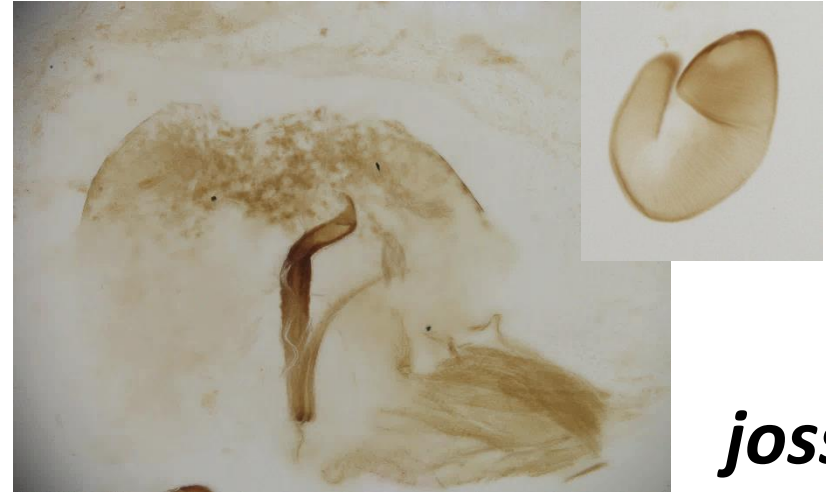

***jossoi***

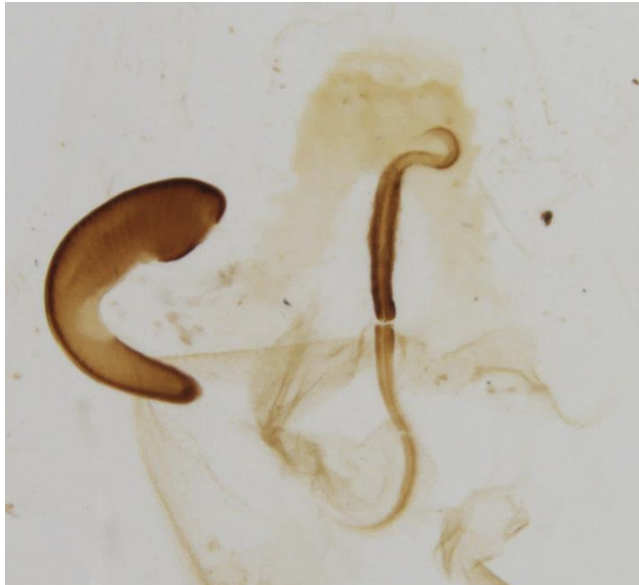

***katanganus***

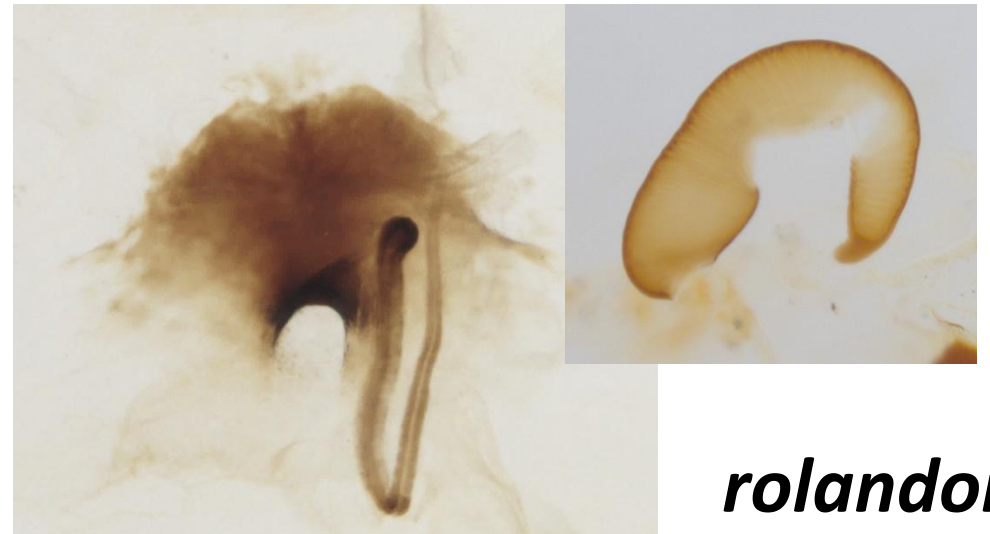

***rolandoi***



**Female genitalia**

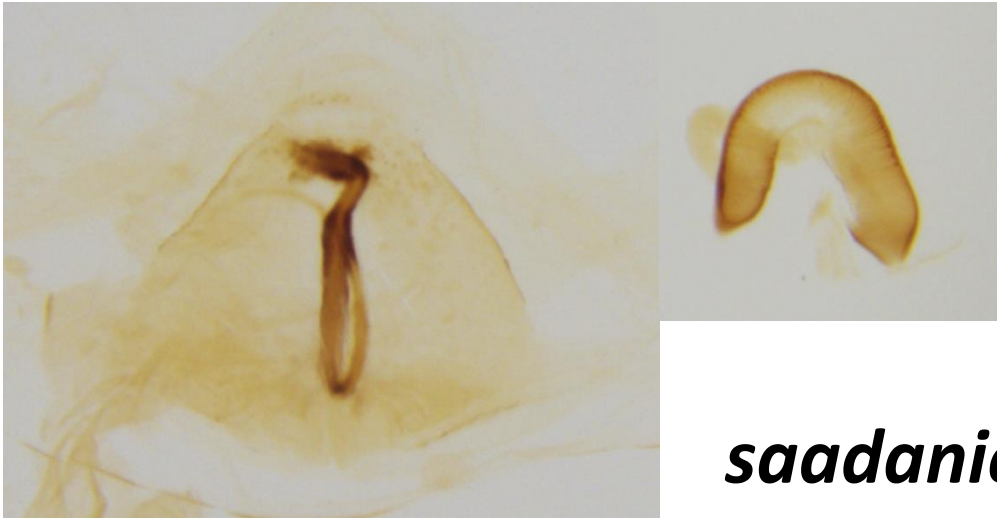

***saadaniensis***

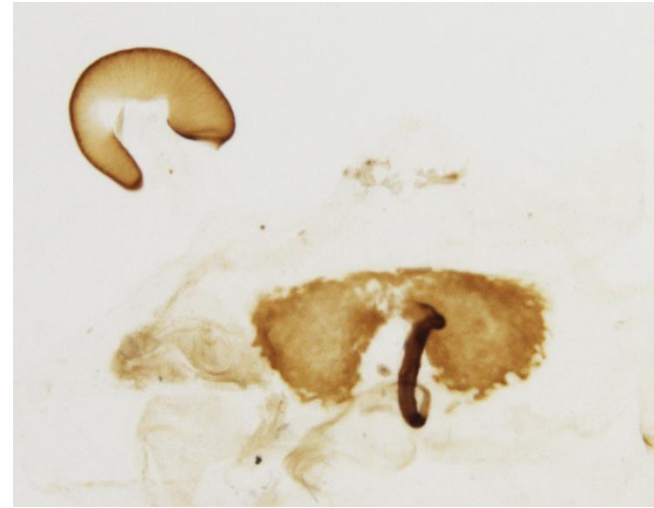

***zambesianus***
