# Supplementary material for: The Phylogenetic Relationships of Tiaronthophagus n.gen. (Coleoptera, Scarabaeidae, Onthophagini) Evaluated by Phenotypic Characters
Source: Insects. 2019 Mar 1;10(3):64. doi: 10.3390/insects10030064 (PMC6468411; doi:10.3390/insects10030064)
Supplement: Supplementary file 1 [file insects-10-00064-s001.zip]

Archive with 6 entries (6 files):
- Roggero Data S1 Discrete Characters List.pdf
- Roggero Data S2 Matrix.pdf
- Roggero Data S3 Common Synapomorphies.pdf
- Roggero Data S4 VIP Results.pdf
- Roggero Data S5 List of the morphological features.pdf
- Roggero Data S6 Identification Plates.pdf
